# Supplementary material for: Identification of serum protein biomarkers in individuals with Niemann-Pick disease, type C1
Source: Research Square preprint supplement (doi:10.21203/rs.3.rs-8833559/v1), 2026-02-23
Supplement: Supplementary file 2 [file 7a4777fa8cfde974db0290c9.xlsx]

## Sheet: ST1_Cohortdetail
NPC1 Individuals					Healthy Pediatric Control
Sample	Age (Years)	Sex	Miglustat		Sample	Age (years)	Sex
NPC3e	18	F	Yes		C101	11.8	F
NPC5d	11.5	M	No		C102	13.6	M
NPC5g	18.6	M	Yes		C105	9.2	M
NPC6d	17.9	M	No		C107	12.8	F
NPC8c	5.8	F	Yes		C108	7.5	M
NPC9e	12.8	M	Yes		C109	8.3	M
NPC12f	8.2	F	Yes		C113	6.3	F
NPC17d	10.4	M	Yes		C115	9.7	M
NPC23b	8.7	F	Yes		C116	8.7	F
NPC28a	3.4	F	No		C119	10.1	M
NPC28b	4.8	F	Yes		C120	4.8	M
NPC29a	13.6	F	Yes		C124	15.3	M
NPC34c	5.4	F	Yes		C135	7.5	M
NPC36a	6.9	F	Yes		C144	15.7	M
NPC38b	20.2	F	Yes		C149	13.6	F
NPC40a	0.6	M	No		C151	10.9	M
NPC40d	2.7	M	Yes		C303	15	F
NPC41b	2.4	M	No		C305	17.6	F
NPC41c	3.6	M	Yes		C306	17.3	M
NPC44b	22.3	M	No		C314	18	M
NPC44c	25.6	M	Yes
NPC49c	5.6	M	Yes
NPC50a	12.5	F	Yes
NPC52c	16.7	F	Yes
NPC54a	17.2	M	No
NPC54c	19.3	M	Yes
NPC60a	15.2	M	Yes
NPC61a	11.8	F	Yes
NPC62b	0.9	F	No
NPC65a	13.7	M	No
NPC65b	14.5	M	Yes
NPC67a	16.4	M	Yes
NPC69a	0.9	M	Yes
NPC70b	1.7	F	No
NPC72	22.6	F	Yes
NPC73a	17.2	M	Yes
NPC75a	8.9	M	Yes
NPC76a	9.8	F	Yes
NPC77c	1.6	M	Yes
NPC77h	5.4	M	Yes
NPC82f	6.8	M	Yes
NPC83a	35.4	M	Yes
NPC86a	32.6	F	Yes
NPC88a	4.2	F	Yes
NPC90a	29.9	M	No
NPC90b	32.9	M	Yes
NPC91a	26.7	M	No
NPC91b	29.7	M	No
NPC92a	6.1	F	No
NPC92b	8.3	F	Yes
NPC93a	1.8	F	No
NPC95a	68.2	F	No
NPC98b	6.9	M	Yes
NPC102a	3.3	M	No
NPC105c	6.9	F	No
NPC108a	1.3	M	Yes
NPC109a	8.9	F	No
NPC109b	9.5	F	Yes
NPC111a	3.4	F	No
NPC114c	2.9	F	No
NPC114d	4	F	Yes
NPC115a	64.7	F	No
NPC118a	19	M	No
NPC121a	7.7	M	Yes
NPC123a	4.4	F	No
NPC127a	36.9	F	No
NPC130a	30	F	Yes
NPC133b	30.9	F	Yes

## Sheet: ST2_Npc vs ctrl
Assay	GeneID	Panel	UniProt	OlinkID	Effect	pes	p.value	Adjusted_pval	Threshold	log2FC	Adjusted Log2FC (estimate)	formula	df	MSE
CTSL	ENSG00000135047	Cardiometabolic	P07711	OID20228	NPC1	0.939099	3.2037e-25	9.16578e-22	Significant	2.60077	2.58173	NPX ~ NPC1 * Age_c + Sex + Error(SampleID)	39	0.10
GPNMB	ENSG00000136235	Cardiometabolic	Q14956	OID20173	NPC1	0.933447	1.75405e-24	2.50917e-21	Significant	1.3574	1.42126	NPX ~ NPC1 * Age_c + Sex + Error(SampleID)	39	0.03
CDCP1	ENSG00000163814	Neurology	Q9H5V8	OID20940	NPC1	0.931156	6.95073e-24	4.97151e-21	Significant	3.93238	3.99483	NPX ~ NPC1 * Age_c + Sex + Error(SampleID)	38	0.28
IL18BP	ENSG00000137496	Cardiometabolic	O95998	OID20348	NPC1	0.928971	6.62077e-24	4.97151e-21	Significant	2.24436	2.21352	NPX ~ NPC1 * Age_c + Sex + Error(SampleID)	39	0.09
PLA2G7	ENSG00000146070	Neurology	Q13093	OID21105	NPC1	0.92219	4.03413e-23	2.30833e-20	Significant	1.9879	1.89452	NPX ~ NPC1 * Age_c + Sex + Error(SampleID)	39	0.07
SIGLEC8	ENSG00000105366	Cardiometabolic_II	Q9NYZ4	OID30261	NPC1	0.919819	2.1919e-22	1.04517e-19	Significant	3.53119	3.592	NPX ~ NPC1 * Age_c + Sex + Error(SampleID)	38	0.26
CCL18	ENSG00000275385	Cardiometabolic	P55774	OID20395	NPC1	0.89958	5.43326e-21	2.22065e-18	Significant	3.1621	3.20678	NPX ~ NPC1 * Age_c + Sex + Error(SampleID)	39	0.27
COL4A1	ENSG00000187498	Cardiometabolic	P02462	OID20208	NPC1	0.881477	1.32757e-19	4.74771e-17	Significant	2.63762	2.91781	NPX ~ NPC1 * Age_c + Sex + Error(SampleID)	39	0.27
AXL	ENSG00000167601	Cardiometabolic	P30530	OID20363	NPC1	0.862855	2.44375e-18	7.7684e-16	Significant	1.36776	1.38898	NPX ~ NPC1 * Age_c + Sex + Error(SampleID)	39	0.07
MANSC4	ENSG00000205693	Cardiometabolic_II	A6NHS7	OID30141	NPC1	0.861997	2.74042e-18	7.84034e-16	Significant	4.11623	4.28314	NPX ~ NPC1 * Age_c + Sex + Error(SampleID)	39	0.69
ADA2	ENSG00000093072	Cardiometabolic	Q9NZK5	OID20394	NPC1	0.852888	9.23153e-18	2.40104e-15	Significant	1.84066	1.92675	NPX ~ NPC1 * Age_c + Sex + Error(SampleID)	39	0.15
NPC2	ENSG00000119655	Cardiometabolic_II	P61916	OID30418	NPC1	0.845126	2.58519e-17	6.16352e-15	Significant	1.56337	1.59258	NPX ~ NPC1 * Age_c + Sex + Error(SampleID)	39	0.11
PSAP	ENSG00000197746	Cardiometabolic_II	P07602	OID30419	NPC1	0.843215	3.20598e-17	7.05562e-15	Significant	1.42824	1.53422	NPX ~ NPC1 * Age_c + Sex + Error(SampleID)	39	0.10
NPL	ENSG00000135838	Cardiometabolic_II	Q9BXD5	OID30329	NPC1	0.8383	3.03482e-16	6.20188e-14	Significant	3.23111	3.24667	NPX ~ NPC1 * Age_c + Sex + Error(SampleID)	38	0.49
HLA-DRA	ENSG00000204287	Inflammation	P01903	OID20520	NPC1	0.807513	3.00779e-15	5.73685e-13	Significant	2.56203	2.69811	NPX ~ NPC1 * Age_c + Sex + Error(SampleID)	37	0.42
GDF15	ENSG00000130513	Cardiometabolic	Q99988	OID20251	NPC1	0.794383	6.82237e-15	1.21993e-12	Significant	1.74971	1.7019	NPX ~ NPC1 * Age_c + Sex + Error(SampleID)	39	0.18
GM2A	ENSG00000196743	Cardiometabolic_II	P17900	OID30413	NPC1	0.78754	1.29579e-14	2.18074e-12	Significant	1.71036	1.71516	NPX ~ NPC1 * Age_c + Sex + Error(SampleID)	39	0.19
SMOC1	ENSG00000198732	Oncology	Q9H4F8	OID21461	NPC1	0.786361	1.61836e-14	2.5723e-12	Significant	1.60789	1.49699	NPX ~ NPC1 * Age_c + Sex + Error(SampleID)	38	0.14
CD80	ENSG00000121594	Cardiometabolic_II	P33681	OID30291	NPC1	0.780533	6.20974e-14	9.35056e-12	Significant	1.40329	1.61404	NPX ~ NPC1 * Age_c + Sex + Error(SampleID)	38	0.17
TFPI2	ENSG00000105825	Oncology	P48307	OID21512	NPC1	0.767198	7.85106e-14	1.12309e-11	Significant	2.22701	2.17094	NPX ~ NPC1 * Age_c + Sex + Error(SampleID)	39	0.34
TNFSF8	ENSG00000106952	Cardiometabolic_II	P32971	OID30384	NPC1	0.761129	1.16121e-13	1.58202e-11	Significant	1.42479	1.58085	NPX ~ NPC1 * Age_c + Sex + Error(SampleID)	39	0.18
ADGRE1	ENSG00000174837	Oncology_II	Q14246	OID31483	NPC1	0.748946	3.3531e-13	4.36056e-11	Significant	1.93972	2.00078	NPX ~ NPC1 * Age_c + Sex + Error(SampleID)	39	0.32
PILRA	ENSG00000085514	Neurology	Q9UKJ1	OID21129	NPC1	0.742657	5.88896e-13	7.32536e-11	Significant	1.48342	1.37017	NPX ~ NPC1 * Age_c + Sex + Error(SampleID)	39	0.15
TREM2	ENSG00000095970	Inflammation	Q9NZC2	OID20731	NPC1	0.73799	7.58086e-13	9.03702e-11	Significant	2.86684	2.85667	NPX ~ NPC1 * Age_c + Sex + Error(SampleID)	39	0.68
NPY	ENSG00000122585	Oncology	P01303	OID21388	NPC1	0.739827	8.82412e-13	1.00983e-10	Significant	2.21539	2.23304	NPX ~ NPC1 * Age_c + Sex + Error(SampleID)	38	0.42
CD200R1	ENSG00000163606	Inflammation	Q8TD46	OID20595	NPC1	0.737616	9.44404e-13	1.03921e-10	Significant	0.903469	0.923892	NPX ~ NPC1 * Age_c + Sex + Error(SampleID)	37	0.07
DSCAM	ENSG00000171587	Neurology_II	O60469	OID30993	NPC1	0.726636	1.69986e-12	1.80122e-10	Significant	1.6316	1.80983	NPX ~ NPC1 * Age_c + Sex + Error(SampleID)	39	0.29
AGRP	ENSG00000159723	Inflammation	O00253	OID20658	NPC1	0.734716	3.19868e-12	3.20628e-10	Significant	2.21895	2.167	NPX ~ NPC1 * Age_c + Sex + Error(SampleID)	37	0.41
CD83	ENSG00000112149	Inflammation	Q01151	OID20565	NPC1	0.724086	3.24998e-12	3.20628e-10	Significant	1.36884	1.37329	NPX ~ NPC1 * Age_c + Sex + Error(SampleID)	37	0.18
HAVCR2	ENSG00000135077	Neurology	Q8TDQ0	OID21137	NPC1	0.710259	5.61957e-12	5.3592e-10	Significant	1.6324	1.6017	NPX ~ NPC1 * Age_c + Sex + Error(SampleID)	39	0.25
CALB1	ENSG00000104327	Oncology	P05937	OID21306	NPC1	0.723502	7.20381e-12	6.64842e-10	Significant	1.55527	1.7058	NPX ~ NPC1 * Age_c + Sex + Error(SampleID)	37	0.26
SIGLEC7	ENSG00000168995	Cardiometabolic	Q9Y286	OID20190	NPC1	0.692808	1.69479e-11	1.51525e-09	Significant	0.816468	0.85107	NPX ~ NPC1 * Age_c + Sex + Error(SampleID)	39	0.08
CD300C	ENSG00000167850	Neurology	Q08708	OID21010	NPC1	0.686218	2.64987e-11	2.29735e-09	Significant	1.06648	1.06829	NPX ~ NPC1 * Age_c + Sex + Error(SampleID)	39	0.12
CD4	ENSG00000010610	Inflammation	P01730	OID20584	NPC1	0.69179	3.10059e-11	2.60905e-09	Significant	1.10897	1.13796	NPX ~ NPC1 * Age_c + Sex + Error(SampleID)	37	0.14
CD72	ENSG00000137101	Inflammation_II	P21854	OID30641	NPC1	0.68282	3.19704e-11	2.61335e-09	Significant	1.342	1.48172	NPX ~ NPC1 * Age_c + Sex + Error(SampleID)	39	0.24
B3GNT7	ENSG00000156966	Cardiometabolic_II	Q8NFL0	OID30281	NPC1	0.68865	3.79797e-11	3.01833e-09	Significant	1.22462	1.2995	NPX ~ NPC1 * Age_c + Sex + Error(SampleID)	38	0.18
CEND1	ENSG00000184524	Neurology_II	Q8N111	OID30821	NPC1	0.684763	5.06584e-11	3.91713e-09	Significant	2.07793	2.34002	NPX ~ NPC1 * Age_c + Sex + Error(SampleID)	38	0.60
MSR1	ENSG00000038945	Neurology	P21757	OID21063	NPC1	0.66812	7.96624e-11	5.84396e-09	Significant	1.99263	2.03568	NPX ~ NPC1 * Age_c + Sex + Error(SampleID)	39	0.49
CD300A	ENSG00000167851	Inflammation_II	Q9UGN4	OID30576	NPC1	0.668453	7.85768e-11	5.84396e-09	Significant	1.00991	1.0082	NPX ~ NPC1 * Age_c + Sex + Error(SampleID)	39	0.12
ADGRE5	ENSG00000123146	Cardiometabolic	P48960	OID20260	NPC1	0.667224	8.43222e-11	6.03114e-09	Significant	0.966953	1.01323	NPX ~ NPC1 * Age_c + Sex + Error(SampleID)	39	0.12
GFRA2	ENSG00000168546	Oncology	O00451	OID21330	NPC1	0.683098	9.38414e-11	6.5483e-09	Significant	0.47908	0.467945	NPX ~ NPC1 * Age_c + Sex + Error(SampleID)	37	0.02
CD163	ENSG00000177575	Cardiometabolic	Q86VB7	OID20360	NPC1	0.66119	1.21816e-10	8.298e-09	Significant	1.28936	1.29257	NPX ~ NPC1 * Age_c + Sex + Error(SampleID)	39	0.20
ACP5	ENSG00000102575	Cardiometabolic	P13686	OID20314	NPC1	0.655914	1.56084e-10	1.0385e-08	Significant	0.87293	0.923573	NPX ~ NPC1 * Age_c + Sex + Error(SampleID)	39	0.11
LILRA2	ENSG00000239998	Neurology	Q8N149	OID21152	NPC1	0.648067	2.50233e-10	1.62708e-08	Significant	1.53511	1.61081	NPX ~ NPC1 * Age_c + Sex + Error(SampleID)	39	0.33
HSD17B14	ENSG00000087076	Neurology_II	Q9BPX1	OID31098	NPC1	0.642812	3.70876e-10	2.35795e-08	Significant	2.96261	2.75012	NPX ~ NPC1 * Age_c + Sex + Error(SampleID)	39	1.00
DPEP2	ENSG00000167261	Oncology	Q9H4A9	OID21305	NPC1	0.657851	3.96466e-10	2.46585e-08	Significant	1.00496	0.992594	NPX ~ NPC1 * Age_c + Sex + Error(SampleID)	37	0.12
EREG	ENSG00000124882	Neurology	O14944	OID20905	NPC1	0.632411	5.53027e-10	3.3664e-08	Significant	-4.02208	-3.76216	NPX ~ NPC1 * Age_c + Sex + Error(SampleID)	38	1.92
IL18	ENSG00000150782	Inflammation	Q14116	OID20694	NPC1	0.632607	5.6918e-10	3.39255e-08	Significant	1.37344	1.47499	NPX ~ NPC1 * Age_c + Sex + Error(SampleID)	39	0.30
LGALS9	ENSG00000168961	Inflammation	O00182	OID20781	NPC1	0.63189	6.30569e-10	3.68175e-08	Significant	1.16755	1.13361	NPX ~ NPC1 * Age_c + Sex + Error(SampleID)	39	0.18
SIRPB1	ENSG00000101307	Inflammation	O00241	OID20739	NPC1	0.626867	8.49753e-10	4.86229e-08	Significant	1.42461	1.34359	NPX ~ NPC1 * Age_c + Sex + Error(SampleID)	39	0.25
HS6ST1	ENSG00000136720	Oncology	O60243	OID21441	NPC1	0.628088	8.91445e-10	5.00083e-08	Significant	0.946715	1.00484	NPX ~ NPC1 * Age_c + Sex + Error(SampleID)	38	0.14
PTPRH	ENSG00000080031	Oncology_II	Q9HD43	OID31433	NPC1	0.621196	1.11504e-09	6.13485e-08	Significant	1.49695	1.60852	NPX ~ NPC1 * Age_c + Sex + Error(SampleID)	39	0.37
CD244	ENSG00000122223	Inflammation	Q9BZW8	OID20628	NPC1	0.6356	1.22997e-09	6.6395e-08	Significant	0.713219	0.730152	NPX ~ NPC1 * Age_c + Sex + Error(SampleID)	37	0.07
CD74	ENSG00000019582	Neurology	P04233	OID21040	NPC1	0.617693	1.26615e-09	6.70824e-08	Significant	0.888803	0.920744	NPX ~ NPC1 * Age_c + Sex + Error(SampleID)	39	0.12
DSC2	ENSG00000134755	Neurology	Q02487	OID21079	NPC1	0.618798	1.34178e-09	6.97972e-08	Significant	0.941191	0.836626	NPX ~ NPC1 * Age_c + Sex + Error(SampleID)	39	0.10
ADGRE2	ENSG00000127507	Inflammation	Q9UHX3	OID20755	NPC1	0.615742	1.38516e-09	7.07671e-08	Significant	0.847899	0.938401	NPX ~ NPC1 * Age_c + Sex + Error(SampleID)	39	0.13
THPO	ENSG00000090534	Cardiometabolic	P40225	OID20098	NPC1	0.663124	1.76909e-09	8.8796e-08	Significant	-1.21323	-1.14812	NPX ~ NPC1 * Age_c + Sex + Error(SampleID)	32	0.16
SLAMF8	ENSG00000158714	Oncology	Q9P0V8	OID21214	NPC1	0.636027	2.02769e-09	1.00021e-07	Significant	1.85516	1.88738	NPX ~ NPC1 * Age_c + Sex + Error(SampleID)	36	0.48
CR2	ENSG00000117322	Cardiometabolic	P20023	OID20393	NPC1	0.592146	4.32245e-09	2.09602e-07	Significant	0.718791	0.99277	NPX ~ NPC1 * Age_c + Sex + Error(SampleID)	39	0.16
LMNB2	ENSG00000176619	Neurology_II	Q03252	OID31109	NPC1	0.590312	5.03139e-09	2.39914e-07	Significant	1.49134	1.56177	NPX ~ NPC1 * Age_c + Sex + Error(SampleID)	39	0.40
NEFL	ENSG00000277586	Neurology	P07196	OID20871	NPC1	0.629509	5.19697e-09	2.43747e-07	Significant	2.72586	2.58707	NPX ~ NPC1 * Age_c + Sex + Error(SampleID)	35	0.89
NCR3LG1	ENSG00000188211	Oncology_II	Q68D85	OID31490	NPC1	0.588737	5.52426e-09	2.54918e-07	Significant	1.12763	1.13997	NPX ~ NPC1 * Age_c + Sex + Error(SampleID)	39	0.21
PIK3IP1	ENSG00000100100	Neurology	Q96FE7	OID21094	NPC1	0.58633	5.89197e-09	2.6757e-07	Significant	0.667183	0.671768	NPX ~ NPC1 * Age_c + Sex + Error(SampleID)	39	0.07
HMOX1	ENSG00000100292	Cardiometabolic	P09601	OID20217	NPC1	0.586847	6.14652e-09	2.70541e-07	Significant	1.69522	1.73189	NPX ~ NPC1 * Age_c + Sex + Error(SampleID)	39	0.50
CA4	ENSG00000167434	Cardiometabolic	P22748	OID20241	NPC1	0.586901	6.10441e-09	2.70541e-07	Significant	-0.656091	-0.684965	NPX ~ NPC1 * Age_c + Sex + Error(SampleID)	39	0.08
LAIR1	ENSG00000167613	Inflammation	Q6GTX8	OID20737	NPC1	0.583462	7.10335e-09	3.0792e-07	Significant	1.0459	0.987532	NPX ~ NPC1 * Age_c + Sex + Error(SampleID)	39	0.16
CD160	ENSG00000117281	Inflammation	O95971	OID20647	NPC1	0.598401	7.56342e-09	3.14617e-07	Significant	1.12467	1.06808	NPX ~ NPC1 * Age_c + Sex + Error(SampleID)	37	0.19
LILRB2	ENSG00000131042	Cardiometabolic	Q8N423	OID20301	NPC1	0.582394	7.58776e-09	3.14617e-07	Significant	1.00014	0.970354	NPX ~ NPC1 * Age_c + Sex + Error(SampleID)	39	0.16
ANXA11	ENSG00000122359	Inflammation	P50995	OID20583	NPC1	0.576067	7.56109e-09	3.14617e-07	Significant	0.601672	0.622507	NPX ~ NPC1 * Age_c + Sex + Error(SampleID)	37	0.07
LILRB1	ENSG00000104972	Cardiometabolic	Q8NHL6	OID20323	NPC1	0.580567	7.7085e-09	3.15057e-07	Significant	0.754166	0.799735	NPX ~ NPC1 * Age_c + Sex + Error(SampleID)	39	0.11
PTP4A3	ENSG00000184489	Inflammation_II	O75365	OID30469	NPC1	0.577394	1.01284e-08	4.08131e-07	Significant	1.40565	1.25389	NPX ~ NPC1 * Age_c + Sex + Error(SampleID)	39	0.27
CPVL	ENSG00000106066	Oncology	Q9H3G5	OID21435	NPC1	0.574817	1.04183e-08	4.13983e-07	Significant	0.851548	0.882394	NPX ~ NPC1 * Age_c + Sex + Error(SampleID)	38	0.14
GAS6	ENSG00000183087	Cardiometabolic	Q14393	OID20318	NPC1	0.574162	1.15559e-08	4.52896e-07	Significant	0.879515	0.853379	NPX ~ NPC1 * Age_c + Sex + Error(SampleID)	39	0.13
MRC1	ENSG00000260314	Inflammation_II	P22897	OID30694	NPC1	0.571707	1.23705e-08	4.7827e-07	Significant	1.04484	1.01267	NPX ~ NPC1 * Age_c + Sex + Error(SampleID)	39	0.18
RBP5	ENSG00000139194	Oncology	P82980	OID21369	NPC1	0.588491	1.27159e-08	4.83249e-07	Significant	1.50237	1.57426	NPX ~ NPC1 * Age_c + Sex + Error(SampleID)	37	0.41
SIGLEC10	ENSG00000142512	Inflammation	Q96LC7	OID20537	NPC1	0.573525	1.3006e-08	4.83249e-07	Significant	1.03183	1.07132	NPX ~ NPC1 * Age_c + Sex + Error(SampleID)	37	0.21
NHLRC3	ENSG00000188811	Inflammation_II	Q5JS37	OID30614	NPC1	0.569687	1.28743e-08	4.83249e-07	Significant	0.509414	0.570998	NPX ~ NPC1 * Age_c + Sex + Error(SampleID)	39	0.06
TIMP4	ENSG00000157150	Neurology	Q99727	OID21147	NPC1	0.56826	1.3348e-08	4.89598e-07	Significant	-0.703955	-0.90688	NPX ~ NPC1 * Age_c + Sex + Error(SampleID)	39	0.15
PCDH17	ENSG00000118946	Cardiometabolic	O14917	OID20132	NPC1	0.567763	1.49035e-08	5.39734e-07	Significant	1.10272	1.14943	NPX ~ NPC1 * Age_c + Sex + Error(SampleID)	39	0.24
CD86	ENSG00000114013	Oncology_II	P42081	OID31500	NPC1	0.563594	1.57953e-08	5.64878e-07	Significant	0.602122	0.757459	NPX ~ NPC1 * Age_c + Sex + Error(SampleID)	39	0.10
PCDH1	ENSG00000156453	Inflammation	Q08174	OID20614	NPC1	0.581524	1.6499e-08	5.82762e-07	Significant	0.276265	0.260176	NPX ~ NPC1 * Age_c + Sex + Error(SampleID)	37	0.01
ERN1	ENSG00000178607	Oncology_II	O75460	OID31391	NPC1	0.565495	1.69202e-08	5.89341e-07	Significant	-1.16838	-1.11176	NPX ~ NPC1 * Age_c + Sex + Error(SampleID)	39	0.22
CD27	ENSG00000139193	Oncology	P26842	OID21527	NPC1	0.563506	1.70973e-08	5.89341e-07	Significant	0.709414	0.706809	NPX ~ NPC1 * Age_c + Sex + Error(SampleID)	39	0.09
ZP4	ENSG00000116996	Oncology_II	Q12836	OID31185	Sex	0.649079	2.10619e-10	6.0258e-07	Significant	1.85897	-2.06229	NPX ~ NPC1 * Age_c + Sex + Error(SampleID)		2.46
KITLG	ENSG00000049130	Cardiometabolic	P21583	OID20196	NPC1	0.564652	1.80333e-08	6.14206e-07	Significant	-0.895607	-0.925849	NPX ~ NPC1 * Age_c + Sex + Error(SampleID)	39	0.16
CHIT1	ENSG00000133063	Cardiometabolic	Q13231	OID20312	NPC1	0.561343	1.97856e-08	6.65959e-07	Significant	4.42006	4.42896	NPX ~ NPC1 * Age_c + Sex + Error(SampleID)	39	3.62
CD274	ENSG00000120217	Neurology	Q9NZQ7	OID20966	NPC1	0.556378	2.06578e-08	6.87233e-07	Significant	0.661706	0.645438	NPX ~ NPC1 * Age_c + Sex + Error(SampleID)	38	0.08
SFRP1	ENSG00000104332	Neurology	Q8N474	OID20984	NPC1	0.555708	2.18136e-08	7.11633e-07	Significant	1.59069	1.37967	NPX ~ NPC1 * Age_c + Sex + Error(SampleID)	38	0.35
SCARB2	ENSG00000138760	Neurology	Q14108	OID20943	NPC1	0.558591	2.19943e-08	7.11633e-07	Significant	1.04937	1.02254	NPX ~ NPC1 * Age_c + Sex + Error(SampleID)	38	0.19
ESAM	ENSG00000149564	Cardiometabolic	Q96AP7	OID20270	NPC1	0.558769	2.21375e-08	7.11633e-07	Significant	-0.697907	-0.700507	NPX ~ NPC1 * Age_c + Sex + Error(SampleID)	39	0.09
CSF1R	ENSG00000182578	Inflammation_II	P07333	OID30681	NPC1	0.556326	2.32354e-08	7.38628e-07	Significant	1.00808	1.17289	NPX ~ NPC1 * Age_c + Sex + Error(SampleID)	39	0.26
NCR1	ENSG00000189430	Inflammation	O76036	OID20566	NPC1	0.555389	2.44426e-08	7.68464e-07	Significant	0.877798	0.901588	NPX ~ NPC1 * Age_c + Sex + Error(SampleID)	37	0.16
TNFRSF10B	ENSG00000120889	Neurology	O14763	OID20981	NPC1	0.561222	2.48121e-08	7.71603e-07	Significant	0.72551	0.782166	NPX ~ NPC1 * Age_c + Sex + Error(SampleID)	38	0.12
IGFBP6	ENSG00000167779	Cardiometabolic	P24592	OID20413	Age_c	0.638449	3.79807e-10	1.08663e-06	Significant	-0.21043	0.0652498	NPX ~ NPC1 * Age_c + Sex + Error(SampleID)		0.07
OTOA	ENSG00000155719	Neurology_II	Q7RTW8	OID30825	NPC1	0.557921	3.61276e-08	1.09096e-06	Significant	1.65592	1.83403	NPX ~ NPC1 * Age_c + Sex + Error(SampleID)	38	0.63
INSR	ENSG00000171105	Inflammation_II	P06213	OID30566	NPC1	0.546664	3.62257e-08	1.09096e-06	Significant	0.601729	0.66573	NPX ~ NPC1 * Age_c + Sex + Error(SampleID)	39	0.09
IL10RB	ENSG00000243646	Inflammation	Q08334	OID20696	NPC1	0.548379	3.5951e-08	1.09096e-06	Significant	0.635991	0.644875	NPX ~ NPC1 * Age_c + Sex + Error(SampleID)	39	0.08
GOT1	ENSG00000120053	Cardiometabolic_II	P17174	OID30417	NPC1	0.544298	4.02426e-08	1.19931e-06	Significant	1.42745	1.55589	NPX ~ NPC1 * Age_c + Sex + Error(SampleID)	39	0.48
NAGK	ENSG00000124357	Cardiometabolic_II	Q9UJ70	OID30271	NPC1	0.548217	4.89584e-08	1.44402e-06	Significant	1.68515	1.90764	NPX ~ NPC1 * Age_c + Sex + Error(SampleID)	38	0.69
PILRB	ENSG00000121716	Cardiometabolic	Q9UKJ0	OID20197	NPC1	0.540898	5.24968e-08	1.53258e-06	Significant	1.43626	1.28915	NPX ~ NPC1 * Age_c + Sex + Error(SampleID)	39	0.34
C1QA	ENSG00000173372	Inflammation	P02745	OID20654	NPC1	0.554631	5.36418e-08	1.55019e-06	Significant	0.655603	0.644737	NPX ~ NPC1 * Age_c + Sex + Error(SampleID)	37	0.08
NOS3	ENSG00000164867	Neurology	P29474	OID20834	NPC1	0.577405	5.72999e-08	1.63935e-06	Significant	1.91004	1.69462	NPX ~ NPC1 * Age_c + Sex + Error(SampleID)	35	0.48
CXCL17	ENSG00000189377	Inflammation	Q6UXB2	OID20622	NPC1	0.55246	5.96284e-08	1.68908e-06	Significant	1.12932	1.1409	NPX ~ NPC1 * Age_c + Sex + Error(SampleID)	37	0.26
FABP1	ENSG00000163586	Inflammation	P07148	OID20778	NPC1	0.53663	6.0379e-08	1.69357e-06	Significant	2.28632	2.3318	NPX ~ NPC1 * Age_c + Sex + Error(SampleID)	39	1.11
MANF	ENSG00000145050	Inflammation	P55145	OID20707	NPC1	0.536677	6.45082e-08	1.7746e-06	Significant	-3.70309	-3.23172	NPX ~ NPC1 * Age_c + Sex + Error(SampleID)	39	2.15
GUSB	ENSG00000169919	Cardiometabolic	P08236	OID20296	NPC1	0.534058	6.39088e-08	1.7746e-06	Significant	-1.2209	-1.16774	NPX ~ NPC1 * Age_c + Sex + Error(SampleID)	39	0.28
OSM	ENSG00000099985	Inflammation	P13725	OID20574	NPC1	0.514925	6.75656e-08	1.841e-06	Significant	-3.04545	-2.98416	NPX ~ NPC1 * Age_c + Sex + Error(SampleID)	37	1.89
RAB6A	ENSG00000175582	Inflammation	P20340	OID20608	NPC1	0.505401	7.07956e-08	1.91081e-06	Significant	-3.10033	-2.82239	NPX ~ NPC1 * Age_c + Sex + Error(SampleID)	37	1.70
SDC4	ENSG00000124145	Cardiometabolic	P31431	OID20216	NPC1	0.528173	8.19524e-08	2.19127e-06	Significant	-1.72084	-1.77748	NPX ~ NPC1 * Age_c + Sex + Error(SampleID)	39	0.66
SIRPA	ENSG00000198053	Cardiometabolic	P78324	OID20304	NPC1	0.528028	8.48876e-08	2.24873e-06	Significant	0.495614	0.507359	NPX ~ NPC1 * Age_c + Sex + Error(SampleID)	39	0.05
VSIR	ENSG00000107738	Cardiometabolic	Q9H7M9	OID20131	NPC1	0.529172	8.74656e-08	2.29577e-06	Significant	-2.43678	-2.17305	NPX ~ NPC1 * Age_c + Sex + Error(SampleID)	39	1.00
RGMA	ENSG00000182175	Neurology	Q96B86	OID21065	NPC1	0.52508	9.05418e-08	2.35491e-06	Significant	-0.729538	-0.758203	NPX ~ NPC1 * Age_c + Sex + Error(SampleID)	39	0.12
RIDA	ENSG00000132541	Inflammation_II	P52758	OID30635	NPC1	0.526461	9.14125e-08	2.35614e-06	Significant	1.72426	1.65781	NPX ~ NPC1 * Age_c + Sex + Error(SampleID)	39	0.58
CCN5	ENSG00000064205	Neurology	O76076	OID21068	Age_c	0.602661	2.4575e-09	2.68192e-06	Significant	-0.830647	0.214955	NPX ~ NPC1 * Age_c + Sex + Error(SampleID)		0.90
MMP3	ENSG00000149968	Neurology	P08254	OID21083	Age_c	0.599947	2.81222e-09	2.68192e-06	Significant	-0.672432	0.174241	NPX ~ NPC1 * Age_c + Sex + Error(SampleID)		0.60
CD22	ENSG00000012124	Inflammation	P20273	OID20637	NPC1	0.537722	1.09511e-07	2.79741e-06	Significant	0.89501	1.05019	NPX ~ NPC1 * Age_c + Sex + Error(SampleID)	37	0.23
F9	ENSG00000101981	Cardiometabolic	P00740	OID20349	NPC1	0.523818	1.10862e-07	2.80687e-06	Significant	1.2578	1.03595	NPX ~ NPC1 * Age_c + Sex + Error(SampleID)	39	0.23
ADAMTSL5	ENSG00000185761	Cardiometabolic_II	Q6ZMM2	OID30355	NPC1	0.530117	1.22875e-07	3.08374e-06	Significant	-1.10427	-1.30532	NPX ~ NPC1 * Age_c + Sex + Error(SampleID)	38	0.35
CLEC1B	ENSG00000165682	Neurology	Q9P126	OID21061	NPC1	0.519975	1.26623e-07	3.15017e-06	Significant	-2.84281	-2.57494	NPX ~ NPC1 * Age_c + Sex + Error(SampleID)	39	1.45
CDH3	ENSG00000062038	Neurology	P22223	OID21008	NPC1	0.516653	1.37195e-07	3.38375e-06	Significant	0.766906	0.764354	NPX ~ NPC1 * Age_c + Sex + Error(SampleID)	39	0.13
HNMT	ENSG00000150540	Neurology	P50135	OID20975	NPC1	0.512665	1.52394e-07	3.70941e-06	Significant	1.29988	1.33943	NPX ~ NPC1 * Age_c + Sex + Error(SampleID)	38	0.40
ICAM2	ENSG00000108622	Cardiometabolic	P13598	OID20248	NPC1	0.512555	1.52992e-07	3.70941e-06	Significant	0.706743	0.741644	NPX ~ NPC1 * Age_c + Sex + Error(SampleID)	39	0.12
KYNU	ENSG00000115919	Inflammation	Q16719	OID20669	NPC1	0.528589	1.56547e-07	3.76371e-06	Significant	0.981111	0.977852	NPX ~ NPC1 * Age_c + Sex + Error(SampleID)	37	0.21
IL1R2	ENSG00000115590	Inflammation	P27930	OID20757	NPC1	0.511704	1.64994e-07	3.93374e-06	Significant	0.371768	0.382057	NPX ~ NPC1 * Age_c + Sex + Error(SampleID)	39	0.03
INSL3	ENSG00000248099	Neurology_II	P51460	OID31129	Sex	0.599773	2.83656e-09	4.0577e-06	Significant	0.360059	1.90943	NPX ~ NPC1 * Age_c + Sex + Error(SampleID)		2.61
ADH4	ENSG00000198099	Cardiometabolic	P08319	OID20117	NPC1	0.561313	1.82472e-07	4.27913e-06	Significant	1.49659	1.52033	NPX ~ NPC1 * Age_c + Sex + Error(SampleID)	32	0.43
SCLY	ENSG00000132330	Oncology	Q96I15	OID21425	NPC1	0.511558	1.81321e-07	4.27913e-06	Significant	0.919298	1.01898	NPX ~ NPC1 * Age_c + Sex + Error(SampleID)	38	0.24
NTF3	ENSG00000185652	Inflammation	P20783	OID20591	NPC1	0.499666	2.02655e-07	4.71378e-06	Significant	-0.828207	-0.825346	NPX ~ NPC1 * Age_c + Sex + Error(SampleID)	37	0.16
PLXNB2	ENSG00000196576	Cardiometabolic	O15031	OID20317	NPC1	0.502217	2.47876e-07	5.71915e-06	Significant	0.479257	0.496545	NPX ~ NPC1 * Age_c + Sex + Error(SampleID)	39	0.06
IGFBP7	ENSG00000163453	Cardiometabolic	Q16270	OID20236	NPC1	0.499657	2.61626e-07	5.9881e-06	Significant	0.501796	0.517718	NPX ~ NPC1 * Age_c + Sex + Error(SampleID)	39	0.06
FRZB	ENSG00000162998	Neurology	Q92765	OID20968	NPC1	0.493948	2.68961e-07	6.10713e-06	Significant	1.18962	1.05156	NPX ~ NPC1 * Age_c + Sex + Error(SampleID)	38	0.26
PDCD1LG2	ENSG00000197646	Oncology	Q9BQ51	OID21273	NPC1	0.516354	2.71345e-07	6.11273e-06	Significant	0.839088	0.774404	NPX ~ NPC1 * Age_c + Sex + Error(SampleID)	37	0.13
CALCA	ENSG00000110680	Neurology	P01258	OID20983	NPC1	0.502034	2.85465e-07	6.3806e-06	Significant	1.07386	1.34399	NPX ~ NPC1 * Age_c + Sex + Error(SampleID)	38	0.43
GP6	ENSG00000088053	Neurology	Q9HCN6	OID21091	NPC1	0.498605	3.0169e-07	6.63951e-06	Significant	-2.34208	-2.12658	NPX ~ NPC1 * Age_c + Sex + Error(SampleID)	39	1.08
IMPG1	ENSG00000112706	Neurology_II	Q17R60	OID30814	NPC1	0.510373	3.01334e-07	6.63951e-06	Significant	1.50027	1.49843	NPX ~ NPC1 * Age_c + Sex + Error(SampleID)	38	0.52
KRT18	ENSG00000111057	Oncology	P05783	OID21296	NPC1	0.510771	3.36369e-07	7.34619e-06	Significant	1.71934	1.6613	NPX ~ NPC1 * Age_c + Sex + Error(SampleID)	37	0.62
ADH1B	ENSG00000196616	Inflammation_II	P00325	OID30612	NPC1	0.49397	3.44723e-07	7.41544e-06	Significant	1.949	1.98753	NPX ~ NPC1 * Age_c + Sex + Error(SampleID)	39	0.96
NRCAM	ENSG00000091129	Cardiometabolic	Q92823	OID20229	NPC1	0.489074	3.43805e-07	7.41544e-06	Significant	0.397193	0.609135	NPX ~ NPC1 * Age_c + Sex + Error(SampleID)	39	0.09
EDAR	ENSG00000135960	Inflammation	Q9UNE0	OID20525	NPC1	0.464191	3.91858e-07	8.36646e-06	Significant	-2.54315	-2.35984	NPX ~ NPC1 * Age_c + Sex + Error(SampleID)	37	1.41
PTPRR	ENSG00000153233	Neurology_II	Q15256	OID31099	Age_c	0.565845	1.42412e-08	1.0186e-05	Significant	0.628973	-0.136418	NPX ~ NPC1 * Age_c + Sex + Error(SampleID)		0.42
KHK	ENSG00000138030	Cardiometabolic_II	P50053	OID30241	NPC1	0.492018	4.85675e-07	1.02727e-05	Significant	1.34601	1.41195	NPX ~ NPC1 * Age_c + Sex + Error(SampleID)	38	0.47
FN1	ENSG00000115414	Inflammation_II	P02751	OID30787	NPC1	0.483628	4.88322e-07	1.02727e-05	Significant	-1.26054	-1.30352	NPX ~ NPC1 * Age_c + Sex + Error(SampleID)	39	0.43
CD48	ENSG00000117091	Inflammation	P09326	OID20692	NPC1	0.481275	5.31036e-07	1.10897e-05	Significant	0.672537	0.724412	NPX ~ NPC1 * Age_c + Sex + Error(SampleID)	39	0.13
C1QTNF1	ENSG00000173918	Cardiometabolic	Q9BXJ1	OID20367	NPC1	0.477834	6.30128e-07	1.30637e-05	Significant	-1.08466	-1.07109	NPX ~ NPC1 * Age_c + Sex + Error(SampleID)	39	0.30
MASP1	ENSG00000127241	Neurology	P48740	OID20954	NPC1	0.477635	6.57067e-07	1.35242e-05	Significant	0.498477	0.508763	NPX ~ NPC1 * Age_c + Sex + Error(SampleID)	38	0.07
ENTR1	ENSG00000165689	Cardiometabolic_II	Q96C92	OID30231	NPC1	0.479773	7.42301e-07	1.51694e-05	Significant	1.47937	1.73576	NPX ~ NPC1 * Age_c + Sex + Error(SampleID)	38	0.75
CCL7	ENSG00000108688	Inflammation	P80098	OID20523	NPC1	0.454734	7.56267e-07	1.53453e-05	Significant	-2.39705	-2.31613	NPX ~ NPC1 * Age_c + Sex + Error(SampleID)	37	1.46
LY9	ENSG00000122224	Inflammation	Q9HBG7	OID20670	NPC1	0.4866	7.93074e-07	1.59788e-05	Significant	0.637823	0.663666	NPX ~ NPC1 * Age_c + Sex + Error(SampleID)	37	0.11
SDK2	ENSG00000069188	Inflammation_II	Q58EX2	OID30662	NPC1	0.46817	8.11576e-07	1.62372e-05	Significant	0.575202	0.734967	NPX ~ NPC1 * Age_c + Sex + Error(SampleID)	39	0.14
COL9A1	ENSG00000112280	Inflammation	P20849	OID20550	Age_c	0.568365	3.01405e-08	1.72464e-05	Significant	0.13311	-0.29218	NPX ~ NPC1 * Age_c + Sex + Error(SampleID)		2.01
STAB2	ENSG00000136011	Cardiometabolic_II	Q8WWQ8	OID30401	NPC1	0.467562	8.71136e-07	1.73078e-05	Significant	0.558383	0.645296	NPX ~ NPC1 * Age_c + Sex + Error(SampleID)	39	0.11
APP	ENSG00000142192	Neurology	P05067	OID21070	NPC1	0.4673	9.06725e-07	1.77561e-05	Significant	-1.2637	-1.27497	NPX ~ NPC1 * Age_c + Sex + Error(SampleID)	39	0.44
NAGA	ENSG00000198951	Inflammation_II	P17050	OID30509	NPC1	0.468066	9.12012e-07	1.77561e-05	Significant	-1.27547	-1.22406	NPX ~ NPC1 * Age_c + Sex + Error(SampleID)	39	0.40
CD79B	ENSG00000007312	Inflammation	P40259	OID20635	NPC1	0.48283	9.12318e-07	1.77561e-05	Significant	0.960845	1.02276	NPX ~ NPC1 * Age_c + Sex + Error(SampleID)	37	0.27
SELP	ENSG00000174175	Cardiometabolic	P16109	OID20379	NPC1	0.468229	9.42113e-07	1.82121e-05	Significant	-1.46218	-1.37218	NPX ~ NPC1 * Age_c + Sex + Error(SampleID)	39	0.51
CASP2	ENSG00000106144	Inflammation	P42575	OID20555	NPC1	0.441454	9.6579e-07	1.85445e-05	Significant	-3.25897	-3.06729	NPX ~ NPC1 * Age_c + Sex + Error(SampleID)	37	2.62
LRRC25	ENSG00000175489	Oncology	Q8N386	OID21333	NPC1	0.481982	9.87096e-07	1.88272e-05	Significant	0.957789	0.909575	NPX ~ NPC1 * Age_c + Sex + Error(SampleID)	37	0.21
LILRB4	ENSG00000186818	Inflammation	Q8NHJ6	OID20429	NPC1	0.488972	1.04229e-06	1.9661e-05	Significant	1.55709	1.30311	NPX ~ NPC1 * Age_c + Sex + Error(SampleID)	36	0.37
FASLG	ENSG00000117560	Inflammation	P48023	OID20665	NPC1	0.479169	1.04455e-06	1.9661e-05	Significant	0.737883	0.869243	NPX ~ NPC1 * Age_c + Sex + Error(SampleID)	37	0.20
FABP3	ENSG00000121769	Cardiometabolic_II	P05413	OID30351	NPC1	0.484733	1.07552e-06	2.01115e-05	Significant	1.86521	1.75157	NPX ~ NPC1 * Age_c + Sex + Error(SampleID)	38	0.79
DBH	ENSG00000123454	Inflammation_II	P09172	OID30703	NPC1	0.463425	1.10153e-06	2.04126e-05	Significant	-3.44437	-3.36243	NPX ~ NPC1 * Age_c + Sex + Error(SampleID)	39	3.10
CXCL8	ENSG00000169429	Cardiometabolic	P10145	OID20153	NPC1	0.465274	1.10589e-06	2.04126e-05	Significant	-3.79599	-3.16706	NPX ~ NPC1 * Age_c + Sex + Error(SampleID)	39	2.75
FTCD	ENSG00000160282	Neurology_II	O95954	OID31137	NPC1	0.46315	1.12264e-06	2.0589e-05	Significant	1.88434	1.88512	NPX ~ NPC1 * Age_c + Sex + Error(SampleID)	39	0.98
CXCL8	ENSG00000169429	Oncology	P10145	OID21430	NPC1	0.453134	1.16528e-06	2.12347e-05	Significant	-3.70215	-3.15005	NPX ~ NPC1 * Age_c + Sex + Error(SampleID)	38	2.74
CXCL8	ENSG00000169429	Neurology	P10145	OID20997	NPC1	0.45271	1.17603e-06	2.12951e-05	Significant	-3.75734	-3.18489	NPX ~ NPC1 * Age_c + Sex + Error(SampleID)	38	2.81
GSN	ENSG00000148180	Inflammation_II	P06396	OID30714	NPC1	0.457491	1.24779e-06	2.24523e-05	Significant	-0.356617	-0.408288	NPX ~ NPC1 * Age_c + Sex + Error(SampleID)	39	0.05
SIGLEC9	ENSG00000129450	Oncology	Q9Y336	OID21390	NPC1	0.458959	1.29448e-06	2.30698e-05	Significant	0.795872	0.827762	NPX ~ NPC1 * Age_c + Sex + Error(SampleID)	38	0.19
PTPRC	ENSG00000081237	Cardiometabolic_II	P08575	OID30380	NPC1	0.456058	1.29823e-06	2.30698e-05	Significant	0.576618	0.675343	NPX ~ NPC1 * Age_c + Sex + Error(SampleID)	39	0.13
C19orf12	ENSG00000131943	Neurology	Q9NSK7	OID20804	NPC1	0.494915	1.31444e-06	2.32136e-05	Significant	1.63083	1.61881	NPX ~ NPC1 * Age_c + Sex + Error(SampleID)	35	0.61
ATP1B1	ENSG00000143153	Cardiometabolic_II	P05026	OID30124	NPC1	0.457998	1.32913e-06	2.33291e-05	Significant	1.21867	1.22522	NPX ~ NPC1 * Age_c + Sex + Error(SampleID)	39	0.42
ANGPTL2	ENSG00000136859	Inflammation	Q9UKU9	OID20726	NPC1	0.457391	1.36039e-06	2.37321e-05	Significant	0.718396	0.686918	NPX ~ NPC1 * Age_c + Sex + Error(SampleID)	39	0.13
MPIG6B	ENSG00000204420	Inflammation	O95866	OID20779	NPC1	0.456658	1.47622e-06	2.55968e-05	Significant	-3.15895	-2.87017	NPX ~ NPC1 * Age_c + Sex + Error(SampleID)	39	2.33
ITGB7	ENSG00000139626	Oncology	P26010	OID21393	NPC1	0.460192	1.57269e-06	2.71052e-05	Significant	0.70796	0.860571	NPX ~ NPC1 * Age_c + Sex + Error(SampleID)	38	0.21
SEMA7A	ENSG00000138623	Cardiometabolic	O75326	OID20283	NPC1	0.450758	1.68275e-06	2.88284e-05	Significant	0.617126	0.690724	NPX ~ NPC1 * Age_c + Sex + Error(SampleID)	39	0.14
NRP1	ENSG00000099250	Cardiometabolic	O14786	OID20390	NPC1	0.448573	1.91999e-06	3.2697e-05	Significant	0.488452	0.47373	NPX ~ NPC1 * Age_c + Sex + Error(SampleID)	39	0.07
SLMAP	ENSG00000163681	Oncology_II	Q14BN4	OID31441	NPC1	0.449733	1.93303e-06	3.27243e-05	Significant	-3.69348	-3.26087	NPX ~ NPC1 * Age_c + Sex + Error(SampleID)	39	3.10
GCNT1	ENSG00000187210	Oncology	Q02742	OID21379	NPC1	0.463013	1.9638e-06	3.30495e-05	Significant	0.72181	0.708544	NPX ~ NPC1 * Age_c + Sex + Error(SampleID)	37	0.14
DBN1	ENSG00000113758	Inflammation_II	Q16643	OID30549	NPC1	0.445529	2.03083e-06	3.39778e-05	Significant	-1.19365	-1.25417	NPX ~ NPC1 * Age_c + Sex + Error(SampleID)	39	0.46
CNTNAP2	ENSG00000174469	Inflammation	Q9UHC6	OID20556	NPC1	0.455783	2.08741e-06	3.47215e-05	Significant	1.16949	1.18038	NPX ~ NPC1 * Age_c + Sex + Error(SampleID)	37	0.42
ADGRG2	ENSG00000173698	Cardiometabolic	Q8IZP9	OID20189	Age_c	0.524433	8.71468e-08	4.15545e-05	Significant	-0.211318	-0.0731802	NPX ~ NPC1 * Age_c + Sex + Error(SampleID)		0.14
MESD	ENSG00000117899	Neurology	Q14696	OID21099	NPC1	0.441416	2.54393e-06	4.20705e-05	Significant	-2.09434	-1.90942	NPX ~ NPC1 * Age_c + Sex + Error(SampleID)	39	1.10
CXCL8	ENSG00000169429	Inflammation	P10145	OID20631	NPC1	0.451962	2.69947e-06	4.4172e-05	Significant	-3.36295	-2.90728	NPX ~ NPC1 * Age_c + Sex + Error(SampleID)	37	2.48
PCBD1	ENSG00000166228	Inflammation_II	P61457	OID30610	NPC1	0.436927	2.70189e-06	4.4172e-05	Significant	0.860576	0.888072	NPX ~ NPC1 * Age_c + Sex + Error(SampleID)	39	0.24
FKBP1B	ENSG00000119782	Inflammation	P68106	OID20618	NPC1	0.44749	3.14802e-06	5.11731e-05	Significant	-4.02718	-3.56251	NPX ~ NPC1 * Age_c + Sex + Error(SampleID)	37	3.80
MEGF11	ENSG00000157890	Cardiometabolic_II	A6BM72	OID30099	Age_c	0.511491	1.48803e-07	5.32155e-05	Significant	0.199135	-0.0793148	NPX ~ NPC1 * Age_c + Sex + Error(SampleID)		0.18
NRCAM	ENSG00000091129	Cardiometabolic	Q92823	OID20229	Age_c	0.513805	1.35365e-07	5.32155e-05	Significant	0.397193	-0.0567552	NPX ~ NPC1 * Age_c + Sex + Error(SampleID)		0.09
COL2A1	ENSG00000139219	Cardiometabolic_II	P02458	OID30286	Age_c	0.51779	1.67494e-07	5.32444e-05	Significant	-0.542329	-0.183801	NPX ~ NPC1 * Age_c + Sex + Error(SampleID)		0.90
MMP12	ENSG00000262406	Oncology	P39900	OID21439	NPC1	0.435688	3.38899e-06	5.4167e-05	Significant	1.15166	1.29806	NPX ~ NPC1 * Age_c + Sex + Error(SampleID)	38	0.53
CTSD	ENSG00000117984	Cardiometabolic	P07339	OID20358	NPC1	0.431937	3.36297e-06	5.4167e-05	Significant	0.697542	0.760794	NPX ~ NPC1 * Age_c + Sex + Error(SampleID)	39	0.18
CXCL16	ENSG00000161921	Cardiometabolic	Q9H2A7	OID20282	NPC1	0.43131	3.38388e-06	5.4167e-05	Significant	0.612493	0.58157	NPX ~ NPC1 * Age_c + Sex + Error(SampleID)	39	0.11
CD69	ENSG00000110848	Cardiometabolic	Q07108	OID20206	NPC1	0.432469	3.46286e-06	5.50402e-05	Significant	-2.41713	-2.25465	NPX ~ NPC1 * Age_c + Sex + Error(SampleID)	39	1.58
VEGFC	ENSG00000150630	Oncology	P49767	OID21524	NPC1	0.429542	3.62154e-06	5.72443e-05	Significant	-1.00339	-1.03309	NPX ~ NPC1 * Age_c + Sex + Error(SampleID)	39	0.33
PLAU	ENSG00000122861	Neurology	P00749	OID21124	NPC1	0.425495	3.85176e-06	6.05489e-05	Significant	0.506247	0.595866	NPX ~ NPC1 * Age_c + Sex + Error(SampleID)	39	0.11
PDGFB	ENSG00000100311	Inflammation	P01127	OID20741	NPC1	0.426328	3.95487e-06	6.183e-05	Significant	-1.37694	-1.42876	NPX ~ NPC1 * Age_c + Sex + Error(SampleID)	39	0.65
KIAA0319	ENSG00000137261	Neurology_II	Q5VV43	OID31094	NPC1	0.422049	4.08392e-06	6.35005e-05	Significant	0.681706	0.942699	NPX ~ NPC1 * Age_c + Sex + Error(SampleID)	39	0.28
MTPN	ENSG00000105887	Cardiometabolic	P58546	OID20080	NPC1	0.4599	4.18375e-06	6.47012e-05	Significant	-1.50919	-1.36805	NPX ~ NPC1 * Age_c + Sex + Error(SampleID)	32	0.49
ANGPT1	ENSG00000154188	Inflammation	Q15389	OID20740	NPC1	0.425057	4.30518e-06	6.61133e-05	Significant	-1.50588	-1.45086	NPX ~ NPC1 * Age_c + Sex + Error(SampleID)	39	0.67
OSCAR	ENSG00000170909	Inflammation	Q8IYS5	OID20776	NPC1	0.424775	4.32128e-06	6.61133e-05	Significant	0.733753	0.701599	NPX ~ NPC1 * Age_c + Sex + Error(SampleID)	39	0.16
CLEC4C	ENSG00000198178	Inflammation	Q8WTT0	OID20547	NPC1	0.440396	4.46785e-06	6.79922e-05	Significant	-0.744767	-0.873796	NPX ~ NPC1 * Age_c + Sex + Error(SampleID)	37	0.25
NELL2	ENSG00000184613	Inflammation	Q99435	OID20706	Age_c	0.497531	2.61041e-07	7.4684e-05	Significant	0.0336325	-0.0833145	NPX ~ NPC1 * Age_c + Sex + Error(SampleID)		0.21
ADGRG1	ENSG00000205336	Oncology	Q9Y653	OID21294	NPC1	0.4351	5.04718e-06	7.62839e-05	Significant	1.43903	1.41063	NPX ~ NPC1 * Age_c + Sex + Error(SampleID)	37	0.61
CPXM2	ENSG00000121898	Cardiometabolic_II	Q8N436	OID30322	NPC1	0.431469	5.06604e-06	7.62839e-05	Significant	0.697339	0.826686	NPX ~ NPC1 * Age_c + Sex + Error(SampleID)	38	0.21
ICAM1	ENSG00000090339	Cardiometabolic	P05362	OID20411	NPC1	0.4159	5.39887e-06	8.087e-05	Significant	0.477372	0.571099	NPX ~ NPC1 * Age_c + Sex + Error(SampleID)	39	0.11
CPB1	ENSG00000153002	Cardiometabolic	P15086	OID20289	NPC1	0.418483	5.45121e-06	8.12287e-05	Significant	1.04787	0.951617	NPX ~ NPC1 * Age_c + Sex + Error(SampleID)	39	0.30
CD36	ENSG00000135218	Inflammation_II	P16671	OID30485	NPC1	0.4176	5.75894e-06	8.53695e-05	Significant	-0.899417	-0.855872	NPX ~ NPC1 * Age_c + Sex + Error(SampleID)	39	0.24
SOST	ENSG00000167941	Cardiometabolic	Q9BQB4	OID20204	NPC1	0.412409	6.38304e-06	9.41334e-05	Significant	0.708918	0.775597	NPX ~ NPC1 * Age_c + Sex + Error(SampleID)	39	0.20
CLEC10A	ENSG00000132514	Neurology	Q8IUN9	OID20928	NPC1	0.409619	6.44993e-06	9.4632e-05	Significant	-0.697242	-0.704532	NPX ~ NPC1 * Age_c + Sex + Error(SampleID)	38	0.17
BIN2	ENSG00000110934	Neurology	Q9UBW5	OID21067	NPC1	0.414392	6.74407e-06	9.84428e-05	Significant	-3.6212	-3.10343	NPX ~ NPC1 * Age_c + Sex + Error(SampleID)	39	3.25
NOTCH1	ENSG00000148400	Cardiometabolic	P46531	OID20311	NPC1	0.40958	6.97825e-06	0.000101344	Significant	0.289052	0.339279	NPX ~ NPC1 * Age_c + Sex + Error(SampleID)	39	0.04
MME	ENSG00000196549	Oncology	P08473	OID21307	NPC1	0.424315	7.2771e-06	0.00010515	Significant	-1.25508	-1.19091	NPX ~ NPC1 * Age_c + Sex + Error(SampleID)	37	0.45
CD5L	ENSG00000073754	Inflammation_II	O43866	OID30775	NPC1	0.408334	7.4044e-06	0.00010592	Significant	1.11844	1.1688	NPX ~ NPC1 * Age_c + Sex + Error(SampleID)	39	0.47
GALNT3	ENSG00000115339	Inflammation	Q14435	OID20471	NPC1	0.431889	7.40082e-06	0.00010592	Significant	0.928364	1.10977	NPX ~ NPC1 * Age_c + Sex + Error(SampleID)	36	0.33
PDLIM7	ENSG00000196923	Inflammation	Q9NR12	OID20729	NPC1	0.411345	7.44331e-06	0.000105947	Significant	-4.28672	-3.73818	NPX ~ NPC1 * Age_c + Sex + Error(SampleID)	39	4.77
CCN5	ENSG00000064205	Neurology	O76076	OID21068	NPC1	0.401972	7.52344e-06	0.000106557	Significant	-0.830647	-1.62185	NPX ~ NPC1 * Age_c + Sex + Error(SampleID)	39	0.90
NRP2	ENSG00000118257	Neurology	O60462	OID21081	NPC1	0.405603	7.77796e-06	0.000109304	Significant	0.588948	0.660464	NPX ~ NPC1 * Age_c + Sex + Error(SampleID)	39	0.15
IGFBP6	ENSG00000167779	Cardiometabolic	P24592	OID20413	NPC1	0.40026	7.79381e-06	0.000109304	Significant	-0.21043	-0.455285	NPX ~ NPC1 * Age_c + Sex + Error(SampleID)	39	0.07
MATN3	ENSG00000132031	Neurology	O15232	OID20979	Age_c	0.49075	4.8396e-07	0.000115999	Significant	-0.170229	-0.181271	NPX ~ NPC1 * Age_c + Sex + Error(SampleID)		1.03
SLITRK1	ENSG00000178235	Inflammation_II	Q96PX8	OID30510	Age_c	0.481622	4.8654e-07	0.000115999	Significant	0.325596	-0.109528	NPX ~ NPC1 * Age_c + Sex + Error(SampleID)		0.38
PTPRN2	ENSG00000155093	Neurology	Q92932	OID20912	Age_c	0.486092	5.77854e-07	0.000127172	Significant	0.664703	-0.0976903	NPX ~ NPC1 * Age_c + Sex + Error(SampleID)		0.31
PDGFA	ENSG00000197461	Cardiometabolic	P04085	OID20313	NPC1	0.401337	9.43549e-06	0.000131043	Significant	-1.26351	-1.27718	NPX ~ NPC1 * Age_c + Sex + Error(SampleID)	39	0.57
SPARCL1	ENSG00000152583	Cardiometabolic	Q14515	OID20361	NPC1	0.405192	9.42624e-06	0.000131043	Significant	-0.532249	-0.455656	NPX ~ NPC1 * Age_c + Sex + Error(SampleID)	39	0.07
CBS	ENSG00000160200	Cardiometabolic_II	P35520	OID30200	NPC1	0.407847	9.7073e-06	0.000134167	Significant	2.00477	2.01171	NPX ~ NPC1 * Age_c + Sex + Error(SampleID)	38	1.35
PCYT2	ENSG00000185813	Oncology_II	Q99447	OID31519	NPC1	0.399292	1.02434e-05	0.000140895	Significant	1.33735	1.36618	NPX ~ NPC1 * Age_c + Sex + Error(SampleID)	39	0.66
DKK1	ENSG00000107984	Neurology	O94907	OID21066	NPC1	0.39922	1.03601e-05	0.000141145	Significant	-0.957889	-0.980657	NPX ~ NPC1 * Age_c + Sex + Error(SampleID)	39	0.34
LAMP3	ENSG00000078081	Inflammation	Q9UQV4	OID20638	NPC1	0.412892	1.03116e-05	0.000141145	Significant	0.775347	0.779937	NPX ~ NPC1 * Age_c + Sex + Error(SampleID)	37	0.21
SLITRK2	ENSG00000185985	Oncology	Q9H156	OID21409	NPC1	0.390536	1.0463e-05	0.000141871	Significant	0.890737	0.776351	NPX ~ NPC1 * Age_c + Sex + Error(SampleID)	38	0.22
FGFBP3	ENSG00000174721	Neurology_II	Q8TAT2	OID31108	NPC1	0.398116	1.05888e-05	0.000142898	Significant	0.909656	0.87348	NPX ~ NPC1 * Age_c + Sex + Error(SampleID)	39	0.27
SPINT3	ENSG00000101446	Oncology_II	P49223	OID31509	Sex	0.511319	1.49852e-07	0.000142909	Significant	0.662053	2.29004	NPX ~ NPC1 * Age_c + Sex + Error(SampleID)		5.37
RTBDN	ENSG00000132026	Oncology	Q9BSG5	OID21343	Age_c	0.489519	7.18923e-07	0.000146917	Significant	0.534095	-0.0940489	NPX ~ NPC1 * Age_c + Sex + Error(SampleID)		0.29
DCXR	ENSG00000169738	Oncology	Q7Z4W1	OID21480	NPC1	0.397814	1.14201e-05	0.000153394	Significant	0.939919	0.869476	NPX ~ NPC1 * Age_c + Sex + Error(SampleID)	39	0.27
SMTN	ENSG00000183963	Neurology_II	P53814	OID31154	NPC1	0.398131	1.16915e-05	0.000154859	Significant	-4.08476	-3.49653	NPX ~ NPC1 * Age_c + Sex + Error(SampleID)	39	4.41
STX8	ENSG00000170310	Inflammation	Q9UNK0	OID20531	NPC1	0.365027	1.16718e-05	0.000154859	Significant	-2.16844	-1.98456	NPX ~ NPC1 * Age_c + Sex + Error(SampleID)	37	1.47
MILR1	ENSG00000271605	Inflammation	Q7Z6M3	OID20482	NPC1	0.417942	1.16312e-05	0.000154859	Significant	1.45391	1.39554	NPX ~ NPC1 * Age_c + Sex + Error(SampleID)	36	0.56
SIGLEC1	ENSG00000088827	Inflammation	Q9BZZ2	OID20690	NPC1	0.394229	1.22606e-05	0.000161647	Significant	1.27331	1.23407	NPX ~ NPC1 * Age_c + Sex + Error(SampleID)	39	0.55
TNFRSF6B	ENSG00000243509	Neurology	O95407	OID20964	NPC1	0.387889	1.26487e-05	0.000165999	Significant	1.14582	1.05017	NPX ~ NPC1 * Age_c + Sex + Error(SampleID)	38	0.40
FCRL1	ENSG00000163534	Cardiometabolic	Q96LA6	OID20172	NPC1	0.389998	1.35617e-05	0.000177169	Significant	0.681102	0.827509	NPX ~ NPC1 * Age_c + Sex + Error(SampleID)	39	0.25
GFAP	ENSG00000131095	Oncology	P14136	OID21247	NPC1	0.411836	1.40927e-05	0.000183269	Significant	1.19931	1.18061	NPX ~ NPC1 * Age_c + Sex + Error(SampleID)	36	0.47
SYT1	ENSG00000067715	Neurology_II	P21579	OID31089	NPC1	0.386573	1.42958e-05	0.000185069	Significant	1.03848	1.22064	NPX ~ NPC1 * Age_c + Sex + Error(SampleID)	39	0.55
GSTA1	ENSG00000243955	Cardiometabolic	P08263	OID20166	NPC1	0.389016	1.49879e-05	0.000193155	Significant	1.72992	1.75064	NPX ~ NPC1 * Age_c + Sex + Error(SampleID)	39	1.14
SCARF1	ENSG00000074660	Cardiometabolic	Q14162	OID20297	NPC1	0.388627	1.54797e-05	0.00019477	Significant	-1.1654	-1.03671	NPX ~ NPC1 * Age_c + Sex + Error(SampleID)	39	0.40
BAG3	ENSG00000151929	Neurology	O95817	OID20972	NPC1	0.389815	1.53169e-05	0.00019477	Significant	-0.699653	-0.805477	NPX ~ NPC1 * Age_c + Sex + Error(SampleID)	38	0.24
PCDH9	ENSG00000184226	Oncology_II	Q9HC56	OID31516	NPC1	0.386158	1.53248e-05	0.00019477	Significant	0.640081	0.694552	NPX ~ NPC1 * Age_c + Sex + Error(SampleID)	39	0.18
MDK	ENSG00000110492	Oncology	P21741	OID21489	NPC1	0.386684	1.55217e-05	0.00019477	Significant	0.686104	0.680626	NPX ~ NPC1 * Age_c + Sex + Error(SampleID)	39	0.17
TNFRSF1B	ENSG00000028137	Neurology	P20333	OID21145	NPC1	0.387591	1.54362e-05	0.00019477	Significant	0.654643	0.626245	NPX ~ NPC1 * Age_c + Sex + Error(SampleID)	39	0.15
TNFRSF4	ENSG00000186827	Inflammation	P43489	OID20653	NPC1	0.40054	1.54518e-05	0.00019477	Significant	0.490398	0.611691	NPX ~ NPC1 * Age_c + Sex + Error(SampleID)	37	0.14
PTN	ENSG00000105894	Cardiometabolic	P21246	OID20083	NPC1	0.439888	1.57657e-05	0.000196968	Significant	1.81311	1.89493	NPX ~ NPC1 * Age_c + Sex + Error(SampleID)	32	1.13
CDH2	ENSG00000170558	Cardiometabolic	P19022	OID20170	NPC1	0.383456	1.63693e-05	0.00020362	Significant	0.708753	0.827969	NPX ~ NPC1 * Age_c + Sex + Error(SampleID)	39	0.26
MMP3	ENSG00000149968	Neurology	P08254	OID21083	NPC1	0.377054	1.68872e-05	0.000209152	Significant	-0.672432	-1.25655	NPX ~ NPC1 * Age_c + Sex + Error(SampleID)	39	0.60
SPINK2	ENSG00000128040	Inflammation_II	P20155	OID30627	NPC1	0.383128	1.70973e-05	0.000210842	Significant	0.671447	0.661907	NPX ~ NPC1 * Age_c + Sex + Error(SampleID)	39	0.17
KLK4	ENSG00000167749	Oncology	Q9Y5K2	OID21391	Age_c	0.463997	1.31321e-06	0.000221005	Significant	0.0015037	-0.247786	NPX ~ NPC1 * Age_c + Sex + Error(SampleID)		2.14
CYTL1	ENSG00000170891	Cardiometabolic_II	Q9NRR1	OID30374	Age_c	0.457494	1.20929e-06	0.000221005	Significant	0.125316	-0.0761629	NPX ~ NPC1 * Age_c + Sex + Error(SampleID)		0.20
SEZ6L2	ENSG00000174938	Oncology	Q6UXD5	OID21289	Age_c	0.474038	1.26774e-06	0.000221005	Significant	0.149486	-0.0583299	NPX ~ NPC1 * Age_c + Sex + Error(SampleID)		0.12
FOLR2	ENSG00000165457	Neurology	P14207	OID21062	NPC1	0.383096	1.81156e-05	0.000222441	Significant	0.708772	0.637144	NPX ~ NPC1 * Age_c + Sex + Error(SampleID)	39	0.16
ITGA6	ENSG00000091409	Inflammation	P23229	OID20528	NPC1	0.354279	1.84193e-05	0.000225204	Significant	-0.570062	-0.519064	NPX ~ NPC1 * Age_c + Sex + Error(SampleID)	37	0.11
DLL1	ENSG00000198719	Oncology	O00548	OID21525	NPC1	0.381537	1.89883e-05	0.000231172	Significant	0.537688	0.519122	NPX ~ NPC1 * Age_c + Sex + Error(SampleID)	39	0.10
SNAP25	ENSG00000132639	Neurology_II	P60880	OID30811	Age_c	0.460752	1.47747e-06	0.000234836	Significant	-0.00686689	-0.106308	NPX ~ NPC1 * Age_c + Sex + Error(SampleID)		0.39
PPBP	ENSG00000163736	Inflammation_II	P02775	OID30761	NPC1	0.379675	1.95164e-05	0.000236594	Significant	-1.77182	-1.74162	NPX ~ NPC1 * Age_c + Sex + Error(SampleID)	39	1.17
LEO1	ENSG00000166477	Neurology_II	Q8WVC0	OID30991	NPC1	0.378964	1.9647e-05	0.000237173	Significant	0.818418	0.868926	NPX ~ NPC1 * Age_c + Sex + Error(SampleID)	39	0.29
SCG3	ENSG00000104112	Inflammation	Q8WXD2	OID20728	Age_c	0.44951	1.62072e-06	0.000244047	Significant	0.40279	-0.0904605	NPX ~ NPC1 * Age_c + Sex + Error(SampleID)		0.30
CLEC7A	ENSG00000172243	Inflammation	Q9BXN2	OID20636	NPC1	0.39095	2.04773e-05	0.000246158	Significant	0.882731	0.786654	NPX ~ NPC1 * Age_c + Sex + Error(SampleID)	37	0.23
SEMA4C	ENSG00000168758	Oncology	Q9C0C4	OID21329	NPC1	0.391177	2.10766e-05	0.000252301	Significant	1.33034	1.41258	NPX ~ NPC1 * Age_c + Sex + Error(SampleID)	37	0.73
MFAP5	ENSG00000197614	Cardiometabolic	Q13361	OID20239	Age_c	0.446978	1.77699e-06	0.000254198	Significant	-0.321366	0.0939332	NPX ~ NPC1 * Age_c + Sex + Error(SampleID)		0.32
VSNL1	ENSG00000163032	Neurology_II	P62760	OID31105	NPC1	0.377187	2.13443e-05	0.000254441	Significant	0.788686	0.810902	NPX ~ NPC1 * Age_c + Sex + Error(SampleID)	39	0.26
CD63	ENSG00000135404	Neurology	P08962	OID20988	NPC1	0.381851	2.25775e-05	0.000268026	Significant	0.74	0.93426	NPX ~ NPC1 * Age_c + Sex + Error(SampleID)	38	0.34
PROK1	ENSG00000143125	Inflammation	P58294	OID20543	Age_c	0.461309	1.99756e-06	0.000272144	Significant	0.472736	0.165985	NPX ~ NPC1 * Age_c + Sex + Error(SampleID)		1.00
PLIN1	ENSG00000166819	Neurology	O60240	OID20835	NPC1	0.406798	2.32016e-05	0.000274297	Significant	-0.954627	-0.991743	NPX ~ NPC1 * Age_c + Sex + Error(SampleID)	35	0.32
ART3	ENSG00000156219	Cardiometabolic	Q13508	OID20346	NPC1	0.371094	2.36493e-05	0.000278439	Significant	-0.504747	-0.610316	NPX ~ NPC1 * Age_c + Sex + Error(SampleID)	39	0.15
PLXNA4	ENSG00000221866	Inflammation	Q9HCM2	OID20597	NPC1	0.353192	2.40999e-05	0.000282581	Significant	-1.33804	-1.2949	NPX ~ NPC1 * Age_c + Sex + Error(SampleID)	37	0.69
GBP4	ENSG00000162654	Neurology	Q96PP9	OID20845	NPC1	0.405182	2.49787e-05	0.000290504	Significant	-2.02643	-1.87429	NPX ~ NPC1 * Age_c + Sex + Error(SampleID)	35	1.17
CCL5	ENSG00000271503	Cardiometabolic	P13501	OID20412	NPC1	0.373849	2.49407e-05	0.000290504	Significant	-1.75898	-1.53134	NPX ~ NPC1 * Age_c + Sex + Error(SampleID)	39	0.93
CD38	ENSG00000004468	Oncology	P28907	OID21316	NPC1	0.385598	2.54707e-05	0.000295027	Significant	0.800234	0.756735	NPX ~ NPC1 * Age_c + Sex + Error(SampleID)	37	0.22
POMC	ENSG00000115138	Cardiometabolic_II	P01189	OID30282	NPC1	0.376893	2.57967e-05	0.000297598	Significant	1.54615	1.72624	NPX ~ NPC1 * Age_c + Sex + Error(SampleID)	38	1.13
PTPRR	ENSG00000153233	Neurology_II	Q15256	OID31099	NPC1	0.365269	2.61753e-05	0.000300754	Significant	0.628973	1.02525	NPX ~ NPC1 * Age_c + Sex + Error(SampleID)	39	0.42
SIAE	ENSG00000110013	Oncology	Q9HAT2	OID21503	NPC1	0.371367	2.65587e-05	0.000303938	Significant	-1.08811	-0.97439	NPX ~ NPC1 * Age_c + Sex + Error(SampleID)	39	0.38
MAP3K5	ENSG00000197442	Oncology	Q99683	OID21253	NPC1	0.390506	2.69775e-05	0.000306281	Significant	-3.76429	-3.39108	NPX ~ NPC1 * Age_c + Sex + Error(SampleID)	36	4.24
SERPINI1	ENSG00000163536	Inflammation_II	Q99574	OID30604	NPC1	0.36966	2.69067e-05	0.000306281	Significant	-0.93239	-0.892961	NPX ~ NPC1 * Age_c + Sex + Error(SampleID)	39	0.32
CD5	ENSG00000110448	Oncology	P06127	OID21449	NPC1	0.37483	2.73001e-05	0.000308718	Significant	0.559452	0.631423	NPX ~ NPC1 * Age_c + Sex + Error(SampleID)	38	0.16
MET	ENSG00000105976	Cardiometabolic	P08581	OID20269	NPC1	0.371401	2.76208e-05	0.000311114	Significant	-0.435893	-0.378682	NPX ~ NPC1 * Age_c + Sex + Error(SampleID)	39	0.06
DPP7	ENSG00000176978	Cardiometabolic	Q9UHL4	OID20142	NPC1	0.368174	2.78381e-05	0.000312333	Significant	-1.2115	-1.20948	NPX ~ NPC1 * Age_c + Sex + Error(SampleID)	39	0.59
PTPRN2	ENSG00000155093	Neurology	Q92932	OID20912	NPC1	0.381458	2.8015e-05	0.00031309	Significant	0.664703	0.866512	NPX ~ NPC1 * Age_c + Sex + Error(SampleID)	38	0.31
ACAN	ENSG00000157766	Cardiometabolic	P16112	OID20159	Age_c	0.437898	2.4639e-06	0.000320419	Significant	-0.242372	-0.0949565	NPX ~ NPC1 * Age_c + Sex + Error(SampleID)		0.34
MMP9	ENSG00000100985	Neurology	P14780	OID21103	NPC1	0.368447	2.88672e-05	0.000321358	Significant	-1.28154	-1.30667	NPX ~ NPC1 * Age_c + Sex + Error(SampleID)	39	0.69
TRIM5	ENSG00000132256	Inflammation	Q9C035	OID20526	NPC1	0.337831	2.93766e-05	0.000325761	Significant	-3.0493	-2.79581	NPX ~ NPC1 * Age_c + Sex + Error(SampleID)	37	3.30
EGF	ENSG00000138798	Inflammation	P01133	OID20698	NPC1	0.367171	3.09211e-05	0.000341565	Significant	-3.6561	-3.27546	NPX ~ NPC1 * Age_c + Sex + Error(SampleID)	39	4.40
CD28	ENSG00000178562	Oncology	P10747	OID21265	NPC1	0.385037	3.2299e-05	0.000355413	Significant	0.989899	1.01115	NPX ~ NPC1 * Age_c + Sex + Error(SampleID)	36	0.39
RNASE10	ENSG00000182545	Cardiometabolic_II	Q5GAN6	OID30238	NPC1	0.369079	3.32538e-05	0.000364518	Significant	1.14331	1.07537	NPX ~ NPC1 * Age_c + Sex + Error(SampleID)	38	0.45
RAB33A	ENSG00000134594	Cardiometabolic_II	Q14088	OID30122	NPC1	0.365637	3.36736e-05	0.000367711	Significant	-3.45206	-2.93713	NPX ~ NPC1 * Age_c + Sex + Error(SampleID)	39	3.58
SLAMF6	ENSG00000162739	Oncology	Q96DU3	OID21254	NPC1	0.382766	3.44058e-05	0.000374104	Significant	1.10378	1.09827	NPX ~ NPC1 * Age_c + Sex + Error(SampleID)	36	0.46
GIPC2	ENSG00000137960	Neurology_II	Q8TF65	OID31153	NPC1	0.361801	3.45206e-05	0.000374104	Significant	1.0552	1.02194	NPX ~ NPC1 * Age_c + Sex + Error(SampleID)	39	0.43
TBC1D23	ENSG00000036054	Oncology	Q9NUY8	OID21286	NPC1	0.375724	3.5031e-05	0.000376781	Significant	-3.18614	-2.74937	NPX ~ NPC1 * Age_c + Sex + Error(SampleID)	37	2.97
PLG	ENSG00000122194	Inflammation_II	P00747	OID30785	NPC1	0.362107	3.49866e-05	0.000376781	Significant	-0.464685	-0.446512	NPX ~ NPC1 * Age_c + Sex + Error(SampleID)	39	0.08
SUOX	ENSG00000139531	Neurology_II	P51687	OID31031	NPC1	0.360713	3.69289e-05	0.000395707	Significant	1.46241	1.42503	NPX ~ NPC1 * Age_c + Sex + Error(SampleID)	39	0.85
ENTPD5	ENSG00000187097	Cardiometabolic	O75356	OID20104	NPC1	0.390282	3.9744e-05	0.000424282	Significant	-0.372782	-0.371935	NPX ~ NPC1 * Age_c + Sex + Error(SampleID)	32	0.05
CA13	ENSG00000185015	Cardiometabolic	Q8N1Q1	OID20225	NPC1	0.359135	4.04677e-05	0.000430402	Significant	-3.57253	-3.10074	NPX ~ NPC1 * Age_c + Sex + Error(SampleID)	39	4.09
UPB1	ENSG00000100024	Cardiometabolic_II	Q9UBR1	OID30352	NPC1	0.377719	4.11801e-05	0.000436357	Significant	1.67204	1.6184	NPX ~ NPC1 * Age_c + Sex + Error(SampleID)	38	1.06
DNMBP	ENSG00000107554	Neurology	Q6XZF7	OID20956	NPC1	0.346057	4.14642e-05	0.000437745	Significant	-2.46326	-2.13398	NPX ~ NPC1 * Age_c + Sex + Error(SampleID)	38	1.95
GSTA3	ENSG00000174156	Oncology	Q16772	OID21242	NPC1	0.376082	4.208e-05	0.000440992	Significant	1.26983	1.40454	NPX ~ NPC1 * Age_c + Sex + Error(SampleID)	36	0.77
ACY1	ENSG00000243989	Cardiometabolic	Q03154	OID20137	NPC1	0.355402	4.20165e-05	0.000440992	Significant	0.759768	0.86042	NPX ~ NPC1 * Age_c + Sex + Error(SampleID)	39	0.32
FKBP14	ENSG00000106080	Neurology_II	Q9NWM8	OID31065	NPC1	0.358915	4.2253e-05	0.000441189	Significant	-1.97634	-1.57766	NPX ~ NPC1 * Age_c + Sex + Error(SampleID)	39	1.07
ATP6AP2	ENSG00000182220	Oncology	O75787	OID21178	NPC1	0.375683	4.29664e-05	0.000447007	Significant	0.58489	0.728201	NPX ~ NPC1 * Age_c + Sex + Error(SampleID)	36	0.21
DOK2	ENSG00000147443	Cardiometabolic	O60496	OID20138	NPC1	0.35682	4.33601e-05	0.000449468	Significant	-2.74866	-2.41743	NPX ~ NPC1 * Age_c + Sex + Error(SampleID)	39	2.51
KAZALD1	ENSG00000107821	Oncology	Q96I82	OID21339	NPC1	0.36814	4.38601e-05	0.00045301	Significant	1.00702	0.992214	NPX ~ NPC1 * Age_c + Sex + Error(SampleID)	37	0.40
SFRP4	ENSG00000106483	Inflammation_II	Q6FHJ7	OID30648	NPC1	0.350547	4.53002e-05	0.000465577	Significant	-0.581631	-0.689327	NPX ~ NPC1 * Age_c + Sex + Error(SampleID)	39	0.21
TLR4	ENSG00000136869	Inflammation_II	O00206	OID30428	NPC1	0.351187	4.5565e-05	0.000465577	Significant	0.501489	0.58415	NPX ~ NPC1 * Age_c + Sex + Error(SampleID)	39	0.15
BTN2A1	ENSG00000112763	Inflammation	Q7KYR7	OID20713	NPC1	0.354424	4.54541e-05	0.000465577	Significant	0.504537	0.45959	NPX ~ NPC1 * Age_c + Sex + Error(SampleID)	39	0.09
FOS	ENSG00000170345	Oncology_II	P01100	OID31221	NPC1	0.354629	4.60714e-05	0.000469076	Significant	-3.86975	-3.55874	NPX ~ NPC1 * Age_c + Sex + Error(SampleID)	39	5.49
CHCHD6	ENSG00000159685	Oncology_II	Q9BRQ6	OID31426	NPC1	0.352094	4.62877e-05	0.000469607	Significant	0.452683	0.483488	NPX ~ NPC1 * Age_c + Sex + Error(SampleID)	39	0.10
SPARC	ENSG00000113140	Oncology	P09486	OID21511	NPC1	0.350882	4.72355e-05	0.000477529	Significant	-0.857163	-0.853851	NPX ~ NPC1 * Age_c + Sex + Error(SampleID)	39	0.32
NCAN	ENSG00000130287	Neurology	O14594	OID21055	Age_c	0.422761	4.20287e-06	0.000501018	Significant	0.0118458	-0.103126	NPX ~ NPC1 * Age_c + Sex + Error(SampleID)		0.43
SMAD5	ENSG00000113658	Oncology	Q99717	OID21353	Age_c	0.440912	4.05451e-06	0.000501018	Significant	0.190266	0.0556691	NPX ~ NPC1 * Age_c + Sex + Error(SampleID)		0.12
CR1	ENSG00000203710	Inflammation_II	P17927	OID30697	NPC1	0.346281	5.03694e-05	0.000507419	Significant	0.472392	0.659752	NPX ~ NPC1 * Age_c + Sex + Error(SampleID)	39	0.19
SRC	ENSG00000197122	Oncology	P12931	OID21521	NPC1	0.351053	5.23244e-05	0.000525264	Significant	-3.04281	-2.63482	NPX ~ NPC1 * Age_c + Sex + Error(SampleID)	39	3.06
CRH	ENSG00000147571	Oncology	P06850	OID21257	NPC1	0.368142	5.27051e-05	0.000527235	Significant	-2.22348	-1.70731	NPX ~ NPC1 * Age_c + Sex + Error(SampleID)	36	1.18
CALB1	ENSG00000104327	Oncology	P05937	OID21306	Age_c	0.437014	4.62905e-06	0.000529748	Significant	1.55527	-0.0808665	NPX ~ NPC1 * Age_c + Sex + Error(SampleID)		0.26
SYTL4	ENSG00000102362	Cardiometabolic_II	Q96C24	OID30339	NPC1	0.378873	5.3571e-05	0.000532175	Significant	-2.64391	-2.1446	NPX ~ NPC1 * Age_c + Sex + Error(SampleID)	38	1.93
CMIP	ENSG00000153815	Oncology_II	Q8IY22	OID31406	NPC1	0.350839	5.34811e-05	0.000532175	Significant	-1.99683	-1.69823	NPX ~ NPC1 * Age_c + Sex + Error(SampleID)	39	1.28
PDCD1	ENSG00000188389	Oncology	Q15116	OID21396	NPC1	0.355496	5.49656e-05	0.000544141	Significant	0.629996	0.839063	NPX ~ NPC1 * Age_c + Sex + Error(SampleID)	38	0.31
MSTN	ENSG00000138379	Cardiometabolic	O14793	OID20115	NPC1	0.413003	5.6093e-05	0.000553386	Significant	-1.30156	-1.37325	NPX ~ NPC1 * Age_c + Sex + Error(SampleID)	32	0.71
TREML1	ENSG00000161911	Inflammation_II	Q86YW5	OID30682	NPC1	0.346219	5.87062e-05	0.000577177	Significant	-2.69613	-2.44194	NPX ~ NPC1 * Age_c + Sex + Error(SampleID)	39	2.67
CILP	ENSG00000138615	Cardiometabolic_II	O75339	OID30399	NPC1	0.341898	6.0732e-05	0.000594737	Significant	-0.901406	-1.04238	NPX ~ NPC1 * Age_c + Sex + Error(SampleID)	39	0.49
NPDC1	ENSG00000107281	Cardiometabolic	Q9NQX5	OID20205	NPC1	0.341093	6.09081e-05	0.000594737	Significant	0.538874	0.622195	NPX ~ NPC1 * Age_c + Sex + Error(SampleID)	39	0.17
CRACR2A	ENSG00000130038	Oncology	Q9BSW2	OID21249	NPC1	0.36331	6.12004e-05	0.000595559	Significant	-3.8778	-3.50138	NPX ~ NPC1 * Age_c + Sex + Error(SampleID)	36	5.07
TNFRSF9	ENSG00000049249	Neurology	Q07011	OID20985	NPC1	0.350539	6.32617e-05	0.000613531	Significant	0.551305	0.728778	NPX ~ NPC1 * Age_c + Sex + Error(SampleID)	38	0.24
GHR	ENSG00000112964	Inflammation_II	P10912	OID30574	NPC1	0.34034	6.43027e-05	0.00062152	Significant	-0.630642	-0.721222	NPX ~ NPC1 * Age_c + Sex + Error(SampleID)	39	0.24
ESYT2	ENSG00000117868	Neurology_II	A0FGR8	OID31134	NPC1	0.344532	6.45301e-05	0.000621619	Significant	-3.58648	-3.03765	NPX ~ NPC1 * Age_c + Sex + Error(SampleID)	39	4.19
C2CD2L	ENSG00000172375	Neurology	O14523	OID20864	NPC1	0.372045	6.74793e-05	0.000647847	Significant	-2.72904	-2.459	NPX ~ NPC1 * Age_c + Sex + Error(SampleID)	35	2.32
RBPMS2	ENSG00000166831	Cardiometabolic_II	Q6ZRY4	OID30257	NPC1	0.346812	6.88318e-05	0.000658622	Significant	-3.86992	-3.32265	NPX ~ NPC1 * Age_c + Sex + Error(SampleID)	38	4.80
IFNGR1	ENSG00000027697	Inflammation	P15260	OID20678	NPC1	0.340262	7.00106e-05	0.000667667	Significant	0.387538	0.356015	NPX ~ NPC1 * Age_c + Sex + Error(SampleID)	39	0.06
IL7	ENSG00000104432	Inflammation	P13232	OID20535	NPC1	0.350604	7.07653e-05	0.000672623	Significant	-1.05225	-1.10245	NPX ~ NPC1 * Age_c + Sex + Error(SampleID)	37	0.58
PTPN1	ENSG00000196396	Neurology	P18031	OID20908	NPC1	0.330188	7.12352e-05	0.000674847	Significant	-2.62444	-2.31359	NPX ~ NPC1 * Age_c + Sex + Error(SampleID)	38	2.48
MIA	ENSG00000261857	Oncology	Q16674	OID21531	Age_c	0.411681	6.16223e-06	0.000678083	Significant	0.108664	-0.0749749	NPX ~ NPC1 * Age_c + Sex + Error(SampleID)		0.24
TWF2	ENSG00000247596	Cardiometabolic_II	Q6IBS0	OID30386	NPC1	0.338626	7.65366e-05	0.000722677	Significant	-1.86701	-1.60564	NPX ~ NPC1 * Age_c + Sex + Error(SampleID)	39	1.20
SLC27A4	ENSG00000167114	Neurology	Q6P1M0	OID20814	NPC1	0.367132	7.68365e-05	0.000723122	Significant	-3.90738	-3.51199	NPX ~ NPC1 * Age_c + Sex + Error(SampleID)	35	4.82
MAP2K6	ENSG00000108984	Inflammation	P52564	OID20552	NPC1	0.301753	7.71496e-05	0.000723688	Significant	-2.99003	-2.77704	NPX ~ NPC1 * Age_c + Sex + Error(SampleID)	37	3.74
ENPP2	ENSG00000136960	Cardiometabolic	Q13822	OID20288	Age_c	0.408538	6.86048e-06	0.000726957	Significant	0.106371	-0.0480487	NPX ~ NPC1 * Age_c + Sex + Error(SampleID)		0.10
HSPB6	ENSG00000004776	Oncology	O14558	OID21408	NPC1	0.335863	7.84017e-05	0.00073303	Significant	-0.742267	-0.806756	NPX ~ NPC1 * Age_c + Sex + Error(SampleID)	38	0.31
IGFBP1	ENSG00000146678	Cardiometabolic	P08833	OID20246	NPC1	0.332097	8.04626e-05	0.000749849	Significant	1.76248	1.98623	NPX ~ NPC1 * Age_c + Sex + Error(SampleID)	39	1.85
KLK13	ENSG00000167759	Oncology	Q9UKR3	OID21291	NPC1	0.347222	8.15626e-05	0.000757631	Significant	0.700321	0.617319	NPX ~ NPC1 * Age_c + Sex + Error(SampleID)	37	0.17
TXNDC5	ENSG00000239264	Neurology	Q8NBS9	OID21012	NPC1	0.335204	8.36748e-05	0.000774737	Significant	-0.900205	-0.80457	NPX ~ NPC1 * Age_c + Sex + Error(SampleID)	39	0.31
FCER2	ENSG00000104921	Neurology	P06734	OID21133	NPC1	0.332353	8.68693e-05	0.000801719	Significant	0.767205	0.821444	NPX ~ NPC1 * Age_c + Sex + Error(SampleID)	39	0.32
CD8A	ENSG00000153563	Neurology	P01732	OID21018	NPC1	0.332758	8.79824e-05	0.000809381	Significant	1.20337	1.2029	NPX ~ NPC1 * Age_c + Sex + Error(SampleID)	39	0.69
PTGDS	ENSG00000107317	Cardiometabolic	P41222	OID20408	NPC1	0.330305	8.94151e-05	0.000819925	Significant	0.396458	0.401832	NPX ~ NPC1 * Age_c + Sex + Error(SampleID)	39	0.08
ADGRF5	ENSG00000069122	Cardiometabolic_II	Q8IZF2	OID30349	NPC1	0.346648	9.05738e-05	0.000827897	Significant	-0.424091	-0.434986	NPX ~ NPC1 * Age_c + Sex + Error(SampleID)	38	0.09
EDDM3B	ENSG00000181552	Oncology_II	P56851	OID31365	Sex	0.455871	1.28387e-06	0.00083456	Significant	0.522518	0.773391	NPX ~ NPC1 * Age_c + Sex + Error(SampleID)		0.77
XG	ENSG00000124343	Cardiometabolic	P55808	OID20259	Sex	0.452398	1.45851e-06	0.00083456	Significant	-0.100012	-0.300699	NPX ~ NPC1 * Age_c + Sex + Error(SampleID)		0.12
GFER	ENSG00000127554	Oncology	P55789	OID21259	NPC1	0.349454	9.25577e-05	0.000843336	Significant	0.905998	0.914072	NPX ~ NPC1 * Age_c + Sex + Error(SampleID)	36	0.37
PDIA3	ENSG00000167004	Inflammation_II	P30101	OID30573	NPC1	0.331551	9.31105e-05	0.00084568	Significant	-0.840762	-0.727157	NPX ~ NPC1 * Age_c + Sex + Error(SampleID)	39	0.25
UNC5D	ENSG00000156687	Inflammation_II	Q6UXZ4	OID30447	Age_c	0.402158	8.51695e-06	0.00087025	Significant	0.31175	-0.0978452	NPX ~ NPC1 * Age_c + Sex + Error(SampleID)		0.42
PLA2G2A	ENSG00000188257	Cardiometabolic	P14555	OID20274	NPC1	0.329138	9.67051e-05	0.000875548	Significant	1.5413	1.37305	NPX ~ NPC1 * Age_c + Sex + Error(SampleID)	39	0.91
NEXN	ENSG00000162614	Inflammation_II	Q0ZGT2	OID30678	NPC1	0.329767	9.74926e-05	0.000877942	Significant	-2.02844	-1.80879	NPX ~ NPC1 * Age_c + Sex + Error(SampleID)	39	1.58
KLRK1	ENSG00000213809	Neurology_II	P26718	OID31082	NPC1	0.328913	9.75832e-05	0.000877942	Significant	0.60672	0.611494	NPX ~ NPC1 * Age_c + Sex + Error(SampleID)	39	0.18
BNIP2	ENSG00000140299	Cardiometabolic_II	Q12982	OID30292	NPC1	0.356037	9.83544e-05	0.000882107	Significant	-2.51351	-2.02554	NPX ~ NPC1 * Age_c + Sex + Error(SampleID)	38	1.88
CXCL9	ENSG00000138755	Inflammation	Q07325	OID20675	NPC1	0.325465	0.000100277	0.000896539	Significant	1.11622	1.29968	NPX ~ NPC1 * Age_c + Sex + Error(SampleID)	39	0.82
AHNAK2	ENSG00000185567	Cardiometabolic_II	Q8IVF2	OID30244	NPC1	0.331744	0.00010206	0.000909635	Significant	-0.479302	-0.61374	NPX ~ NPC1 * Age_c + Sex + Error(SampleID)	38	0.17
SPINT3	ENSG00000101446	Oncology_II	P49223	OID31509	Age_c	0.399663	9.26313e-06	0.000913855	Significant	0.662053	0.348098	NPX ~ NPC1 * Age_c + Sex + Error(SampleID)		5.37
LTA4H	ENSG00000111144	Oncology	P09960	OID21452	NPC1	0.326626	0.000103526	0.000915542	Significant	1.64414	1.65655	NPX ~ NPC1 * Age_c + Sex + Error(SampleID)	38	1.35
KIR2DL2	ENSG00000276011	Oncology_II	P43627	OID31431	NPC1	0.322537	0.000103769	0.000915542	Significant	1.135	1.344	NPX ~ NPC1 * Age_c + Sex + Error(SampleID)	39	0.88
DPP10	ENSG00000175497	Inflammation	Q8N608	OID20527	NPC1	0.338564	0.00010345	0.000915542	Significant	0.716784	0.71906	NPX ~ NPC1 * Age_c + Sex + Error(SampleID)	37	0.26
EPHA4	ENSG00000116106	Inflammation_II	P54764	OID30622	NPC1	0.322137	0.000104002	0.000915542	Significant	0.454426	0.655593	NPX ~ NPC1 * Age_c + Sex + Error(SampleID)	39	0.21
PF4	ENSG00000163737	Inflammation_II	P02776	OID30764	NPC1	0.325382	0.000104645	0.00091837	Significant	-1.86895	-1.84425	NPX ~ NPC1 * Age_c + Sex + Error(SampleID)	39	1.66
VAV3	ENSG00000134215	Neurology_II	Q9UKW4	OID30795	NPC1	0.343224	0.000108088	0.0009428	Significant	-4.33217	-3.69062	NPX ~ NPC1 * Age_c + Sex + Error(SampleID)	38	6.51
TGFA	ENSG00000163235	Inflammation	P01135	OID20600	NPC1	0.306011	0.000108048	0.0009428	Significant	-1.04902	-1.02572	NPX ~ NPC1 * Age_c + Sex + Error(SampleID)	37	0.54
CEACAM21	ENSG00000007129	Inflammation	Q3KPI0	OID20548	NPC1	0.309073	0.000108674	0.000945037	Significant	1.33236	1.33637	NPX ~ NPC1 * Age_c + Sex + Error(SampleID)	37	0.91
FURIN	ENSG00000140564	Oncology	P09958	OID21514	NPC1	0.322323	0.000113351	0.000982716	Significant	-0.456201	-0.499596	NPX ~ NPC1 * Age_c + Sex + Error(SampleID)	39	0.12
PRKG1	ENSG00000185532	Inflammation_II	Q13976	OID30621	NPC1	0.325302	0.000115417	0.000993321	Significant	-3.90208	-3.30675	NPX ~ NPC1 * Age_c + Sex + Error(SampleID)	39	5.42
CD40LG	ENSG00000102245	Inflammation	P29965	OID20616	NPC1	0.333706	0.000115797	0.000993321	Significant	-2.19485	-2.04127	NPX ~ NPC1 * Age_c + Sex + Error(SampleID)	37	2.02
NID2	ENSG00000087303	Neurology	Q14112	OID21085	NPC1	0.322287	0.000115785	0.000993321	Significant	-1.34908	-1.34011	NPX ~ NPC1 * Age_c + Sex + Error(SampleID)	39	0.89
LAT	ENSG00000213658	Inflammation	O43561	OID20640	NPC1	0.333646	0.000115963	0.000993321	Significant	-1.3786	-1.31704	NPX ~ NPC1 * Age_c + Sex + Error(SampleID)	37	0.84
MOG	ENSG00000204655	Oncology	Q16653	OID21384	NPC1	0.336096	0.000117904	0.00100694	Significant	0.470094	0.572748	NPX ~ NPC1 * Age_c + Sex + Error(SampleID)	38	0.16
KIAA0319	ENSG00000137261	Neurology_II	Q5VV43	OID31094	Age_c	0.394413	1.10426e-05	0.00101913	Significant	0.681706	-0.0789313	NPX ~ NPC1 * Age_c + Sex + Error(SampleID)		0.28
EPHA1	ENSG00000146904	Inflammation	P21709	OID20677	Age_c	0.394896	1.08663e-05	0.00101913	Significant	0.302912	0.0478913	NPX ~ NPC1 * Age_c + Sex + Error(SampleID)		0.10
CFHR5	ENSG00000134389	Inflammation_II	Q9BXR6	OID30716	NPC1	0.317777	0.000121528	0.0010348	Significant	-0.380867	-0.487931	NPX ~ NPC1 * Age_c + Sex + Error(SampleID)	39	0.12
SUSD1	ENSG00000106868	Cardiometabolic	Q6UWL2	OID20072	NPC1	0.339022	0.000126495	0.0010739	Significant	-1.41833	-1.29308	NPX ~ NPC1 * Age_c + Sex + Error(SampleID)	32	0.71
ALDH1A1	ENSG00000165092	Neurology	P00352	OID21128	NPC1	0.319188	0.000127664	0.00108061	Significant	1.40379	1.34721	NPX ~ NPC1 * Age_c + Sex + Error(SampleID)	39	0.91
MINDY1	ENSG00000143409	Oncology_II	Q8N5J2	OID31399	NPC1	0.321462	0.000128819	0.00108082	Significant	-3.52702	-3.06944	NPX ~ NPC1 * Age_c + Sex + Error(SampleID)	39	4.75
DKK4	ENSG00000104371	Neurology	Q9UBT3	OID20934	NPC1	0.316884	0.000128822	0.00108082	Significant	0.652871	0.620019	NPX ~ NPC1 * Age_c + Sex + Error(SampleID)	38	0.19
SHISA5	ENSG00000164054	Cardiometabolic_II	Q8N114	OID30387	NPC1	0.31781	0.000128525	0.00108082	Significant	0.374354	0.381115	NPX ~ NPC1 * Age_c + Sex + Error(SampleID)	39	0.07
DNAJB6	ENSG00000105993	Inflammation_II	O75190	OID30613	NPC1	0.321653	0.000129242	0.00108117	Significant	-3.00558	-2.52994	NPX ~ NPC1 * Age_c + Sex + Error(SampleID)	39	3.23
ICAM3	ENSG00000076662	Cardiometabolic	P32942	OID20277	NPC1	0.317014	0.00012962	0.00108117	Significant	0.355147	0.414473	NPX ~ NPC1 * Age_c + Sex + Error(SampleID)	39	0.09
PI3	ENSG00000124102	Cardiometabolic	P19957	OID20326	Age_c	0.391658	1.21023e-05	0.00108202	Significant	0.473807	0.0703526	NPX ~ NPC1 * Age_c + Sex + Error(SampleID)		0.23
CCL27	ENSG00000213927	Cardiometabolic	Q9Y4X3	OID20121	NPC1	0.318399	0.000134062	0.00111497	Significant	0.648391	0.589836	NPX ~ NPC1 * Age_c + Sex + Error(SampleID)	39	0.18
PLA2G10	ENSG00000069764	Neurology	O15496	OID21002	NPC1	0.30862	0.000135507	0.00112372	Significant	-0.989178	-0.875877	NPX ~ NPC1 * Age_c + Sex + Error(SampleID)	38	0.39
TMEM106A	ENSG00000184988	Oncology_II	Q96A25	OID31411	NPC1	0.317649	0.000137331	0.00113229	Significant	-1.29838	-1.14823	NPX ~ NPC1 * Age_c + Sex + Error(SampleID)	39	0.67
CDH23	ENSG00000107736	Neurology_II	Q9H251	OID31074	NPC1	0.31585	0.000137017	0.00113229	Significant	0.414862	0.443273	NPX ~ NPC1 * Age_c + Sex + Error(SampleID)	39	0.10
INSL3	ENSG00000248099	Neurology_II	P51460	OID31129	Age_c	0.389113	1.31671e-05	0.00114154	Significant	0.360059	0.237226	NPX ~ NPC1 * Age_c + Sex + Error(SampleID)		2.61
GRAP2	ENSG00000100351	Cardiometabolic	O75791	OID20192	NPC1	0.317608	0.000141723	0.00116514	Significant	-1.93435	-1.78921	NPX ~ NPC1 * Age_c + Sex + Error(SampleID)	39	1.64
KLRB1	ENSG00000111796	Inflammation	Q12918	OID20629	NPC1	0.326606	0.000143312	0.00117483	Significant	0.551111	0.610559	NPX ~ NPC1 * Age_c + Sex + Error(SampleID)	37	0.19
NFATC1	ENSG00000131196	Inflammation	O95644	OID20545	NPC1	0.288154	0.000148644	0.00121506	Significant	-1.67584	-1.60725	NPX ~ NPC1 * Age_c + Sex + Error(SampleID)	37	1.39
ASS1	ENSG00000130707	Cardiometabolic_II	P00966	OID30170	NPC1	0.312222	0.000150898	0.00122997	Significant	0.908507	1.09042	NPX ~ NPC1 * Age_c + Sex + Error(SampleID)	39	0.61
SIT1	ENSG00000137078	Inflammation	Q9Y3P8	OID20462	NPC1	0.332281	0.000152278	0.00123769	Significant	0.911938	0.906642	NPX ~ NPC1 * Age_c + Sex + Error(SampleID)	36	0.34
SCRG1	ENSG00000164106	Cardiometabolic_II	O75711	OID30333	Age_c	0.393335	1.4873e-05	0.00125152	Significant	-0.0231274	-0.10059	NPX ~ NPC1 * Age_c + Sex + Error(SampleID)		0.47
DNER	ENSG00000187957	Inflammation	Q8NFT8	OID20712	Age_c	0.383577	1.58002e-05	0.00129155	Significant	0.182004	-0.0475306	NPX ~ NPC1 * Age_c + Sex + Error(SampleID)		0.11
GIPC3	ENSG00000179855	Oncology_II	Q8TF64	OID31507	NPC1	0.314061	0.000160531	0.00130108	Significant	-3.42445	-2.98444	NPX ~ NPC1 * Age_c + Sex + Error(SampleID)	39	4.65
SDC1	ENSG00000115884	Cardiometabolic	P18827	OID20169	NPC1	0.310937	0.00016319	0.00131889	Significant	0.779802	0.888635	NPX ~ NPC1 * Age_c + Sex + Error(SampleID)	39	0.41
DAB2	ENSG00000153071	Oncology	P98082	OID21428	NPC1	0.303226	0.000167296	0.00134826	Significant	-1.33012	-1.20739	NPX ~ NPC1 * Age_c + Sex + Error(SampleID)	38	0.77
TAFA5	ENSG00000219438	Oncology	Q7Z5A7	OID21321	NPC1	0.320875	0.000170937	0.00137374	Significant	0.612777	0.633148	NPX ~ NPC1 * Age_c + Sex + Error(SampleID)	37	0.20
CLIP2	ENSG00000106665	Inflammation	Q9UDT6	OID20559	NPC1	0.274123	0.000178866	0.00143343	Significant	-1.82824	-1.6878	NPX ~ NPC1 * Age_c + Sex + Error(SampleID)	37	1.57
SEZ6L	ENSG00000100095	Oncology	Q9BYH1	OID21488	Age_c	0.378265	1.87947e-05	0.00147421	Significant	0.100723	-0.095994	NPX ~ NPC1 * Age_c + Sex + Error(SampleID)		0.45
PTPRZ1	ENSG00000106278	Cardiometabolic_II	P23471	OID30343	Age_c	0.385639	1.90653e-05	0.00147421	Significant	0.142245	-0.0947268	NPX ~ NPC1 * Age_c + Sex + Error(SampleID)		0.43
TPK1	ENSG00000196511	Cardiometabolic_II	Q9H3S4	OID30338	NPC1	0.325582	0.000187688	0.00149993	Significant	0.538577	0.532956	NPX ~ NPC1 * Age_c + Sex + Error(SampleID)	38	0.14
CLPS	ENSG00000137392	Neurology	P04118	OID21156	NPC1	0.305015	0.000188904	0.00150239	Significant	0.986862	0.891318	NPX ~ NPC1 * Age_c + Sex + Error(SampleID)	39	0.43
FGF23	ENSG00000118972	Oncology	Q9GZV9	OID21411	NPC1	0.312757	0.000189297	0.00150239	Significant	0.781181	0.87997	NPX ~ NPC1 * Age_c + Sex + Error(SampleID)	38	0.42
TGFB1	ENSG00000105329	Inflammation	P01137	OID20621	NPC1	0.316796	0.000189571	0.00150239	Significant	-0.523943	-0.523142	NPX ~ NPC1 * Age_c + Sex + Error(SampleID)	37	0.14
PDZD2	ENSG00000133401	Cardiometabolic_II	O15018	OID30151	NPC1	0.307095	0.000193089	0.00152184	Significant	-1.97943	-1.77202	NPX ~ NPC1 * Age_c + Sex + Error(SampleID)	39	1.69
BDNF	ENSG00000176697	Cardiometabolic_II	P23560	OID30373	NPC1	0.306009	0.000193023	0.00152184	Significant	-1.40588	-1.36418	NPX ~ NPC1 * Age_c + Sex + Error(SampleID)	39	1.00
TMPRSS5	ENSG00000166682	Neurology	Q9H3S3	OID20947	NPC1	0.307499	0.000196381	0.00154354	Significant	0.658407	0.735899	NPX ~ NPC1 * Age_c + Sex + Error(SampleID)	38	0.29
DPP4	ENSG00000197635	Cardiometabolic	P27487	OID20406	Age_c	0.375518	2.05484e-05	0.00154708	Significant	-0.160887	-0.0473703	NPX ~ NPC1 * Age_c + Sex + Error(SampleID)		0.11
RARRES1	ENSG00000118849	Oncology	P49788	OID21177	NPC1	0.322376	0.000198645	0.00155705	Significant	0.772072	0.738164	NPX ~ NPC1 * Age_c + Sex + Error(SampleID)	36	0.27
RAB6B	ENSG00000154917	Neurology	Q9NRW1	OID20817	NPC1	0.333996	0.000200747	0.00156922	Significant	-1.65072	-1.35193	NPX ~ NPC1 * Age_c + Sex + Error(SampleID)	35	0.83
ITGB5	ENSG00000082781	Oncology	P18084	OID21522	NPC1	0.306711	0.000203261	0.00158455	Significant	-0.521287	-0.437608	NPX ~ NPC1 * Age_c + Sex + Error(SampleID)	39	0.10
MYDGF	ENSG00000074842	Cardiometabolic_II	Q969H8	OID30313	NPC1	0.331785	0.00020448	0.00158972	Significant	-2.48075	-2.00263	NPX ~ NPC1 * Age_c + Sex + Error(SampleID)	38	2.06
LILRA6	ENSG00000244482	Cardiometabolic_II	Q6PI73	OID30346	NPC1	0.314155	0.000207106	0.00160578	Significant	1.57992	1.55024	NPX ~ NPC1 * Age_c + Sex + Error(SampleID)	38	1.24
NFASC	ENSG00000163531	Inflammation	O94856	OID20634	NPC1	0.31356	0.000207758	0.00160647	Significant	0.397741	0.406081	NPX ~ NPC1 * Age_c + Sex + Error(SampleID)	37	0.09
TBC1D5	ENSG00000131374	Inflammation	Q92609	OID20521	NPC1	0.27834	0.00020908	0.00161234	Significant	-2.46264	-2.30663	NPX ~ NPC1 * Age_c + Sex + Error(SampleID)	37	3.02
DLG4	ENSG00000132535	Neurology_II	P78352	OID31071	NPC1	0.304235	0.000216268	0.00166329	Significant	-3.3263	-2.84037	NPX ~ NPC1 * Age_c + Sex + Error(SampleID)	39	4.41
DPP6	ENSG00000130226	Oncology	P42658	OID21354	NPC1	0.3118	0.000218509	0.00167601	Significant	0.7031	0.781778	NPX ~ NPC1 * Age_c + Sex + Error(SampleID)	37	0.32
SNAP23	ENSG00000092531	Cardiometabolic	O00161	OID20218	NPC1	0.302293	0.000225897	0.00172805	Significant	-2.99074	-2.60114	NPX ~ NPC1 * Age_c + Sex + Error(SampleID)	39	3.73
IGFBP3	ENSG00000146674	Cardiometabolic	P17936	OID20398	NPC1	0.296975	0.000233178	0.00177899	Significant	-0.493886	-0.553215	NPX ~ NPC1 * Age_c + Sex + Error(SampleID)	39	0.17
NUDT2	ENSG00000164978	Oncology	P50583	OID21308	NPC1	0.309748	0.000241413	0.00183692	Significant	-0.986728	-0.877167	NPX ~ NPC1 * Age_c + Sex + Error(SampleID)	37	0.41
IGDCC4	ENSG00000103742	Cardiometabolic_II	Q8TDY8	OID30402	NPC1	0.293716	0.000247516	0.00187837	Significant	-0.472051	-0.515086	NPX ~ NPC1 * Age_c + Sex + Error(SampleID)	39	0.15
LRTM2	ENSG00000166159	Neurology_II	Q8N967	OID31020	NPC1	0.292188	0.000252131	0.00190725	Significant	0.621301	0.833567	NPX ~ NPC1 * Age_c + Sex + Error(SampleID)	39	0.39
CRIM1	ENSG00000150938	Inflammation	Q9NZV1	OID20701	NPC1	0.29782	0.000252656	0.00190725	Significant	0.464153	0.368457	NPX ~ NPC1 * Age_c + Sex + Error(SampleID)	39	0.08
ADGRB3	ENSG00000135298	Neurology	O60242	OID20974	NPC1	0.295383	0.000256525	0.00193137	Significant	0.53923	0.578147	NPX ~ NPC1 * Age_c + Sex + Error(SampleID)	38	0.19
ODAM	ENSG00000109205	Neurology	A1E959	OID20793	Age_c	0.399763	2.69379e-05	0.00197614	Significant	0.761296	-0.163764	NPX ~ NPC1 * Age_c + Sex + Error(SampleID)		1.16
CCL20	ENSG00000115009	Inflammation	P78556	OID20671	NPC1	0.304213	0.000270531	0.00203147	Significant	1.12814	1.21551	NPX ~ NPC1 * Age_c + Sex + Error(SampleID)	37	0.82
PPP1R14A	ENSG00000167641	Neurology_II	Q96A00	OID31011	NPC1	0.295672	0.000271399	0.00203265	Significant	-2.4471	-2.17353	NPX ~ NPC1 * Age_c + Sex + Error(SampleID)	39	2.68
CEACAM16	ENSG00000213892	Oncology_II	Q2WEN9	OID31495	NPC1	0.289842	0.000279537	0.00208814	Significant	-0.906641	-1.03858	NPX ~ NPC1 * Age_c + Sex + Error(SampleID)	39	0.62
CRYBB2	ENSG00000244752	Neurology_II	P43320	OID31081	NPC1	0.293506	0.000281637	0.00209834	Significant	-0.506494	-0.494	NPX ~ NPC1 * Age_c + Sex + Error(SampleID)	39	0.14
ECHDC3	ENSG00000134463	Cardiometabolic_II	Q96DC8	OID30293	NPC1	0.305635	0.000292139	0.00217093	Significant	1.51122	1.5746	NPX ~ NPC1 * Age_c + Sex + Error(SampleID)	38	1.35
PLXNB3	ENSG00000198753	Cardiometabolic	Q9ULL4	OID20160	NPC1	0.293102	0.000296197	0.00219539	Significant	-1.16854	-0.99995	NPX ~ NPC1 * Age_c + Sex + Error(SampleID)	39	0.58
PDLIM5	ENSG00000163110	Neurology_II	Q96HC4	OID31063	NPC1	0.291951	0.000304349	0.00224998	Significant	-2.11737	-1.83315	NPX ~ NPC1 * Age_c + Sex + Error(SampleID)	39	1.95
SULT2A1	ENSG00000105398	Inflammation	Q06520	OID20508	NPC1	0.271998	0.000306255	0.00225823	Significant	1.28274	1.4257	NPX ~ NPC1 * Age_c + Sex + Error(SampleID)	37	1.23
CD226	ENSG00000150637	Inflammation_II	Q15762	OID30556	NPC1	0.290037	0.000311687	0.00229238	Significant	-0.919702	-0.856434	NPX ~ NPC1 * Age_c + Sex + Error(SampleID)	39	0.43
GPC5	ENSG00000179399	Neurology	P78333	OID20944	NPC1	0.288532	0.000331011	0.00242826	Significant	-0.817196	-0.844145	NPX ~ NPC1 * Age_c + Sex + Error(SampleID)	38	0.42
COL4A1	ENSG00000187498	Cardiometabolic	P02462	OID20208	Age_c	0.359598	3.42228e-05	0.00244779	Significant	2.63762	-0.071565	NPX ~ NPC1 * Age_c + Sex + Error(SampleID)		0.27
NELL1	ENSG00000165973	Oncology	Q92832	OID21494	NPC1	0.286003	0.000346593	0.00253607	Significant	-0.657857	-0.602305	NPX ~ NPC1 * Age_c + Sex + Error(SampleID)	39	0.21
YES1	ENSG00000176105	Oncology	P07947	OID21348	NPC1	0.295717	0.000359392	0.00262301	Significant	-1.84848	-1.61549	NPX ~ NPC1 * Age_c + Sex + Error(SampleID)	37	1.47
PRDX5	ENSG00000126432	Inflammation	P30044	OID20644	NPC1	0.293609	0.000361549	0.00262399	Significant	-1.98166	-1.94704	NPX ~ NPC1 * Age_c + Sex + Error(SampleID)	37	2.21
CNDP1	ENSG00000150656	Cardiometabolic	Q96KN2	OID20347	NPC1	0.280744	0.000364111	0.00262399	Significant	-1.24406	-1.64532	NPX ~ NPC1 * Age_c + Sex + Error(SampleID)	39	1.62
RTBDN	ENSG00000132026	Oncology	Q9BSG5	OID21343	NPC1	0.292839	0.000363855	0.00262399	Significant	0.534095	0.712238	NPX ~ NPC1 * Age_c + Sex + Error(SampleID)	37	0.29
CDNF	ENSG00000185267	Oncology	Q49AH0	OID21318	NPC1	0.294615	0.000361534	0.00262399	Significant	-0.49228	-0.607496	NPX ~ NPC1 * Age_c + Sex + Error(SampleID)	37	0.21
MENT		Inflammation_II	Q9BUN1	OID30595	NPC1	0.285241	0.000364029	0.00262399	Significant	-0.256108	-0.222215	NPX ~ NPC1 * Age_c + Sex + Error(SampleID)	39	0.03
ISLR2	ENSG00000167178	Neurology	Q6UXK2	OID20889	Age_c	0.388472	3.78012e-05	0.00263778	Significant	0.0734869	-0.0804733	NPX ~ NPC1 * Age_c + Sex + Error(SampleID)		0.29
IRAG2	ENSG00000118308	Cardiometabolic	Q12912	OID20085	NPC1	0.294035	0.000376584	0.00270705	Significant	-1.87226	-1.64011	NPX ~ NPC1 * Age_c + Sex + Error(SampleID)	32	1.38
RTN4R	ENSG00000040608	Oncology	Q9BZR6	OID21424	NPC1	0.264782	0.000378375	0.00271311	Significant	0.391875	0.27454	NPX ~ NPC1 * Age_c + Sex + Error(SampleID)	38	0.05
IQGAP2	ENSG00000145703	Oncology	Q13576	OID21361	NPC1	0.293127	0.000386866	0.00276397	Significant	-3.36727	-2.76612	NPX ~ NPC1 * Age_c + Sex + Error(SampleID)	37	4.37
HAO1	ENSG00000101323	Oncology	Q9UJM8	OID21395	NPC1	0.275893	0.0003874	0.00276397	Significant	1.95595	1.92718	NPX ~ NPC1 * Age_c + Sex + Error(SampleID)	38	2.26
PCDHB15	ENSG00000113248	Oncology_II	Q9Y5E8	OID31377	NPC1	0.281903	0.000394576	0.00280816	Significant	0.813723	0.790334	NPX ~ NPC1 * Age_c + Sex + Error(SampleID)	39	0.38
IL6ST	ENSG00000134352	Cardiometabolic	P40189	OID20147	NPC1	0.277196	0.000399456	0.00283584	Significant	0.196674	0.232517	NPX ~ NPC1 * Age_c + Sex + Error(SampleID)	39	0.03
DAAM1	ENSG00000100592	Inflammation_II	Q9Y4D1	OID30664	NPC1	0.281342	0.000404058	0.00286141	Significant	-1.7947	-1.6207	NPX ~ NPC1 * Age_c + Sex + Error(SampleID)	39	1.60
STX4	ENSG00000103496	Oncology	Q12846	OID21326	NPC1	0.290408	0.000416857	0.00294476	Significant	-2.57832	-2.20315	NPX ~ NPC1 * Age_c + Sex + Error(SampleID)	37	2.81
SKAP2	ENSG00000005020	Inflammation	O75563	OID20761	NPC1	0.281131	0.000418722	0.00295065	Significant	-3.15516	-2.64554	NPX ~ NPC1 * Age_c + Sex + Error(SampleID)	39	4.28
VTI1A	ENSG00000151532	Inflammation_II	Q96AJ9	OID30640	NPC1	0.280892	0.000423215	0.00297499	Significant	-2.04864	-1.68178	NPX ~ NPC1 * Age_c + Sex + Error(SampleID)	39	1.73
LACRT	ENSG00000135413	Oncology_II	Q9GZZ8	OID31367	NPC1	0.273767	0.000424988	0.00298012	Significant	1.06675	1.58887	NPX ~ NPC1 * Age_c + Sex + Error(SampleID)	39	1.55
SNED1	ENSG00000162804	Cardiometabolic_II	Q8TER0	OID30205	NPC1	0.281116	0.000439846	0.00307677	Significant	0.663559	0.726971	NPX ~ NPC1 * Age_c + Sex + Error(SampleID)	38	0.31
PON1	ENSG00000005421	Inflammation_II	P27169	OID30704	NPC1	0.275573	0.000442633	0.00308872	Significant	-0.386113	-0.389948	NPX ~ NPC1 * Age_c + Sex + Error(SampleID)	39	0.09
SEZ6	ENSG00000063015	Neurology_II	Q53EL9	OID30968	Age_c	0.3817	4.61927e-05	0.00308881	Significant	0.440642	-0.11011	NPX ~ NPC1 * Age_c + Sex + Error(SampleID)		0.59
TIMP4	ENSG00000157150	Neurology	Q99727	OID21147	Age_c	0.349908	4.64239e-05	0.00308881	Significant	-0.703955	0.0516837	NPX ~ NPC1 * Age_c + Sex + Error(SampleID)		0.15
SNAP29	ENSG00000099940	Oncology	O95721	OID21506	NPC1	0.27759	0.000454446	0.00315915	Significant	-2.75601	-2.40478	NPX ~ NPC1 * Age_c + Sex + Error(SampleID)	39	3.59
PLB1	ENSG00000163803	Neurology_II	Q6P1J6	OID31110	NPC1	0.275014	0.000454936	0.00315915	Significant	-0.883378	-0.866781	NPX ~ NPC1 * Age_c + Sex + Error(SampleID)	39	0.47
SERPINA9	ENSG00000170054	Oncology	Q86WD7	OID21284	Age_c	0.362148	5.06899e-05	0.00322275	Significant	0.00888591	-0.134858	NPX ~ NPC1 * Age_c + Sex + Error(SampleID)		0.99
RTN4R	ENSG00000040608	Oncology	Q9BZR6	OID21424	Age_c	0.354636	5.04215e-05	0.00322275	Significant	0.391875	0.0287865	NPX ~ NPC1 * Age_c + Sex + Error(SampleID)		0.05
CRTAM	ENSG00000109943	Neurology	O95727	OID20914	NPC1	0.276762	0.000465606	0.00322542	Significant	0.610831	0.637212	NPX ~ NPC1 * Age_c + Sex + Error(SampleID)	38	0.25
CSPG5	ENSG00000114646	Neurology_II	O95196	OID30843	NPC1	0.271218	0.000478643	0.00330772	Significant	0.769164	1.15444	NPX ~ NPC1 * Age_c + Sex + Error(SampleID)	38	0.81
CA5A	ENSG00000174990	Cardiometabolic	P35218	OID20075	NPC1	0.294448	0.000479968	0.00330889	Significant	1.39871	1.50568	NPX ~ NPC1 * Age_c + Sex + Error(SampleID)	32	1.22
APCS	ENSG00000132703	Inflammation_II	P02743	OID30778	NPC1	0.272069	0.000481309	0.00331015	Significant	-0.895652	-0.975424	NPX ~ NPC1 * Age_c + Sex + Error(SampleID)	39	0.60
BRK1	ENSG00000254999	Neurology	Q8WUW1	OID20883	NPC1	0.299692	0.000487983	0.00334801	Significant	-0.472699	-0.482774	NPX ~ NPC1 * Age_c + Sex + Error(SampleID)	35	0.12
COL5A1	ENSG00000130635	Inflammation_II	P20908	OID30587	Age_c	0.345005	5.40866e-05	0.00336395	Significant	-0.118035	-0.100096	NPX ~ NPC1 * Age_c + Sex + Error(SampleID)		0.56
NOTCH2	ENSG00000134250	Cardiometabolic_II	Q04721	OID30407	NPC1	0.271391	0.000493316	0.0033765	Significant	0.352894	0.392991	NPX ~ NPC1 * Age_c + Sex + Error(SampleID)	39	0.10
SELPLG	ENSG00000110876	Inflammation	Q14242	OID20560	NPC1	0.274996	0.00050098	0.00342077	Significant	-0.438242	-0.448747	NPX ~ NPC1 * Age_c + Sex + Error(SampleID)	37	0.13
PM20D1	ENSG00000162877	Cardiometabolic	Q6GTS8	OID20149	Age_c	0.342573	5.83202e-05	0.00353826	Significant	-0.730499	0.289295	NPX ~ NPC1 * Age_c + Sex + Error(SampleID)		4.74
AMBN	ENSG00000178522	Inflammation	Q9NP70	OID20437	Age_c	0.364841	5.93626e-05	0.00353826	Significant	1.00431	-0.242265	NPX ~ NPC1 * Age_c + Sex + Error(SampleID)		2.72
SPART	ENSG00000133104	Inflammation_II	Q8N0X7	OID30656	NPC1	0.272905	0.000526577	0.00357847	Significant	-2.6864	-2.25475	NPX ~ NPC1 * Age_c + Sex + Error(SampleID)	39	3.24
IL34	ENSG00000157368	Neurology	Q6ZMJ4	OID20809	NPC1	0.295342	0.00052556	0.00357847	Significant	0.960172	1.10548	NPX ~ NPC1 * Age_c + Sex + Error(SampleID)	35	0.66
SESTD1	ENSG00000187231	Neurology	Q86VW0	OID20790	NPC1	0.296777	0.000528587	0.00358153	Significant	-1.65781	-1.50939	NPX ~ NPC1 * Age_c + Sex + Error(SampleID)	35	1.23
SYAP1	ENSG00000169895	Inflammation_II	Q96A49	OID30636	NPC1	0.271832	0.000529531	0.00358153	Significant	-1.23808	-1.09061	NPX ~ NPC1 * Age_c + Sex + Error(SampleID)	39	0.76
RAB27B	ENSG00000041353	Cardiometabolic_II	O00194	OID30354	NPC1	0.293743	0.000531488	0.00358629	Significant	-2.94882	-2.53487	NPX ~ NPC1 * Age_c + Sex + Error(SampleID)	38	3.89
MOG	ENSG00000204655	Oncology	Q16653	OID21384	Age_c	0.348014	6.1724e-05	0.00360393	Significant	0.470094	-0.0538054	NPX ~ NPC1 * Age_c + Sex + Error(SampleID)		0.16
PHOSPHO1	ENSG00000173868	Neurology	Q8TCT1	OID20922	NPC1	0.274564	0.000540056	0.00363553	Significant	-0.371505	-0.460444	NPX ~ NPC1 * Age_c + Sex + Error(SampleID)	38	0.14
EPHA4	ENSG00000116106	Inflammation_II	P54764	OID30622	Age_c	0.339516	6.40948e-05	0.00366751	Significant	0.454426	-0.0604334	NPX ~ NPC1 * Age_c + Sex + Error(SampleID)		0.21
FGFR2	ENSG00000066468	Oncology	P21802	OID21478	NPC1	0.264491	0.00057415	0.00385413	Significant	0.253068	0.360799	NPX ~ NPC1 * Age_c + Sex + Error(SampleID)	39	0.08
EFEMP1	ENSG00000115380	Cardiometabolic	Q12805	OID20414	NPC1	0.266934	0.000575223	0.00385413	Significant	-0.268937	-0.309971	NPX ~ NPC1 * Age_c + Sex + Error(SampleID)	39	0.06
IL12B	ENSG00000113302	Inflammation	P29460	OID20666	NPC1	0.276549	0.000586814	0.00392261	Significant	0.71909	0.840167	NPX ~ NPC1 * Age_c + Sex + Error(SampleID)	37	0.45
IL31RA	ENSG00000164509	Inflammation_II	Q8NI17	OID30475	Age_c	0.336474	7.03831e-05	0.00394835	Significant	0.398927	-0.111113	NPX ~ NPC1 * Age_c + Sex + Error(SampleID)		0.72
ITGB1	ENSG00000150093	Cardiometabolic	P05556	OID20376	Age_c	0.335693	7.20902e-05	0.00396635	Significant	-0.169643	-0.035748	NPX ~ NPC1 * Age_c + Sex + Error(SampleID)		0.07
STAM	ENSG00000136738	Oncology_II	Q92783	OID31425	NPC1	0.268847	0.000597115	0.00398216	Significant	-2.36809	-1.9181	NPX ~ NPC1 * Age_c + Sex + Error(SampleID)	39	2.40
SCAMP3	ENSG00000116521	Oncology	O14828	OID21332	NPC1	0.276193	0.000612502	0.00406138	Significant	-2.6621	-2.30192	NPX ~ NPC1 * Age_c + Sex + Error(SampleID)	37	3.29
BPIFB1	ENSG00000125999	Cardiometabolic	Q8TDL5	OID20308	NPC1	0.268361	0.000613253	0.00406138	Significant	-1.00624	-0.910121	NPX ~ NPC1 * Age_c + Sex + Error(SampleID)	39	0.54
CCL25	ENSG00000131142	Inflammation	O15444	OID20674	NPC1	0.274448	0.000612989	0.00406138	Significant	0.815414	0.753351	NPX ~ NPC1 * Age_c + Sex + Error(SampleID)	37	0.36
DCTD	ENSG00000129187	Inflammation_II	P32321	OID30657	NPC1	0.266986	0.000620521	0.00410002	Significant	-1.93957	-1.63904	NPX ~ NPC1 * Age_c + Sex + Error(SampleID)	39	1.76
SHBG	ENSG00000129214	Inflammation_II	P04278	OID30685	Age_c	0.333351	7.74481e-05	0.00418074	Significant	0.575288	-0.110859	NPX ~ NPC1 * Age_c + Sex + Error(SampleID)		0.73
TACC3	ENSG00000013810	Oncology	Q9Y6A5	OID21285	NPC1	0.274271	0.000642481	0.00422561	Significant	-2.68359	-2.3832	NPX ~ NPC1 * Age_c + Sex + Error(SampleID)	37	3.55
MTSS1	ENSG00000170873	Oncology_II	O43312	OID31492	NPC1	0.26523	0.000642452	0.00422561	Significant	-2.4262	-2.13876	NPX ~ NPC1 * Age_c + Sex + Error(SampleID)	39	3.02
B2M	ENSG00000166710	Inflammation_II	P61769	OID30725	NPC1	0.262914	0.000644112	0.00422661	Significant	0.421019	0.409655	NPX ~ NPC1 * Age_c + Sex + Error(SampleID)	39	0.11
SULT1A1	ENSG00000196502	Neurology	P50225	OID21031	NPC1	0.26506	0.000653724	0.0042701	Significant	-2.93834	-2.48957	NPX ~ NPC1 * Age_c + Sex + Error(SampleID)	39	4.11
TFF2	ENSG00000160181	Inflammation	Q03403	OID20787	NPC1	0.258068	0.000653488	0.0042701	Significant	0.403632	0.515177	NPX ~ NPC1 * Age_c + Sex + Error(SampleID)	39	0.18
MCFD2	ENSG00000180398	Cardiometabolic	Q8NI22	OID20171	NPC1	0.265999	0.000657358	0.00428406	Significant	-0.417073	-0.328398	NPX ~ NPC1 * Age_c + Sex + Error(SampleID)	39	0.07
PKD2	ENSG00000118762	Cardiometabolic_II	Q13563	OID30184	NPC1	0.264858	0.000666696	0.00433504	Significant	-2.83424	-2.27743	NPX ~ NPC1 * Age_c + Sex + Error(SampleID)	39	3.45
IGF2R	ENSG00000197081	Neurology	P11717	OID21146	NPC1	0.259555	0.000675158	0.0043801	Significant	0.258428	0.312045	NPX ~ NPC1 * Age_c + Sex + Error(SampleID)	39	0.06
CACYBP	ENSG00000116161	Inflammation_II	Q9HB71	OID30649	NPC1	0.263917	0.000680792	0.00440641	Significant	-2.90351	-2.39898	NPX ~ NPC1 * Age_c + Sex + Error(SampleID)	39	3.85
GPRC5C	ENSG00000170412	Oncology_II	Q9NQ84	OID31340	NPC1	0.259892	0.000682293	0.00440641	Significant	1.35594	1.5742	NPX ~ NPC1 * Age_c + Sex + Error(SampleID)	39	1.66
GSTP1	ENSG00000084207	Neurology	P09211	OID20876	NPC1	0.287531	0.000685599	0.00440786	Significant	-1.34511	-1.10329	NPX ~ NPC1 * Age_c + Sex + Error(SampleID)	35	0.69
CD99	ENSG00000002586	Neurology	P14209	OID21110	NPC1	0.262868	0.000684202	0.00440786	Significant	-0.437351	-0.328767	NPX ~ NPC1 * Age_c + Sex + Error(SampleID)	39	0.07
TYMP	ENSG00000025708	Cardiometabolic	P19971	OID20234	NPC1	0.259572	0.000694049	0.00445218	Significant	0.839673	0.917775	NPX ~ NPC1 * Age_c + Sex + Error(SampleID)	39	0.56
MMP8	ENSG00000118113	Neurology	P22894	OID21019	NPC1	0.262079	0.000703004	0.00449954	Significant	-1.78135	-1.63643	NPX ~ NPC1 * Age_c + Sex + Error(SampleID)	39	1.80
KLRD1	ENSG00000134539	Inflammation	Q13241	OID20632	NPC1	0.269491	0.000706742	0.00451337	Significant	0.554101	0.60762	NPX ~ NPC1 * Age_c + Sex + Error(SampleID)	37	0.24
SCG3	ENSG00000104112	Inflammation	Q8WXD2	OID20728	NPC1	0.254149	0.000719076	0.00458191	Significant	0.40279	0.661909	NPX ~ NPC1 * Age_c + Sex + Error(SampleID)	39	0.30
PLSCR3	ENSG00000187838	Neurology_II	Q9NRY6	OID31146	NPC1	0.261771	0.000727306	0.0046138	Significant	-2.08033	-1.66017	NPX ~ NPC1 * Age_c + Sex + Error(SampleID)	39	1.86
ASPN	ENSG00000106819	Cardiometabolic_II	Q9BXN1	OID30315	NPC1	0.249915	0.000726485	0.0046138	Significant	0.297761	0.477062	NPX ~ NPC1 * Age_c + Sex + Error(SampleID)	38	0.15
PAG1	ENSG00000076641	Cardiometabolic	Q9NWQ8	OID20108	NPC1	0.267535	0.000741605	0.0046941	Significant	-1.60908	-1.41572	NPX ~ NPC1 * Age_c + Sex + Error(SampleID)	32	1.17
CEP170	ENSG00000143702	Cardiometabolic_II	Q5SW79	OID30240	NPC1	0.264171	0.000744928	0.00470472	Significant	-2.72397	-2.17931	NPX ~ NPC1 * Age_c + Sex + Error(SampleID)	38	3.07
TOP1	ENSG00000198900	Oncology_II	P11387	OID31449	Age_c	0.328717	8.91961e-05	0.00472122	Significant	-0.392927	0.198822	NPX ~ NPC1 * Age_c + Sex + Error(SampleID)		2.38
AOC3	ENSG00000131471	Cardiometabolic	Q16853	OID20389	Age_c	0.327551	9.24112e-05	0.00472122	Significant	0.0225267	-0.047537	NPX ~ NPC1 * Age_c + Sex + Error(SampleID)		0.14
TTR	ENSG00000118271	Inflammation_II	P02766	OID30782	Age_c	0.327567	9.23665e-05	0.00472122	Significant	-0.0679267	0.0337173	NPX ~ NPC1 * Age_c + Sex + Error(SampleID)		0.07
ACVRL1	ENSG00000139567	Neurology	P37023	OID20999	NPC1	0.256948	0.000757524	0.00477374	Significant	0.316173	0.325931	NPX ~ NPC1 * Age_c + Sex + Error(SampleID)	38	0.07
CA6	ENSG00000131686	Neurology	P23280	OID21096	NPC1	0.253684	0.000765772	0.00480491	Significant	-0.710285	-0.831834	NPX ~ NPC1 * Age_c + Sex + Error(SampleID)	39	0.47
CD6	ENSG00000013725	Inflammation	P30203	OID20649	NPC1	0.266557	0.00076583	0.00480491	Significant	0.586531	0.710049	NPX ~ NPC1 * Age_c + Sex + Error(SampleID)	37	0.34
MARCO	ENSG00000019169	Cardiometabolic	Q9UEW3	OID20210	NPC1	0.255379	0.000769411	0.00481682	Significant	0.344228	0.364499	NPX ~ NPC1 * Age_c + Sex + Error(SampleID)	39	0.09
FGFBP2	ENSG00000137441	Cardiometabolic_II	Q9BYJ0	OID30395	Age_c	0.326156	9.64018e-05	0.00483869	Significant	-0.644679	-0.101581	NPX ~ NPC1 * Age_c + Sex + Error(SampleID)		0.63
CPA4	ENSG00000128510	Inflammation_II	Q9UI42	OID30606	NPC1	0.252232	0.000784918	0.00490316	Significant	-0.460902	-0.561313	NPX ~ NPC1 * Age_c + Sex + Error(SampleID)	39	0.22
CD34	ENSG00000174059	Neurology	P28906	OID21025	Age_c	0.32481	0.000100409	0.00495293	Significant	-0.169823	-0.0308451	NPX ~ NPC1 * Age_c + Sex + Error(SampleID)		0.06
ACRV1	ENSG00000134940	Inflammation_II	P26436	OID30513	Sex	0.395015	1.0823e-05	0.00504881	Significant	0.358518	0.584683	NPX ~ NPC1 * Age_c + Sex + Error(SampleID)		0.56
RTBDN	ENSG00000132026	Oncology	Q9BSG5	OID21343	Sex	0.407346	1.23529e-05	0.00504881	Significant	0.534095	-0.430882	NPX ~ NPC1 * Age_c + Sex + Error(SampleID)		0.29
ENPP6	ENSG00000164303	Cardiometabolic_II	Q6UWR7	OID30273	Age_c	0.329649	0.000107154	0.00511404	Significant	-0.504036	-0.0578607	NPX ~ NPC1 * Age_c + Sex + Error(SampleID)		0.19
SDK2	ENSG00000069188	Inflammation_II	Q58EX2	OID30662	Age_c	0.322627	0.00010725	0.00511404	Significant	0.575202	-0.0480797	NPX ~ NPC1 * Age_c + Sex + Error(SampleID)		0.14
ACAA1	ENSG00000060971	Oncology	P09110	OID21269	NPC1	0.270008	0.0008222	0.00512487	Significant	1.66096	1.71674	NPX ~ NPC1 * Age_c + Sex + Error(SampleID)	36	1.88
CCL17	ENSG00000102970	Inflammation	Q92583	OID20745	NPC1	0.25503	0.00083426	0.00518873	Significant	-1.33055	-1.21736	NPX ~ NPC1 * Age_c + Sex + Error(SampleID)	39	1.03
CKB	ENSG00000166165	Cardiometabolic_II	P12277	OID30400	NPC1	0.247299	0.000837592	0.00519816	Significant	0.4799	0.752405	NPX ~ NPC1 * Age_c + Sex + Error(SampleID)	39	0.39
MAP2	ENSG00000078018	Neurology_II	P11137	OID31138	NPC1	0.25571	0.000841503	0.00521112	Significant	-1.29187	-1.08131	NPX ~ NPC1 * Age_c + Sex + Error(SampleID)	39	0.81
COL18A1	ENSG00000182871	Cardiometabolic	P39060	OID20332	NPC1	0.252388	0.000857229	0.00529705	Significant	0.214133	0.21989	NPX ~ NPC1 * Age_c + Sex + Error(SampleID)	39	0.03
GUCY2C	ENSG00000070019	Oncology_II	P25092	OID31318	NPC1	0.267359	0.000876283	0.00539149	Significant	1.86194	2.39078	NPX ~ NPC1 * Age_c + Sex + Error(SampleID)	37	3.86
MFAP5	ENSG00000197614	Cardiometabolic	Q13361	OID20239	NPC1	0.245186	0.000874921	0.00539149	Significant	-0.321366	-0.678084	NPX ~ NPC1 * Age_c + Sex + Error(SampleID)	39	0.32
APPL2	ENSG00000136044	Inflammation_II	Q8NEU8	OID30590	NPC1	0.252864	0.000896609	0.00550472	Significant	-1.97264	-1.74932	NPX ~ NPC1 * Age_c + Sex + Error(SampleID)	39	2.15
VNN2	ENSG00000112303	Oncology	O95498	OID21310	NPC1	0.260111	0.000938767	0.00575121	Significant	-0.848879	-0.837677	NPX ~ NPC1 * Age_c + Sex + Error(SampleID)	37	0.47
GAPDH	ENSG00000111640	Inflammation_II	P04406	OID30600	NPC1	0.248901	0.000952626	0.00582364	Significant	-1.48473	-1.6152	NPX ~ NPC1 * Age_c + Sex + Error(SampleID)	39	1.86
LEP	ENSG00000174697	Cardiometabolic	P41159	OID20187	Age_c	0.317629	0.000124628	0.00582455	Significant	-0.259158	0.160887	NPX ~ NPC1 * Age_c + Sex + Error(SampleID)		1.64
FAP	ENSG00000078098	Cardiometabolic	Q12884	OID20330	Age_c	0.317205	0.000126222	0.00582455	Significant	-0.613218	-0.0608154	NPX ~ NPC1 * Age_c + Sex + Error(SampleID)		0.23
CORO1A	ENSG00000102879	Cardiometabolic	P31146	OID20286	NPC1	0.251294	0.000959762	0.00585475	Significant	-2.98567	-2.47764	NPX ~ NPC1 * Age_c + Sex + Error(SampleID)	39	4.38
MEGF11	ENSG00000157890	Cardiometabolic_II	A6BM72	OID30099	NPC1	0.242492	0.000966619	0.00588404	Significant	0.199135	0.498208	NPX ~ NPC1 * Age_c + Sex + Error(SampleID)	39	0.18
MAMDC2	ENSG00000165072	Cardiometabolic_II	Q7Z304	OID30309	NPC1	0.266888	0.000975897	0.0059279	Significant	0.535116	0.457511	NPX ~ NPC1 * Age_c + Sex + Error(SampleID)	38	0.14
ADA	ENSG00000196839	Inflammation	P00813	OID20645	NPC1	0.256699	0.000991027	0.00600705	Significant	0.612042	0.628759	NPX ~ NPC1 * Age_c + Sex + Error(SampleID)	37	0.28
SCG2	ENSG00000171951	Oncology	P13521	OID21400	NPC1	0.254028	0.00100535	0.00608101	Significant	0.475683	0.588526	NPX ~ NPC1 * Age_c + Sex + Error(SampleID)	38	0.25
CRNN	ENSG00000143536	Oncology	Q9UBG3	OID21427	Age_c	0.320871	0.000138831	0.00620619	Significant	0.02647	-0.111026	NPX ~ NPC1 * Age_c + Sex + Error(SampleID)		0.79
WFIKKN2	ENSG00000173714	Inflammation	Q8TEU8	OID20785	Age_c	0.314327	0.000137559	0.00620619	Significant	0.341974	-0.0742481	NPX ~ NPC1 * Age_c + Sex + Error(SampleID)		0.35
FOSB	ENSG00000125740	Neurology	P53539	OID20791	NPC1	0.270826	0.00103975	0.00627578	Significant	-1.72621	-1.45746	NPX ~ NPC1 * Age_c + Sex + Error(SampleID)	35	1.30
VASP	ENSG00000125753	Inflammation_II	P50552	OID30692	NPC1	0.248598	0.00104224	0.00627757	Significant	-1.36358	-1.12496	NPX ~ NPC1 * Age_c + Sex + Error(SampleID)	39	0.92
NAGPA	ENSG00000103174	Inflammation_II	Q9UK23	OID30643	NPC1	0.241946	0.00105663	0.0063509	Significant	0.172148	0.28395	NPX ~ NPC1 * Age_c + Sex + Error(SampleID)	39	0.06
FKBP5	ENSG00000096060	Neurology	Q13451	OID20937	NPC1	0.236638	0.00106963	0.00641554	Significant	-2.60709	-2.2776	NPX ~ NPC1 * Age_c + Sex + Error(SampleID)	38	3.81
MAVS	ENSG00000088888	Oncology	Q7Z434	OID21204	NPC1	0.259178	0.00108337	0.00645152	Significant	-2.58725	-2.16984	NPX ~ NPC1 * Age_c + Sex + Error(SampleID)	36	3.18
MZT1	ENSG00000204899	Oncology	Q08AG7	OID21186	NPC1	0.259084	0.00108465	0.00645152	Significant	-1.91863	-1.5843	NPX ~ NPC1 * Age_c + Sex + Error(SampleID)	36	1.69
FCRLB	ENSG00000162746	Oncology	Q6BAA4	OID21193	NPC1	0.259579	0.00107884	0.00645152	Significant	0.853489	0.783932	NPX ~ NPC1 * Age_c + Sex + Error(SampleID)	36	0.41
PLTP	ENSG00000100979	Cardiometabolic	P55058	OID20238	NPC1	0.245213	0.00108353	0.00645152	Significant	-0.532218	-0.524138	NPX ~ NPC1 * Age_c + Sex + Error(SampleID)	39	0.20
FAS	ENSG00000026103	Cardiometabolic	P25445	OID20316	Age_c	0.312196	0.000146575	0.00645156	Significant	0.18172	0.0312066	NPX ~ NPC1 * Age_c + Sex + Error(SampleID)		0.06
LRIG1	ENSG00000144749	Oncology	Q96JA1	OID21429	NPC1	0.241752	0.00109153	0.00647899	Significant	-0.456588	-0.47412	NPX ~ NPC1 * Age_c + Sex + Error(SampleID)	38	0.17
CLEC4A	ENSG00000111729	Inflammation	Q9UMR7	OID20573	NPC1	0.212959	0.00110519	0.00653293	Significant	-0.616307	-0.543184	NPX ~ NPC1 * Age_c + Sex + Error(SampleID)	37	0.23
AFM	ENSG00000079557	Inflammation_II	P43652	OID30741	NPC1	0.240702	0.00110456	0.00653293	Significant	-0.222294	-0.304459	NPX ~ NPC1 * Age_c + Sex + Error(SampleID)	39	0.07
CASP9	ENSG00000132906	Inflammation_II	P55211	OID30530	NPC1	0.245325	0.00110998	0.00654773	Significant	-3.427	-2.94546	NPX ~ NPC1 * Age_c + Sex + Error(SampleID)	39	6.37
TNFSF14	ENSG00000125735	Neurology	O43557	OID20953	NPC1	0.233506	0.00112292	0.00660219	Significant	-1.5508	-1.38127	NPX ~ NPC1 * Age_c + Sex + Error(SampleID)	38	1.41
TYRO3	ENSG00000092445	Cardiometabolic	Q06418	OID20161	NPC1	0.241355	0.00112383	0.00660219	Significant	0.304374	0.357847	NPX ~ NPC1 * Age_c + Sex + Error(SampleID)	39	0.09
SMAD1	ENSG00000170365	Oncology	Q15797	OID21180	NPC1	0.257552	0.00113051	0.00662783	Significant	-0.951409	-0.813354	NPX ~ NPC1 * Age_c + Sex + Error(SampleID)	36	0.45
AREG	ENSG00000109321	Oncology	P15514	OID21357	NPC1	0.251986	0.00116258	0.00678253	Significant	-1.7368	-1.43281	NPX ~ NPC1 * Age_c + Sex + Error(SampleID)	37	1.44
KYAT1	ENSG00000171097	Cardiometabolic	Q16773	OID20232	NPC1	0.239825	0.00116875	0.00678253	Significant	0.913695	1.00343	NPX ~ NPC1 * Age_c + Sex + Error(SampleID)	39	0.75
CTSB	ENSG00000164733	Cardiometabolic	P07858	OID20276	NPC1	0.241181	0.00116723	0.00678253	Significant	0.828727	0.837774	NPX ~ NPC1 * Age_c + Sex + Error(SampleID)	39	0.52
ITIH4	ENSG00000055955	Inflammation_II	Q14624	OID30762	NPC1	0.241446	0.00116809	0.00678253	Significant	-0.796314	-0.783815	NPX ~ NPC1 * Age_c + Sex + Error(SampleID)	39	0.46
NPTX2	ENSG00000106236	Cardiometabolic_II	P47972	OID30390	NPC1	0.241914	0.00116556	0.00678253	Significant	-0.41273	-0.441067	NPX ~ NPC1 * Age_c + Sex + Error(SampleID)	39	0.14
TFRC	ENSG00000072274	Cardiometabolic	P02786	OID20369	NPC1	0.239082	0.00118531	0.00686471	Significant	0.346601	0.379336	NPX ~ NPC1 * Age_c + Sex + Error(SampleID)	39	0.11
AP1G2	ENSG00000213983	Oncology_II	O75843	OID31348	NPC1	0.243644	0.00119652	0.00691565	Significant	-2.6726	-2.11503	NPX ~ NPC1 * Age_c + Sex + Error(SampleID)	39	3.33
CR2	ENSG00000117322	Cardiometabolic	P20023	OID20393	Age_c	0.308903	0.000161627	0.00700629	Significant	0.718791	-0.0490901	NPX ~ NPC1 * Age_c + Sex + Error(SampleID)		0.16
NXPH1	ENSG00000122584	Neurology	P58417	OID20849	NPC1	0.261031	0.00123946	0.00714843	Significant	0.314063	0.381758	NPX ~ NPC1 * Age_c + Sex + Error(SampleID)	35	0.09
CFH	ENSG00000000971	Inflammation_II	P08603	OID30790	NPC1	0.238381	0.00124179	0.00714843	Significant	-0.312383	-0.329651	NPX ~ NPC1 * Age_c + Sex + Error(SampleID)	39	0.08
CCL28	ENSG00000151882	Inflammation	Q9NRJ3	OID20569	NPC1	0.227533	0.00126316	0.00725681	Significant	1.5483	1.38262	NPX ~ NPC1 * Age_c + Sex + Error(SampleID)	37	1.50
CD86	ENSG00000114013	Oncology_II	P42081	OID31500	Age_c	0.306958	0.000171201	0.00731055	Significant	0.602122	-0.0394539	NPX ~ NPC1 * Age_c + Sex + Error(SampleID)		0.10
PRKAB1	ENSG00000111725	Inflammation	Q9Y478	OID20444	NPC1	0.253009	0.00129024	0.00739753	Significant	-2.00774	-1.68936	NPX ~ NPC1 * Age_c + Sex + Error(SampleID)	36	1.74
DAPP1	ENSG00000070190	Inflammation	Q9UN19	OID20524	NPC1	0.219987	0.00130804	0.00744553	Significant	-1.23835	-1.25307	NPX ~ NPC1 * Age_c + Sex + Error(SampleID)	37	1.24
IL12RB1	ENSG00000096996	Inflammation	P42701	OID20486	NPC1	0.252477	0.00130663	0.00744553	Significant	0.808812	0.888421	NPX ~ NPC1 * Age_c + Sex + Error(SampleID)	36	0.48
GSR	ENSG00000104687	Inflammation_II	P00390	OID30700	NPC1	0.23531	0.00130902	0.00744553	Significant	0.387173	0.447518	NPX ~ NPC1 * Age_c + Sex + Error(SampleID)	39	0.15
PHYKPL	ENSG00000175309	Inflammation_II	Q8IUZ5	OID30634	NPC1	0.236834	0.00130405	0.00744553	Significant	0.411724	0.435937	NPX ~ NPC1 * Age_c + Sex + Error(SampleID)	39	0.14
MYOM3	ENSG00000142661	Inflammation_II	Q5VTT5	OID30633	NPC1	0.233853	0.00131832	0.0074772	Significant	-1.1325	-1.39561	NPX ~ NPC1 * Age_c + Sex + Error(SampleID)	39	1.48
LY75	ENSG00000054219	Inflammation	O60449	OID20580	NPC1	0.249739	0.00131981	0.0074772	Significant	0.363282	0.393093	NPX ~ NPC1 * Age_c + Sex + Error(SampleID)	37	0.12
PMVK	ENSG00000163344	Neurology	Q15126	OID20850	NPC1	0.2606	0.00134134	0.00758417	Significant	-2.74303	-2.57127	NPX ~ NPC1 * Age_c + Sex + Error(SampleID)	35	4.27
TNFRSF8	ENSG00000120949	Neurology	P28908	OID21049	Age_c	0.305035	0.000181202	0.00762379	Significant	0.370352	-0.0818359	NPX ~ NPC1 * Age_c + Sex + Error(SampleID)		0.45
PGA4	ENSG00000229183	Inflammation_II	P0DJD7	OID30699	NPC1	0.234647	0.00135162	0.00762719	Significant	-0.277653	-0.353507	NPX ~ NPC1 * Age_c + Sex + Error(SampleID)	39	0.10
ARHGEF12	ENSG00000196914	Inflammation	Q9NZN5	OID20554	NPC1	0.202823	0.00137079	0.00772013	Significant	-2.62727	-2.35244	NPX ~ NPC1 * Age_c + Sex + Error(SampleID)	37	4.43
PPIF	ENSG00000108179	Cardiometabolic_II	P30405	OID30385	NPC1	0.235218	0.00140295	0.00788575	Significant	-1.50396	-1.54994	NPX ~ NPC1 * Age_c + Sex + Error(SampleID)	39	1.85
CD80	ENSG00000121594	Cardiometabolic_II	P33681	OID30291	Age_c	0.309989	0.000190633	0.00790435	Significant	1.40329	-0.0503933	NPX ~ NPC1 * Age_c + Sex + Error(SampleID)		0.17
CLEC4D	ENSG00000166527	Inflammation	Q8WXI8	OID20609	NPC1	0.215601	0.00141546	0.00794046	Significant	-1.04908	-1.04503	NPX ~ NPC1 * Age_c + Sex + Error(SampleID)	37	0.88
TIMP1	ENSG00000102265	Cardiometabolic	P01033	OID20418	NPC1	0.234166	0.00142027	0.00795186	Significant	-0.360003	-0.382494	NPX ~ NPC1 * Age_c + Sex + Error(SampleID)	39	0.11
MED18	ENSG00000130772	Oncology	Q9BUE0	OID21236	NPC1	0.248064	0.00144438	0.00803009	Significant	-1.29825	-1.16253	NPX ~ NPC1 * Age_c + Sex + Error(SampleID)	36	0.97
STXBP3	ENSG00000116266	Oncology	O00186	OID21240	NPC1	0.24843	0.00143707	0.00803009	Significant	-1.21483	-1.13674	NPX ~ NPC1 * Age_c + Sex + Error(SampleID)	36	0.92
ALDH5A1	ENSG00000112294	Neurology_II	P51649	OID31047	NPC1	0.234616	0.00144547	0.00803009	Significant	1.18111	1.12613	NPX ~ NPC1 * Age_c + Sex + Error(SampleID)	39	0.98
F11R	ENSG00000158769	Neurology	Q9Y624	OID21151	NPC1	0.235421	0.00144191	0.00803009	Significant	-0.769569	-0.677142	NPX ~ NPC1 * Age_c + Sex + Error(SampleID)	39	0.35
FUT8	ENSG00000033170	Neurology	Q9BYC5	OID20992	NPC1	0.230469	0.00145956	0.00809263	Significant	-0.678664	-0.641239	NPX ~ NPC1 * Age_c + Sex + Error(SampleID)	38	0.32
RBP2	ENSG00000114113	Oncology	P50120	OID21365	NPC1	0.242577	0.00147425	0.00815826	Significant	1.0295	1.00109	NPX ~ NPC1 * Age_c + Sex + Error(SampleID)	37	0.74
QDPR	ENSG00000151552	Cardiometabolic	P09417	OID20174	NPC1	0.231664	0.0014903	0.00823116	Significant	0.767479	0.788393	NPX ~ NPC1 * Age_c + Sex + Error(SampleID)	39	0.48
GRK5	ENSG00000198873	Cardiometabolic	P34947	OID20066	NPC1	0.242014	0.00149719	0.0082533	Significant	-0.932935	-0.809176	NPX ~ NPC1 * Age_c + Sex + Error(SampleID)	32	0.44
PENK	ENSG00000181195	Inflammation_II	P01210	OID30666	Age_c	0.301286	0.000202332	0.0082696	Significant	0.334148	-0.0698538	NPX ~ NPC1 * Age_c + Sex + Error(SampleID)		0.33
GP1BB	ENSG00000203618	Cardiometabolic_II	P13224	OID30174	NPC1	0.233772	0.00150786	0.00829611	Significant	-2.15518	-1.92362	NPX ~ NPC1 * Age_c + Sex + Error(SampleID)	39	2.89
ITGB6	ENSG00000115221	Inflammation	P18564	OID20493	NPC1	0.246739	0.00151469	0.00830178	Significant	-0.572308	-0.531284	NPX ~ NPC1 * Age_c + Sex + Error(SampleID)	36	0.18
NDUFB7	ENSG00000099795	Oncology_II	P17568	OID31521	NPC1	0.23455	0.0015142	0.00830178	Significant	-0.557696	-0.457584	NPX ~ NPC1 * Age_c + Sex + Error(SampleID)	39	0.16
WASF1	ENSG00000112290	Cardiometabolic	Q92558	OID20091	NPC1	0.237698	0.00155082	0.00848356	Significant	-0.926946	-0.828009	NPX ~ NPC1 * Age_c + Sex + Error(SampleID)	32	0.46
JAM3	ENSG00000166086	Inflammation_II	Q9BX67	OID30586	NPC1	0.231776	0.0015696	0.0085699	Significant	-0.577956	-0.501165	NPX ~ NPC1 * Age_c + Sex + Error(SampleID)	39	0.20
ERP29	ENSG00000089248	Inflammation_II	P30040	OID30578	NPC1	0.23312	0.00158181	0.00862009	Significant	-1.99012	-1.6254	NPX ~ NPC1 * Age_c + Sex + Error(SampleID)	39	2.08
LILRB5	ENSG00000105609	Cardiometabolic	O75023	OID20324	NPC1	0.230243	0.00158814	0.00863818	Significant	1.18442	1.25634	NPX ~ NPC1 * Age_c + Sex + Error(SampleID)	39	1.25
SLC9A3R1		Inflammation_II	O14745	OID30630	NPC1	0.231647	0.00159217	0.00864365	Significant	-1.50198	-1.30071	NPX ~ NPC1 * Age_c + Sex + Error(SampleID)	39	1.34
SERPINE2	ENSG00000135919	Cardiometabolic_II	P07093	OID30359	NPC1	0.248421	0.00159785	0.00865805	Significant	-1.126	-1.03112	NPX ~ NPC1 * Age_c + Sex + Error(SampleID)	38	0.80
NID1	ENSG00000116962	Cardiometabolic	P14543	OID20362	NPC1	0.230789	0.00160537	0.00868236	Significant	-0.592958	-0.521672	NPX ~ NPC1 * Age_c + Sex + Error(SampleID)	39	0.22
HEG1	ENSG00000173706	Inflammation_II	Q9ULI3	OID30579	NPC1	0.227279	0.00161901	0.0087396	Significant	0.359121	0.497918	NPX ~ NPC1 * Age_c + Sex + Error(SampleID)	39	0.20
S100A16	ENSG00000188643	Neurology	Q96FQ6	OID20878	NPC1	0.252166	0.00162495	0.00875515	Significant	-0.881472	-0.904736	NPX ~ NPC1 * Age_c + Sex + Error(SampleID)	35	0.55
AP3S2	ENSG00000157823	Neurology_II	P59780	OID31117	NPC1	0.232102	0.00162803	0.00875526	Significant	-1.54474	-1.25054	NPX ~ NPC1 * Age_c + Sex + Error(SampleID)	39	1.24
ITGA11	ENSG00000137809	Inflammation	Q9UKX5	OID20581	Age_c	0.311989	0.000219503	0.00884506	Significant	-0.143437	-0.0504597	NPX ~ NPC1 * Age_c + Sex + Error(SampleID)		0.17
GTPBP2	ENSG00000172432	Neurology_II	Q9BX10	OID30946	NPC1	0.230426	0.0016695	0.00895273	Significant	-3.54745	-2.77094	NPX ~ NPC1 * Age_c + Sex + Error(SampleID)	35	5.36
EHD3	ENSG00000013016	Cardiometabolic_II	Q9NZN3	OID30229	NPC1	0.234258	0.00167101	0.00895273	Significant	-2.25723	-1.73124	NPX ~ NPC1 * Age_c + Sex + Error(SampleID)	38	2.27
LEPR	ENSG00000116678	Cardiometabolic	P48357	OID20128	Age_c	0.297443	0.000226434	0.00899759	Significant	0.244946	-0.0627885	NPX ~ NPC1 * Age_c + Sex + Error(SampleID)		0.27
CDHR2	ENSG00000074276	Oncology	Q9BYE9	OID21282	NPC1	0.237913	0.00169663	0.00907299	Significant	1.0074	1.04132	NPX ~ NPC1 * Age_c + Sex + Error(SampleID)	37	0.82
LRRN1	ENSG00000175928	Inflammation	Q6UXK5	OID20438	NPC1	0.241956	0.00171065	0.0091139	Significant	-0.612665	-0.534432	NPX ~ NPC1 * Age_c + Sex + Error(SampleID)	36	0.18
PTPRK	ENSG00000152894	Oncology_II	Q15262	OID31461	NPC1	0.226788	0.00171032	0.0091139	Significant	0.480032	0.521127	NPX ~ NPC1 * Age_c + Sex + Error(SampleID)	39	0.22
TEX101	ENSG00000131126	Neurology_II	Q9BY14	OID30971	Sex	0.401437	2.56054e-05	0.00915713	Significant	0.560713	0.80595	NPX ~ NPC1 * Age_c + Sex + Error(SampleID)		1.04
PPIB	ENSG00000166794	Cardiometabolic	P23284	OID20331	NPC1	0.227807	0.00175796	0.00934854	Significant	-2.05236	-1.77578	NPX ~ NPC1 * Age_c + Sex + Error(SampleID)	39	2.54
IL2RG	ENSG00000147168	Oncology_II	P31785	OID31361	NPC1	0.223978	0.00178861	0.00949388	Significant	0.621237	0.773776	NPX ~ NPC1 * Age_c + Sex + Error(SampleID)	39	0.48
F7	ENSG00000057593	Cardiometabolic	P08709	OID20372	NPC1	0.227841	0.00179334	0.0095014	Significant	0.362357	0.296173	NPX ~ NPC1 * Age_c + Sex + Error(SampleID)	39	0.07
SLC16A1	ENSG00000155380	Neurology	P53985	OID20799	NPC1	0.247836	0.00185862	0.00982906	Significant	-1.47514	-1.24395	NPX ~ NPC1 * Age_c + Sex + Error(SampleID)	35	1.07
LACRT	ENSG00000135413	Oncology_II	Q9GZZ8	OID31367	Age_c	0.293124	0.000256806	0.00992867	Significant	1.06675	-0.147525	NPX ~ NPC1 * Age_c + Sex + Error(SampleID)		1.55
PLAT	ENSG00000104368	Cardiometabolic	P00750	OID20247	Age_c	0.293392	0.000254814	0.00992867	Significant	0.260166	0.079426	NPX ~ NPC1 * Age_c + Sex + Error(SampleID)		0.45
DEFB4A_DEFB4B		Oncology	O15263	OID21373	Age_c	0.305362	0.00026455	0.00993053	Significant	0.785282	0.129468	NPX ~ NPC1 * Age_c + Sex + Error(SampleID)		1.18
EDDM3B	ENSG00000181552	Oncology_II	P56851	OID31365	Age_c	0.29184	0.000266559	0.00993053	Significant	0.522518	0.103366	NPX ~ NPC1 * Age_c + Sex + Error(SampleID)		0.77
TFF2	ENSG00000160181	Inflammation	Q03403	OID20787	Age_c	0.291749	0.000267267	0.00993053	Significant	0.403632	-0.0495632	NPX ~ NPC1 * Age_c + Sex + Error(SampleID)		0.18
CSPG5	ENSG00000114646	Neurology_II	O95196	OID30843	Age_c	0.297196	0.000275245	0.0100316	Significant	0.769164	-0.108635	NPX ~ NPC1 * Age_c + Sex + Error(SampleID)		0.81
ROBO2	ENSG00000185008	Neurology	Q9HCK4	OID21007	Age_c	0.290515	0.000277	0.0100316	Significant	0.0123417	-0.0420896	NPX ~ NPC1 * Age_c + Sex + Error(SampleID)		0.13
CCL21	ENSG00000137077	Inflammation	O00585	OID20686	NPC1	0.222819	0.00193515	0.0102149	Significant	0.707778	0.72771	NPX ~ NPC1 * Age_c + Sex + Error(SampleID)	39	0.44
BMP10	ENSG00000163217	Inflammation_II	O95393	OID30575	Age_c	0.288513	0.000293525	0.0103707	Significant	0.220201	-0.0456978	NPX ~ NPC1 * Age_c + Sex + Error(SampleID)		0.15
ERBB3	ENSG00000065361	Inflammation	P21860	OID20705	Age_c	0.288503	0.000293614	0.0103707	Significant	0.0561567	-0.0262657	NPX ~ NPC1 * Age_c + Sex + Error(SampleID)		0.05
CLEC4M	ENSG00000104938	Cardiometabolic_II	Q9H2X3	OID30405	NPC1	0.222702	0.00198413	0.0104541	Significant	-0.361076	-0.383945	NPX ~ NPC1 * Age_c + Sex + Error(SampleID)	39	0.12
BCAN	ENSG00000132692	Neurology	Q96GW7	OID20998	Age_c	0.293398	0.000306629	0.0106232	Significant	0.248833	-0.0519186	NPX ~ NPC1 * Age_c + Sex + Error(SampleID)		0.20
ENDOU	ENSG00000111405	Oncology_II	P21128	OID31498	Age_c	0.286825	0.000308189	0.0106232	Significant	-0.178595	0.0495884	NPX ~ NPC1 * Age_c + Sex + Error(SampleID)		0.18
TNFRSF13B	ENSG00000240505	Inflammation	O14836	OID20702	NPC1	0.219134	0.00204744	0.0107679	Significant	0.355621	0.396201	NPX ~ NPC1 * Age_c + Sex + Error(SampleID)	39	0.13
TJAP1	ENSG00000137221	Oncology	Q5JTD0	OID21477	NPC1	0.222243	0.00210268	0.0110381	Significant	-1.41567	-1.16181	NPX ~ NPC1 * Age_c + Sex + Error(SampleID)	39	1.13
CEND1	ENSG00000184524	Neurology_II	Q8N111	OID30821	Age_c	0.291387	0.000324604	0.0110559	Significant	2.07793	-0.0916722	NPX ~ NPC1 * Age_c + Sex + Error(SampleID)		0.60
IL4	ENSG00000113520	Inflammation	P05112	OID20426	NPC1	0.233149	0.00214048	0.0112159	Significant	-3.37526	-2.8707	NPX ~ NPC1 * Age_c + Sex + Error(SampleID)	36	5.58
PSTPIP2	ENSG00000152229	Inflammation_II	Q9H939	OID30596	NPC1	0.221705	0.00214569	0.0112227	Significant	-2.10995	-1.7781	NPX ~ NPC1 * Age_c + Sex + Error(SampleID)	39	2.66
DRAXIN	ENSG00000162490	Neurology	Q8NBI3	OID20917	NPC1	0.223504	0.00216292	0.0112922	Significant	0.871732	1.00874	NPX ~ NPC1 * Age_c + Sex + Error(SampleID)	38	0.87
MYBPC1	ENSG00000196091	Cardiometabolic_II	Q00872	OID30296	Age_c	0.290167	0.000335999	0.0113093	Significant	-0.164577	0.140343	NPX ~ NPC1 * Age_c + Sex + Error(SampleID)		1.46
SHBG	ENSG00000129214	Inflammation_II	P04278	OID30685	NPC1	0.212577	0.00217115	0.0113145	Significant	0.575288	0.926709	NPX ~ NPC1 * Age_c + Sex + Error(SampleID)	39	0.73
RAB2B	ENSG00000129472	Oncology_II	Q8WUD1	OID31362	NPC1	0.221025	0.00220321	0.0114607	Significant	-2.32818	-1.84344	NPX ~ NPC1 * Age_c + Sex + Error(SampleID)	39	2.88
LIFR	ENSG00000113594	Inflammation	P42702	OID20606	NPC1	0.236985	0.00220725	0.0114609	Significant	0.251645	0.283032	NPX ~ NPC1 * Age_c + Sex + Error(SampleID)	37	0.07
IL12A_IL12B		Oncology	P29459_P29460	OID21327	NPC1	0.225075	0.00227727	0.011803	Significant	1.00702	1.14692	NPX ~ NPC1 * Age_c + Sex + Error(SampleID)	37	1.06
CD22	ENSG00000012124	Inflammation	P20273	OID20637	Age_c	0.294327	0.000359781	0.011969	Significant	0.89501	-0.0605873	NPX ~ NPC1 * Age_c + Sex + Error(SampleID)		0.23
NRGN	ENSG00000154146	Inflammation_II	Q92686	OID30674	NPC1	0.217692	0.00231882	0.0119966	Significant	-1.2483	-1.11862	NPX ~ NPC1 * Age_c + Sex + Error(SampleID)	39	1.07
TNFRSF21	ENSG00000146072	Neurology	O75509	OID21052	NPC1	0.216562	0.00232442	0.0120039	Significant	0.371153	0.349245	NPX ~ NPC1 * Age_c + Sex + Error(SampleID)	39	0.10
DNAJB8	ENSG00000179407	Cardiometabolic	Q8NHS0	OID20093	NPC1	0.225635	0.00235699	0.0121502	Significant	-1.07886	-0.902354	NPX ~ NPC1 * Age_c + Sex + Error(SampleID)	32	0.60
CSF2RB	ENSG00000100368	Inflammation_II	P32927	OID30553	NPC1	0.213743	0.00240215	0.0123607	Significant	0.555435	0.652783	NPX ~ NPC1 * Age_c + Sex + Error(SampleID)	39	0.37
CXCL3	ENSG00000163734	Inflammation	P19876	OID20788	NPC1	0.215098	0.00246541	0.0126634	Significant	-1.68546	-1.50234	NPX ~ NPC1 * Age_c + Sex + Error(SampleID)	39	1.96
CR1	ENSG00000203710	Inflammation_II	P17927	OID30697	Age_c	0.278675	0.00038945	0.0128071	Significant	0.472392	-0.0499995	NPX ~ NPC1 * Age_c + Sex + Error(SampleID)		0.19
DBNL	ENSG00000136279	Inflammation	Q9UJU6	OID20681	NPC1	0.215244	0.00252129	0.0128811	Significant	-2.51198	-2.11718	NPX ~ NPC1 * Age_c + Sex + Error(SampleID)	39	3.91
IGFBP2	ENSG00000115457	Cardiometabolic	P18065	OID20325	NPC1	0.207213	0.00251687	0.0128811	Significant	0.459987	0.748607	NPX ~ NPC1 * Age_c + Sex + Error(SampleID)	39	0.49
SIGLEC6	ENSG00000105492	Oncology	O43699	OID21394	NPC1	0.219933	0.00251828	0.0128811	Significant	0.294451	0.414071	NPX ~ NPC1 * Age_c + Sex + Error(SampleID)	38	0.15
ODAM	ENSG00000109205	Neurology	A1E959	OID20793	NPC1	0.230984	0.00252947	0.0128998	Significant	0.761296	1.25378	NPX ~ NPC1 * Age_c + Sex + Error(SampleID)	35	1.16
ANXA3	ENSG00000138772	Neurology	P12429	OID21036	NPC1	0.215061	0.00256221	0.0129743	Significant	-1.81608	-1.53019	NPX ~ NPC1 * Age_c + Sex + Error(SampleID)	39	2.05
RALB	ENSG00000144118	Inflammation_II	P11234	OID30567	NPC1	0.216082	0.00254975	0.0129743	Significant	-1.89695	-1.45203	NPX ~ NPC1 * Age_c + Sex + Error(SampleID)	39	1.85
TFF1	ENSG00000160182	Neurology	P04155	OID21154	NPC1	0.208204	0.00255591	0.0129743	Significant	0.464055	0.557245	NPX ~ NPC1 * Age_c + Sex + Error(SampleID)	39	0.27
ITIH3	ENSG00000162267	Cardiometabolic	Q06033	OID20352	NPC1	0.206981	0.00256024	0.0129743	Significant	0.392279	0.500318	NPX ~ NPC1 * Age_c + Sex + Error(SampleID)	39	0.22
DNER	ENSG00000187957	Inflammation	Q8NFT8	OID20712	NPC1	0.207853	0.002578	0.0130312	Significant	0.182004	0.349424	NPX ~ NPC1 * Age_c + Sex + Error(SampleID)	39	0.11
SLITRK1	ENSG00000178235	Inflammation_II	Q96PX8	OID30510	NPC1	0.205867	0.00261135	0.0131765	Significant	0.325596	0.658009	NPX ~ NPC1 * Age_c + Sex + Error(SampleID)	39	0.38
MCEMP1	ENSG00000183019	Inflammation_II	Q8IX19	OID30501	NPC1	0.213498	0.0026246	0.0132071	Significant	-1.86961	-1.70051	NPX ~ NPC1 * Age_c + Sex + Error(SampleID)	39	2.55
TNFRSF13C	ENSG00000159958	Inflammation	Q96RJ3	OID20480	NPC1	0.224952	0.00262665	0.0132071	Significant	0.437959	0.757142	NPX ~ NPC1 * Age_c + Sex + Error(SampleID)	36	0.41
DNAJA2	ENSG00000069345	Inflammation	O60884	OID20627	NPC1	0.218738	0.00263653	0.0132336	Significant	-2.40233	-2.09351	NPX ~ NPC1 * Age_c + Sex + Error(SampleID)	37	3.79
IGFBP4	ENSG00000141753	Neurology	P22692	OID21158	Age_c	0.277117	0.000407169	0.0132376	Significant	0.164065	0.0397425	NPX ~ NPC1 * Age_c + Sex + Error(SampleID)		0.12
CTBS	ENSG00000117151	Inflammation_II	Q01459	OID30710	Age_c	0.276461	0.000414861	0.0133361	Significant	-0.0491133	0.0234866	NPX ~ NPC1 * Age_c + Sex + Error(SampleID)		0.04
CRKL	ENSG00000099942	Inflammation	P46109	OID20742	NPC1	0.212831	0.00266293	0.0133426	Significant	-2.61406	-2.2491	NPX ~ NPC1 * Age_c + Sex + Error(SampleID)	39	4.47
TMEM25	ENSG00000149582	Neurology_II	Q86YD3	OID31015	NPC1	0.207726	0.00270391	0.0135243	Significant	0.645057	0.808019	NPX ~ NPC1 * Age_c + Sex + Error(SampleID)	39	0.58
GUK1	ENSG00000143774	Cardiometabolic_II	Q16774	OID30148	NPC1	0.212786	0.0027156	0.0135591	Significant	-0.994722	-0.80691	NPX ~ NPC1 * Age_c + Sex + Error(SampleID)	39	0.58
ENG	ENSG00000106991	Cardiometabolic	P17813	OID20287	NPC1	0.20687	0.00275642	0.0137389	Significant	0.124176	0.1883	NPX ~ NPC1 * Age_c + Sex + Error(SampleID)	39	0.03
MMP13	ENSG00000137745	Neurology	P45452	OID20807	Age_c	0.301457	0.00043307	0.0137668	Significant	-0.182283	-0.11427	NPX ~ NPC1 * Age_c + Sex + Error(SampleID)		0.87
VGF	ENSG00000128564	Neurology_II	O15240	OID31067	Age_c	0.273912	0.000446081	0.0138722	Significant	0.335417	-0.071847	NPX ~ NPC1 * Age_c + Sex + Error(SampleID)		0.40
CPA2	ENSG00000158516	Neurology	P48052	OID21060	Age_c	0.274252	0.000441795	0.0138722	Significant	-0.0689958	-0.0699685	NPX ~ NPC1 * Age_c + Sex + Error(SampleID)		0.38
ARF6	ENSG00000165527	Oncology_II	P62330	OID31523	NPC1	0.212178	0.00279058	0.0138849	Significant	-3.39103	-2.72215	NPX ~ NPC1 * Age_c + Sex + Error(SampleID)	39	6.62
LPCAT2	ENSG00000087253	Oncology	Q7L5N7	OID21290	NPC1	0.217989	0.00283356	0.0140743	Significant	-1.05138	-0.912801	NPX ~ NPC1 * Age_c + Sex + Error(SampleID)	37	0.71
IL1B	ENSG00000125538	Inflammation	P01584	OID20427	NPC1	0.221831	0.00284642	0.0141137	Significant	-3.12059	-2.28759	NPX ~ NPC1 * Age_c + Sex + Error(SampleID)	36	3.78
VPS4B	ENSG00000119541	Oncology_II	O75351	OID31386	NPC1	0.210889	0.00287405	0.014177	Significant	-2.70716	-2.22573	NPX ~ NPC1 * Age_c + Sex + Error(SampleID)	39	4.46
PSIP1	ENSG00000164985	Inflammation	O75475	OID20534	NPC1	0.197011	0.00286758	0.014177	Significant	-1.31882	-1.35836	NPX ~ NPC1 * Age_c + Sex + Error(SampleID)	37	1.73
RBKS	ENSG00000171174	Neurology	Q9H477	OID20986	NPC1	0.20847	0.00287379	0.014177	Significant	0.90422	0.977041	NPX ~ NPC1 * Age_c + Sex + Error(SampleID)	38	0.87
CRTAC1	ENSG00000095713	Cardiometabolic	Q9NQ79	OID20279	NPC1	0.211944	0.00291437	0.0143511	Significant	-0.293561	-0.280235	NPX ~ NPC1 * Age_c + Sex + Error(SampleID)	39	0.07
ATXN10	ENSG00000130638	Neurology	Q9UBB4	OID20865	NPC1	0.229691	0.00292817	0.0143943	Significant	-1.0407	-0.904091	NPX ~ NPC1 * Age_c + Sex + Error(SampleID)	35	0.63
PROK1	ENSG00000143125	Inflammation	P58294	OID20543	NPC1:Age_c	0.413594	1.00848e-05	0.0144263	Significant	0.472736	-0.150579	NPX ~ NPC1 * Age_c + Sex + Error(SampleID)		1.00
IGFBP6	ENSG00000167779	Cardiometabolic	P24592	OID20413	NPC1:Age_c	0.402685	8.36684e-06	0.0144263	Significant	-0.21043	-0.0402896	NPX ~ NPC1 * Age_c + Sex + Error(SampleID)		0.07
GDNF	ENSG00000168621	Neurology	P39905	OID20861	NPC1	0.227102	0.00298326	0.01464	Significant	0.683075	0.650627	NPX ~ NPC1 * Age_c + Sex + Error(SampleID)	35	0.33
GNPDA2	ENSG00000163281	Inflammation_II	Q8TDQ7	OID30597	NPC1	0.208157	0.00298985	0.0146472	Significant	-0.582447	-0.525354	NPX ~ NPC1 * Age_c + Sex + Error(SampleID)	39	0.25
SERPINA12	ENSG00000165953	Cardiometabolic	Q8IW75	OID20219	NPC1	0.209151	0.00301959	0.0147676	Significant	0.892499	0.594869	NPX ~ NPC1 * Age_c + Sex + Error(SampleID)	39	0.32
FIS1	ENSG00000214253	Inflammation	Q9Y3D6	OID20722	NPC1	0.208116	0.00303565	0.0148208	Significant	-1.45542	-1.17123	NPX ~ NPC1 * Age_c + Sex + Error(SampleID)	39	1.25
LBR	ENSG00000143815	Neurology	Q14739	OID21034	NPC1	0.208296	0.00304702	0.014851	Significant	-1.65942	-1.3966	NPX ~ NPC1 * Age_c + Sex + Error(SampleID)	39	1.78
MMP3	ENSG00000149968	Neurology	P08254	OID21083	NPC1:Age_c	0.383931	1.56177e-05	0.0148941	Significant	-0.672432	-0.112247	NPX ~ NPC1 * Age_c + Sex + Error(SampleID)		0.60
IL10RA	ENSG00000110324	Inflammation	Q13651	OID20420	NPC1	0.218344	0.00310038	0.0150854	Significant	1.15076	1.14991	NPX ~ NPC1 * Age_c + Sex + Error(SampleID)	36	0.97
B4GAT1	ENSG00000174684	Neurology	O43505	OID21127	Age_c	0.270526	0.000491063	0.0151068	Significant	0.0356267	-0.0399291	NPX ~ NPC1 * Age_c + Sex + Error(SampleID)		0.13
ANXA4	ENSG00000196975	Cardiometabolic	P09525	OID20123	NPC1	0.207989	0.00312547	0.0151816	Significant	-1.19349	-0.960353	NPX ~ NPC1 * Age_c + Sex + Error(SampleID)	39	0.85
SV2A	ENSG00000159164	Neurology_II	Q7L0J3	OID30965	NPC1	0.200453	0.00313423	0.0151983	Significant	-2.66175	-1.8723	NPX ~ NPC1 * Age_c + Sex + Error(SampleID)	35	2.82
AMBN	ENSG00000178522	Inflammation	Q9NP70	OID20437	NPC1	0.217709	0.00314644	0.0152318	Significant	1.00431	1.91599	NPX ~ NPC1 * Age_c + Sex + Error(SampleID)	36	2.72
HPSE	ENSG00000173083	Cardiometabolic_II	Q9Y251	OID30409	NPC1	0.205015	0.00318825	0.0154081	Significant	-1.28605	-1.21354	NPX ~ NPC1 * Age_c + Sex + Error(SampleID)	39	1.36
REG3A	ENSG00000172016	Cardiometabolic	Q06141	OID20258	NPC1	0.201253	0.00325499	0.0156776	Significant	0.695701	0.737982	NPX ~ NPC1 * Age_c + Sex + Error(SampleID)	39	0.50
BMP10	ENSG00000163217	Inflammation_II	O95393	OID30575	NPC1	0.198037	0.00324982	0.0156776	Significant	0.220201	0.405209	NPX ~ NPC1 * Age_c + Sex + Error(SampleID)	39	0.15
SSH3	ENSG00000172830	Oncology_II	Q8TE77	OID31216	NPC1	0.203796	0.0033251	0.0159884	Significant	-0.662512	-0.579941	NPX ~ NPC1 * Age_c + Sex + Error(SampleID)	39	0.31
EPO	ENSG00000130427	Inflammation	P01588	OID20522	NPC1	0.208704	0.00333697	0.0160186	Significant	0.859274	0.956877	NPX ~ NPC1 * Age_c + Sex + Error(SampleID)	37	0.89
SAMD9L	ENSG00000177409	Inflammation	Q8IVG5	OID20536	NPC1	0.170451	0.00336009	0.0161026	Significant	-1.68495	-1.54175	NPX ~ NPC1 * Age_c + Sex + Error(SampleID)	37	2.32
GDF2	ENSG00000263761	Cardiometabolic	Q9UK05	OID20202	Age_c	0.267772	0.000530841	0.0161568	Significant	-0.0690783	-0.0447629	NPX ~ NPC1 * Age_c + Sex + Error(SampleID)		0.16
RBP1	ENSG00000114115	Neurology_II	P09455	OID30913	Sex	0.378197	5.12007e-05	0.0162761	Significant	0.995724	-0.571152	NPX ~ NPC1 * Age_c + Sex + Error(SampleID)		0.58
LYPD3	ENSG00000124466	Oncology	O95274	OID21530	NPC1	0.198851	0.00345199	0.0165153	Significant	0.262097	0.332888	NPX ~ NPC1 * Age_c + Sex + Error(SampleID)	39	0.10
F3	ENSG00000117525	Oncology	P13726	OID21440	NPC1	0.201409	0.00352244	0.0168242	Significant	0.438455	0.400399	NPX ~ NPC1 * Age_c + Sex + Error(SampleID)	38	0.15
MTDH	ENSG00000147649	Inflammation_II	Q86UE4	OID30538	NPC1	0.20289	0.00353849	0.0168498	Significant	-1.54485	-1.22963	NPX ~ NPC1 * Age_c + Sex + Error(SampleID)	39	1.43
ADAMTS13	ENSG00000160323	Cardiometabolic	Q76LX8	OID20249	NPC1	0.197824	0.00353957	0.0168498	Significant	0.223202	0.257256	NPX ~ NPC1 * Age_c + Sex + Error(SampleID)	39	0.06
F13B	ENSG00000143278	Inflammation_II	P05160	OID30781	NPC1	0.198674	0.003601	0.0171137	Significant	-0.208517	-0.222668	NPX ~ NPC1 * Age_c + Sex + Error(SampleID)	39	0.05
PRND	ENSG00000171864	Neurology_II	Q9UKY0	OID31124	NPC1	0.197108	0.00365592	0.0173459	Significant	0.623637	0.870075	NPX ~ NPC1 * Age_c + Sex + Error(SampleID)	39	0.72
GATD3	ENSG00000160221	Cardiometabolic_II	P0DPI2	OID30253	NPC1	0.202558	0.00366613	0.0173656	Significant	1.14497	1.14788	NPX ~ NPC1 * Age_c + Sex + Error(SampleID)	38	1.19
PXN	ENSG00000089159	Neurology	P49023	OID20822	NPC1	0.219518	0.00368905	0.0174164	Significant	-1.59447	-1.49782	NPX ~ NPC1 * Age_c + Sex + Error(SampleID)	35	1.82
ABL1	ENSG00000097007	Oncology	P00519	OID21280	NPC1	0.207352	0.00368569	0.0174164	Significant	-1.44083	-1.25621	NPX ~ NPC1 * Age_c + Sex + Error(SampleID)	37	1.43
CASP1	ENSG00000137752	Neurology	P29466	OID20854	NPC1	0.218576	0.00373573	0.0176078	Significant	-1.56098	-1.45841	NPX ~ NPC1 * Age_c + Sex + Error(SampleID)	35	1.73
ADAMTSL4	ENSG00000143382	Cardiometabolic_II	Q6UY14	OID30275	NPC1	0.199763	0.00377712	0.0177736	Significant	0.365034	0.385922	NPX ~ NPC1 * Age_c + Sex + Error(SampleID)	38	0.14
DARS1	ENSG00000115866	Neurology	P14868	OID20903	NPC1	0.19044	0.00379377	0.0178226	Significant	-1.8266	-1.63872	NPX ~ NPC1 * Age_c + Sex + Error(SampleID)	38	2.60
CNTN4	ENSG00000144619	Neurology	Q8IWV2	OID21117	Age_c	0.263838	0.000593053	0.0178603	Significant	0.0994725	-0.0331465	NPX ~ NPC1 * Age_c + Sex + Error(SampleID)		0.09
CALB1	ENSG00000104327	Oncology	P05937	OID21306	Sex	0.355018	6.28116e-05	0.0179704	Significant	1.55527	-0.368501	NPX ~ NPC1 * Age_c + Sex + Error(SampleID)		0.26
PDCD1	ENSG00000188389	Oncology	Q15116	OID21396	Age_c	0.268795	0.000610102	0.0180359	Significant	0.629996	-0.061809	NPX ~ NPC1 * Age_c + Sex + Error(SampleID)		0.31
FSTL3	ENSG00000070404	Inflammation	O95633	OID20782	Age_c	0.262748	0.000611493	0.0180359	Significant	0.157307	0.0400808	NPX ~ NPC1 * Age_c + Sex + Error(SampleID)		0.13
ERBIN	ENSG00000112851	Oncology	Q96RT1	OID21323	NPC1	0.205548	0.00384674	0.0180419	Significant	-1.75393	-1.5796	NPX ~ NPC1 * Age_c + Sex + Error(SampleID)	37	2.28
PI3	ENSG00000124102	Cardiometabolic	P19957	OID20326	NPC1:Age_c	0.363111	3.06101e-05	0.0182072	Significant	0.473807	-0.0661604	NPX ~ NPC1 * Age_c + Sex + Error(SampleID)		0.23
ADGRG2	ENSG00000173698	Cardiometabolic	Q8IZP9	OID20189	NPC1:Age_c	0.361892	3.18197e-05	0.0182072	Significant	-0.211318	0.0524454	NPX ~ NPC1 * Age_c + Sex + Error(SampleID)		0.14
HS3ST3B1	ENSG00000125430	Oncology	Q9Y662	OID21303	NPC1	0.204605	0.00394378	0.0184667	Significant	0.744435	0.569408	NPX ~ NPC1 * Age_c + Sex + Error(SampleID)	37	0.30
DPP6	ENSG00000130226	Oncology	P42658	OID21354	Age_c	0.273501	0.000635929	0.0185652	Significant	0.7031	-0.0619487	NPX ~ NPC1 * Age_c + Sex + Error(SampleID)		0.32
SPINK5	ENSG00000133710	Neurology	Q9NQ38	OID21148	Age_c	0.26082	0.00064548	0.0186537	Significant	-0.0354917	0.0325708	NPX ~ NPC1 * Age_c + Sex + Error(SampleID)		0.09
CCL4	ENSG00000275302	Inflammation	P13236	OID20695	NPC1	0.194015	0.00399948	0.0186969	Significant	0.700339	0.841549	NPX ~ NPC1 * Age_c + Sex + Error(SampleID)	39	0.69
CCN5	ENSG00000064205	Neurology	O76076	OID21068	NPC1:Age_c	0.355109	3.94357e-05	0.0188043	Significant	-0.830647	-0.129431	NPX ~ NPC1 * Age_c + Sex + Error(SampleID)		0.90
ITGB2	ENSG00000160255	Cardiometabolic	P05107	OID20315	NPC1	0.191095	0.00402969	0.0188074	Significant	0.225343	0.368112	NPX ~ NPC1 * Age_c + Sex + Error(SampleID)	39	0.13
LUZP2	ENSG00000187398	Oncology_II	Q86TE4	OID31402	Age_c	0.259281	0.000673906	0.018903	Significant	0.370926	-0.0736014	NPX ~ NPC1 * Age_c + Sex + Error(SampleID)		0.46
SCG2	ENSG00000171951	Oncology	P13521	OID21400	Age_c	0.265179	0.000673926	0.018903	Significant	0.475683	-0.0547395	NPX ~ NPC1 * Age_c + Sex + Error(SampleID)		0.25
C1QL2	ENSG00000144119	Inflammation_II	Q7Z5L3	OID30515	Age_c	0.259475	0.000670249	0.018903	Significant	0.042675	-0.0464818	NPX ~ NPC1 * Age_c + Sex + Error(SampleID)		0.18
KLK3	ENSG00000142515	Cardiometabolic_II	P07288	OID30364	Sex	0.331935	8.08717e-05	0.0192812	Significant	0.141923	0.53012	NPX ~ NPC1 * Age_c + Sex + Error(SampleID)		0.61
IL1RL1	ENSG00000115602	Cardiometabolic	Q01638	OID20250	Sex	0.333339	7.74768e-05	0.0192812	Significant	-0.0514158	0.39979	NPX ~ NPC1 * Age_c + Sex + Error(SampleID)		0.34
M6PR	ENSG00000003056	Cardiometabolic_II	P20645	OID30208	NPC1	0.197032	0.00418981	0.0194911	Significant	0.535236	0.670291	NPX ~ NPC1 * Age_c + Sex + Error(SampleID)	38	0.42
ARSA	ENSG00000100299	Neurology	P15289	OID21138	NPC1	0.193822	0.00418611	0.0194911	Significant	-0.452684	-0.441803	NPX ~ NPC1 * Age_c + Sex + Error(SampleID)	39	0.19
STK24	ENSG00000102572	Neurology	Q9Y6E0	OID20837	NPC1	0.21176	0.00421948	0.0195973	Significant	-0.632029	-0.819603	NPX ~ NPC1 * Age_c + Sex + Error(SampleID)	35	0.56
APLP1	ENSG00000105290	Cardiometabolic	P51693	OID20164	NPC1	0.190844	0.0042426	0.0196728	Significant	0.588352	0.70041	NPX ~ NPC1 * Age_c + Sex + Error(SampleID)	39	0.48
PBLD	ENSG00000108187	Neurology	P30039	OID20839	NPC1	0.211957	0.00428259	0.019794	Significant	0.771737	0.755052	NPX ~ NPC1 * Age_c + Sex + Error(SampleID)	35	0.48
TCOF1	ENSG00000070814	Cardiometabolic_II	Q13428	OID30316	NPC1	0.201713	0.00427958	0.019794	Significant	0.64125	0.677683	NPX ~ NPC1 * Age_c + Sex + Error(SampleID)	38	0.43
COL3A1	ENSG00000168542	Cardiometabolic_II	P02461	OID30379	NPC1	0.194386	0.00429807	0.0198335	Significant	-0.702605	-0.567167	NPX ~ NPC1 * Age_c + Sex + Error(SampleID)	39	0.32
MAPRE3	ENSG00000084764	Oncology_II	Q9UPY8	OID31177	NPC1	0.190704	0.00434591	0.020022	Significant	1.72507	1.83533	NPX ~ NPC1 * Age_c + Sex + Error(SampleID)	39	3.34
PTPRM	ENSG00000173482	Inflammation	P28827	OID20598	NPC1	0.193981	0.00448976	0.0206515	Significant	0.233703	0.265878	NPX ~ NPC1 * Age_c + Sex + Error(SampleID)	37	0.07
INSL3	ENSG00000248099	Neurology_II	P51460	OID31129	NPC1:Age_c	0.340211	6.27368e-05	0.0206771	Significant	0.360059	-0.213298	NPX ~ NPC1 * Age_c + Sex + Error(SampleID)		2.61
DEFB4A_DEFB4B		Oncology	O15263	OID21373	NPC1:Age_c	0.359189	5.54214e-05	0.0206771	Significant	0.785282	-0.146098	NPX ~ NPC1 * Age_c + Sex + Error(SampleID)		1.18
EPHA1	ENSG00000146904	Inflammation	P21709	OID20677	NPC1:Age_c	0.339039	6.50451e-05	0.0206771	Significant	0.302912	-0.0424305	NPX ~ NPC1 * Age_c + Sex + Error(SampleID)		0.10
MSRA	ENSG00000175806	Oncology	Q9UJ68	OID21513	NPC1	0.192509	0.00457607	0.0210146	Significant	-1.54771	-1.26328	NPX ~ NPC1 * Age_c + Sex + Error(SampleID)	39	1.60
KAZN	ENSG00000189337	Oncology_II	Q674X7	OID31481	NPC1	0.192447	0.00460868	0.0210967	Significant	-1.80344	-1.47545	NPX ~ NPC1 * Age_c + Sex + Error(SampleID)	39	2.19
CEACAM8	ENSG00000124469	Cardiometabolic	P31997	OID20102	NPC1	0.19523	0.00460592	0.0210967	Significant	-1.20815	-1.0167	NPX ~ NPC1 * Age_c + Sex + Error(SampleID)	32	0.90
MYLPF		Neurology_II	Q96A32	OID30917	Age_c	0.279155	0.000775669	0.0213384	Significant	0.596827	0.128479	NPX ~ NPC1 * Age_c + Sex + Error(SampleID)		1.28
LRTM2	ENSG00000166159	Neurology_II	Q8N967	OID31020	Age_c	0.254334	0.00077364	0.0213384	Significant	0.621301	-0.0671346	NPX ~ NPC1 * Age_c + Sex + Error(SampleID)		0.39
DGKA	ENSG00000065357	Inflammation_II	P23743	OID30546	NPC1	0.191554	0.00469599	0.0214278	Significant	-1.58277	-1.31445	NPX ~ NPC1 * Age_c + Sex + Error(SampleID)	39	1.75
LRRC59	ENSG00000108829	Cardiometabolic_II	Q96AG4	OID30361	NPC1	0.213004	0.00469585	0.0214278	Significant	-1.57766	-1.19054	NPX ~ NPC1 * Age_c + Sex + Error(SampleID)	38	1.36
LAT2	ENSG00000086730	Oncology	Q9GZY6	OID21292	NPC1	0.197542	0.00472681	0.0215341	Significant	-1.33944	-1.19704	NPX ~ NPC1 * Age_c + Sex + Error(SampleID)	37	1.38
APOL1	ENSG00000100342	Inflammation_II	O14791	OID30708	NPC1	0.186918	0.0048415	0.0219865	Significant	-0.873846	-0.840667	NPX ~ NPC1 * Age_c + Sex + Error(SampleID)	39	0.72
GRPEL1	ENSG00000109519	Oncology	Q9HAV7	OID21309	NPC1	0.195793	0.00483504	0.0219865	Significant	0.705674	0.735743	NPX ~ NPC1 * Age_c + Sex + Error(SampleID)	37	0.52
ST6GAL1	ENSG00000073849	Cardiometabolic	P15907	OID20302	NPC1	0.186209	0.00487021	0.0220819	Significant	-0.380568	-0.413756	NPX ~ NPC1 * Age_c + Sex + Error(SampleID)	39	0.17
TNFSF8	ENSG00000106952	Cardiometabolic_II	P32971	OID30384	Age_c	0.252622	0.000811349	0.0221073	Significant	1.42479	-0.045903	NPX ~ NPC1 * Age_c + Sex + Error(SampleID)		0.18
ARSB	ENSG00000113273	Oncology	P15848	OID21331	NPC1	0.195887	0.00489002	0.0221366	Significant	-0.9579	-0.872672	NPX ~ NPC1 * Age_c + Sex + Error(SampleID)	37	0.74
ECHS1	ENSG00000127884	Cardiometabolic_II	P30084	OID30239	NPC1	0.19095	0.00490013	0.0221474	Significant	1.226	1.27515	NPX ~ NPC1 * Age_c + Sex + Error(SampleID)	38	1.58
ADGRV1	ENSG00000164199	Neurology_II	Q8WXG9	OID30877	NPC1	0.185982	0.00492173	0.0222099	Significant	1.02923	1.23417	NPX ~ NPC1 * Age_c + Sex + Error(SampleID)	38	1.52
CC2D1A	ENSG00000132024	Neurology	Q6P1N0	OID20958	NPC1	0.178811	0.0049557	0.0222464	Significant	-2.30507	-1.9803	NPX ~ NPC1 * Age_c + Sex + Error(SampleID)	38	4.06
TOMM20	ENSG00000173726	Cardiometabolic_II	Q15388	OID30353	NPC1	0.201163	0.00494617	0.0222464	Significant	-1.39668	-1.32866	NPX ~ NPC1 * Age_c + Sex + Error(SampleID)	38	1.72
LIF	ENSG00000128342	Neurology	P15018	OID20824	NPC1	0.208482	0.00496093	0.0222464	Significant	-1.60765	-1.13224	NPX ~ NPC1 * Age_c + Sex + Error(SampleID)	35	1.12
GCHFR	ENSG00000137880	Inflammation_II	P30047	OID30631	NPC1	0.186327	0.00495778	0.0222464	Significant	1.20203	1.1153	NPX ~ NPC1 * Age_c + Sex + Error(SampleID)	39	1.28
SLAMF7	ENSG00000026751	Inflammation	Q9NQ25	OID20602	NPC1	0.158153	0.00503856	0.0225592	Significant	0.636434	0.605395	NPX ~ NPC1 * Age_c + Sex + Error(SampleID)	37	0.39
RBPMS	ENSG00000157110	Inflammation_II	Q93062	OID30507	NPC1	0.189635	0.00506236	0.022595	Significant	-2.82456	-2.1473	NPX ~ NPC1 * Age_c + Sex + Error(SampleID)	39	4.76
DIABLO	ENSG00000184047	Cardiometabolic	Q9NR28	OID20184	NPC1	0.189434	0.00505933	0.022595	Significant	-1.63712	-1.30771	NPX ~ NPC1 * Age_c + Sex + Error(SampleID)	39	1.76
IL1RN	ENSG00000136689	Inflammation	P18510	OID20700	NPC1	0.186387	0.00507236	0.0226044	Significant	-0.970842	-0.979392	NPX ~ NPC1 * Age_c + Sex + Error(SampleID)	39	0.99
TG	ENSG00000042832	Oncology_II	P01266	OID31359	Age_c	0.25116	0.000844967	0.0228061	Significant	0.918632	0.109912	NPX ~ NPC1 * Age_c + Sex + Error(SampleID)		1.06
FGF5	ENSG00000138675	Inflammation	P12034	OID20490	NPC1	0.197893	0.00513925	0.0228668	Significant	-0.472123	-0.622071	NPX ~ NPC1 * Age_c + Sex + Error(SampleID)	36	0.32
MFAP5	ENSG00000197614	Cardiometabolic	Q13361	OID20239	NPC1:Age_c	0.332277	8.0032e-05	0.0228972	Significant	-0.321366	-0.0736563	NPX ~ NPC1 * Age_c + Sex + Error(SampleID)		0.32
ITGB7	ENSG00000139626	Oncology	P26010	OID21393	Age_c	0.256401	0.000856713	0.0229071	Significant	0.70796	-0.049105	NPX ~ NPC1 * Age_c + Sex + Error(SampleID)		0.21
GMFG	ENSG00000130755	Cardiometabolic_II	O60234	OID30340	NPC1	0.208015	0.00517184	0.0229761	Significant	-2.24498	-1.83938	NPX ~ NPC1 * Age_c + Sex + Error(SampleID)	38	3.33
NRXN3	ENSG00000021645	Neurology_II	Q9Y4C0	OID30901	NPC1	0.201067	0.0051961	0.0230481	Significant	0.472269	0.57489	NPX ~ NPC1 * Age_c + Sex + Error(SampleID)	35	0.30
KLK3	ENSG00000142515	Cardiometabolic_II	P07288	OID30364	Age_c	0.250088	0.000870445	0.0230587	Significant	0.141923	0.0827638	NPX ~ NPC1 * Age_c + Sex + Error(SampleID)		0.61
GGACT	ENSG00000134864	Cardiometabolic_II	Q9BVM4	OID30290	NPC1	0.203417	0.00520861	0.0230679	Significant	-1.83091	-1.6364	NPX ~ NPC1 * Age_c + Sex + Error(SampleID)	38	2.64
NXPH3	ENSG00000182575	Inflammation_II	O95157	OID30565	Age_c	0.248725	0.000903914	0.0233313	Significant	0.110559	-0.0822787	NPX ~ NPC1 * Age_c + Sex + Error(SampleID)		0.60
ITGA2	ENSG00000164171	Inflammation_II	P17301	OID30570	Age_c	0.248522	0.00090902	0.0233313	Significant	-0.567336	-0.0717448	NPX ~ NPC1 * Age_c + Sex + Error(SampleID)		0.46
CFHR5	ENSG00000134389	Inflammation_II	Q9BXR6	OID30716	Age_c	0.248028	0.000921507	0.0233313	Significant	-0.380867	0.0364593	NPX ~ NPC1 * Age_c + Sex + Error(SampleID)		0.12
ITGAV	ENSG00000138448	Oncology	P06756	OID21416	Age_c	0.254756	0.000895898	0.0233313	Significant	-0.196542	-0.0273872	NPX ~ NPC1 * Age_c + Sex + Error(SampleID)		0.07
SERPINF1	ENSG00000132386	Inflammation_II	P36955	OID30757	Age_c	0.248076	0.000920297	0.0233313	Significant	-0.0699775	0.0195727	NPX ~ NPC1 * Age_c + Sex + Error(SampleID)		0.03
NCK2	ENSG00000071051	Inflammation	O43639	OID20683	NPC1	0.186669	0.00528483	0.0233692	Significant	-0.589228	-0.535048	NPX ~ NPC1 * Age_c + Sex + Error(SampleID)	39	0.30
PRKCQ	ENSG00000065675	Inflammation	Q04759	OID20468	NPC1	0.196297	0.00534541	0.0236007	Significant	-1.01906	-1.03171	NPX ~ NPC1 * Age_c + Sex + Error(SampleID)	36	0.90
RBP1	ENSG00000114115	Neurology_II	P09455	OID30913	NPC1	0.194863	0.00537883	0.0237116	Significant	0.995724	0.791709	NPX ~ NPC1 * Age_c + Sex + Error(SampleID)	35	0.58
TNFRSF9	ENSG00000049249	Neurology	Q07011	OID20985	Age_c	0.252627	0.000949178	0.023821	Significant	0.551305	-0.0520043	NPX ~ NPC1 * Age_c + Sex + Error(SampleID)		0.24
IL31RA	ENSG00000164509	Inflammation_II	Q8NI17	OID30475	NPC1	0.179541	0.00541391	0.0238295	Significant	0.398927	0.827475	NPX ~ NPC1 * Age_c + Sex + Error(SampleID)	39	0.72
SNX9	ENSG00000130340	Cardiometabolic	Q9Y5X1	OID20135	NPC1	0.185667	0.00544615	0.0239346	Significant	-1.62701	-1.4006	NPX ~ NPC1 * Age_c + Sex + Error(SampleID)	39	2.06
FOXO1	ENSG00000150907	Inflammation	Q12778	OID20515	NPC1	0.164409	0.00546187	0.0239669	Significant	-0.918184	-0.938447	NPX ~ NPC1 * Age_c + Sex + Error(SampleID)	37	0.97
SORCS2	ENSG00000184985	Oncology	Q96PQ0	OID21262	NPC1	0.195238	0.00549369	0.0240696	Significant	0.668384	0.63869	NPX ~ NPC1 * Age_c + Sex + Error(SampleID)	36	0.40
CD33	ENSG00000105383	Oncology	P20138	OID21472	NPC1	0.183297	0.00550654	0.024089	Significant	0.903681	0.815933	NPX ~ NPC1 * Age_c + Sex + Error(SampleID)	39	0.70
SDCCAG8	ENSG00000054282	Oncology_II	Q86SQ7	OID31423	NPC1	0.185107	0.00555217	0.0242344	Significant	-1.60078	-1.32384	NPX ~ NPC1 * Age_c + Sex + Error(SampleID)	39	1.85
KDR	ENSG00000128052	Oncology	P35968	OID21497	NPC1	0.183094	0.00555671	0.0242344	Significant	-0.374243	-0.317626	NPX ~ NPC1 * Age_c + Sex + Error(SampleID)	39	0.11
FABP9	ENSG00000205186	Inflammation	Q0Z7S8	OID20501	NPC1	0.180152	0.00559312	0.024356	Significant	-0.587663	-0.543714	NPX ~ NPC1 * Age_c + Sex + Error(SampleID)	37	0.33
GBP1	ENSG00000117228	Neurology_II	P32455	OID31128	NPC1	0.181027	0.00561316	0.0244061	Significant	0.845206	0.978002	NPX ~ NPC1 * Age_c + Sex + Error(SampleID)	39	1.01
PINLYP	ENSG00000234465	Inflammation_II	A6NC86	OID30651	NPC1	0.1822	0.00566274	0.0245844	Significant	-0.661427	-0.62275	NPX ~ NPC1 * Age_c + Sex + Error(SampleID)	39	0.41
RNASE1	ENSG00000129538	Inflammation_II	P07998	OID30672	Age_c	0.245439	0.00098981	0.0246247	Significant	0.0484058	0.0203411	NPX ~ NPC1 * Age_c + Sex + Error(SampleID)		0.04
EPS8L2	ENSG00000177106	Oncology	Q9H6S3	OID21397	NPC1	0.179431	0.00568275	0.0246338	Significant	-0.450066	-0.430916	NPX ~ NPC1 * Age_c + Sex + Error(SampleID)	38	0.20
WAS	ENSG00000015285	Inflammation	P42768	OID20479	NPC1	0.193675	0.00570069	0.024637	Significant	-1.88496	-1.68914	NPX ~ NPC1 * Age_c + Sex + Error(SampleID)	36	2.45
IL15RA	ENSG00000134470	Inflammation	Q13261	OID20498	NPC1	0.193685	0.00569978	0.024637	Significant	0.748413	0.664307	NPX ~ NPC1 * Age_c + Sex + Error(SampleID)	36	0.38
EEF1D	ENSG00000104529	Cardiometabolic_II	P29692	OID30335	NPC1	0.20354	0.00576776	0.0248892	Significant	-2.3327	-1.81544	NPX ~ NPC1 * Age_c + Sex + Error(SampleID)	38	3.34
GFOD2	ENSG00000141098	Oncology	Q3B7J2	OID21216	NPC1	0.192983	0.00579468	0.024929	Significant	0.860341	1.15188	NPX ~ NPC1 * Age_c + Sex + Error(SampleID)	36	1.31
AGXT	ENSG00000172482	Cardiometabolic	P21549	OID20139	NPC1	0.181156	0.00580312	0.024929	Significant	0.937032	1.02082	NPX ~ NPC1 * Age_c + Sex + Error(SampleID)	39	1.11
UNC5D	ENSG00000156687	Inflammation_II	Q6UXZ4	OID30447	NPC1	0.176577	0.00579242	0.024929	Significant	0.31175	0.627143	NPX ~ NPC1 * Age_c + Sex + Error(SampleID)	39	0.42
PROS1	ENSG00000184500	Inflammation_II	P07225	OID30737	NPC1	0.179872	0.00584039	0.0250515	Significant	-0.413643	-0.447113	NPX ~ NPC1 * Age_c + Sex + Error(SampleID)	39	0.21
OPHN1	ENSG00000079482	Neurology_II	O60890	OID31087	NPC1	0.182279	0.00592912	0.0253176	Significant	-1.78503	-1.45936	NPX ~ NPC1 * Age_c + Sex + Error(SampleID)	39	2.29
PYY	ENSG00000131096	Cardiometabolic_II	P10082	OID30150	NPC1	0.179604	0.00593315	0.0253176	Significant	1.02152	1.25399	NPX ~ NPC1 * Age_c + Sex + Error(SampleID)	39	1.69
MYOC	ENSG00000034971	Neurology	Q99972	OID21121	NPC1	0.177864	0.00593782	0.0253176	Significant	-0.466278	-0.662364	NPX ~ NPC1 * Age_c + Sex + Error(SampleID)	39	0.47
PRSS27	ENSG00000172382	Cardiometabolic	Q9BQR3	OID20212	NPC1	0.179834	0.00591854	0.0253176	Significant	-0.445033	-0.451166	NPX ~ NPC1 * Age_c + Sex + Error(SampleID)	39	0.22
MAPK13	ENSG00000156711	Oncology_II	O15264	OID31205	NPC1	0.180374	0.00601703	0.0256171	Significant	-0.943992	-0.949592	NPX ~ NPC1 * Age_c + Sex + Error(SampleID)	39	0.97
CES2	ENSG00000172831	Oncology	O00748	OID21366	NPC1	0.186716	0.00612408	0.0260342	Significant	0.570688	0.599284	NPX ~ NPC1 * Age_c + Sex + Error(SampleID)	37	0.37
CALCOCO1	ENSG00000012822	Oncology	Q9P1Z2	OID21387	NPC1	0.17105	0.00615481	0.026126	Significant	-2.0691	-1.79022	NPX ~ NPC1 * Age_c + Sex + Error(SampleID)	38	3.51
TNFRSF8	ENSG00000120949	Neurology	P28908	OID21049	NPC1	0.174323	0.00621505	0.0263036	Significant	0.370352	0.643375	NPX ~ NPC1 * Age_c + Sex + Error(SampleID)	39	0.45
GPC1	ENSG00000063660	Oncology	P35052	OID21438	NPC1	0.170747	0.0062132	0.0263036	Significant	-0.455756	-0.357521	NPX ~ NPC1 * Age_c + Sex + Error(SampleID)	38	0.14
NMNAT1	ENSG00000173614	Neurology	Q9HAN9	OID20913	NPC1	0.169708	0.00627143	0.026503	Significant	-1.64102	-1.45831	NPX ~ NPC1 * Age_c + Sex + Error(SampleID)	38	2.34
STK4	ENSG00000101109	Cardiometabolic	Q13043	OID20140	NPC1	0.181092	0.00630437	0.0265216	Significant	-1.10951	-0.833377	NPX ~ NPC1 * Age_c + Sex + Error(SampleID)	39	0.76
WFIKKN2	ENSG00000173714	Inflammation	Q8TEU8	OID20785	NPC1	0.174108	0.00631291	0.0265216	Significant	0.341974	0.569991	NPX ~ NPC1 * Age_c + Sex + Error(SampleID)	39	0.35
LAG3	ENSG00000089692	Oncology	P18627	OID21315	NPC1	0.185378	0.00630473	0.0265216	Significant	0.547339	0.463148	NPX ~ NPC1 * Age_c + Sex + Error(SampleID)	37	0.22
BSG	ENSG00000172270	Inflammation	P35613	OID20626	NPC1	0.185204	0.0062918	0.0265216	Significant	0.203014	0.286916	NPX ~ NPC1 * Age_c + Sex + Error(SampleID)	37	0.09
RRM2	ENSG00000171848	Oncology	P31350	OID21187	NPC1	0.189076	0.00635988	0.0266407	Significant	0.77092	0.828768	NPX ~ NPC1 * Age_c + Sex + Error(SampleID)	36	0.70
LGALS3	ENSG00000131981	Cardiometabolic	P17931	OID20284	NPC1	0.176287	0.006359	0.0266407	Significant	0.521375	0.522108	NPX ~ NPC1 * Age_c + Sex + Error(SampleID)	39	0.30
HMOX2	ENSG00000103415	Neurology	P30519	OID20887	NPC1	0.196441	0.00639789	0.0267608	Significant	-0.982016	-0.821755	NPX ~ NPC1 * Age_c + Sex + Error(SampleID)	35	0.63
HTRA2	ENSG00000115317	Oncology	O43464	OID21471	NPC1	0.175376	0.00654129	0.0273206	Significant	0.292404	0.392562	NPX ~ NPC1 * Age_c + Sex + Error(SampleID)	39	0.17
CA12	ENSG00000074410	Oncology	O43570	OID21344	Age_c	0.252169	0.0011244	0.027495	Significant	-0.0983282	0.0424035	NPX ~ NPC1 * Age_c + Sex + Error(SampleID)		0.17
ITGB2	ENSG00000160255	Cardiometabolic	P05107	OID20315	Age_c	0.241002	0.00111829	0.027495	Significant	0.225343	-0.0376934	NPX ~ NPC1 * Age_c + Sex + Error(SampleID)		0.13
PTPRR	ENSG00000153233	Neurology_II	Q15256	OID31099	Sex	0.317514	0.000125058	0.0275224	Significant	0.628973	-0.4277	NPX ~ NPC1 * Age_c + Sex + Error(SampleID)		0.42
CCL24	ENSG00000106178	Inflammation	O00175	OID20772	NPC1	0.173994	0.00661809	0.0276011	Significant	0.652327	0.825204	NPX ~ NPC1 * Age_c + Sex + Error(SampleID)	39	0.75
TBCB	ENSG00000105254	Neurology	Q99426	OID20993	NPC1	0.167239	0.00665863	0.0276492	Significant	-2.50552	-2.13268	NPX ~ NPC1 * Age_c + Sex + Error(SampleID)	38	5.08
GRHPR	ENSG00000137106	Cardiometabolic_II	Q9UBQ7	OID30289	NPC1	0.181678	0.0066395	0.0276492	Significant	0.788503	0.891676	NPX ~ NPC1 * Age_c + Sex + Error(SampleID)	38	0.84
CHCHD10	ENSG00000250479	Neurology_II	Q8WYQ3	OID31116	NPC1	0.176722	0.00665784	0.0276492	Significant	0.516357	0.488671	NPX ~ NPC1 * Age_c + Sex + Error(SampleID)	39	0.26
CHMP6	ENSG00000176108	Cardiometabolic_II	Q96FZ7	OID30327	NPC1	0.193206	0.00671259	0.0278329	Significant	-0.663045	-0.572391	NPX ~ NPC1 * Age_c + Sex + Error(SampleID)	38	0.35
CDH17	ENSG00000079112	Cardiometabolic	Q12864	OID20134	Age_c	0.239974	0.0011503	0.02789	Significant	-0.275193	-0.0783443	NPX ~ NPC1 * Age_c + Sex + Error(SampleID)		0.57
RNASEH2A	ENSG00000104889	Neurology_II	O75792	OID31027	NPC1	0.177072	0.00685012	0.0283621	Significant	-1.21737	-0.985376	NPX ~ NPC1 * Age_c + Sex + Error(SampleID)	39	1.08
KLK10	ENSG00000129451	Oncology	O43240	OID21523	NPC1	0.171406	0.00687185	0.0284109	Significant	0.271203	0.328299	NPX ~ NPC1 * Age_c + Sex + Error(SampleID)	39	0.12
SCP2	ENSG00000116171	Oncology	P22307	OID21161	NPC1	0.185003	0.00700405	0.028874	Significant	0.862556	1.03341	NPX ~ NPC1 * Age_c + Sex + Error(SampleID)	36	1.11
LEPR	ENSG00000116678	Cardiometabolic	P48357	OID20128	NPC1	0.168246	0.00700064	0.028874	Significant	0.244946	0.494666	NPX ~ NPC1 * Age_c + Sex + Error(SampleID)	39	0.27
PPP1CC	ENSG00000186298	Oncology_II	P36873	OID31360	NPC1	0.176148	0.00705151	0.0289862	Significant	-1.45059	-1.07777	NPX ~ NPC1 * Age_c + Sex + Error(SampleID)	39	1.31
CPQ	ENSG00000104324	Cardiometabolic_II	Q9Y646	OID30406	NPC1	0.173612	0.00704573	0.0289862	Significant	-0.410236	-0.367839	NPX ~ NPC1 * Age_c + Sex + Error(SampleID)	39	0.15
AGRN	ENSG00000188157	Inflammation	O00468	OID20786	NPC1	0.17363	0.00707856	0.0290556	Significant	0.389765	0.372327	NPX ~ NPC1 * Age_c + Sex + Error(SampleID)	39	0.16
GAMT	ENSG00000130005	Cardiometabolic_II	Q14353	OID30133	NPC1	0.175261	0.00709873	0.0290967	Significant	-0.957984	-0.775759	NPX ~ NPC1 * Age_c + Sex + Error(SampleID)	39	0.68
MYH9	ENSG00000100345	Cardiometabolic_II	P35579	OID30382	NPC1	0.174653	0.00713635	0.029209	Significant	-1.41471	-1.22255	NPX ~ NPC1 * Age_c + Sex + Error(SampleID)	39	1.69
PKD1	ENSG00000008710	Cardiometabolic_II	P98161	OID30328	NPC1	0.173212	0.00715481	0.0292427	Significant	0.28538	0.356178	NPX ~ NPC1 * Age_c + Sex + Error(SampleID)	38	0.14
NT5C3A	ENSG00000122643	Inflammation	Q9H0P0	OID20553	NPC1	0.151999	0.00719417	0.0293198	Significant	-2.21062	-2.08381	NPX ~ NPC1 * Age_c + Sex + Error(SampleID)	37	5.14
CYTL1	ENSG00000170891	Cardiometabolic_II	Q9NRR1	OID30374	NPC1	0.167916	0.00718563	0.0293198	Significant	0.125316	0.423651	NPX ~ NPC1 * Age_c + Sex + Error(SampleID)	39	0.20
ZP4	ENSG00000116996	Oncology_II	Q12836	OID31185	NPC1	0.171519	0.00729027	0.0296692	Significant	1.85897	1.47314	NPX ~ NPC1 * Age_c + Sex + Error(SampleID)	39	2.46
CD84	ENSG00000066294	Inflammation	Q9UIB8	OID20607	NPC1	0.150048	0.00730548	0.0296889	Significant	-0.401944	-0.367324	NPX ~ NPC1 * Age_c + Sex + Error(SampleID)	37	0.16
VAMP8	ENSG00000118640	Inflammation_II	Q9BV40	OID30555	NPC1	0.17409	0.00732295	0.0296949	Significant	-2.14192	-1.68347	NPX ~ NPC1 * Age_c + Sex + Error(SampleID)	39	3.22
AXIN1	ENSG00000103126	Inflammation	O15169	OID20582	NPC1	0.144305	0.00732771	0.0296949	Significant	-1.49393	-1.34638	NPX ~ NPC1 * Age_c + Sex + Error(SampleID)	37	2.16
ITPA	ENSG00000125877	Cardiometabolic_II	Q9BY32	OID30082	NPC1	0.169705	0.00735777	0.0297745	Significant	1.15325	1.27123	NPX ~ NPC1 * Age_c + Sex + Error(SampleID)	39	1.84
NME3	ENSG00000103024	Inflammation	Q13232	OID20789	NPC1	0.173738	0.00742504	0.0300043	Significant	-0.248513	-0.195314	NPX ~ NPC1 * Age_c + Sex + Error(SampleID)	39	0.04
MYBPC2	ENSG00000086967	Cardiometabolic_II	Q14324	OID30199	Age_c	0.241951	0.0012657	0.0301764	Significant	0.137295	0.13044	NPX ~ NPC1 * Age_c + Sex + Error(SampleID)		1.52
CCDC80	ENSG00000091986	Cardiometabolic	Q76M96	OID20226	Age_c	0.236672	0.00125914	0.0301764	Significant	0.157342	0.0386571	NPX ~ NPC1 * Age_c + Sex + Error(SampleID)		0.14
CPM	ENSG00000135678	Neurology	P14384	OID21054	NPC1	0.17306	0.00749518	0.030245	Significant	0.407274	0.355136	NPX ~ NPC1 * Age_c + Sex + Error(SampleID)	39	0.14
ERMAP	ENSG00000164010	Inflammation_II	Q96PL5	OID30539	NPC1	0.172876	0.00752141	0.0303081	Significant	-1.00601	-0.825566	NPX ~ NPC1 * Age_c + Sex + Error(SampleID)	39	0.78
BLOC1S2	ENSG00000196072	Neurology_II	Q6QNY1	OID30856	NPC1	0.179436	0.00756791	0.0304098	Significant	2.70172	2.56819	NPX ~ NPC1 * Age_c + Sex + Error(SampleID)	38	7.40
SEZ6	ENSG00000063015	Neurology_II	Q53EL9	OID30968	NPC1	0.193696	0.00756261	0.0304098	Significant	0.440642	0.765958	NPX ~ NPC1 * Age_c + Sex + Error(SampleID)	35	0.59
GNPDA1	ENSG00000113552	Cardiometabolic_II	P46926	OID30197	NPC1	0.17321	0.00765492	0.0307163	Significant	0.713298	0.755723	NPX ~ NPC1 * Age_c + Sex + Error(SampleID)	38	0.63
TALDO1	ENSG00000177156	Cardiometabolic_II	P37837	OID30414	NPC1	0.167633	0.00767271	0.0307446	Significant	0.533794	0.693932	NPX ~ NPC1 * Age_c + Sex + Error(SampleID)	39	0.55
TPD52L2	ENSG00000101150	Inflammation_II	O43399	OID30609	NPC1	0.172527	0.00771019	0.0308515	Significant	-1.76439	-1.42891	NPX ~ NPC1 * Age_c + Sex + Error(SampleID)	39	2.35
CXADR	ENSG00000154639	Inflammation	P78310	OID20561	NPC1	0.167786	0.00775344	0.0309813	Significant	0.642075	0.724975	NPX ~ NPC1 * Age_c + Sex + Error(SampleID)	37	0.64
CHAD	ENSG00000136457	Inflammation_II	O15335	OID30660	Age_c	0.235044	0.00131636	0.0311249	Significant	-0.338256	-0.0608005	NPX ~ NPC1 * Age_c + Sex + Error(SampleID)		0.36
PPP1R12A	ENSG00000058272	Oncology	O14974	OID21475	NPC1	0.17214	0.0078028	0.031135	Significant	-1.77091	-1.42138	NPX ~ NPC1 * Age_c + Sex + Error(SampleID)	39	2.34
FGR	ENSG00000000938	Neurology	P09769	OID20828	NPC1	0.187611	0.00784107	0.0312441	Significant	-1.63473	-1.5111	NPX ~ NPC1 * Age_c + Sex + Error(SampleID)	35	2.25
NAA10	ENSG00000102030	Cardiometabolic_II	P41227	OID30188	NPC1	0.171159	0.00793799	0.0315864	Significant	-2.22946	-1.8166	NPX ~ NPC1 * Age_c + Sex + Error(SampleID)	39	3.84
EPHB6	ENSG00000106123	Neurology	O15197	OID20982	NPC1	0.17424	0.00795204	0.0315983	Significant	0.330188	0.397721	NPX ~ NPC1 * Age_c + Sex + Error(SampleID)	38	0.19
RAB37	ENSG00000172794	Inflammation	Q96AX2	OID20425	NPC1	0.179707	0.0080046	0.0317048	Significant	-1.65947	-1.5615	NPX ~ NPC1 * Age_c + Sex + Error(SampleID)	36	2.29
HEPACAM2	ENSG00000188175	Neurology_II	A8MVW5	OID31151	NPC1	0.167321	0.00801208	0.0317048	Significant	0.568462	0.592744	NPX ~ NPC1 * Age_c + Sex + Error(SampleID)	39	0.41
TFPI	ENSG00000003436	Cardiometabolic	P10646	OID20388	NPC1	0.167442	0.00800393	0.0317048	Significant	0.351328	0.400089	NPX ~ NPC1 * Age_c + Sex + Error(SampleID)	39	0.19
LGALS7_LGALS7B		Oncology	P47929	OID21406	NPC1	0.167862	0.00805341	0.0317804	Significant	-0.456364	-0.542922	NPX ~ NPC1 * Age_c + Sex + Error(SampleID)	38	0.35
ITGAM	ENSG00000169896	Neurology	P11215	OID21071	NPC1	0.17232	0.00805301	0.0317804	Significant	-0.558353	-0.388449	NPX ~ NPC1 * Age_c + Sex + Error(SampleID)	39	0.18
CIAPIN1	ENSG00000005194	Oncology	Q6FI81	OID21501	NPC1	0.170157	0.00808092	0.0318012	Significant	-1.96011	-1.64058	NPX ~ NPC1 * Age_c + Sex + Error(SampleID)	39	3.14
HK2	ENSG00000159399	Cardiometabolic	P52789	OID20065	NPC1	0.171975	0.00807738	0.0318012	Significant	-0.921783	-0.858167	NPX ~ NPC1 * Age_c + Sex + Error(SampleID)	32	0.75
DOCK9	ENSG00000088387	Neurology_II	Q9BZ29	OID30836	NPC1	0.173958	0.00821692	0.032292	Significant	1.58393	1.72771	NPX ~ NPC1 * Age_c + Sex + Error(SampleID)	38	3.42
ASPN	ENSG00000106819	Cardiometabolic_II	Q9BXN1	OID30315	Age_c	0.23877	0.00137821	0.0323201	Significant	0.297761	-0.0389023	NPX ~ NPC1 * Age_c + Sex + Error(SampleID)		0.15
IGSF21	ENSG00000117154	Cardiometabolic_II	Q96ID5	OID30210	NPC1	0.169669	0.00823588	0.0323221	Significant	0.366678	0.485048	NPX ~ NPC1 * Age_c + Sex + Error(SampleID)	38	0.26
GP5	ENSG00000178732	Inflammation_II	P40197	OID30611	NPC1	0.168294	0.00842619	0.0330237	Significant	-0.399534	-0.33776	NPX ~ NPC1 * Age_c + Sex + Error(SampleID)	39	0.13
RNF149	ENSG00000163162	Cardiometabolic_II	Q8NC42	OID30235	NPC1	0.168947	0.00851809	0.0333382	Significant	0.520911	0.516066	NPX ~ NPC1 * Age_c + Sex + Error(SampleID)	38	0.30
TRIM58	ENSG00000162722	Oncology_II	Q8NG06	OID31429	NPC1	0.165101	0.00853459	0.0333418	Significant	1.32079	1.2403	NPX ~ NPC1 * Age_c + Sex + Error(SampleID)	39	1.82
CCN1	ENSG00000142871	Oncology	O00622	OID21368	NPC1	0.172266	0.0085423	0.0333418	Significant	0.549252	0.511729	NPX ~ NPC1 * Age_c + Sex + Error(SampleID)	37	0.30
SPINK1	ENSG00000164266	Neurology	P00995	OID21097	Age_c	0.231652	0.0014438	0.033583	Significant	0.184062	-0.0411279	NPX ~ NPC1 * Age_c + Sex + Error(SampleID)		0.17
GIGYF2	ENSG00000204120	Neurology_II	Q6Y7W6	OID31062	NPC1	0.168446	0.00867556	0.0338158	Significant	-1.75953	-1.36749	NPX ~ NPC1 * Age_c + Sex + Error(SampleID)	39	2.23
TDRKH	ENSG00000182134	Neurology	Q9Y2W6	OID20875	NPC1	0.182119	0.00871433	0.0339207	Significant	-0.963293	-0.936385	NPX ~ NPC1 * Age_c + Sex + Error(SampleID)	35	0.89
NAAA	ENSG00000138744	Neurology	Q02083	OID20931	NPC1	0.162486	0.0087506	0.0340156	Significant	0.577551	0.642346	NPX ~ NPC1 * Age_c + Sex + Error(SampleID)	38	0.50
FUCA1	ENSG00000179163	Cardiometabolic	P04066	OID20261	NPC1	0.167516	0.00877039	0.0340462	Significant	0.639983	0.615006	NPX ~ NPC1 * Age_c + Sex + Error(SampleID)	39	0.45
TXNL1	ENSG00000091164	Neurology_II	O43396	OID30872	NPC1	0.170151	0.00881325	0.0341663	Significant	-1.22373	-1.31802	NPX ~ NPC1 * Age_c + Sex + Error(SampleID)	38	2.03
CD55	ENSG00000196352	Cardiometabolic	P08174	OID20377	Age_c	0.230705	0.00148148	0.0341815	Significant	0.0119442	0.0232739	NPX ~ NPC1 * Age_c + Sex + Error(SampleID)		0.05
KCNIP4	ENSG00000185774	Neurology	Q6PIL6	OID20813	Age_c	0.252141	0.00154161	0.0342284	Significant	0.660289	-0.133858	NPX ~ NPC1 * Age_c + Sex + Error(SampleID)		1.54
CKB	ENSG00000166165	Cardiometabolic_II	P12277	OID30400	Age_c	0.22955	0.00152867	0.0342284	Significant	0.4799	-0.063018	NPX ~ NPC1 * Age_c + Sex + Error(SampleID)		0.39
F9	ENSG00000101981	Cardiometabolic	P00740	OID20349	Age_c	0.229199	0.00154333	0.0342284	Significant	1.2578	0.0484014	NPX ~ NPC1 * Age_c + Sex + Error(SampleID)		0.23
TNFRSF4	ENSG00000186827	Inflammation	P43489	OID20653	Age_c	0.240265	0.00153696	0.0342284	Significant	0.490398	-0.040566	NPX ~ NPC1 * Age_c + Sex + Error(SampleID)		0.14
BSG	ENSG00000172270	Inflammation	P35613	OID20626	Age_c	0.240852	0.00151361	0.0342284	Significant	0.203014	-0.0326975	NPX ~ NPC1 * Age_c + Sex + Error(SampleID)		0.09
BCR	ENSG00000186716	Inflammation	P11274	OID20558	NPC1	0.134726	0.00884285	0.0342346	Significant	-0.822039	-0.774416	NPX ~ NPC1 * Age_c + Sex + Error(SampleID)	37	0.75
PRRT3	ENSG00000163704	Cardiometabolic_II	Q5FWE3	OID30276	Age_c	0.234221	0.00155596	0.0342431	Significant	-0.224427	-0.11858	NPX ~ NPC1 * Age_c + Sex + Error(SampleID)		1.31
TSC1	ENSG00000165699	Inflammation_II	Q92574	OID30478	NPC1	0.166258	0.00895173	0.0344655	Significant	-1.5852	-1.31842	NPX ~ NPC1 * Age_c + Sex + Error(SampleID)	39	2.09
FOXJ3	ENSG00000198815	Inflammation_II	Q9UPW0	OID30445	NPC1	0.166904	0.00896189	0.0344655	Significant	-1.30365	-1.04768	NPX ~ NPC1 * Age_c + Sex + Error(SampleID)	39	1.32
SNAPIN	ENSG00000143553	Neurology_II	O95295	OID31019	NPC1	0.166787	0.00897477	0.0344655	Significant	-0.970885	-0.763861	NPX ~ NPC1 * Age_c + Sex + Error(SampleID)	39	0.70
PTK7	ENSG00000112655	Neurology	Q13308	OID20880	NPC1	0.178938	0.00896781	0.0344655	Significant	0.337817	0.475309	NPX ~ NPC1 * Age_c + Sex + Error(SampleID)	35	0.23
FLT3	ENSG00000122025	Oncology	P36888	OID21272	NPC1	0.175109	0.00894989	0.0344655	Significant	0.239858	0.327383	NPX ~ NPC1 * Age_c + Sex + Error(SampleID)	36	0.12
EGFR	ENSG00000146648	Cardiometabolic	P00533	OID20319	NPC1	0.165352	0.00895564	0.0344655	Significant	-0.2217	-0.176296	NPX ~ NPC1 * Age_c + Sex + Error(SampleID)	39	0.04
DKK3	ENSG00000050165	Cardiometabolic	Q9UBP4	OID20264	NPC1	0.163192	0.00899703	0.0345047	Significant	0.427875	0.388416	NPX ~ NPC1 * Age_c + Sex + Error(SampleID)	39	0.18
BCHE	ENSG00000114200	Inflammation_II	P06276	OID30717	NPC1	0.16465	0.00901481	0.0345266	Significant	-0.304741	-0.241317	NPX ~ NPC1 * Age_c + Sex + Error(SampleID)	39	0.07
PRG2	ENSG00000186652	Cardiometabolic_II	P13727	OID30381	NPC1	0.162166	0.00910347	0.0348196	Significant	0.57877	0.597239	NPX ~ NPC1 * Age_c + Sex + Error(SampleID)	39	0.43
COX6B1	ENSG00000126267	Cardiometabolic_II	P14854	OID30317	NPC1	0.17557	0.00916011	0.0349894	Significant	-1.55742	-1.43582	NPX ~ NPC1 * Age_c + Sex + Error(SampleID)	38	2.37
MYO9B	ENSG00000099331	Inflammation	Q13459	OID20451	NPC1	0.173806	0.00923227	0.0351711	Significant	-1.66578	-1.33094	NPX ~ NPC1 * Age_c + Sex + Error(SampleID)	36	1.73
SUSD4	ENSG00000143502	Oncology_II	Q5VX71	OID31398	NPC1	0.161571	0.00922608	0.0351711	Significant	0.501463	0.583904	NPX ~ NPC1 * Age_c + Sex + Error(SampleID)	39	0.41
CEP152	ENSG00000103995	Oncology_II	O94986	OID31249	NPC1	0.16473	0.00924638	0.0351781	Significant	-1.44405	-1.19845	NPX ~ NPC1 * Age_c + Sex + Error(SampleID)	39	1.74
GGA1	ENSG00000100083	Neurology	Q9UJY5	OID20838	NPC1	0.181234	0.00929166	0.0353034	Significant	-1.08717	-0.893392	NPX ~ NPC1 * Age_c + Sex + Error(SampleID)	35	0.83
PODXL2	ENSG00000114631	Oncology	Q9NZ53	OID21487	Age_c	0.227389	0.00162091	0.0354002	Significant	-0.0555258	-0.0378559	NPX ~ NPC1 * Age_c + Sex + Error(SampleID)		0.14
SLC28A1	ENSG00000156222	Oncology_II	O00337	OID31220	NPC1	0.161453	0.00938451	0.0356089	Significant	0.846132	1.05559	NPX ~ NPC1 * Age_c + Sex + Error(SampleID)	39	1.36
CHGB	ENSG00000089199	Neurology	P05060	OID21038	Age_c	0.226471	0.00166173	0.0357459	Significant	0.467672	-0.0685332	NPX ~ NPC1 * Age_c + Sex + Error(SampleID)		0.47
NPTXR	ENSG00000221890	Cardiometabolic	O95502	OID20191	Age_c	0.226475	0.00166153	0.0357459	Significant	0.000435833	-0.06531	NPX ~ NPC1 * Age_c + Sex + Error(SampleID)		0.43
PADI4	ENSG00000159339	Neurology	Q9UM07	OID20832	NPC1	0.179431	0.00950428	0.0360155	Significant	-1.804	-1.69552	NPX ~ NPC1 * Age_c + Sex + Error(SampleID)	35	2.99
MTIF3	ENSG00000122033	Oncology_II	Q9H2K0	OID31513	NPC1	0.163076	0.00955182	0.036146	Significant	-1.13009	-1.01382	NPX ~ NPC1 * Age_c + Sex + Error(SampleID)	39	1.26
BRSK2	ENSG00000174672	Neurology_II	Q8IWQ3	OID31042	NPC1	0.164509	0.00956398	0.036146	Significant	-1.22986	-0.98909	NPX ~ NPC1 * Age_c + Sex + Error(SampleID)	39	1.20
SV2A	ENSG00000159164	Neurology_II	Q7L0J3	OID30965	Age_c	0.248336	0.00169554	0.0362011	Significant	-2.66175	-0.175906	NPX ~ NPC1 * Age_c + Sex + Error(SampleID)		2.82
LAYN	ENSG00000204381	Neurology	Q6UX15	OID20970	NPC1	0.169837	0.0096169	0.0362981	Significant	0.300056	0.372408	NPX ~ NPC1 * Age_c + Sex + Error(SampleID)	38	0.17
SERPINA12	ENSG00000165953	Cardiometabolic	Q8IW75	OID20219	Age_c	0.224811	0.00173802	0.0365624	Significant	0.892499	0.0562496	NPX ~ NPC1 * Age_c + Sex + Error(SampleID)		0.32
PRTG	ENSG00000166450	Oncology	Q2VWP7	OID21443	Age_c	0.230241	0.0017294	0.0365624	Significant	-0.0883517	-0.0301641	NPX ~ NPC1 * Age_c + Sex + Error(SampleID)		0.09
USP8	ENSG00000138592	Cardiometabolic	P40818	OID20110	NPC1	0.163831	0.00970193	0.0365708	Significant	-1.35728	-1.26785	NPX ~ NPC1 * Age_c + Sex + Error(SampleID)	32	1.72
GYS1	ENSG00000104812	Cardiometabolic	P13807	OID20097	NPC1	0.160592	0.00980823	0.0369228	Significant	-1.94848	-1.69976	NPX ~ NPC1 * Age_c + Sex + Error(SampleID)	32	3.10
LTB	ENSG00000227507	Oncology_II	Q06643	OID31383	NPC1	0.157994	0.00986894	0.0371026	Significant	0.367761	0.526049	NPX ~ NPC1 * Age_c + Sex + Error(SampleID)	39	0.34
SSC5D	ENSG00000179954	Cardiometabolic	A1L4H1	OID20351	Age_c	0.223921	0.00178033	0.0371789	Significant	0.368684	0.0414639	NPX ~ NPC1 * Age_c + Sex + Error(SampleID)		0.18
AFAP1	ENSG00000196526	Inflammation_II	Q8N556	OID30569	NPC1	0.16121	0.00992088	0.0372278	Significant	-1.58748	-1.41392	NPX ~ NPC1 * Age_c + Sex + Error(SampleID)	39	2.48
LCN2	ENSG00000148346	Cardiometabolic	P80188	OID20392	NPC1	0.16144	0.00994129	0.0372278	Significant	-0.720995	-0.739376	NPX ~ NPC1 * Age_c + Sex + Error(SampleID)	39	0.68
GALNT7	ENSG00000109586	Oncology	Q86SF2	OID21377	NPC1	0.166798	0.00993365	0.0372278	Significant	0.181822	0.238538	NPX ~ NPC1 * Age_c + Sex + Error(SampleID)	37	0.07
TLR3	ENSG00000164342	Inflammation	O15455	OID20612	NPC1	0.166301	0.0100193	0.0374707	Significant	0.415166	0.511272	NPX ~ NPC1 * Age_c + Sex + Error(SampleID)	37	0.32
NPM1	ENSG00000181163	Neurology	P06748	OID20961	NPC1	0.156469	0.0101144	0.037777	Significant	-0.985459	-1.0649	NPX ~ NPC1 * Age_c + Sex + Error(SampleID)	38	1.42
VWA5A	ENSG00000110002	Oncology_II	O00534	OID31198	NPC1	0.157021	0.010198	0.0380349	Significant	1.49754	1.84419	NPX ~ NPC1 * Age_c + Sex + Error(SampleID)	39	4.25
CTSF	ENSG00000174080	Oncology	Q9UBX1	OID21500	NPC1	0.159651	0.01021	0.0380349	Significant	0.457426	0.411617	NPX ~ NPC1 * Age_c + Sex + Error(SampleID)	39	0.21
DDC	ENSG00000132437	Cardiometabolic	P20711	OID20215	Age_c	0.222539	0.00184798	0.0383121	Significant	-0.166455	-0.0526868	NPX ~ NPC1 * Age_c + Sex + Error(SampleID)		0.29
TSPAN8	ENSG00000127324	Oncology_II	P19075	OID31470	NPC1	0.15824	0.0103369	0.0384078	Significant	1.18506	1.21805	NPX ~ NPC1 * Age_c + Sex + Error(SampleID)	39	1.86
DSG4	ENSG00000175065	Oncology	Q86SJ6	OID21325	NPC1	0.165313	0.0103355	0.0384078	Significant	-0.65612	-0.642691	NPX ~ NPC1 * Age_c + Sex + Error(SampleID)	37	0.49
SRPK2	ENSG00000135250	Inflammation	P78362	OID20502	NPC1	0.127404	0.0104244	0.0386825	Significant	-1.00569	-0.89587	NPX ~ NPC1 * Age_c + Sex + Error(SampleID)	37	1.06
RHOC	ENSG00000155366	Neurology	P08134	OID20950	NPC1	0.151164	0.0104613	0.0387692	Significant	-0.917327	-0.833323	NPX ~ NPC1 * Age_c + Sex + Error(SampleID)	38	0.88
PRDX6	ENSG00000117592	Oncology	P30041	OID21404	NPC1	0.156426	0.010513	0.0389104	Significant	0.762783	0.749735	NPX ~ NPC1 * Age_c + Sex + Error(SampleID)	38	0.71
XG	ENSG00000124343	Cardiometabolic	P55808	OID20259	NPC1	0.15673	0.010582	0.039115	Significant	-0.100012	-0.304821	NPX ~ NPC1 * Age_c + Sex + Error(SampleID)	39	0.12
PTS	ENSG00000150787	Neurology	Q03393	OID20847	NPC1	0.172638	0.0106388	0.0392742	Significant	0.826506	0.870766	NPX ~ NPC1 * Age_c + Sex + Error(SampleID)	35	0.82
CETN3	ENSG00000153140	Oncology_II	O15182	OID31525	NPC1	0.159914	0.0106742	0.0393542	Significant	-1.13813	-0.875792	NPX ~ NPC1 * Age_c + Sex + Error(SampleID)	39	0.97
IGSF8	ENSG00000162729	Cardiometabolic	Q969P0	OID20167	Age_c	0.22104	0.00192412	0.0396037	Significant	0.0769608	-0.0325482	NPX ~ NPC1 * Age_c + Sex + Error(SampleID)		0.11
LEP	ENSG00000174697	Cardiometabolic	P41159	OID20187	NPC1	0.151514	0.0108164	0.0397936	Significant	-0.259158	-1.13647	NPX ~ NPC1 * Age_c + Sex + Error(SampleID)	39	1.64
LRRC37A2	ENSG00000238083	Oncology_II	A6NM11	OID31440	NPC1	0.154382	0.0108212	0.0397936	Significant	0.287458	0.433308	NPX ~ NPC1 * Age_c + Sex + Error(SampleID)	39	0.24
CCN2	ENSG00000118523	Inflammation	P29279	OID20709	NPC1	0.154875	0.0109226	0.0401149	Significant	-0.442251	-0.533858	NPX ~ NPC1 * Age_c + Sex + Error(SampleID)	39	0.36
CDKN1A	ENSG00000124762	Oncology	P38936	OID21319	NPC1	0.162929	0.011008	0.0403769	Significant	-0.926869	-0.938995	NPX ~ NPC1 * Age_c + Sex + Error(SampleID)	37	1.07
PENK	ENSG00000181195	Inflammation_II	P01210	OID30666	NPC1	0.152919	0.011034	0.0404203	Significant	0.334148	0.51115	NPX ~ NPC1 * Age_c + Sex + Error(SampleID)	39	0.33
CD40	ENSG00000101017	Inflammation	P25942	OID20724	Age_c	0.219717	0.00199388	0.0407465	Significant	-0.334319	-0.046338	NPX ~ NPC1 * Age_c + Sex + Error(SampleID)		0.23
FCAR	ENSG00000186431	Inflammation	P24071	OID20564	NPC1	0.176111	0.0111848	0.0409202	Significant	0.649649	0.810165	NPX ~ NPC1 * Age_c + Sex + Error(SampleID)	37	0.88
COL9A2	ENSG00000049089	Oncology_II	Q14055	OID31255	Age_c	0.229781	0.00201793	0.0409453	Significant	0.665222	-0.120993	NPX ~ NPC1 * Age_c + Sex + Error(SampleID)		1.43
TNFRSF13C	ENSG00000159958	Inflammation	Q96RJ3	OID20480	Age_c	0.235021	0.00203843	0.0410701	Significant	0.437959	-0.0685627	NPX ~ NPC1 * Age_c + Sex + Error(SampleID)		0.41
OPTC	ENSG00000188770	Oncology	Q9UBM4	OID21362	NPC1	0.160826	0.011285	0.0412343	Significant	0.418969	0.460063	NPX ~ NPC1 * Age_c + Sex + Error(SampleID)	37	0.26
AKT3	ENSG00000117020	Oncology	Q9Y243	OID21197	NPC1	0.16453	0.011383	0.0415394	Significant	-1.33492	-0.991482	NPX ~ NPC1 * Age_c + Sex + Error(SampleID)	36	1.18
PALM3	ENSG00000187867	Cardiometabolic_II	A6NDB9	OID30182	NPC1	0.152242	0.0114442	0.0416593	Significant	1.09179	1.38386	NPX ~ NPC1 * Age_c + Sex + Error(SampleID)	39	2.47
GABARAP	ENSG00000170296	Oncology_II	O95166	OID31414	NPC1	0.153719	0.011445	0.0416593	Significant	0.862596	0.894843	NPX ~ NPC1 * Age_c + Sex + Error(SampleID)	39	1.03
PRTFDC1	ENSG00000099256	Neurology	Q9NRG1	OID20867	NPC1	0.170854	0.0114627	0.0416616	Significant	-1.27622	-1.33155	NPX ~ NPC1 * Age_c + Sex + Error(SampleID)	35	1.95
APOD	ENSG00000189058	Inflammation_II	P05090	OID30746	NPC1	0.15243	0.0114748	0.0416616	Significant	-0.534192	-0.662411	NPX ~ NPC1 * Age_c + Sex + Error(SampleID)	39	0.57
FCRL6	ENSG00000181036	Inflammation	Q6DN72	OID20529	NPC1	0.164375	0.0116274	0.0421622	Significant	0.693008	0.73124	NPX ~ NPC1 * Age_c + Sex + Error(SampleID)	37	0.73
ACE2	ENSG00000130234	Cardiometabolic	Q9BYF1	OID20105	NPC1	0.170452	0.011701	0.0423753	Significant	0.404742	0.416419	NPX ~ NPC1 * Age_c + Sex + Error(SampleID)	32	0.20
CD70	ENSG00000125726	Inflammation	P32970	OID20599	NPC1	0.126485	0.0117557	0.0425198	Significant	-0.438329	-0.423149	NPX ~ NPC1 * Age_c + Sex + Error(SampleID)	37	0.24
COLEC12	ENSG00000158270	Inflammation	Q5KU26	OID20738	NPC1	0.150127	0.0118012	0.0426305	Significant	0.236838	0.31397	NPX ~ NPC1 * Age_c + Sex + Error(SampleID)	39	0.13
C1QTNF9	ENSG00000240654	Inflammation_II	P0C862	OID30620	NPC1	0.151263	0.0119748	0.0432028	Significant	-0.388273	-0.471544	NPX ~ NPC1 * Age_c + Sex + Error(SampleID)	39	0.29
INSL5	ENSG00000172410	Oncology_II	Q9Y5Q6	OID31448	NPC1	0.151188	0.012109	0.0436321	Significant	0.954191	1.30504	NPX ~ NPC1 * Age_c + Sex + Error(SampleID)	39	2.24
CXCL5	ENSG00000163735	Cardiometabolic	P42830	OID20207	NPC1	0.153484	0.0122064	0.0438118	Significant	-1.24952	-1.14862	NPX ~ NPC1 * Age_c + Sex + Error(SampleID)	39	1.74
ELN	ENSG00000049540	Cardiometabolic_II	P15502	OID30301	NPC1	0.154735	0.0122007	0.0438118	Significant	0.785307	0.873612	NPX ~ NPC1 * Age_c + Sex + Error(SampleID)	38	0.95
NFYA	ENSG00000001167	Cardiometabolic_II	P23511	OID30134	NPC1	0.152916	0.0122201	0.0438118	Significant	-0.745972	-0.716229	NPX ~ NPC1 * Age_c + Sex + Error(SampleID)	39	0.68
CPA1	ENSG00000091704	Cardiometabolic	P15085	OID20280	NPC1	0.152626	0.0121984	0.0438118	Significant	0.686641	0.517696	NPX ~ NPC1 * Age_c + Sex + Error(SampleID)	39	0.35
STX1B	ENSG00000099365	Neurology_II	P61266	OID30934	Age_c	0.237934	0.00219547	0.0439248	Significant	0.459278	-0.0747451	NPX ~ NPC1 * Age_c + Sex + Error(SampleID)		0.54
MITD1	ENSG00000158411	Neurology	Q8WV92	OID20959	NPC1	0.144028	0.0123452	0.0440955	Significant	-0.93087	-0.812406	NPX ~ NPC1 * Age_c + Sex + Error(SampleID)	38	0.88
VIT	ENSG00000205221	Cardiometabolic_II	Q6UXI7	OID30334	NPC1	0.153449	0.0123609	0.0440955	Significant	-0.400564	-0.548946	NPX ~ NPC1 * Age_c + Sex + Error(SampleID)	38	0.38
ACY3	ENSG00000132744	Cardiometabolic_II	Q96HD9	OID30086	NPC1	0.149734	0.012355	0.0440955	Significant	0.318424	0.447896	NPX ~ NPC1 * Age_c + Sex + Error(SampleID)	39	0.27
ENPP2	ENSG00000136960	Cardiometabolic	Q13822	OID20288	NPC1	0.146356	0.0123167	0.0440955	Significant	0.106371	0.273213	NPX ~ NPC1 * Age_c + Sex + Error(SampleID)	39	0.10
VWC2L	ENSG00000174453	Neurology_II	B2RUY7	OID31002	NPC1	0.148203	0.012436	0.0441993	Significant	0.515686	0.83602	NPX ~ NPC1 * Age_c + Sex + Error(SampleID)	39	0.93
FABP4	ENSG00000170323	Cardiometabolic	P15090	OID20245	NPC1	0.14979	0.0124155	0.0441993	Significant	-0.311536	-0.568957	NPX ~ NPC1 * Age_c + Sex + Error(SampleID)	39	0.43
PCDH12	ENSG00000113555	Neurology_II	Q9NPG4	OID31045	NPC1	0.149282	0.0124364	0.0441993	Significant	0.267219	0.370594	NPX ~ NPC1 * Age_c + Sex + Error(SampleID)	39	0.18
GPR158	ENSG00000151025	Neurology_II	Q5T848	OID31013	Age_c	0.215104	0.00225671	0.0445273	Significant	0.267204	-0.119046	NPX ~ NPC1 * Age_c + Sex + Error(SampleID)		1.53
MYOM3	ENSG00000142661	Inflammation_II	Q5VTT5	OID30633	Age_c	0.215264	0.00224702	0.0445273	Significant	-1.1325	0.117297	NPX ~ NPC1 * Age_c + Sex + Error(SampleID)		1.48
KLRC1	ENSG00000134545	Neurology_II	P26715	OID30855	NPC1	0.149609	0.01258	0.0446544	Significant	1.25306	1.61274	NPX ~ NPC1 * Age_c + Sex + Error(SampleID)	38	3.38
FGFBP1	ENSG00000137440	Oncology	Q14512	OID21507	NPC1	0.152607	0.0127591	0.045234	Significant	-0.315699	-0.302368	NPX ~ NPC1 * Age_c + Sex + Error(SampleID)	39	0.12
FRMD4B	ENSG00000114541	Cardiometabolic_II	Q9Y2L6	OID30155	NPC1	0.152786	0.0128167	0.0453257	Significant	-1.66304	-1.28735	NPX ~ NPC1 * Age_c + Sex + Error(SampleID)	39	2.22
DRG2	ENSG00000108591	Oncology	P55039	OID21335	NPC1	0.157253	0.0128138	0.0453257	Significant	-0.871868	-0.710071	NPX ~ NPC1 * Age_c + Sex + Error(SampleID)	37	0.64
SERPINB1	ENSG00000021355	Neurology	P30740	OID21088	NPC1	0.1521	0.0128396	0.0453508	Significant	-1.66697	-1.35911	NPX ~ NPC1 * Age_c + Sex + Error(SampleID)	39	2.47
REST	ENSG00000084093	Oncology_II	Q13127	OID31248	NPC1	0.146787	0.0128921	0.04548	Significant	0.723668	1.04725	NPX ~ NPC1 * Age_c + Sex + Error(SampleID)	39	1.47
OSTN	ENSG00000188729	Neurology_II	P61366	OID30909	NPC1	0.168579	0.0130241	0.0457764	Significant	0.963543	1.38783	NPX ~ NPC1 * Age_c + Sex + Error(SampleID)	35	2.28
DNAJB14	ENSG00000164031	Oncology_II	Q8TBM8	OID31434	NPC1	0.152185	0.0130228	0.0457764	Significant	-1.47884	-1.11295	NPX ~ NPC1 * Age_c + Sex + Error(SampleID)	39	1.67
IFI30	ENSG00000216490	Oncology_II	P13284	OID31505	NPC1	0.146323	0.0129973	0.0457764	Significant	0.50286	0.832744	NPX ~ NPC1 * Age_c + Sex + Error(SampleID)	39	0.93
CHGB	ENSG00000089199	Neurology	P05060	OID21038	NPC1	0.147371	0.0130624	0.0458548	Significant	0.467672	0.593156	NPX ~ NPC1 * Age_c + Sex + Error(SampleID)	39	0.47
DCTN2	ENSG00000175203	Oncology	Q13561	OID21334	NPC1	0.155614	0.013187	0.0462352	Significant	-1.51278	-1.31145	NPX ~ NPC1 * Age_c + Sex + Error(SampleID)	37	2.21
CD209	ENSG00000090659	Cardiometabolic	Q9NNX6	OID20262	NPC1	0.149431	0.0132516	0.046405	Significant	-0.287047	-0.306451	NPX ~ NPC1 * Age_c + Sex + Error(SampleID)	39	0.13
LUZP2	ENSG00000187398	Oncology_II	Q86TE4	OID31402	NPC1	0.145943	0.0132696	0.0464112	Significant	0.370926	0.581166	NPX ~ NPC1 * Age_c + Sex + Error(SampleID)	39	0.46
ING1	ENSG00000153487	Neurology	Q9UK53	OID20853	NPC1	0.164307	0.0133157	0.0465156	Significant	-0.934472	-0.889706	NPX ~ NPC1 * Age_c + Sex + Error(SampleID)	35	0.91
BGN	ENSG00000182492	Oncology	P21810	OID21198	NPC1	0.158294	0.0133363	0.0465305	Significant	1.37164	1.63821	NPX ~ NPC1 * Age_c + Sex + Error(SampleID)	36	3.37
DECR1	ENSG00000104325	Inflammation	Q16698	OID20579	NPC1	0.123364	0.0134252	0.0467837	Significant	-0.783703	-0.757309	NPX ~ NPC1 * Age_c + Sex + Error(SampleID)	37	0.82
CDC42BPB	ENSG00000198752	Oncology_II	Q9Y5S2	OID31485	NPC1	0.15005	0.0134467	0.0468018	Significant	-1.00248	-0.874518	NPX ~ NPC1 * Age_c + Sex + Error(SampleID)	39	1.04
KCNIP4	ENSG00000185774	Neurology	Q6PIL6	OID20813	NPC1	0.159668	0.0135124	0.0469164	Significant	0.660289	1.15179	NPX ~ NPC1 * Age_c + Sex + Error(SampleID)	35	1.54
COL9A2	ENSG00000049089	Oncology_II	Q14055	OID31255	NPC1	0.158202	0.0135218	0.0469164	Significant	0.665222	1.04384	NPX ~ NPC1 * Age_c + Sex + Error(SampleID)	37	1.43
FBN2	ENSG00000138829	Neurology_II	P35556	OID30974	NPC1	0.167478	0.0135452	0.0469164	Significant	0.551943	0.745982	NPX ~ NPC1 * Age_c + Sex + Error(SampleID)	35	0.67
COMP	ENSG00000105664	Cardiometabolic	P49747	OID20405	NPC1	0.149304	0.0135357	0.0469164	Significant	-0.497615	-0.418841	NPX ~ NPC1 * Age_c + Sex + Error(SampleID)	39	0.24
ACHE	ENSG00000087085	Inflammation_II	P22303	OID30585	Age_c	0.21275	0.00240337	0.0470961	Significant	-0.158972	-0.031573	NPX ~ NPC1 * Age_c + Sex + Error(SampleID)		0.11
FCAMR	ENSG00000162897	Cardiometabolic_II	Q8WWV6	OID30332	NPC1	0.140614	0.0136903	0.0473614	Significant	0.286295	0.554791	NPX ~ NPC1 * Age_c + Sex + Error(SampleID)	38	0.40
GRIK2	ENSG00000164418	Neurology_II	Q13002	OID30977	Age_c	0.21213	0.00244351	0.047557	Significant	-0.00231917	0.0654147	NPX ~ NPC1 * Age_c + Sex + Error(SampleID)		0.47
BANK1	ENSG00000153064	Inflammation	Q8NDB2	OID20594	NPC1	0.14223	0.0137685	0.0475744	Significant	-0.922685	-1.01046	NPX ~ NPC1 * Age_c + Sex + Error(SampleID)	37	1.46
ITGB1BP2	ENSG00000147166	Cardiometabolic	Q9UKP3	OID20112	NPC1	0.143806	0.0138189	0.0476911	Significant	-1.48902	-1.31868	NPX ~ NPC1 * Age_c + Sex + Error(SampleID)	32	2.08
CRH	ENSG00000147571	Oncology	P06850	OID21257	Age_c	0.227441	0.00246774	0.0477041	Significant	-2.22348	-0.114133	NPX ~ NPC1 * Age_c + Sex + Error(SampleID)		1.18
ITGAM	ENSG00000169896	Neurology	P11215	OID21071	Age_c	0.21146	0.00248765	0.0477662	Significant	-0.558353	-0.040004	NPX ~ NPC1 * Age_c + Sex + Error(SampleID)		0.18
FCN2	ENSG00000160339	Cardiometabolic	Q15485	OID20382	NPC1	0.147539	0.014146	0.0487609	Significant	-0.545964	-0.447124	NPX ~ NPC1 * Age_c + Sex + Error(SampleID)	39	0.28
AHNAK	ENSG00000124942	Cardiometabolic_II	Q09666	OID30260	NPC1	0.148717	0.0142616	0.0491003	Significant	-0.376354	-0.467465	NPX ~ NPC1 * Age_c + Sex + Error(SampleID)	38	0.29
EDN1	ENSG00000078401	Cardiometabolic_II	P05305	OID30224	NPC1	0.148055	0.0143191	0.0492391	Significant	0.473472	0.475114	NPX ~ NPC1 * Age_c + Sex + Error(SampleID)	38	0.30
ANXA1	ENSG00000135046	Inflammation_II	P04083	OID30617	NPC1	0.147708	0.014381	0.0493926	Significant	-1.07679	-0.923116	NPX ~ NPC1 * Age_c + Sex + Error(SampleID)	39	1.18
SPINK1	ENSG00000164266	Neurology	P00995	OID21097	NPC1	0.140488	0.014492	0.0497141	Significant	0.184062	0.345095	NPX ~ NPC1 * Age_c + Sex + Error(SampleID)	39	0.17
IGFBP2	ENSG00000115457	Cardiometabolic	P18065	OID20325	Age_c	0.20953	0.00261907	0.0499544	Significant	0.459987	-0.0662817	NPX ~ NPC1 * Age_c + Sex + Error(SampleID)		0.49
PTPRS	ENSG00000105426	Cardiometabolic	Q13332	OID20306	NPC1	0.142523	0.0147024	0.0503755	Significant	-0.138738	-0.201502	NPX ~ NPC1 * Age_c + Sex + Error(SampleID)	39	0.06
GOPC	ENSG00000047932	Inflammation	Q9HD26	OID20551	NPC1	0.12836	0.0148535	0.0508324	Significant	-0.83316	-0.835746	NPX ~ NPC1 * Age_c + Sex + Error(SampleID)	37	1.03
STX1B	ENSG00000099365	Neurology_II	P61266	OID30934	NPC1	0.16529	0.0149656	0.0511548	Significant	0.459278	0.660033	NPX ~ NPC1 * Age_c + Sex + Error(SampleID)	35	0.54
DGKZ	ENSG00000149091	Inflammation	Q13574	OID20466	NPC1	0.153466	0.0150245	0.0512503	Significant	-1.02545	-0.772859	NPX ~ NPC1 * Age_c + Sex + Error(SampleID)	36	0.68
VSIG2	ENSG00000019102	Oncology_II	Q96IQ7	OID31371	NPC1	0.140169	0.0150373	0.0512503	Significant	0.471073	0.485635	NPX ~ NPC1 * Age_c + Sex + Error(SampleID)	39	0.33
CNTN3	ENSG00000113805	Neurology	Q9P232	OID21092	NPC1	0.141633	0.0150652	0.0512503	Significant	-0.271374	-0.402789	NPX ~ NPC1 * Age_c + Sex + Error(SampleID)	39	0.23
RARRES2	ENSG00000106538	Cardiometabolic	Q99969	OID20373	NPC1	0.14401	0.0150554	0.0512503	Significant	-0.362809	-0.334178	NPX ~ NPC1 * Age_c + Sex + Error(SampleID)	39	0.16
TMEM132A	ENSG00000006118	Cardiometabolic_II	Q24JP5	OID30287	NPC1	0.146112	0.0150879	0.05126	Significant	0.876498	1.09013	NPX ~ NPC1 * Age_c + Sex + Error(SampleID)	38	1.59
CALCB	ENSG00000175868	Neurology_II	P10092	OID31100	NPC1	0.142914	0.0151039	0.05126	Significant	0.439412	0.508715	NPX ~ NPC1 * Age_c + Sex + Error(SampleID)	39	0.36
OBP2B	ENSG00000171102	Neurology	Q9NPH6	OID20980	Age_c	0.213224	0.00270553	0.0512617	Significant	-0.481557	0.0907012	NPX ~ NPC1 * Age_c + Sex + Error(SampleID)		0.92
WASF3	ENSG00000132970	Neurology	Q9UPY6	OID20882	NPC1	0.158256	0.015172	0.0514303	Significant	-1.94027	-1.90081	NPX ~ NPC1 * Age_c + Sex + Error(SampleID)	35	4.34
IL1R1	ENSG00000115594	Neurology	P14778	OID21116	NPC1	0.142866	0.015202	0.0514711	Significant	0.209594	0.227866	NPX ~ NPC1 * Age_c + Sex + Error(SampleID)	39	0.07
PPP1R9B	ENSG00000108819	Inflammation	Q96SB3	OID20643	NPC1	0.148315	0.0152964	0.0517292	Significant	-1.06607	-0.991466	NPX ~ NPC1 * Age_c + Sex + Error(SampleID)	37	1.37
BAX	ENSG00000087088	Neurology	Q07812	OID20856	NPC1	0.159317	0.0153454	0.0518337	Significant	-2.24596	-1.85076	NPX ~ NPC1 * Age_c + Sex + Error(SampleID)	35	4.13
ART3	ENSG00000156219	Cardiometabolic	Q13508	OID20346	Age_c	0.207627	0.00275528	0.0518608	Significant	-0.504747	0.0361664	NPX ~ NPC1 * Age_c + Sex + Error(SampleID)		0.15
HHEX	ENSG00000152804	Neurology_II	Q03014	OID31107	NPC1	0.144046	0.0154175	0.0520159	Significant	-0.891352	-0.768442	NPX ~ NPC1 * Age_c + Sex + Error(SampleID)	39	0.84
RABEP1	ENSG00000029725	Inflammation_II	Q15276	OID30647	NPC1	0.144615	0.0154917	0.0522047	Significant	-1.77378	-1.45149	NPX ~ NPC1 * Age_c + Sex + Error(SampleID)	39	2.99
SPTBN2	ENSG00000173898	Neurology_II	O15020	OID30876	NPC1	0.14795	0.0155371	0.0522685	Significant	0.844539	0.762511	NPX ~ NPC1 * Age_c + Sex + Error(SampleID)	38	0.81
GLA	ENSG00000102393	Inflammation_II	P06280	OID30594	NPC1	0.142826	0.0155472	0.0522685	Significant	-0.321773	-0.273112	NPX ~ NPC1 * Age_c + Sex + Error(SampleID)	39	0.11
COL9A1	ENSG00000112280	Inflammation	P20849	OID20550	NPC1:Age_c	0.314987	0.000201631	0.0524423	Significant	0.13311	0.172595	NPX ~ NPC1 * Age_c + Sex + Error(SampleID)		2.01
CKB	ENSG00000166165	Cardiometabolic_II	P12277	OID30400	NPC1:Age_c	0.295551	0.00023929	0.0526623	Significant	0.4799	0.0747308	NPX ~ NPC1 * Age_c + Sex + Error(SampleID)		0.39
SMAD5	ENSG00000113658	Oncology	Q99717	OID21353	NPC1:Age_c	0.310916	0.000226265	0.0526623	Significant	0.190266	-0.04208	NPX ~ NPC1 * Age_c + Sex + Error(SampleID)		0.12
SCN4B	ENSG00000177098	Cardiometabolic_II	Q8IWT1	OID30277	NPC1	0.144274	0.0157882	0.0530166	Significant	-0.375987	-0.436057	NPX ~ NPC1 * Age_c + Sex + Error(SampleID)	38	0.26
KIR2DL3	ENSG00000243772	Oncology	P43628	OID21196	NPC1	0.15109	0.0158503	0.0531626	Significant	0.791981	0.80648	NPX ~ NPC1 * Age_c + Sex + Error(SampleID)	36	0.86
FSHB	ENSG00000131808	Cardiometabolic_II	P01225	OID30233	Sex	0.295575	0.000288242	0.0533422	Significant	0.639233	-0.41842	NPX ~ NPC1 * Age_c + Sex + Error(SampleID)		0.45
DPP6	ENSG00000130226	Oncology	P42658	OID21354	Sex	0.305822	0.000261158	0.0533422	Significant	0.7031	-0.362649	NPX ~ NPC1 * Age_c + Sex + Error(SampleID)		0.32
PTPRN2	ENSG00000155093	Neurology	Q92932	OID20912	Sex	0.294367	0.000298314	0.0533422	Significant	0.664703	-0.345581	NPX ~ NPC1 * Age_c + Sex + Error(SampleID)		0.31
RBFOX3	ENSG00000167281	Neurology_II	A6NFN3	OID30984	NPC1	0.140078	0.0160246	0.0536843	Significant	0.357357	0.413969	NPX ~ NPC1 * Age_c + Sex + Error(SampleID)	39	0.25
SLK	ENSG00000065613	Oncology_II	Q9H2G2	OID31282	NPC1	0.128391	0.0161	0.0536855	Significant	-3.09721	-2.20651	NPX ~ NPC1 * Age_c + Sex + Error(SampleID)	37	6.77
CEBPB	ENSG00000172216	Cardiometabolic	P17676	OID20052	NPC1	0.13643	0.0160626	0.0536855	Significant	-1.45402	-1.24286	NPX ~ NPC1 * Age_c + Sex + Error(SampleID)	32	1.94
FEN1	ENSG00000168496	Oncology	P39748	OID21192	NPC1	0.150264	0.0160831	0.0536855	Significant	-1.2718	-1.16771	NPX ~ NPC1 * Age_c + Sex + Error(SampleID)	36	1.82
CNPY4	ENSG00000166997	Oncology	Q8N129	OID21317	NPC1	0.148003	0.0160588	0.0536855	Significant	-0.478473	-0.37694	NPX ~ NPC1 * Age_c + Sex + Error(SampleID)	37	0.19
IL1RL1	ENSG00000115602	Cardiometabolic	Q01638	OID20250	Age_c	0.205972	0.00287922	0.0537936	Significant	-0.0514158	0.0548743	NPX ~ NPC1 * Age_c + Sex + Error(SampleID)		0.34
SERPINA6	ENSG00000170099	Inflammation_II	P08185	OID30743	Age_c	0.205759	0.00289556	0.0537936	Significant	-0.153972	-0.027827	NPX ~ NPC1 * Age_c + Sex + Error(SampleID)		0.09
RAB11FIP3	ENSG00000090565	Cardiometabolic_II	O75154	OID30325	NPC1	0.15562	0.016177	0.0538794	Significant	-1.72349	-1.45827	NPX ~ NPC1 * Age_c + Sex + Error(SampleID)	38	2.91
PM20D1	ENSG00000162877	Cardiometabolic	Q6GTS8	OID20149	NPC1	0.135261	0.016257	0.0540828	Significant	-0.730499	-1.81246	NPX ~ NPC1 * Age_c + Sex + Error(SampleID)	39	4.74
TNFSF12	ENSG00000239697	Inflammation	O43508	OID20624	NPC1	0.145746	0.0163251	0.0542464	Significant	-0.361757	-0.30789	NPX ~ NPC1 * Age_c + Sex + Error(SampleID)	37	0.13
CTSH	ENSG00000103811	Cardiometabolic	P09668	OID20113	NPC1	0.154112	0.0163684	0.0542643	Significant	-0.684989	-0.726864	NPX ~ NPC1 * Age_c + Sex + Error(SampleID)	32	0.67
WFDC2	ENSG00000101443	Oncology	Q14508	OID21505	NPC1	0.13829	0.0163668	0.0542643	Significant	0.396224	0.354032	NPX ~ NPC1 * Age_c + Sex + Error(SampleID)	39	0.18
TEX101	ENSG00000131126	Neurology_II	Q9BY14	OID30971	NPC1	0.150556	0.0164172	0.0543628	Significant	0.560713	0.903641	NPX ~ NPC1 * Age_c + Sex + Error(SampleID)	35	1.04
SIRT1	ENSG00000096717	Inflammation_II	Q96EB6	OID30439	NPC1	0.140857	0.0164551	0.0544256	Significant	-0.859817	-0.818504	NPX ~ NPC1 * Age_c + Sex + Error(SampleID)	39	0.97
CABP2	ENSG00000167791	Neurology_II	Q9NPB3	OID30916	NPC1	0.143292	0.0165283	0.0545864	Significant	-1.34302	-1.13945	NPX ~ NPC1 * Age_c + Sex + Error(SampleID)	35	1.66
MEP1A	ENSG00000112818	Oncology_II	Q16819	OID31459	NPC1	0.139918	0.0165419	0.0545864	Significant	0.958221	1.08445	NPX ~ NPC1 * Age_c + Sex + Error(SampleID)	39	1.71
KIT	ENSG00000157404	Cardiometabolic	P10721	OID20370	NPC1	0.140796	0.0166973	0.0549725	Significant	-0.289417	-0.250743	NPX ~ NPC1 * Age_c + Sex + Error(SampleID)	39	0.09
CST3	ENSG00000101439	Cardiometabolic	P01034	OID20400	NPC1	0.139513	0.0166891	0.0549725	Significant	0.207023	0.213455	NPX ~ NPC1 * Age_c + Sex + Error(SampleID)	39	0.07
ADAM9	ENSG00000168615	Oncology_II	Q13443	OID31488	NPC1	0.139953	0.0168196	0.0553112	Significant	0.506555	0.423671	NPX ~ NPC1 * Age_c + Sex + Error(SampleID)	39	0.26
PYDC1	ENSG00000169900	Cardiometabolic_II	Q8WXC3	OID30202	NPC1	0.141075	0.016845	0.0553314	Significant	0.430509	0.55481	NPX ~ NPC1 * Age_c + Sex + Error(SampleID)	38	0.43
REN	ENSG00000143839	Cardiometabolic	P00797	OID20201	NPC1	0.136766	0.0168932	0.0554259	Significant	-0.337561	-0.415335	NPX ~ NPC1 * Age_c + Sex + Error(SampleID)	39	0.25
MYL4	ENSG00000198336	Cardiometabolic_II	P12829	OID30245	NPC1	0.141368	0.0169251	0.055467	Significant	1.69366	1.75993	NPX ~ NPC1 * Age_c + Sex + Error(SampleID)	38	4.31
HDAC9	ENSG00000048052	Neurology_II	Q9UKV0	OID30832	NPC1	0.132054	0.0171577	0.0559727	Significant	1.27427	2.23162	NPX ~ NPC1 * Age_c + Sex + Error(SampleID)	38	7.15
CDKN2D	ENSG00000129355	Oncology	P55273	OID21295	NPC1	0.145048	0.0171463	0.0559727	Significant	-2.3893	-1.93707	NPX ~ NPC1 * Age_c + Sex + Error(SampleID)	37	5.24
EIF4G3	ENSG00000075151	Neurology_II	O43432	OID31022	NPC1	0.140752	0.0171087	0.0559727	Significant	-1.49143	-1.29585	NPX ~ NPC1 * Age_c + Sex + Error(SampleID)	39	2.46
DTX3	ENSG00000178498	Oncology	Q8N9I9	OID21349	NPC1	0.144948	0.0171374	0.0559727	Significant	-0.28487	-0.312668	NPX ~ NPC1 * Age_c + Sex + Error(SampleID)	37	0.14
SIGLEC6	ENSG00000105492	Oncology	O43699	OID21394	Age_c	0.2086	0.00305177	0.0563298	Significant	0.294451	-0.0362562	NPX ~ NPC1 * Age_c + Sex + Error(SampleID)		0.15
CEBPA	ENSG00000245848	Inflammation_II	P49715	OID30458	NPC1	0.1403	0.0173004	0.056374	Significant	-0.819283	-0.655397	NPX ~ NPC1 * Age_c + Sex + Error(SampleID)	39	0.63
BACH1	ENSG00000156273	Inflammation	O14867	OID20505	NPC1	0.116554	0.017344	0.056452	Significant	-1.00386	-0.942344	NPX ~ NPC1 * Age_c + Sex + Error(SampleID)	37	1.37
FADD	ENSG00000168040	Cardiometabolic	Q13158	OID20151	NPC1	0.140187	0.0173783	0.0564992	Significant	-1.44394	-1.18444	NPX ~ NPC1 * Age_c + Sex + Error(SampleID)	39	2.07
FGFR2	ENSG00000066468	Oncology	P21802	OID21478	Age_c	0.203331	0.00308827	0.056638	Significant	0.253068	-0.0269992	NPX ~ NPC1 * Age_c + Sex + Error(SampleID)		0.08
EGLN1	ENSG00000135766	Inflammation	Q9GZT9	OID20572	NPC1	0.115422	0.0174607	0.0567028	Significant	-1.44558	-1.37339	NPX ~ NPC1 * Age_c + Sex + Error(SampleID)	37	2.92
SEZ6L2	ENSG00000174938	Oncology	Q6UXD5	OID21289	NPC1	0.142286	0.0175352	0.05688	Significant	0.149486	0.288699	NPX ~ NPC1 * Age_c + Sex + Error(SampleID)	37	0.12
TEK	ENSG00000120156	Oncology	Q02763	OID21496	NPC1	0.136051	0.0176967	0.0573389	Significant	0.12457	0.210232	NPX ~ NPC1 * Age_c + Sex + Error(SampleID)	39	0.07
COL2A1	ENSG00000139219	Cardiometabolic_II	P02458	OID30286	NPC1:Age_c	0.29526	0.000290836	0.0574865	Significant	-0.542329	0.114703	NPX ~ NPC1 * Age_c + Sex + Error(SampleID)		0.90
RTN4R	ENSG00000040608	Oncology	Q9BZR6	OID21424	NPC1:Age_c	0.294004	0.000301397	0.0574865	Significant	0.391875	-0.0250271	NPX ~ NPC1 * Age_c + Sex + Error(SampleID)		0.05
HBEGF	ENSG00000113070	Oncology	Q99075	OID21465	NPC1	0.135798	0.0178787	0.0578631	Significant	-0.714147	-0.723676	NPX ~ NPC1 * Age_c + Sex + Error(SampleID)	38	0.79
MAPKAPK2	ENSG00000162889	Oncology_II	P49137	OID31293	NPC1	0.132194	0.0179985	0.0581192	Significant	-2.2737	-1.92944	NPX ~ NPC1 * Age_c + Sex + Error(SampleID)	37	5.37
COQ7	ENSG00000167186	Cardiometabolic_II	Q99807	OID30217	NPC1	0.139121	0.0179956	0.0581192	Significant	0.685869	0.711577	NPX ~ NPC1 * Age_c + Sex + Error(SampleID)	38	0.72
REG1B	ENSG00000172023	Cardiometabolic	P48304	OID20266	NPC1	0.133354	0.0181072	0.0584043	Significant	0.393999	0.549257	NPX ~ NPC1 * Age_c + Sex + Error(SampleID)	39	0.45
PRDX3	ENSG00000165672	Inflammation	P30048	OID20483	NPC1	0.145399	0.0181821	0.058514	Significant	0.708811	0.773044	NPX ~ NPC1 * Age_c + Sex + Error(SampleID)	36	0.72
F12	ENSG00000131187	Inflammation_II	P00748	OID30739	NPC1	0.136248	0.0181747	0.058514	Significant	-0.557527	-0.527233	NPX ~ NPC1 * Age_c + Sex + Error(SampleID)	39	0.42
RAB10	ENSG00000084733	Cardiometabolic_II	P61026	OID30357	NPC1	0.152903	0.0183081	0.0587925	Significant	-1.58607	-1.28369	NPX ~ NPC1 * Age_c + Sex + Error(SampleID)	38	2.35
LSP1	ENSG00000130592	Inflammation	P33241	OID20530	NPC1	0.113383	0.0183097	0.0587925	Significant	-0.944743	-0.893197	NPX ~ NPC1 * Age_c + Sex + Error(SampleID)	37	1.25
CD14	ENSG00000170458	Cardiometabolic	P08571	OID20378	NPC1	0.136084	0.0184025	0.0590241	Significant	0.357642	0.370167	NPX ~ NPC1 * Age_c + Sex + Error(SampleID)	39	0.21
SPTLC1	ENSG00000090054	Neurology_II	O15269	OID31086	NPC1	0.137008	0.0184666	0.0591635	Significant	-0.887395	-0.722293	NPX ~ NPC1 * Age_c + Sex + Error(SampleID)	39	0.79
GHRL	ENSG00000157017	Cardiometabolic	Q9UBU3	OID20175	NPC1	0.134803	0.018492	0.0591784	Significant	1.02457	1.00202	NPX ~ NPC1 * Age_c + Sex + Error(SampleID)	39	1.51
GASK1A	ENSG00000144649	Cardiometabolic_II	Q9UFP1	OID30109	Age_c	0.201161	0.00327099	0.0593809	Significant	-0.180237	0.0803121	NPX ~ NPC1 * Age_c + Sex + Error(SampleID)		0.76
NAGPA	ENSG00000103174	Inflammation_II	Q9UK23	OID30643	Age_c	0.201065	0.00327934	0.0593809	Significant	0.172148	-0.022357	NPX ~ NPC1 * Age_c + Sex + Error(SampleID)		0.06
GAST	ENSG00000184502	Neurology_II	P01350	OID31083	NPC1	0.133	0.0185936	0.0594371	Significant	0.229948	0.302584	NPX ~ NPC1 * Age_c + Sex + Error(SampleID)	39	0.14
PLCB2	ENSG00000137841	Neurology_II	Q00722	OID31155	NPC1	0.136769	0.0188895	0.0602541	Significant	-1.77422	-1.4502	NPX ~ NPC1 * Age_c + Sex + Error(SampleID)	39	3.19
MLN	ENSG00000096395	Inflammation	P12872	OID20541	NPC1	0.11866	0.0188913	0.0602541	Significant	0.945297	0.762114	NPX ~ NPC1 * Age_c + Sex + Error(SampleID)	37	0.92
SPRING1	ENSG00000111412	Oncology_II	Q9H741	OID31197	NPC1	0.133756	0.0189518	0.0603797	Significant	0.616217	0.697486	NPX ~ NPC1 * Age_c + Sex + Error(SampleID)	39	0.74
HBQ1	ENSG00000086506	Oncology	P09105	OID21433	NPC1	0.137376	0.0189818	0.0604081	Significant	1.09852	1.12772	NPX ~ NPC1 * Age_c + Sex + Error(SampleID)	38	1.95
MAPK9	ENSG00000050748	Inflammation	P45984	OID20557	NPC1	0.1195	0.0190876	0.0606775	Significant	-0.500241	-0.498652	NPX ~ NPC1 * Age_c + Sex + Error(SampleID)	37	0.40
PTH1R	ENSG00000160801	Inflammation	Q03431	OID20571	NPC1	0.147597	0.0191369	0.0607666	Significant	0.228853	0.232013	NPX ~ NPC1 * Age_c + Sex + Error(SampleID)	37	0.09
CPXM1	ENSG00000088882	Oncology	Q96SM3	OID21479	NPC1	0.135133	0.0192141	0.0609441	Significant	-0.786832	-0.639727	NPX ~ NPC1 * Age_c + Sex + Error(SampleID)	39	0.62
RNASE6	ENSG00000169413	Inflammation_II	Q93091	OID30689	NPC1	0.133934	0.019266	0.0610409	Significant	0.195051	0.207414	NPX ~ NPC1 * Age_c + Sex + Error(SampleID)	39	0.07
TREML2	ENSG00000112195	Neurology	Q5T2D2	OID21120	NPC1	0.131839	0.0192945	0.0610636	Significant	0.261418	0.405347	NPX ~ NPC1 * Age_c + Sex + Error(SampleID)	39	0.25
SERPIND1	ENSG00000099937	Inflammation_II	P05546	OID30767	NPC1	0.132155	0.0193943	0.0613116	Significant	-0.342811	-0.408648	NPX ~ NPC1 * Age_c + Sex + Error(SampleID)	39	0.26
UBAC1	ENSG00000130560	Oncology	Q9BSL1	OID21336	NPC1	0.13922	0.0194369	0.0613785	Significant	0.633722	0.600401	NPX ~ NPC1 * Age_c + Sex + Error(SampleID)	37	0.53
MSTN	ENSG00000138379	Cardiometabolic	O14793	OID20115	Age_c	0.238076	0.00341884	0.0615176	Significant	-1.30156	0.095113	NPX ~ NPC1 * Age_c + Sex + Error(SampleID)		0.71
TINAGL1	ENSG00000142910	Cardiometabolic	Q9GZM7	OID20180	NPC1	0.135061	0.01953	0.0616044	Significant	0.300799	0.245283	NPX ~ NPC1 * Age_c + Sex + Error(SampleID)	39	0.09
TEF	ENSG00000167074	Cardiometabolic_II	Q10587	OID30103	NPC1	0.131054	0.0197974	0.0623792	Significant	0.787304	0.840191	NPX ~ NPC1 * Age_c + Sex + Error(SampleID)	39	1.09
ROBO1	ENSG00000169855	Inflammation	Q9Y6N7	OID20734	NPC1	0.132128	0.0199234	0.0627072	Significant	0.301276	0.402125	NPX ~ NPC1 * Age_c + Sex + Error(SampleID)	39	0.25
DBI	ENSG00000155368	Neurology	P07108	OID21143	NPC1	0.134422	0.0199843	0.0627607	Significant	-1.3421	-1.07197	NPX ~ NPC1 * Age_c + Sex + Error(SampleID)	39	1.78
XPNPEP2	ENSG00000122121	Oncology	O43895	OID21508	NPC1	0.130502	0.0199658	0.0627607	Significant	0.515139	0.809664	NPX ~ NPC1 * Age_c + Sex + Error(SampleID)	39	1.01
ADAMTS8	ENSG00000134917	Oncology	Q9UP79	OID21502	NPC1	0.133494	0.0200482	0.0628925	Significant	-0.57445	-0.458772	NPX ~ NPC1 * Age_c + Sex + Error(SampleID)	39	0.33
S100A11	ENSG00000163191	Cardiometabolic	P31949	OID20130	NPC1	0.134525	0.0201022	0.0629928	Significant	-0.833111	-0.697129	NPX ~ NPC1 * Age_c + Sex + Error(SampleID)	39	0.75
EVI5	ENSG00000067208	Inflammation_II	O60447	OID30519	NPC1	0.134805	0.0201447	0.063057	Significant	-1.90547	-1.42677	NPX ~ NPC1 * Age_c + Sex + Error(SampleID)	39	3.16
BCAN	ENSG00000132692	Neurology	Q96GW7	OID20998	NPC1	0.139154	0.0201804	0.0630997	Significant	0.248833	0.354068	NPX ~ NPC1 * Age_c + Sex + Error(SampleID)	38	0.20
CHRDL1	ENSG00000101938	Inflammation	Q9BU40	OID20771	NPC1	0.133237	0.0202082	0.0631175	Significant	0.474979	0.360416	NPX ~ NPC1 * Age_c + Sex + Error(SampleID)	39	0.20
KRT8	ENSG00000170421	Neurology_II	P05787	OID30865	Age_c	0.202737	0.00355281	0.0632854	Significant	0.912475	0.190354	NPX ~ NPC1 * Age_c + Sex + Error(SampleID)		4.16
OSTN	ENSG00000188729	Neurology_II	P61366	OID30909	Age_c	0.218181	0.00356133	0.0632854	Significant	0.963543	-0.145334	NPX ~ NPC1 * Age_c + Sex + Error(SampleID)		2.28
CLEC3B	ENSG00000163815	Inflammation_II	P05452	OID30756	NPC1	0.131864	0.020409	0.0635564	Significant	-0.677596	-0.637724	NPX ~ NPC1 * Age_c + Sex + Error(SampleID)	39	0.63
TIGAR	ENSG00000078237	Neurology	Q9NQ88	OID20894	NPC1	0.146257	0.0203858	0.0635564	Significant	-0.661881	-0.601637	NPX ~ NPC1 * Age_c + Sex + Error(SampleID)	35	0.48
KEL	ENSG00000197993	Neurology	P23276	OID20881	NPC1	0.145078	0.0204154	0.0635564	Significant	0.396078	0.390571	NPX ~ NPC1 * Age_c + Sex + Error(SampleID)	35	0.20
EIF2AK3	ENSG00000172071	Cardiometabolic_II	Q9NZJ5	OID30060	NPC1	0.13356	0.0204581	0.0636204	Significant	-1.77522	-1.49628	NPX ~ NPC1 * Age_c + Sex + Error(SampleID)	39	3.49
IPCEF1	ENSG00000074706	Neurology	Q8WWN9	OID20977	NPC1	0.124801	0.0205197	0.0637426	Significant	-1.32839	-1.16597	NPX ~ NPC1 * Age_c + Sex + Error(SampleID)	38	2.14
VGF	ENSG00000128564	Neurology_II	O15240	OID31067	NPC1	0.127954	0.0205573	0.0637899	Significant	0.335417	0.50847	NPX ~ NPC1 * Age_c + Sex + Error(SampleID)	39	0.40
MATN2	ENSG00000132561	Inflammation	O00339	OID20767	Age_c	0.197364	0.00361626	0.063865	Significant	-0.205739	-0.0277969	NPX ~ NPC1 * Age_c + Sex + Error(SampleID)		0.09
LAMA4	ENSG00000112769	Inflammation	Q16363	OID20769	Age_c	0.196978	0.00365328	0.0641229	Significant	-0.398909	-0.054448	NPX ~ NPC1 * Age_c + Sex + Error(SampleID)		0.36
ARHGAP45	ENSG00000180448	Inflammation_II	Q92619	OID30653	NPC1	0.133384	0.0207862	0.0644306	Significant	-0.962058	-0.761693	NPX ~ NPC1 * Age_c + Sex + Error(SampleID)	39	0.91
NCAM1	ENSG00000149294	Cardiometabolic	P13591	OID20354	Age_c	0.19626	0.00372314	0.0649506	Significant	-0.167825	-0.0301495	NPX ~ NPC1 * Age_c + Sex + Error(SampleID)		0.11
MTUS1	ENSG00000129422	Oncology_II	Q9ULD2	OID31315	NPC1	0.132602	0.0211927	0.0656193	Significant	0.5922	0.689921	NPX ~ NPC1 * Age_c + Sex + Error(SampleID)	37	0.73
ENTPD6	ENSG00000197586	Cardiometabolic	O75354	OID20100	NPC1	0.146598	0.0212196	0.0656316	Significant	0.231384	0.205174	NPX ~ NPC1 * Age_c + Sex + Error(SampleID)	32	0.06
FCAMR	ENSG00000162897	Cardiometabolic_II	Q8WWV6	OID30332	Age_c	0.200222	0.00379138	0.0657402	Significant	0.286295	-0.0574864	NPX ~ NPC1 * Age_c + Sex + Error(SampleID)		0.40
TGFBR3	ENSG00000069702	Cardiometabolic	Q03167	OID20255	NPC1	0.131862	0.0213278	0.065895	Significant	0.35991	0.254046	NPX ~ NPC1 * Age_c + Sex + Error(SampleID)	39	0.10
GSAP	ENSG00000186088	Oncology	A4D1B5	OID21173	NPC1	0.138117	0.021394	0.0659572	Significant	-1.37849	-0.971002	NPX ~ NPC1 * Age_c + Sex + Error(SampleID)	36	1.39
ITPR1	ENSG00000150995	Cardiometabolic_II	Q14643	OID30216	NPC1	0.132368	0.0213718	0.0659572	Significant	0.672504	0.617167	NPX ~ NPC1 * Age_c + Sex + Error(SampleID)	38	0.57
MARS1	ENSG00000166986	Inflammation_II	P56192	OID30658	NPC1	0.132212	0.0214689	0.0661168	Significant	-1.02527	-0.790196	NPX ~ NPC1 * Age_c + Sex + Error(SampleID)	39	0.99
APOF	ENSG00000175336	Inflammation_II	Q13790	OID30701	NPC1	0.130514	0.0216269	0.0665318	Significant	-0.417202	-0.384472	NPX ~ NPC1 * Age_c + Sex + Error(SampleID)	39	0.24
CD34	ENSG00000174059	Neurology	P28906	OID21025	NPC1:Age_c	0.280216	0.000372659	0.0666361	Significant	-0.169823	0.0277294	NPX ~ NPC1 * Age_c + Sex + Error(SampleID)		0.06
FKBP14	ENSG00000106080	Neurology_II	Q9NWM8	OID31065	Age_c	0.194573	0.00389228	0.0670831	Significant	-1.97634	-0.0933854	NPX ~ NPC1 * Age_c + Sex + Error(SampleID)		1.07
CNTNAP2	ENSG00000174469	Inflammation	Q9UHC6	OID20556	Age_c	0.203792	0.00391875	0.0671244	Significant	1.16949	-0.0591293	NPX ~ NPC1 * Age_c + Sex + Error(SampleID)		0.42
DPP10	ENSG00000175497	Inflammation	Q8N608	OID20527	Age_c	0.203561	0.00394159	0.0671244	Significant	0.716784	-0.0464836	NPX ~ NPC1 * Age_c + Sex + Error(SampleID)		0.26
MERTK	ENSG00000153208	Inflammation	Q12866	OID20657	NPC1	0.133896	0.0218631	0.0671862	Significant	0.334935	0.336228	NPX ~ NPC1 * Age_c + Sex + Error(SampleID)	37	0.18
IL1RAP	ENSG00000196083	Neurology	Q9NPH3	OID21126	NPC1	0.129236	0.0219371	0.0673411	Significant	-0.339555	-0.372	NPX ~ NPC1 * Age_c + Sex + Error(SampleID)	39	0.22
RAB39B	ENSG00000155961	Cardiometabolic_II	Q96DA2	OID30069	NPC1	0.130285	0.0220049	0.0674048	Significant	-1.43736	-1.26589	NPX ~ NPC1 * Age_c + Sex + Error(SampleID)	39	2.56
CRELD1	ENSG00000163703	Inflammation_II	Q96HD1	OID30619	NPC1	0.126322	0.0220022	0.0674048	Significant	-0.207789	-0.28108	NPX ~ NPC1 * Age_c + Sex + Error(SampleID)	39	0.13
DRAXIN	ENSG00000162490	Neurology	Q8NBI3	OID20917	Age_c	0.198236	0.00399065	0.0675577	Significant	0.871732	-0.0841063	NPX ~ NPC1 * Age_c + Sex + Error(SampleID)		0.87
SYNGAP1	ENSG00000197283	Neurology_II	Q96PV0	OID30797	NPC1	0.131215	0.0220914	0.0675974	Significant	0.965969	1.01189	NPX ~ NPC1 * Age_c + Sex + Error(SampleID)	38	1.60
TXNRD1	ENSG00000198431	Neurology	Q16881	OID21135	NPC1	0.126407	0.0221167	0.0676024	Significant	0.423324	0.529477	NPX ~ NPC1 * Age_c + Sex + Error(SampleID)	39	0.45
NADK	ENSG00000008130	Cardiometabolic	O95544	OID20178	NPC1	0.130355	0.0222473	0.067929	Significant	-1.53453	-1.26121	NPX ~ NPC1 * Age_c + Sex + Error(SampleID)	39	2.55
APLP1	ENSG00000105290	Cardiometabolic	P51693	OID20164	Age_c	0.192968	0.00406021	0.0679313	Significant	0.588352	-0.0626301	NPX ~ NPC1 * Age_c + Sex + Error(SampleID)		0.48
ICAM1	ENSG00000090339	Cardiometabolic	P05362	OID20411	Age_c	0.193069	0.00404943	0.0679313	Significant	0.477372	-0.0294658	NPX ~ NPC1 * Age_c + Sex + Error(SampleID)		0.11
IGSF9	ENSG00000085552	Cardiometabolic_II	Q9P2J2	OID30330	NPC1	0.132199	0.0223365	0.0681288	Significant	-0.555714	-0.649319	NPX ~ NPC1 * Age_c + Sex + Error(SampleID)	38	0.64
PTPRZ1	ENSG00000106278	Cardiometabolic_II	P23471	OID30343	NPC1	0.118818	0.0224791	0.0684905	Significant	0.142245	0.531297	NPX ~ NPC1 * Age_c + Sex + Error(SampleID)	38	0.43
SYT1	ENSG00000067715	Neurology_II	P21579	OID31089	Age_c	0.192306	0.00413142	0.0687209	Significant	1.03848	-0.0667226	NPX ~ NPC1 * Age_c + Sex + Error(SampleID)		0.55
TOP2B	ENSG00000077097	Inflammation_II	Q02880	OID30559	NPC1	0.129146	0.0226147	0.0688305	Significant	-1.38163	-1.23692	NPX ~ NPC1 * Age_c + Sex + Error(SampleID)	39	2.47
USP47	ENSG00000170242	Cardiometabolic_II	Q96K76	OID30119	NPC1	0.12908	0.0226429	0.0688429	Significant	-1.44467	-1.20806	NPX ~ NPC1 * Age_c + Sex + Error(SampleID)	39	2.36
JUN	ENSG00000177606	Inflammation	P05412	OID20424	NPC1	0.136016	0.0227043	0.0689223	Significant	-1.00373	-1.11498	NPX ~ NPC1 * Age_c + Sex + Error(SampleID)	36	1.63
RNASET2	ENSG00000026297	Cardiometabolic	O00584	OID20321	NPC1	0.127667	0.0227171	0.0689223	Significant	-0.288968	-0.275485	NPX ~ NPC1 * Age_c + Sex + Error(SampleID)	39	0.12
IL5RA	ENSG00000091181	Inflammation	Q01344	OID20601	Age_c	0.201152	0.00418858	0.0692689	Significant	0.214887	0.0644802	NPX ~ NPC1 * Age_c + Sex + Error(SampleID)		0.51
LHPP	ENSG00000107902	Inflammation	Q9H008	OID20749	NPC1	0.126946	0.0228602	0.0692828	Significant	0.950738	0.94733	NPX ~ NPC1 * Age_c + Sex + Error(SampleID)	39	1.46
GBP2	ENSG00000162645	Inflammation	P32456	OID20489	NPC1	0.135609	0.0229211	0.0693205	Significant	0.91077	1.06433	NPX ~ NPC1 * Age_c + Sex + Error(SampleID)	36	1.49
BCAT1	ENSG00000060982	Cardiometabolic_II	P54687	OID30312	NPC1	0.124508	0.0229131	0.0693205	Significant	0.385438	0.570216	NPX ~ NPC1 * Age_c + Sex + Error(SampleID)	38	0.50
DOK1	ENSG00000115325	Neurology_II	Q99704	OID31111	NPC1	0.128516	0.0230116	0.0694731	Significant	-1.51856	-1.30886	NPX ~ NPC1 * Age_c + Sex + Error(SampleID)	39	2.78
CFI	ENSG00000205403	Inflammation_II	P05156	OID30772	NPC1	0.12616	0.0230201	0.0694731	Significant	-0.133895	-0.1486	NPX ~ NPC1 * Age_c + Sex + Error(SampleID)	39	0.04
CD2AP	ENSG00000198087	Cardiometabolic	Q9Y5K6	OID20177	NPC1	0.126073	0.0230844	0.0695204	Significant	1.09432	1.05773	NPX ~ NPC1 * Age_c + Sex + Error(SampleID)	39	1.82
ARHGAP25	ENSG00000163219	Oncology	P42331	OID21255	NPC1	0.135019	0.0230661	0.0695204	Significant	-1.12984	-0.988952	NPX ~ NPC1 * Age_c + Sex + Error(SampleID)	36	1.48
NEDD9	ENSG00000111859	Inflammation_II	Q14511	OID30503	NPC1	0.127919	0.0231514	0.0696489	Significant	-0.95155	-0.856617	NPX ~ NPC1 * Age_c + Sex + Error(SampleID)	39	1.20
COCH	ENSG00000100473	Cardiometabolic_II	O43405	OID30305	NPC1	0.13787	0.0232491	0.0698694	Significant	-0.442226	-0.417233	NPX ~ NPC1 * Age_c + Sex + Error(SampleID)	38	0.27
SPRED2	ENSG00000198369	Inflammation_II	Q7Z698	OID30423	NPC1	0.126712	0.0235791	0.0707868	Significant	-0.409596	-0.355585	NPX ~ NPC1 * Age_c + Sex + Error(SampleID)	39	0.21
FAP	ENSG00000078098	Cardiometabolic	Q12884	OID20330	NPC1	0.128684	0.0236736	0.0709959	Significant	-0.613218	-0.378247	NPX ~ NPC1 * Age_c + Sex + Error(SampleID)	39	0.23
ITGAL	ENSG00000005844	Inflammation_II	P20701	OID30537	NPC1	0.126232	0.0237486	0.0711464	Significant	1.21342	1.20319	NPX ~ NPC1 * Age_c + Sex + Error(SampleID)	39	2.38
IL33	ENSG00000137033	Inflammation	O95760	OID20428	NPC1	0.134057	0.0237826	0.0711736	Significant	0.767714	0.770294	NPX ~ NPC1 * Age_c + Sex + Error(SampleID)	36	0.79
SPINT1	ENSG00000166145	Neurology	O43278	OID21109	NPC1	0.123026	0.0242983	0.0726409	Significant	0.169717	0.222015	NPX ~ NPC1 * Age_c + Sex + Error(SampleID)	39	0.08
NIT1	ENSG00000158793	Cardiometabolic_II	Q86X76	OID30252	NPC1	0.126342	0.0243354	0.0726761	Significant	0.61764	0.738345	NPX ~ NPC1 * Age_c + Sex + Error(SampleID)	38	0.86
ABRAXAS2	ENSG00000165660	Cardiometabolic_II	Q15018	OID30130	NPC1	0.124576	0.0245007	0.0730932	Significant	-1.1246	-1.24455	NPX ~ NPC1 * Age_c + Sex + Error(SampleID)	39	2.58
POLR2F	ENSG00000100142	Oncology	P61218	OID21283	NPC1	0.130287	0.0245307	0.0731065	Significant	-0.712112	-0.64438	NPX ~ NPC1 * Age_c + Sex + Error(SampleID)	37	0.66
SPINT3	ENSG00000101446	Oncology_II	P49223	OID31509	NPC1:Age_c	0.255809	0.000742502	0.0732516	Significant	0.662053	-0.249964	NPX ~ NPC1 * Age_c + Sex + Error(SampleID)		5.37
PM20D1	ENSG00000162877	Cardiometabolic	Q6GTS8	OID20149	NPC1:Age_c	0.270465	0.000491924	0.0732516	Significant	-0.730499	-0.243855	NPX ~ NPC1 * Age_c + Sex + Error(SampleID)		4.74
TOP1	ENSG00000198900	Oncology_II	P11387	OID31449	NPC1:Age_c	0.264068	0.000589228	0.0732516	Significant	-0.392927	-0.170081	NPX ~ NPC1 * Age_c + Sex + Error(SampleID)		2.38
SHBG	ENSG00000129214	Inflammation_II	P04278	OID30685	NPC1:Age_c	0.271244	0.000481187	0.0732516	Significant	0.575288	0.0955797	NPX ~ NPC1 * Age_c + Sex + Error(SampleID)		0.73
IGFBP2	ENSG00000115457	Cardiometabolic	P18065	OID20325	NPC1:Age_c	0.258821	0.000682629	0.0732516	Significant	0.459987	0.0760259	NPX ~ NPC1 * Age_c + Sex + Error(SampleID)		0.49
SNAP25	ENSG00000132639	Neurology_II	P60880	OID30811	NPC1:Age_c	0.269287	0.000601863	0.0732516	Significant	-0.00686689	0.0697846	NPX ~ NPC1 * Age_c + Sex + Error(SampleID)		0.39
SLITRK1	ENSG00000178235	Inflammation_II	Q96PX8	OID30510	NPC1:Age_c	0.255979	0.000738991	0.0732516	Significant	0.325596	0.0666067	NPX ~ NPC1 * Age_c + Sex + Error(SampleID)		0.38
RTBDN	ENSG00000132026	Oncology	Q9BSG5	OID21343	NPC1:Age_c	0.272306	0.000656793	0.0732516	Significant	0.534095	0.0587119	NPX ~ NPC1 * Age_c + Sex + Error(SampleID)		0.29
LEPR	ENSG00000116678	Cardiometabolic	P48357	OID20128	NPC1:Age_c	0.256296	0.000732492	0.0732516	Significant	0.244946	0.056611	NPX ~ NPC1 * Age_c + Sex + Error(SampleID)		0.27
MEGF11	ENSG00000157890	Cardiometabolic_II	A6BM72	OID30099	NPC1:Age_c	0.267978	0.000527754	0.0732516	Significant	0.199135	0.0468673	NPX ~ NPC1 * Age_c + Sex + Error(SampleID)		0.18
MOG	ENSG00000204655	Oncology	Q16653	OID21384	NPC1:Age_c	0.273442	0.000536534	0.0732516	Significant	0.470094	0.045121	NPX ~ NPC1 * Age_c + Sex + Error(SampleID)		0.16
CTSV	ENSG00000136943	Oncology	O60911	OID21405	NPC1:Age_c	0.266142	0.000656332	0.0732516	Significant	-0.202481	-0.0365263	NPX ~ NPC1 * Age_c + Sex + Error(SampleID)		0.11
TTR	ENSG00000118271	Inflammation_II	P02766	OID30782	NPC1:Age_c	0.256128	0.000735932	0.0732516	Significant	-0.0679267	-0.0283281	NPX ~ NPC1 * Age_c + Sex + Error(SampleID)		0.07
LDLR	ENSG00000130164	Cardiometabolic	P01130	OID20240	NPC1	0.12356	0.0246201	0.0732967	Significant	0.41199	0.468465	NPX ~ NPC1 * Age_c + Sex + Error(SampleID)	39	0.37
ACHE	ENSG00000087085	Inflammation_II	P22303	OID30585	NPC1:Age_c	0.254547	0.000769079	0.0733445	Significant	-0.158972	0.0354667	NPX ~ NPC1 * Age_c + Sex + Error(SampleID)		0.11
SERPINF1	ENSG00000132386	Inflammation_II	P36955	OID30757	NPC1	0.119757	0.024797	0.0737465	Significant	-0.0699775	-0.14324	NPX ~ NPC1 * Age_c + Sex + Error(SampleID)	39	0.03
TFF2	ENSG00000160181	Inflammation	Q03403	OID20787	Sex	0.274423	0.000439654	0.0739911	Significant	0.403632	-0.249215	NPX ~ NPC1 * Age_c + Sex + Error(SampleID)		0.18
TGOLN2	ENSG00000152291	Inflammation_II	O43493	OID30691	NPC1	0.123223	0.024955	0.0741327	Significant	0.255652	0.241203	NPX ~ NPC1 * Age_c + Sex + Error(SampleID)	39	0.10
PODXL	ENSG00000128567	Oncology	O00592	OID21358	NPC1	0.128585	0.0249787	0.0741327	Significant	0.0822355	0.110215	NPX ~ NPC1 * Age_c + Sex + Error(SampleID)	37	0.02
TRIM24	ENSG00000122779	Oncology_II	O15164	OID31271	NPC1	0.131405	0.0250295	0.0742066	Significant	-0.893351	-1.21147	NPX ~ NPC1 * Age_c + Sex + Error(SampleID)	37	2.38
SMPD3	ENSG00000103056	Inflammation_II	Q9NY59	OID30477	Age_c	0.18891	0.00451658	0.074264	Significant	-0.599767	-0.098089	NPX ~ NPC1 * Age_c + Sex + Error(SampleID)		1.22
ADAM15	ENSG00000143537	Cardiometabolic	Q13444	OID20109	Age_c	0.225243	0.00456877	0.0746929	Significant	0.234987	-0.0384446	NPX ~ NPC1 * Age_c + Sex + Error(SampleID)		0.12
ORM1	ENSG00000229314	Inflammation_II	P02763	OID30768	NPC1	0.123645	0.0252484	0.0747781	Significant	-0.35096	-0.348872	NPX ~ NPC1 * Age_c + Sex + Error(SampleID)	39	0.20
TNNI3	ENSG00000129991	Cardiometabolic	P19429	OID20050	Age_c	0.224171	0.00467998	0.0751855	Significant	0.876601	0.245752	NPX ~ NPC1 * Age_c + Sex + Error(SampleID)		5.12
CNTN5	ENSG00000149972	Neurology	O94779	OID21006	Age_c	0.187756	0.00465524	0.0751855	Significant	0.180812	-0.0577945	NPX ~ NPC1 * Age_c + Sex + Error(SampleID)		0.43
CD63	ENSG00000135404	Neurology	P08962	OID20988	Age_c	0.191621	0.0047303	0.0751855	Significant	0.74	-0.0519688	NPX ~ NPC1 * Age_c + Sex + Error(SampleID)		0.34
FCRL1	ENSG00000163534	Cardiometabolic	Q96LA6	OID20172	Age_c	0.187595	0.00467492	0.0751855	Significant	0.681102	-0.0443964	NPX ~ NPC1 * Age_c + Sex + Error(SampleID)		0.25
ITIH3	ENSG00000162267	Cardiometabolic	Q06033	OID20352	Age_c	0.187321	0.00470857	0.0751855	Significant	0.392279	-0.041388	NPX ~ NPC1 * Age_c + Sex + Error(SampleID)		0.22
TMED8	ENSG00000100580	Oncology_II	Q6PL24	OID31462	NPC1	0.124689	0.0254552	0.0753127	Significant	-1.1061	-0.954172	NPX ~ NPC1 * Age_c + Sex + Error(SampleID)	39	1.54
IL16	ENSG00000172349	Inflammation	Q14005	OID20633	NPC1	0.127476	0.0254904	0.075339	Significant	-0.458024	-0.47375	NPX ~ NPC1 * Age_c + Sex + Error(SampleID)	37	0.37
FST	ENSG00000134363	Inflammation	P19883	OID20770	NPC1	0.122926	0.0255908	0.0755575	Significant	0.386421	0.387171	NPX ~ NPC1 * Age_c + Sex + Error(SampleID)	39	0.25
SLC9A3R2		Oncology_II	Q15599	OID31445	NPC1	0.120985	0.0256226	0.0755736	Significant	0.339115	0.405028	NPX ~ NPC1 * Age_c + Sex + Error(SampleID)	39	0.28
ENPP2	ENSG00000136960	Cardiometabolic	Q13822	OID20288	NPC1:Age_c	0.252176	0.000821469	0.0758136	Significant	0.106371	0.0335499	NPX ~ NPC1 * Age_c + Sex + Error(SampleID)		0.10
TLR1	ENSG00000174125	Inflammation_II	Q15399	OID30532	NPC1	0.121752	0.0257498	0.0758704	Significant	0.442084	0.526701	NPX ~ NPC1 * Age_c + Sex + Error(SampleID)	39	0.47
OLR1	ENSG00000173391	Cardiometabolic	P78380	OID20183	NPC1	0.124185	0.0257983	0.0759351	Significant	-1.15522	-1.01876	NPX ~ NPC1 * Age_c + Sex + Error(SampleID)	39	1.76
OGN	ENSG00000106809	Neurology	P20774	OID21123	NPC1	0.122755	0.0259584	0.076328	Significant	0.627775	0.54391	NPX ~ NPC1 * Age_c + Sex + Error(SampleID)	39	0.50
MICB_MICA		Inflammation	Q29980_Q29983	OID20593	NPC1	0.111868	0.0260944	0.0766489	Significant	1.42896	1.37668	NPX ~ NPC1 * Age_c + Sex + Error(SampleID)	37	3.38
KIF20B	ENSG00000138182	Neurology_II	Q96Q89	OID30816	NPC1	0.130154	0.0261311	0.076678	Significant	0.999943	0.905634	NPX ~ NPC1 * Age_c + Sex + Error(SampleID)	38	1.37
LGALS8	ENSG00000116977	Neurology	O00214	OID21041	NPC1	0.123762	0.0262127	0.0768386	Significant	-0.763066	-0.584928	NPX ~ NPC1 * Age_c + Sex + Error(SampleID)	39	0.58
GJA8	ENSG00000121634	Oncology_II	P48165	OID31187	NPC1	0.119464	0.0262746	0.0768625	Significant	1.03666	1.32647	NPX ~ NPC1 * Age_c + Sex + Error(SampleID)	39	3.00
TFF3	ENSG00000160180	Cardiometabolic	Q07654	OID20371	NPC1	0.118893	0.0262635	0.0768625	Significant	0.187803	0.215129	NPX ~ NPC1 * Age_c + Sex + Error(SampleID)	39	0.08
SV2A	ENSG00000159164	Neurology_II	Q7L0J3	OID30965	NPC1:Age_c	0.269638	0.000990266	0.0769397	Significant	-2.66175	0.185601	NPX ~ NPC1 * Age_c + Sex + Error(SampleID)		2.82
LEP	ENSG00000174697	Cardiometabolic	P41159	OID20187	NPC1:Age_c	0.245248	0.000995026	0.0769397	Significant	-0.259158	-0.134333	NPX ~ NPC1 * Age_c + Sex + Error(SampleID)		1.64
MATN3	ENSG00000132031	Neurology	O15232	OID20979	NPC1:Age_c	0.253588	0.000924758	0.0769397	Significant	-0.170229	0.107492	NPX ~ NPC1 * Age_c + Sex + Error(SampleID)		1.03
PTPRR	ENSG00000153233	Neurology_II	Q15256	OID31099	NPC1:Age_c	0.247368	0.000938489	0.0769397	Significant	0.628973	0.06846	NPX ~ NPC1 * Age_c + Sex + Error(SampleID)		0.42
PTPRN2	ENSG00000155093	Neurology	Q92932	OID20912	NPC1:Age_c	0.251377	0.000981867	0.0769397	Significant	0.664703	0.05813	NPX ~ NPC1 * Age_c + Sex + Error(SampleID)		0.31
ITGB1	ENSG00000150093	Cardiometabolic	P05556	OID20376	NPC1:Age_c	0.25003	0.000871855	0.0769397	Significant	-0.169643	0.0290168	NPX ~ NPC1 * Age_c + Sex + Error(SampleID)		0.07
ERVV-1	ENSG00000269526	Cardiometabolic_II	B6SEH8	OID30094	NPC1	0.120232	0.0263755	0.0770789	Significant	0.712684	0.794049	NPX ~ NPC1 * Age_c + Sex + Error(SampleID)	39	1.08
SART1	ENSG00000175467	Cardiometabolic_II	O43290	OID30113	NPC1	0.122778	0.0266124	0.077692	Significant	-1.36781	-1.14496	NPX ~ NPC1 * Age_c + Sex + Error(SampleID)	39	2.25
ENDOU	ENSG00000111405	Oncology_II	P21128	OID31498	NPC1	0.116481	0.0266721	0.0777869	Significant	-0.178595	-0.324281	NPX ~ NPC1 * Age_c + Sex + Error(SampleID)	39	0.18
COMT	ENSG00000093010	Cardiometabolic	P21964	OID20086	NPC1	0.118205	0.0267051	0.0777992	Significant	-1.25386	-1.1517	NPX ~ NPC1 * Age_c + Sex + Error(SampleID)	32	1.99
MINK1	ENSG00000141503	Neurology_II	Q8N4C8	OID31156	NPC1	0.119116	0.0267307	0.0777992	Significant	0.662579	0.779691	NPX ~ NPC1 * Age_c + Sex + Error(SampleID)	39	1.04
KLK14	ENSG00000129437	Oncology	Q9P0G3	OID21407	NPC1	0.125982	0.0268219	0.0779853	Significant	0.338995	0.395117	NPX ~ NPC1 * Age_c + Sex + Error(SampleID)	38	0.27
NBN	ENSG00000104320	Inflammation	O60934	OID20442	NPC1	0.128878	0.0268939	0.0780359	Significant	-1.43928	-1.26368	NPX ~ NPC1 * Age_c + Sex + Error(SampleID)	36	2.22
AKR1B1	ENSG00000085662	Oncology	P15121	OID21244	NPC1	0.128894	0.0268708	0.0780359	Significant	0.791634	0.897629	NPX ~ NPC1 * Age_c + Sex + Error(SampleID)	36	1.29
ANXA5	ENSG00000164111	Neurology	P08758	OID20810	NPC1	0.131455	0.0270954	0.0785088	Significant	0.446259	0.515379	NPX ~ NPC1 * Age_c + Sex + Error(SampleID)	35	0.39
SELL	ENSG00000188404	Inflammation_II	P14151	OID30752	NPC1	0.119371	0.0271118	0.0785088	Significant	0.211051	0.310116	NPX ~ NPC1 * Age_c + Sex + Error(SampleID)	39	0.17
FBN2	ENSG00000138829	Neurology_II	P35556	OID30974	Age_c	0.204281	0.00498029	0.0787216	Significant	0.551943	-0.0753912	NPX ~ NPC1 * Age_c + Sex + Error(SampleID)		0.67
DMP1	ENSG00000152592	Cardiometabolic_II	Q13316	OID30213	Age_c	0.189301	0.00501998	0.0789129	Significant	-0.1295	-0.0690397	NPX ~ NPC1 * Age_c + Sex + Error(SampleID)		0.58
CASP4	ENSG00000196954	Oncology_II	P49662	OID31276	NPC1	0.116927	0.0273831	0.0791591	Significant	1.99846	1.89085	NPX ~ NPC1 * Age_c + Sex + Error(SampleID)	37	6.00
STX7	ENSG00000079950	Inflammation_II	O15400	OID30560	NPC1	0.121694	0.0273963	0.0791591	Significant	-1.17329	-0.923904	NPX ~ NPC1 * Age_c + Sex + Error(SampleID)	39	1.48
WIF1	ENSG00000156076	Oncology	Q9Y5W5	OID21464	NPC1	0.115644	0.0274193	0.0791591	Significant	-0.447481	-0.359733	NPX ~ NPC1 * Age_c + Sex + Error(SampleID)	38	0.23
BIRC2	ENSG00000110330	Oncology	Q13490	OID21217	NPC1	0.127309	0.0276952	0.0797946	Significant	-0.580156	-0.479508	NPX ~ NPC1 * Age_c + Sex + Error(SampleID)	36	0.37
GGT5	ENSG00000099998	Neurology	P36269	OID20909	NPC1	0.122243	0.027695	0.0797946	Significant	0.189758	0.218214	NPX ~ NPC1 * Age_c + Sex + Error(SampleID)	38	0.08
S100A12	ENSG00000163221	Oncology	P80511	OID21374	NPC1	0.125094	0.0278311	0.0801054	Significant	-1.18822	-1.06149	NPX ~ NPC1 * Age_c + Sex + Error(SampleID)	37	1.87
DUSP13		Oncology_II	Q6B8I1	OID31394	NPC1	0.117909	0.0278893	0.0801118	Significant	-0.503303	-0.707545	NPX ~ NPC1 * Age_c + Sex + Error(SampleID)	39	0.87
BRDT	ENSG00000137948	Cardiometabolic_II	Q58F21	OID30179	NPC1	0.117481	0.0278676	0.0801118	Significant	0.457173	0.530232	NPX ~ NPC1 * Age_c + Sex + Error(SampleID)	39	0.49
HRC	ENSG00000130528	Cardiometabolic_II	P23327	OID30211	NPC1	0.120755	0.0279959	0.0803374	Significant	-0.232224	-0.336531	NPX ~ NPC1 * Age_c + Sex + Error(SampleID)	38	0.19
SBSN	ENSG00000189001	Cardiometabolic_II	Q6UWP8	OID30398	NPC1	0.116713	0.0283173	0.0811781	Significant	-0.202822	-0.307911	NPX ~ NPC1 * Age_c + Sex + Error(SampleID)	39	0.17
STX6	ENSG00000135823	Oncology	O43752	OID21219	NPC1	0.126311	0.0283607	0.0812212	Significant	-1.18259	-1.13278	NPX ~ NPC1 * Age_c + Sex + Error(SampleID)	36	2.10
C7	ENSG00000112936	Inflammation_II	P10643	OID30766	NPC1	0.117565	0.0286189	0.0818787	Significant	0.322897	0.365229	NPX ~ NPC1 * Age_c + Sex + Error(SampleID)	39	0.24
CRYBB1	ENSG00000100122	Cardiometabolic_II	P53674	OID30319	NPC1	0.130793	0.0287134	0.0820643	Significant	-0.826129	-0.699266	NPX ~ NPC1 * Age_c + Sex + Error(SampleID)	38	0.82
NOTCH3	ENSG00000074181	Cardiometabolic	Q9UM47	OID20253	NPC1	0.11645	0.0287411	0.0820643	Significant	0.301124	0.337135	NPX ~ NPC1 * Age_c + Sex + Error(SampleID)	39	0.20
FGF2	ENSG00000138685	Inflammation	P09038	OID20503	NPC1	0.0816457	0.028877	0.0822878	Significant	-0.692182	-0.5584	NPX ~ NPC1 * Age_c + Sex + Error(SampleID)	37	0.58
ADAM15	ENSG00000143537	Cardiometabolic	Q13444	OID20109	NPC1	0.155434	0.0288539	0.0822878	Significant	0.234987	0.283705	NPX ~ NPC1 * Age_c + Sex + Error(SampleID)	32	0.12
CDH6	ENSG00000113361	Cardiometabolic	P55285	OID20157	NPC1	0.116642	0.0291528	0.0829912	Significant	0.262889	0.341008	NPX ~ NPC1 * Age_c + Sex + Error(SampleID)	39	0.21
PZP	ENSG00000126838	Inflammation_II	P20742	OID30730	NPC1	0.116401	0.0293887	0.0835796	Significant	0.969717	0.885769	NPX ~ NPC1 * Age_c + Sex + Error(SampleID)	39	1.40
CHP1	ENSG00000187446	Neurology_II	Q99653	OID30869	Age_c	0.186833	0.00534705	0.0835951	Significant	0.623857	-0.182143	NPX ~ NPC1 * Age_c + Sex + Error(SampleID)		4.21
PVALB	ENSG00000100362	Oncology	P20472	OID21420	NPC1	0.110867	0.0294363	0.0836318	Significant	-1.46562	-1.21649	NPX ~ NPC1 * Age_c + Sex + Error(SampleID)	38	2.66
CRADD	ENSG00000169372	Neurology	P78560	OID20923	NPC1	0.11115	0.0295638	0.0838886	Significant	-1.615	-1.42677	NPX ~ NPC1 * Age_c + Sex + Error(SampleID)	38	3.67
CA12	ENSG00000074410	Oncology	O43570	OID21344	NPC1	0.120905	0.0295853	0.0838886	Significant	-0.0983282	-0.31228	NPX ~ NPC1 * Age_c + Sex + Error(SampleID)	37	0.17
LILRA4	ENSG00000239961	Cardiometabolic_II	P59901	OID30162	NPC1	0.115877	0.0300135	0.0850184	Significant	0.70925	0.682533	NPX ~ NPC1 * Age_c + Sex + Error(SampleID)	39	0.84
AHSA1	ENSG00000100591	Oncology_II	O95433	OID31379	NPC1	0.115451	0.0300718	0.0850993	Significant	0.85979	0.897624	NPX ~ NPC1 * Age_c + Sex + Error(SampleID)	39	1.45
SMNDC1	ENSG00000119953	Oncology_II	O75940	OID31471	NPC1	0.117613	0.030205	0.0853075	Significant	-1.30435	-1.1111	NPX ~ NPC1 * Age_c + Sex + Error(SampleID)	39	2.22
ZBP1	ENSG00000124256	Inflammation_II	Q9H171	OID30526	NPC1	0.11824	0.0301959	0.0853075	Significant	-1.18855	-0.973481	NPX ~ NPC1 * Age_c + Sex + Error(SampleID)	39	1.70
NECTIN1	ENSG00000110400	Inflammation_II	Q15223	OID30545	NPC1	0.11622	0.0302369	0.0853134	Significant	0.338048	0.346712	NPX ~ NPC1 * Age_c + Sex + Error(SampleID)	39	0.22
SNCG	ENSG00000173267	Neurology	O76070	OID20971	Sex	0.271216	0.000570647	0.0855113	Significant	0.650387	-0.476998	NPX ~ NPC1 * Age_c + Sex + Error(SampleID)		0.65
CHGB	ENSG00000089199	Neurology	P05060	OID21038	Sex	0.263711	0.000595179	0.0855113	Significant	0.467672	-0.39777	NPX ~ NPC1 * Age_c + Sex + Error(SampleID)		0.47
SEZ6L2	ENSG00000174938	Oncology	Q6UXD5	OID21289	Sex	0.275787	0.000597772	0.0855113	Significant	0.149486	-0.205179	NPX ~ NPC1 * Age_c + Sex + Error(SampleID)		0.12
ACRBP	ENSG00000111644	Oncology_II	Q8NEB7	OID31385	NPC1	0.114265	0.0307777	0.0867253	Significant	0.351895	0.367299	NPX ~ NPC1 * Age_c + Sex + Error(SampleID)	39	0.24
COL15A1	ENSG00000204291	Cardiometabolic_II	P39059	OID30396	NPC1	0.114831	0.0307979	0.0867253	Significant	-0.25012	-0.247431	NPX ~ NPC1 * Age_c + Sex + Error(SampleID)	39	0.11
ADCYAP1R1	ENSG00000078549	Oncology	P41586	OID21188	NPC1	0.12262	0.0311189	0.087543	Significant	0.458087	0.456814	NPX ~ NPC1 * Age_c + Sex + Error(SampleID)	36	0.35
DDI2	ENSG00000197312	Inflammation_II	Q5TDH0	OID30602	NPC1	0.114389	0.031152	0.0875499	Significant	1.14923	1.1112	NPX ~ NPC1 * Age_c + Sex + Error(SampleID)	39	2.25
CHRM1	ENSG00000168539	Neurology_II	P11229	OID30930	NPC1	0.127826	0.0312837	0.0878339	Significant	0.633309	0.858579	NPX ~ NPC1 * Age_c + Sex + Error(SampleID)	35	1.19
PTPRC	ENSG00000081237	Cardiometabolic_II	P08575	OID30380	Age_c	0.18034	0.00565019	0.0878543	Significant	0.576618	-0.0307992	NPX ~ NPC1 * Age_c + Sex + Error(SampleID)		0.13
MNDA	ENSG00000163563	Cardiometabolic	P41218	OID20156	NPC1	0.116415	0.0313644	0.087974	Significant	-1.83186	-1.51686	NPX ~ NPC1 * Age_c + Sex + Error(SampleID)	39	4.20
APOA1	ENSG00000118137	Inflammation_II	P02647	OID30769	NPC1	0.114942	0.0314847	0.0882251	Significant	-0.4363	-0.377797	NPX ~ NPC1 * Age_c + Sex + Error(SampleID)	39	0.26
MIA	ENSG00000261857	Oncology	Q16674	OID21531	NPC1	0.110526	0.0317667	0.0889281	Significant	0.108664	0.359421	NPX ~ NPC1 * Age_c + Sex + Error(SampleID)	39	0.24
EPHB6	ENSG00000106123	Neurology	O15197	OID20982	Age_c	0.183555	0.00581345	0.089431	Significant	0.330188	-0.037139	NPX ~ NPC1 * Age_c + Sex + Error(SampleID)		0.19
LTA	ENSG00000226979	Inflammation	P01374	OID20586	Age_c	0.188071	0.00581411	0.089431	Significant	0.18579	-0.0292463	NPX ~ NPC1 * Age_c + Sex + Error(SampleID)		0.11
DIPK2B	ENSG00000147113	Inflammation_II	Q9H7Y0	OID30582	NPC1	0.113934	0.0319972	0.0894857	Significant	-0.249227	-0.252981	NPX ~ NPC1 * Age_c + Sex + Error(SampleID)	39	0.12
OLFM4	ENSG00000102837	Inflammation_II	Q6UX06	OID30665	NPC1	0.113697	0.0321044	0.089698	Significant	-1.30741	-1.27092	NPX ~ NPC1 * Age_c + Sex + Error(SampleID)	39	2.98
FSHB	ENSG00000131808	Cardiometabolic_II	P01225	OID30233	NPC1	0.114231	0.0321794	0.0898197	Significant	0.639233	0.50668	NPX ~ NPC1 * Age_c + Sex + Error(SampleID)	38	0.45
LRIG3	ENSG00000139263	Inflammation_II	Q6UXM1	OID30450	NPC1	0.114578	0.0322909	0.0900431	Significant	0.245817	0.219527	NPX ~ NPC1 * Age_c + Sex + Error(SampleID)	39	0.09
KLK6	ENSG00000167755	Oncology	Q92876	OID21526	NPC1	0.111866	0.0325902	0.0907893	Significant	0.256911	0.265024	NPX ~ NPC1 * Age_c + Sex + Error(SampleID)	39	0.13
AFP	ENSG00000081051	Neurology	P02771	OID20978	NPC1	0.109554	0.0326497	0.0908665	Significant	1.05445	1.03369	NPX ~ NPC1 * Age_c + Sex + Error(SampleID)	38	2.00
MSLN	ENSG00000102854	Oncology	Q13421	OID21380	NPC1	0.117286	0.0328026	0.0912033	Significant	0.536074	0.473827	NPX ~ NPC1 * Age_c + Sex + Error(SampleID)	37	0.40
IL9	ENSG00000145839	Oncology_II	P15248	OID31298	NPC1	0.11661	0.0331747	0.0921485	Significant	0.830597	0.857857	NPX ~ NPC1 * Age_c + Sex + Error(SampleID)	37	1.33
CTBS	ENSG00000117151	Inflammation_II	Q01459	OID30710	NPC1:Age_c	0.237613	0.00122712	0.0923895	Significant	-0.0491133	-0.0211979	NPX ~ NPC1 * Age_c + Sex + Error(SampleID)		0.04
CLIC5	ENSG00000112782	Neurology_II	Q9NZA1	OID30890	NPC1	0.119847	0.0333382	0.092423	Significant	0.484323	0.543753	NPX ~ NPC1 * Age_c + Sex + Error(SampleID)	35	0.49
IL6R	ENSG00000160712	Cardiometabolic	P08887	OID20385	NPC1	0.112074	0.0333108	0.092423	Significant	0.290094	0.304748	NPX ~ NPC1 * Age_c + Sex + Error(SampleID)	39	0.17
TNXB	ENSG00000168477	Neurology	P22105	OID21107	Age_c	0.17765	0.00605994	0.0927138	Significant	-0.2856	-0.030294	NPX ~ NPC1 * Age_c + Sex + Error(SampleID)		0.13
SUGP1	ENSG00000105705	Oncology_II	Q8IWZ8	OID31524	NPC1	0.113536	0.0335356	0.0928802	Significant	-0.956962	-0.753595	NPX ~ NPC1 * Age_c + Sex + Error(SampleID)	39	1.06
GRP	ENSG00000134443	Cardiometabolic_II	P07492	OID30264	NPC1	0.11283	0.033791	0.0934779	Significant	0.653991	1.06559	NPX ~ NPC1 * Age_c + Sex + Error(SampleID)	38	2.03
CD99L2	ENSG00000102181	Neurology	Q8TCZ2	OID21122	NPC1	0.112678	0.0338167	0.0934779	Significant	-0.225323	-0.19476	NPX ~ NPC1 * Age_c + Sex + Error(SampleID)	39	0.07
VPS53	ENSG00000141252	Oncology	Q5VIR6	OID21281	NPC1	0.116946	0.0338854	0.0935773	Significant	-0.55036	-0.455499	NPX ~ NPC1 * Age_c + Sex + Error(SampleID)	37	0.37
GP1BA	ENSG00000185245	Cardiometabolic	P07359	OID20381	NPC1	0.113092	0.0339951	0.0937897	Significant	-0.4234	-0.35008	NPX ~ NPC1 * Age_c + Sex + Error(SampleID)	39	0.23
CHP1	ENSG00000187446	Neurology_II	Q99653	OID30869	NPC1	0.103655	0.034211	0.0942944	Significant	0.623857	1.50972	NPX ~ NPC1 * Age_c + Sex + Error(SampleID)	38	4.21
RASGRF1	ENSG00000058335	Oncology_II	Q13972	OID31213	NPC1	0.111164	0.0346761	0.0954844	Significant	0.949871	0.892267	NPX ~ NPC1 * Age_c + Sex + Error(SampleID)	39	1.51
CCDC28A	ENSG00000024862	Neurology_II	Q8IWP9	OID30973	NPC1	0.125589	0.0347568	0.095573	Significant	0.301558	0.444855	NPX ~ NPC1 * Age_c + Sex + Error(SampleID)	35	0.33
CNTN4	ENSG00000144619	Neurology	Q8IWV2	OID21117	NPC1	0.107063	0.0347751	0.095573	Significant	0.0994725	0.21805	NPX ~ NPC1 * Age_c + Sex + Error(SampleID)	39	0.09
IRAK1	ENSG00000184216	Inflammation	P51617	OID20485	NPC1	0.117769	0.034955	0.0958832	Significant	-1.45227	-1.14848	NPX ~ NPC1 * Age_c + Sex + Error(SampleID)	36	2.04
DNPH1	ENSG00000112667	Inflammation	O43598	OID20744	NPC1	0.10941	0.0349525	0.0958832	Significant	0.809304	0.855526	NPX ~ NPC1 * Age_c + Sex + Error(SampleID)	39	1.40
GRN	ENSG00000030582	Neurology	P28799	OID21159	NPC1	0.107416	0.0350532	0.0960607	Significant	0.125878	0.211604	NPX ~ NPC1 * Age_c + Sex + Error(SampleID)	39	0.09
IL3RA	ENSG00000185291	Inflammation	P26951	OID20461	NPC1	0.117433	0.0351984	0.0963662	Significant	0.320061	0.440495	NPX ~ NPC1 * Age_c + Sex + Error(SampleID)	36	0.30
GET3	ENSG00000198356	Cardiometabolic_II	O43681	OID30303	NPC1	0.120388	0.0354285	0.0969035	Significant	0.914242	0.736063	NPX ~ NPC1 * Age_c + Sex + Error(SampleID)	38	0.99
IKBKG	ENSG00000269335	Inflammation	Q9Y6K9	OID20544	NPC1	0.0867349	0.0354824	0.0969581	Significant	-1.04124	-0.935993	NPX ~ NPC1 * Age_c + Sex + Error(SampleID)	37	1.76
CXCL10	ENSG00000169245	Inflammation	P02778	OID20697	NPC1	0.108723	0.0356889	0.0974295	Significant	0.718099	0.705266	NPX ~ NPC1 * Age_c + Sex + Error(SampleID)	39	0.96
TOP1	ENSG00000198900	Oncology_II	P11387	OID31449	NPC1	0.104432	0.0357304	0.0974497	Significant	-0.392927	-1.11277	NPX ~ NPC1 * Age_c + Sex + Error(SampleID)	39	2.38
GAL	ENSG00000069482	Inflammation	P22466	OID20727	NPC1	0.106947	0.0357857	0.0975076	Significant	-0.404873	-0.627879	NPX ~ NPC1 * Age_c + Sex + Error(SampleID)	39	0.76
FDX1	ENSG00000137714	Cardiometabolic_II	P10109	OID30078	NPC1	0.10866	0.0358838	0.0975891	Significant	1.32832	1.23375	NPX ~ NPC1 * Age_c + Sex + Error(SampleID)	39	2.93
PSMD5	ENSG00000095261	Neurology_II	Q16401	OID30918	NPC1	0.122813	0.0358594	0.0975891	Significant	0.499871	0.558889	NPX ~ NPC1 * Age_c + Sex + Error(SampleID)	35	0.53
FLT3	ENSG00000122025	Oncology	P36888	OID21272	Age_c	0.188689	0.0064297	0.0978477	Significant	0.239858	-0.0322842	NPX ~ NPC1 * Age_c + Sex + Error(SampleID)		0.12
AGR3	ENSG00000173467	Oncology	Q8TD06	OID21243	NPC1	0.116467	0.036075	0.0980157	Significant	0.581803	0.850555	NPX ~ NPC1 * Age_c + Sex + Error(SampleID)	36	1.30
SEC31A	ENSG00000138674	Cardiometabolic_II	O94979	OID30269	Age_c	0.178844	0.00655388	0.0992099	Significant	-0.470549	-0.0625497	NPX ~ NPC1 * Age_c + Sex + Error(SampleID)		0.51
FCER1A	ENSG00000179639	Neurology_II	P12319	OID30992	NPC1	0.108605	0.0365494	0.0992105	Significant	-0.28239	-0.294226	NPX ~ NPC1 * Age_c + Sex + Error(SampleID)	39	0.17
VSIG2	ENSG00000019102	Oncology_II	Q96IQ7	OID31371	Sex	0.255785	0.000743013	0.0994224	Significant	0.471073	-0.326197	NPX ~ NPC1 * Age_c + Sex + Error(SampleID)		0.33
WFDC2	ENSG00000101443	Oncology	Q14508	OID21505	Sex	0.25476	0.00076452	0.0994224	Significant	0.396224	-0.240446	NPX ~ NPC1 * Age_c + Sex + Error(SampleID)		0.18
CNTN3	ENSG00000113805	Neurology	Q9P232	OID21092	Age_c	0.174052	0.00665332	0.0996605	Significant	-0.271374	0.0403826	NPX ~ NPC1 * Age_c + Sex + Error(SampleID)		0.23
ENG	ENSG00000106991	Cardiometabolic	P17813	OID20287	Age_c	0.174185	0.0066304	0.0996605	Significant	0.124176	-0.0150262	NPX ~ NPC1 * Age_c + Sex + Error(SampleID)		0.03
SORCS2	ENSG00000184985	Oncology	Q96PQ0	OID21262	Sex	0.270888	0.00080889	0.100619	Non-significant	0.668384	-0.371887	NPX ~ NPC1 * Age_c + Sex + Error(SampleID)		0.40
SERPING1	ENSG00000149131	Inflammation_II	P05155	OID30777	NPC1	0.109639	0.0372971	0.101144	Non-significant	-0.283548	-0.225802	NPX ~ NPC1 * Age_c + Sex + Error(SampleID)	39	0.10
EHBP1	ENSG00000115504	Cardiometabolic_II	Q8NDI1	OID30302	NPC1	0.120802	0.0373422	0.101171	Non-significant	-0.864996	-0.718512	NPX ~ NPC1 * Age_c + Sex + Error(SampleID)	38	0.96
LRRC38	ENSG00000162494	Neurology_II	Q5VT99	OID30924	NPC1	0.116239	0.0374294	0.101311	Non-significant	-0.601881	-0.719464	NPX ~ NPC1 * Age_c + Sex + Error(SampleID)	35	0.90
KLF4	ENSG00000136826	Neurology_II	O43474	OID30808	NPC1	0.11904	0.0374735	0.101334	Non-significant	-1.14011	-0.917528	NPX ~ NPC1 * Age_c + Sex + Error(SampleID)	38	1.62
LAMP2	ENSG00000005893	Neurology	P13473	OID21035	Age_c	0.172862	0.00686187	0.102249	Non-significant	-0.154413	-0.0154803	NPX ~ NPC1 * Age_c + Sex + Error(SampleID)		0.03
IGF1R	ENSG00000140443	Oncology	P08069	OID21274	NPC1	0.110968	0.0379648	0.102566	Non-significant	0.209901	0.262706	NPX ~ NPC1 * Age_c + Sex + Error(SampleID)	37	0.13
GPI	ENSG00000105220	Inflammation_II	P06744	OID30680	NPC1	0.108606	0.038096	0.102823	Non-significant	-0.842948	-0.685341	NPX ~ NPC1 * Age_c + Sex + Error(SampleID)	39	0.93
VCAN	ENSG00000038427	Neurology	P13611	OID21026	NPC1	0.109178	0.0381965	0.102997	Non-significant	-0.36696	-0.244336	NPX ~ NPC1 * Age_c + Sex + Error(SampleID)	39	0.12
WFIKKN1	ENSG00000127578	Neurology	Q96NZ8	OID20939	NPC1	0.0968921	0.0383741	0.103379	Non-significant	0.494874	0.405754	NPX ~ NPC1 * Age_c + Sex + Error(SampleID)	38	0.33
PAXX	ENSG00000148362	Inflammation_II	Q9BUH6	OID30591	NPC1	0.105258	0.0384687	0.103536	Non-significant	0.452548	0.488593	NPX ~ NPC1 * Age_c + Sex + Error(SampleID)	39	0.47
KLB	ENSG00000134962	Neurology	Q86Z14	OID20888	Age_c	0.189836	0.00702911	0.103661	Non-significant	0.0689611	-0.0781229	NPX ~ NPC1 * Age_c + Sex + Error(SampleID)		0.75
LRP2	ENSG00000081479	Neurology_II	P98164	OID30960	Age_c	0.189951	0.00700996	0.103661	Non-significant	0.601164	0.0592929	NPX ~ NPC1 * Age_c + Sex + Error(SampleID)		0.45
FMR1	ENSG00000102081	Oncology	Q06787	OID21233	NPC1	0.11328	0.0387184	0.104013	Non-significant	-1.47744	-1.53233	NPX ~ NPC1 * Age_c + Sex + Error(SampleID)	36	4.35
S100G	ENSG00000169906	Neurology_II	P29377	OID31051	NPC1	0.107301	0.0387032	0.104013	Non-significant	0.761942	0.675209	NPX ~ NPC1 * Age_c + Sex + Error(SampleID)	39	0.91
SERPINA9	ENSG00000170054	Oncology	Q86WD7	OID21284	NPC1:Age_c	0.243272	0.00142079	0.104228	Non-significant	0.00888591	0.101411	NPX ~ NPC1 * Age_c + Sex + Error(SampleID)		0.99
BLOC1S3	ENSG00000189114	Neurology_II	Q6QNY0	OID31106	NPC1	0.107741	0.0389672	0.104583	Non-significant	-0.440709	-0.357165	NPX ~ NPC1 * Age_c + Sex + Error(SampleID)	39	0.25
CENPF	ENSG00000117724	Oncology_II	P49454	OID31329	NPC1	0.110423	0.0391767	0.105046	Non-significant	1.06832	1.07278	NPX ~ NPC1 * Age_c + Sex + Error(SampleID)	37	2.23
AKR1C4	ENSG00000198610	Cardiometabolic	P17516	OID20062	NPC1	0.122301	0.0392534	0.105154	Non-significant	0.8098	0.986883	NPX ~ NPC1 * Age_c + Sex + Error(SampleID)	32	1.71
CYTH3	ENSG00000008256	Oncology_II	O43739	OID31208	NPC1	0.103328	0.039293	0.105161	Non-significant	0.975988	1.12763	NPX ~ NPC1 * Age_c + Sex + Error(SampleID)	39	2.54
FOXO3	ENSG00000118689	Oncology	O43524	OID21271	NPC1	0.112317	0.0396365	0.105882	Non-significant	-1.10014	-1.37186	NPX ~ NPC1 * Age_c + Sex + Error(SampleID)	36	3.52
TTR	ENSG00000118271	Inflammation_II	P02766	OID30782	NPC1	0.10049	0.0396035	0.105882	Non-significant	-0.0679267	-0.185194	NPX ~ NPC1 * Age_c + Sex + Error(SampleID)	39	0.07
DTD1	ENSG00000125821	Inflammation_II	Q8TEA8	OID30580	NPC1	0.106645	0.0397633	0.106122	Non-significant	-0.977108	-0.815434	NPX ~ NPC1 * Age_c + Sex + Error(SampleID)	39	1.34
SCGB3A1	ENSG00000161055	Inflammation_II	Q96QR1	OID30577	NPC1	0.107497	0.0398054	0.106135	Non-significant	-0.296157	-0.262222	NPX ~ NPC1 * Age_c + Sex + Error(SampleID)	39	0.14
KIF22	ENSG00000079616	Cardiometabolic_II	Q14807	OID30175	NPC1	0.107341	0.039849	0.106153	Non-significant	-0.919129	-0.875404	NPX ~ NPC1 * Age_c + Sex + Error(SampleID)	39	1.54
DENR	ENSG00000139726	Inflammation_II	O43583	OID30493	NPC1	0.102673	0.0401596	0.106781	Non-significant	0.711016	0.889133	NPX ~ NPC1 * Age_c + Sex + Error(SampleID)	39	1.60
ARID4B	ENSG00000054267	Neurology	Q4LE39	OID20803	NPC1	0.117031	0.040124	0.106781	Non-significant	-0.733946	-0.677362	NPX ~ NPC1 * Age_c + Sex + Error(SampleID)	35	0.79
ERC2	ENSG00000187672	Neurology_II	O15083	OID30880	NPC1	0.109089	0.0402109	0.106818	Non-significant	0.893042	0.760722	NPX ~ NPC1 * Age_c + Sex + Error(SampleID)	35	1.03
TAB2	ENSG00000055208	Oncology_II	Q9NYJ8	OID31319	NPC1	0.09738	0.0403606	0.107117	Non-significant	-1.21425	-0.970571	NPX ~ NPC1 * Age_c + Sex + Error(SampleID)	37	1.85
IGDCC3	ENSG00000174498	Neurology_II	Q8IVU1	OID30862	NPC1	0.104476	0.040625	0.107718	Non-significant	1.06589	1.00014	NPX ~ NPC1 * Age_c + Sex + Error(SampleID)	38	1.99
SPAG1	ENSG00000104450	Neurology_II	Q07617	OID30979	Age_c	0.170241	0.00734368	0.107745	Non-significant	-0.525962	-0.0492598	NPX ~ NPC1 * Age_c + Sex + Error(SampleID)		0.35
FETUB	ENSG00000090512	Cardiometabolic	Q9UGM5	OID20404	NPC1	0.103489	0.0406797	0.107764	Non-significant	-0.253678	-0.217714	NPX ~ NPC1 * Age_c + Sex + Error(SampleID)	39	0.10
RRM2B	ENSG00000048392	Oncology	Q7LG56	OID21174	NPC1	0.111393	0.0407504	0.107851	Non-significant	0.351736	0.504773	NPX ~ NPC1 * Age_c + Sex + Error(SampleID)	36	0.48
CTSV	ENSG00000136943	Oncology	O60911	OID21405	NPC1	0.116209	0.040872	0.108073	Non-significant	-0.202481	-0.232999	NPX ~ NPC1 * Age_c + Sex + Error(SampleID)	38	0.11
LTA	ENSG00000226979	Inflammation	P01374	OID20586	NPC1	0.125242	0.0410004	0.108312	Non-significant	0.18579	0.231448	NPX ~ NPC1 * Age_c + Sex + Error(SampleID)	37	0.11
HDDC2	ENSG00000111906	Oncology_II	Q7Z4H3	OID31447	NPC1	0.103099	0.0411043	0.108444	Non-significant	0.54186	0.539496	NPX ~ NPC1 * Age_c + Sex + Error(SampleID)	39	0.59
DDR1	ENSG00000204580	Neurology	Q08345	OID21009	NPC1	0.103406	0.0411261	0.108444	Non-significant	0.138456	0.18289	NPX ~ NPC1 * Age_c + Sex + Error(SampleID)	39	0.07
CCL22	ENSG00000102962	Inflammation	O00626	OID20765	Age_c	0.169634	0.0074599	0.108892	Non-significant	-0.231741	-0.0385992	NPX ~ NPC1 * Age_c + Sex + Error(SampleID)		0.22
ITIH3	ENSG00000162267	Cardiometabolic	Q06033	OID20352	NPC1:Age_c	0.229658	0.00152422	0.10902	Non-significant	0.392279	0.0470381	NPX ~ NPC1 * Age_c + Sex + Error(SampleID)		0.22
IST1	ENSG00000182149	Oncology_II	P53990	OID31497	NPC1	0.105475	0.041578	0.109535	Non-significant	-1.91069	-1.44421	NPX ~ NPC1 * Age_c + Sex + Error(SampleID)	39	4.28
ST8SIA1	ENSG00000111728	Inflammation_II	Q92185	OID30442	NPC1	0.104572	0.0416198	0.109544	Non-significant	-0.599842	-0.506495	NPX ~ NPC1 * Age_c + Sex + Error(SampleID)	39	0.53
KRT19	ENSG00000171345	Inflammation	P08727	OID20596	NPC1	0.101659	0.0418016	0.10982	Non-significant	0.552297	0.45369	NPX ~ NPC1 * Age_c + Sex + Error(SampleID)	37	0.44
AMDHD2	ENSG00000162066	Cardiometabolic_II	Q9Y303	OID30366	NPC1	0.10272	0.0417896	0.10982	Non-significant	0.331167	0.315385	NPX ~ NPC1 * Age_c + Sex + Error(SampleID)	39	0.20
SHD	ENSG00000105251	Cardiometabolic_II	Q96IW2	OID30098	NPC1	0.10344	0.0419969	0.110159	Non-significant	1.37071	1.37933	NPX ~ NPC1 * Age_c + Sex + Error(SampleID)	39	3.92
NUB1	ENSG00000013374	Inflammation	Q9Y5A7	OID20510	NPC1	0.0838696	0.0420077	0.110159	Non-significant	-0.925693	-0.868659	NPX ~ NPC1 * Age_c + Sex + Error(SampleID)	37	1.63
FCRL2	ENSG00000132704	Inflammation	Q96LA5	OID20639	NPC1	0.10658	0.0421485	0.110427	Non-significant	0.405695	0.383646	NPX ~ NPC1 * Age_c + Sex + Error(SampleID)	37	0.30
CENPJ	ENSG00000151849	Oncology_II	Q9HC77	OID31314	NPC1	0.102007	0.0423082	0.110643	Non-significant	-1.71778	-1.71335	NPX ~ NPC1 * Age_c + Sex + Error(SampleID)	37	5.87
AP2B1	ENSG00000006125	Neurology_II	P63010	OID30949	NPC1	0.112013	0.0422906	0.110643	Non-significant	1.01491	0.995161	NPX ~ NPC1 * Age_c + Sex + Error(SampleID)	35	1.81
PLA2G7	ENSG00000146070	Neurology	Q13093	OID21105	NPC1:Age_c	0.22797	0.00159561	0.111343	Non-significant	1.9879	-0.0267664	NPX ~ NPC1 * Age_c + Sex + Error(SampleID)		0.07
BLMH	ENSG00000108578	Cardiometabolic	Q13867	OID20336	Age_c	0.168216	0.00773832	0.111868	Non-significant	0.0206267	-0.0367403	NPX ~ NPC1 * Age_c + Sex + Error(SampleID)		0.20
GRN	ENSG00000030582	Neurology	P28799	OID21159	Age_c	0.168198	0.00774202	0.111868	Non-significant	0.125878	-0.0242007	NPX ~ NPC1 * Age_c + Sex + Error(SampleID)		0.09
PDE1C	ENSG00000154678	Oncology_II	Q14123	OID31201	NPC1	0.0996863	0.0428812	0.112039	Non-significant	0.42932	0.658765	NPX ~ NPC1 * Age_c + Sex + Error(SampleID)	39	0.90
EPB41L5	ENSG00000115109	Neurology_II	Q9HCM4	OID30886	NPC1	0.115801	0.0430913	0.112386	Non-significant	0.682205	0.913141	NPX ~ NPC1 * Age_c + Sex + Error(SampleID)	35	1.53
IGF2BP3	ENSG00000136231	Cardiometabolic_II	O00425	OID30112	NPC1	0.104041	0.0430925	0.112386	Non-significant	-1.21639	-0.83143	NPX ~ NPC1 * Age_c + Sex + Error(SampleID)	39	1.44
DPP10	ENSG00000175497	Inflammation	Q8N608	OID20527	Sex	0.258704	0.000945579	0.112721	Non-significant	0.716784	-0.291655	NPX ~ NPC1 * Age_c + Sex + Error(SampleID)		0.26
SPOCK1	ENSG00000152377	Neurology	Q08629	OID20924	NPC1	0.102151	0.0433304	0.112904	Non-significant	0.295216	0.236697	NPX ~ NPC1 * Age_c + Sex + Error(SampleID)	38	0.12
BST2	ENSG00000130303	Neurology	Q10589	OID21029	NPC1	0.101812	0.0434088	0.113005	Non-significant	0.631923	0.748229	NPX ~ NPC1 * Age_c + Sex + Error(SampleID)	39	1.17
CHP1	ENSG00000187446	Neurology_II	Q99653	OID30869	NPC1:Age_c	0.230969	0.00169635	0.113096	Non-significant	0.623857	0.208151	NPX ~ NPC1 * Age_c + Sex + Error(SampleID)		4.21
BMP10	ENSG00000163217	Inflammation_II	O95393	OID30575	NPC1:Age_c	0.225634	0.0016998	0.113096	Non-significant	0.220201	0.0387111	NPX ~ NPC1 * Age_c + Sex + Error(SampleID)		0.15
HSPB1	ENSG00000106211	Cardiometabolic	P04792	OID20230	NPC1	0.103514	0.0435346	0.113214	Non-significant	-1.3426	-1.08316	NPX ~ NPC1 * Age_c + Sex + Error(SampleID)	39	2.45
TPP1	ENSG00000166340	Inflammation	O14773	OID20750	NPC1	0.101123	0.0435682	0.113214	Non-significant	-0.379229	-0.323515	NPX ~ NPC1 * Age_c + Sex + Error(SampleID)	39	0.22
TNFAIP8L2	ENSG00000163154	Inflammation_II	Q6P589	OID30629	NPC1	0.103222	0.0436725	0.113382	Non-significant	-0.594215	-0.506556	NPX ~ NPC1 * Age_c + Sex + Error(SampleID)	39	0.54
CDHR2	ENSG00000074276	Oncology	Q9BYE9	OID21282	Sex	0.254031	0.00107039	0.113422	Non-significant	1.0074	0.514081	NPX ~ NPC1 * Age_c + Sex + Error(SampleID)		0.82
OMG	ENSG00000126861	Oncology	P23515	OID21352	Sex	0.254094	0.00106859	0.113422	Non-significant	0.63178	-0.461404	NPX ~ NPC1 * Age_c + Sex + Error(SampleID)		0.66
SCG3	ENSG00000104112	Inflammation	Q8WXD2	OID20728	Sex	0.243092	0.00105589	0.113422	Non-significant	0.40279	-0.297705	NPX ~ NPC1 * Age_c + Sex + Error(SampleID)		0.30
THOP1	ENSG00000172009	Cardiometabolic	P52888	OID20194	NPC1	0.1001	0.0437604	0.113507	Non-significant	0.340778	0.380186	NPX ~ NPC1 * Age_c + Sex + Error(SampleID)	39	0.30
MPHOSPH8	ENSG00000196199	Cardiometabolic	Q99549	OID20092	Age_c	0.200075	0.00799347	0.114347	Non-significant	-0.593862	-0.0838575	NPX ~ NPC1 * Age_c + Sex + Error(SampleID)		0.69
THBS4	ENSG00000113296	Cardiometabolic	P35443	OID20368	Age_c	0.166978	0.00798995	0.114347	Non-significant	0.14439	-0.0625192	NPX ~ NPC1 * Age_c + Sex + Error(SampleID)		0.58
MMP12	ENSG00000262406	Oncology	P39900	OID21439	Age_c	0.170408	0.00811511	0.114652	Non-significant	1.15166	-0.0597283	NPX ~ NPC1 * Age_c + Sex + Error(SampleID)		0.53
ANGPTL4	ENSG00000167772	Inflammation	Q9BY76	OID20703	Age_c	0.166494	0.00809029	0.114652	Non-significant	0.411812	0.0400957	NPX ~ NPC1 * Age_c + Sex + Error(SampleID)		0.24
TGFBR2	ENSG00000163513	Oncology	P37173	OID21493	Age_c	0.16628	0.00813503	0.114652	Non-significant	0.119934	0.0229667	NPX ~ NPC1 * Age_c + Sex + Error(SampleID)		0.08
LIF	ENSG00000128342	Neurology	P15018	OID20824	Age_c	0.183149	0.00823461	0.114695	Non-significant	-1.60765	-0.0930822	NPX ~ NPC1 * Age_c + Sex + Error(SampleID)		1.12
PTK7	ENSG00000112655	Neurology	Q13308	OID20880	Age_c	0.18329	0.00820715	0.114695	Non-significant	0.337817	-0.0423665	NPX ~ NPC1 * Age_c + Sex + Error(SampleID)		0.23
TNFSF13B	ENSG00000102524	Cardiometabolic	Q9Y275	OID20272	Age_c	0.16553	0.00829413	0.114695	Non-significant	0.0652508	-0.0303904	NPX ~ NPC1 * Age_c + Sex + Error(SampleID)		0.14
CBLN4	ENSG00000054803	Oncology	Q9NTU7	OID21386	Age_c	0.169524	0.00829842	0.114695	Non-significant	-0.0186583	-0.0188722	NPX ~ NPC1 * Age_c + Sex + Error(SampleID)		0.05
BLNK	ENSG00000095585	Inflammation_II	Q8WV28	OID30541	NPC1	0.10064	0.044395	0.115049	Non-significant	0.493014	0.519914	NPX ~ NPC1 * Age_c + Sex + Error(SampleID)	39	0.57
PPCDC	ENSG00000138621	Neurology	Q96CD2	OID21027	NPC1	0.100265	0.0445035	0.115226	Non-significant	0.606059	0.566097	NPX ~ NPC1 * Age_c + Sex + Error(SampleID)	39	0.68
FCRL5	ENSG00000143297	Neurology	Q96RD9	OID21111	Age_c	0.165113	0.00838381	0.115318	Non-significant	0.542117	0.0540445	NPX ~ NPC1 * Age_c + Sex + Error(SampleID)		0.44
KLKB1	ENSG00000164344	Inflammation_II	P03952	OID30760	NPC1	0.101713	0.0447071	0.115648	Non-significant	-0.287114	-0.263306	NPX ~ NPC1 * Age_c + Sex + Error(SampleID)	39	0.15
CRNN	ENSG00000143536	Oncology	Q9UBG3	OID21427	NPC1:Age_c	0.229157	0.00177978	0.115726	Non-significant	0.02647	0.087954	NPX ~ NPC1 * Age_c + Sex + Error(SampleID)		0.79
IL22	ENSG00000127318	Oncology_II	Q9GZX6	OID31407	NPC1	0.0998217	0.0449837	0.116178	Non-significant	0.643882	0.754212	NPX ~ NPC1 * Age_c + Sex + Error(SampleID)	39	1.21
REG3G	ENSG00000143954	Oncology_II	Q6UW15	OID31408	NPC1	0.0984476	0.0449931	0.116178	Non-significant	0.360947	0.465181	NPX ~ NPC1 * Age_c + Sex + Error(SampleID)	39	0.46
RILP	ENSG00000167705	Oncology	Q96NA2	OID21436	NPC1	0.0997062	0.0450435	0.116203	Non-significant	1.20036	1.0895	NPX ~ NPC1 * Age_c + Sex + Error(SampleID)	38	2.54
PSME2	ENSG00000100911	Neurology	Q9UL46	OID20989	NPC1	0.100728	0.0451134	0.116279	Non-significant	0.632454	0.602532	NPX ~ NPC1 * Age_c + Sex + Error(SampleID)	38	0.78
BCAT1	ENSG00000060982	Cardiometabolic_II	P54687	OID30312	Age_c	0.16849	0.00851774	0.116563	Non-significant	0.385438	-0.0579613	NPX ~ NPC1 * Age_c + Sex + Error(SampleID)		0.50
CLUL1	ENSG00000079101	Cardiometabolic	Q15846	OID20198	Age_c	0.164169	0.00859042	0.116563	Non-significant	-0.0199525	-0.0449692	NPX ~ NPC1 * Age_c + Sex + Error(SampleID)		0.30
OPTC	ENSG00000188770	Oncology	Q9UBM4	OID21362	Age_c	0.172116	0.00863734	0.116563	Non-significant	0.418969	-0.0416237	NPX ~ NPC1 * Age_c + Sex + Error(SampleID)		0.26
OMD	ENSG00000127083	Inflammation	Q99983	OID20725	Age_c	0.164	0.00862786	0.116563	Non-significant	-0.219145	-0.0286035	NPX ~ NPC1 * Age_c + Sex + Error(SampleID)		0.12
ADGRD1	ENSG00000111452	Inflammation_II	Q6QNK2	OID30588	NPC1	0.0996262	0.0452911	0.116632	Non-significant	0.316835	0.417983	NPX ~ NPC1 * Age_c + Sex + Error(SampleID)	39	0.37
NRCAM	ENSG00000091129	Cardiometabolic	Q92823	OID20229	NPC1:Age_c	0.222682	0.00184084	0.117036	Non-significant	0.397193	0.0295302	NPX ~ NPC1 * Age_c + Sex + Error(SampleID)		0.09
DEFB103A_DEFB103B		Inflammation_II	P81534	OID30534	Age_c	0.163345	0.00877467	0.11731	Non-significant	0.300827	0.0683615	NPX ~ NPC1 * Age_c + Sex + Error(SampleID)		0.71
RNASE4	ENSG00000258818	Inflammation_II	P34096	OID30705	Age_c	0.16341	0.00876	0.11731	Non-significant	0.116783	0.0167803	NPX ~ NPC1 * Age_c + Sex + Error(SampleID)		0.04
IMPACT	ENSG00000154059	Neurology_II	Q9P2X3	OID31112	NPC1	0.0986219	0.0458957	0.118024	Non-significant	0.879988	0.864082	NPX ~ NPC1 * Age_c + Sex + Error(SampleID)	39	1.60
PARP1	ENSG00000143799	Inflammation	P09874	OID20500	NPC1	0.0796769	0.0459144	0.118024	Non-significant	-0.714449	-0.709888	NPX ~ NPC1 * Age_c + Sex + Error(SampleID)	37	1.13
HDAC9	ENSG00000048052	Neurology_II	Q9UKV0	OID30832	Age_c	0.166573	0.00893966	0.11896	Non-significant	1.27427	-0.221307	NPX ~ NPC1 * Age_c + Sex + Error(SampleID)		7.15
BTN3A2	ENSG00000186470	Inflammation	P78410	OID20540	NPC1	0.0781708	0.0464995	0.119421	Non-significant	-0.490646	-0.372731	NPX ~ NPC1 * Age_c + Sex + Error(SampleID)	37	0.31
HIF1A	ENSG00000100644	Inflammation_II	Q16665	OID30425	NPC1	0.100349	0.0466284	0.119645	Non-significant	-0.928767	-0.686096	NPX ~ NPC1 * Age_c + Sex + Error(SampleID)	39	1.01
NELL2	ENSG00000184613	Inflammation	Q99435	OID20706	NPC1	0.0946103	0.0466719	0.119649	Non-significant	0.0336325	0.309704	NPX ~ NPC1 * Age_c + Sex + Error(SampleID)	39	0.21
SEMA3G	ENSG00000010319	Inflammation_II	Q9NS98	OID30599	NPC1	0.0954464	0.0467403	0.119717	Non-significant	0.164432	0.250325	NPX ~ NPC1 * Age_c + Sex + Error(SampleID)	39	0.14
RGCC	ENSG00000102760	Neurology_II	Q9H4X1	OID31060	NPC1	0.0991424	0.0469543	0.120158	Non-significant	-0.560368	-0.499787	NPX ~ NPC1 * Age_c + Sex + Error(SampleID)	39	0.54
PNMA1	ENSG00000176903	Cardiometabolic_II	Q8ND90	OID30194	NPC1	0.100679	0.0470355	0.120258	Non-significant	-0.749043	-0.67366	NPX ~ NPC1 * Age_c + Sex + Error(SampleID)	38	0.94
SWAP70	ENSG00000133789	Oncology_II	Q9UH65	OID31477	NPC1	0.0964659	0.0471611	0.120471	Non-significant	0.343714	0.47871	NPX ~ NPC1 * Age_c + Sex + Error(SampleID)	39	0.50
HS6ST2	ENSG00000171004	Inflammation_II	Q96MM7	OID30481	NPC1	0.0994996	0.0472229	0.120522	Non-significant	0.415859	0.362888	NPX ~ NPC1 * Age_c + Sex + Error(SampleID)	39	0.29
KIRREL2	ENSG00000126259	Neurology	Q6UWL6	OID20873	Age_c	0.178178	0.00925837	0.122631	Non-significant	0.247794	-0.0503978	NPX ~ NPC1 * Age_c + Sex + Error(SampleID)		0.34
AZI2	ENSG00000163512	Neurology_II	Q9H6S1	OID31056	NPC1	0.0998365	0.0480995	0.122649	Non-significant	-0.874904	-0.670526	NPX ~ NPC1 * Age_c + Sex + Error(SampleID)	39	0.98
HGF	ENSG00000019991	Inflammation	P14210	OID20656	NPC1	0.101336	0.0482142	0.122832	Non-significant	-0.232432	-0.288077	NPX ~ NPC1 * Age_c + Sex + Error(SampleID)	37	0.18
ERBB3	ENSG00000065361	Inflammation	P21860	OID20705	NPC1	0.0933633	0.0483081	0.122962	Non-significant	0.0561567	0.151395	NPX ~ NPC1 * Age_c + Sex + Error(SampleID)	39	0.05
CCN3	ENSG00000136999	Cardiometabolic	P48745	OID20299	Age_c	0.160786	0.00937213	0.123565	Non-significant	-0.171687	-0.0547362	NPX ~ NPC1 * Age_c + Sex + Error(SampleID)		0.46
SNRPB2	ENSG00000125870	Neurology_II	P08579	OID31132	NPC1	0.0986704	0.0486683	0.123659	Non-significant	-1.38401	-1.13234	NPX ~ NPC1 * Age_c + Sex + Error(SampleID)	39	2.82
ILKAP	ENSG00000132323	Neurology	Q9H0C8	OID20855	NPC1	0.108596	0.0486632	0.123659	Non-significant	-0.971449	-0.871584	NPX ~ NPC1 * Age_c + Sex + Error(SampleID)	35	1.43
CRTAC1	ENSG00000095713	Cardiometabolic	Q9NQ79	OID20279	NPC1:Age_c	0.219635	0.0019983	0.124286	Non-significant	-0.293561	0.0259804	NPX ~ NPC1 * Age_c + Sex + Error(SampleID)		0.07
FDX2	ENSG00000267673	Cardiometabolic_II	Q6P4F2	OID30147	NPC1	0.0948867	0.0490026	0.124398	Non-significant	0.858989	1.04514	NPX ~ NPC1 * Age_c + Sex + Error(SampleID)	39	2.41
PKLR	ENSG00000143627	Inflammation	P30613	OID20682	NPC1	0.0960295	0.0491307	0.124586	Non-significant	0.949329	0.920299	NPX ~ NPC1 * Age_c + Sex + Error(SampleID)	39	1.87
SCARF2	ENSG00000244486	Neurology	Q96GP6	OID21048	NPC1	0.0949047	0.0491638	0.124586	Non-significant	0.233205	0.272737	NPX ~ NPC1 * Age_c + Sex + Error(SampleID)	39	0.16
BMPER	ENSG00000164619	Inflammation_II	Q8N8U9	OID30615	NPC1	0.0977702	0.0493105	0.124847	Non-significant	0.212889	0.17	NPX ~ NPC1 * Age_c + Sex + Error(SampleID)	39	0.06
KLK4	ENSG00000167749	Oncology	Q9Y5K2	OID21391	NPC1:Age_c	0.221726	0.00216533	0.124989	Non-significant	0.0015037	0.141965	NPX ~ NPC1 * Age_c + Sex + Error(SampleID)		2.14
KLB	ENSG00000134962	Neurology	Q86Z14	OID20888	NPC1:Age_c	0.239603	0.00210672	0.124989	Non-significant	0.0689611	0.0906164	NPX ~ NPC1 * Age_c + Sex + Error(SampleID)		0.75
SPAG1	ENSG00000104450	Neurology_II	Q07617	OID30979	NPC1:Age_c	0.215429	0.0022371	0.124989	Non-significant	-0.525962	0.0569487	NPX ~ NPC1 * Age_c + Sex + Error(SampleID)		0.35
ENDOU	ENSG00000111405	Oncology_II	P21128	OID31498	NPC1:Age_c	0.218396	0.00206598	0.124989	Non-significant	-0.178595	-0.0413056	NPX ~ NPC1 * Age_c + Sex + Error(SampleID)		0.18
SPINK1	ENSG00000164266	Neurology	P00995	OID21097	NPC1:Age_c	0.214856	0.00227174	0.124989	Non-significant	0.184062	0.0391567	NPX ~ NPC1 * Age_c + Sex + Error(SampleID)		0.17
GDF2	ENSG00000263761	Cardiometabolic	Q9UK05	OID20202	NPC1:Age_c	0.215914	0.00220822	0.124989	Non-significant	-0.0690783	0.0388176	NPX ~ NPC1 * Age_c + Sex + Error(SampleID)		0.16
FGL1	ENSG00000104760	Inflammation_II	Q08830	OID30702	NPC1	0.0973105	0.0495492	0.125341	Non-significant	-0.806043	-0.664885	NPX ~ NPC1 * Age_c + Sex + Error(SampleID)	39	0.98
GCG	ENSG00000115263	Oncology	P01275	OID21263	Age_c	0.172117	0.00960079	0.125681	Non-significant	-0.11054	-0.101524	NPX ~ NPC1 * Age_c + Sex + Error(SampleID)		1.32
NPDC1	ENSG00000107281	Cardiometabolic	Q9NQX5	OID20205	Age_c	0.159769	0.00962042	0.125681	Non-significant	0.538874	-0.0335326	NPX ~ NPC1 * Age_c + Sex + Error(SampleID)		0.17
CD72	ENSG00000137101	Inflammation_II	P21854	OID30641	Age_c	0.159554	0.00967391	0.125805	Non-significant	1.342	-0.039294	NPX ~ NPC1 * Age_c + Sex + Error(SampleID)		0.24
PGR	ENSG00000082175	Inflammation_II	P06401	OID30460	NPC1	0.0962083	0.0500703	0.125831	Non-significant	-1.10965	-0.996681	NPX ~ NPC1 * Age_c + Sex + Error(SampleID)	39	2.21
TMPRSS15	ENSG00000154646	Oncology	P98073	OID21364	NPC1	0.0995983	0.0500024	0.125831	Non-significant	0.550335	0.647454	NPX ~ NPC1 * Age_c + Sex + Error(SampleID)	37	0.89
UHRF2	ENSG00000147854	Cardiometabolic_II	Q96PU4	OID30171	NPC1	0.0954038	0.0500238	0.125831	Non-significant	-0.43602	-0.641608	NPX ~ NPC1 * Age_c + Sex + Error(SampleID)	39	0.92
TSPYL1	ENSG00000189241	Inflammation_II	Q9H0U9	OID30512	NPC1	0.09796	0.0498452	0.125831	Non-significant	-0.703387	-0.570063	NPX ~ NPC1 * Age_c + Sex + Error(SampleID)	39	0.72
KIRREL2	ENSG00000126259	Neurology	Q6UWL6	OID20873	NPC1	0.104905	0.0500488	0.125831	Non-significant	0.247794	0.421901	NPX ~ NPC1 * Age_c + Sex + Error(SampleID)	35	0.34
SERPINI2	ENSG00000114204	Oncology_II	O75830	OID31504	NPC1	0.0945766	0.0500947	0.125831	Non-significant	0.403944	0.366026	NPX ~ NPC1 * Age_c + Sex + Error(SampleID)	39	0.30
SOD2	ENSG00000291237	Neurology	P04179	OID21114	NPC1	0.0967006	0.0499167	0.125831	Non-significant	0.261346	0.294286	NPX ~ NPC1 * Age_c + Sex + Error(SampleID)	39	0.19
PDIA4	ENSG00000155660	Cardiometabolic_II	P13667	OID30375	NPC1	0.0977393	0.0498984	0.125831	Non-significant	-0.375376	-0.291435	NPX ~ NPC1 * Age_c + Sex + Error(SampleID)	39	0.19
CCL23	ENSG00000274736	Inflammation	P55773	OID20693	NPC1	0.0964795	0.0501996	0.125983	Non-significant	0.24346	0.242563	NPX ~ NPC1 * Age_c + Sex + Error(SampleID)	39	0.13
CETN2	ENSG00000147400	Neurology	P41208	OID20836	NPC1	0.106731	0.0502468	0.125991	Non-significant	-0.962469	-0.978048	NPX ~ NPC1 * Age_c + Sex + Error(SampleID)	35	1.82
EIF5A	ENSG00000132507	Inflammation	P63241	OID20423	NPC1	0.102208	0.0503855	0.126229	Non-significant	-0.317113	-0.467545	NPX ~ NPC1 * Age_c + Sex + Error(SampleID)	36	0.40
FGF23	ENSG00000118972	Oncology	Q9GZV9	OID21411	Age_c	0.163093	0.00975817	0.126326	Non-significant	0.781181	-0.0518482	NPX ~ NPC1 * Age_c + Sex + Error(SampleID)		0.42
APLP1	ENSG00000105290	Cardiometabolic	P51693	OID20164	Sex	0.237302	0.00123763	0.126459	Non-significant	0.588352	-0.374903	NPX ~ NPC1 * Age_c + Sex + Error(SampleID)		0.48
APOA2	ENSG00000158874	Inflammation_II	P02652	OID30686	NPC1	0.0948911	0.0512935	0.128391	Non-significant	0.530294	0.602168	NPX ~ NPC1 * Age_c + Sex + Error(SampleID)	39	0.82
KRT5	ENSG00000186081	Neurology	P13647	OID20860	NPC1	0.105932	0.0515327	0.128877	Non-significant	-0.655205	-0.426899	NPX ~ NPC1 * Age_c + Sex + Error(SampleID)	35	0.35
AAMDC	ENSG00000087884	Cardiometabolic_II	Q9H7C9	OID30236	NPC1	0.0976563	0.0516072	0.12895	Non-significant	-0.731296	-0.580625	NPX ~ NPC1 * Age_c + Sex + Error(SampleID)	38	0.73
PFDN2	ENSG00000143256	Neurology	Q9UHV9	OID20892	NPC1	0.105744	0.0520633	0.129977	Non-significant	-0.455013	-0.367206	NPX ~ NPC1 * Age_c + Sex + Error(SampleID)	35	0.26
PTX3	ENSG00000163661	Inflammation	P26022	OID20570	NPC1	0.0865958	0.0521423	0.130014	Non-significant	-0.35007	-0.313106	NPX ~ NPC1 * Age_c + Sex + Error(SampleID)	37	0.23
CPOX	ENSG00000080819	Inflammation_II	P36551	OID30495	NPC1	0.0942946	0.0521693	0.130014	Non-significant	0.280648	0.295634	NPX ~ NPC1 * Age_c + Sex + Error(SampleID)	39	0.20
SCGB3A2	ENSG00000164265	Inflammation	Q96PL1	OID20723	NPC1	0.0914243	0.0523851	0.130438	Non-significant	0.309744	0.612562	NPX ~ NPC1 * Age_c + Sex + Error(SampleID)	39	0.85
MAPT	ENSG00000186868	Neurology	P10636	OID20830	NPC1	0.102677	0.0528116	0.131075	Non-significant	1.33453	1.95663	NPX ~ NPC1 * Age_c + Sex + Error(SampleID)	35	7.47
OBP2B	ENSG00000171102	Neurology	Q9NPH6	OID20980	NPC1	0.103204	0.0528242	0.131075	Non-significant	-0.481557	-0.631122	NPX ~ NPC1 * Age_c + Sex + Error(SampleID)	38	0.92
LTBP3	ENSG00000168056	Oncology	Q9NS15	OID21191	NPC1	0.100157	0.0527783	0.131075	Non-significant	0.424872	0.415806	NPX ~ NPC1 * Age_c + Sex + Error(SampleID)	36	0.37
CNTN2	ENSG00000184144	Oncology	Q02246	OID21426	NPC1	0.101437	0.0527532	0.131075	Non-significant	0.306476	0.359196	NPX ~ NPC1 * Age_c + Sex + Error(SampleID)	38	0.30
GID8	ENSG00000101193	Neurology_II	Q9NWU2	OID31041	NPC1	0.0930203	0.053054	0.131418	Non-significant	0.613605	0.619316	NPX ~ NPC1 * Age_c + Sex + Error(SampleID)	39	0.88
IGSF3	ENSG00000143061	Oncology	O75054	OID21312	NPC1	0.0975769	0.0530386	0.131418	Non-significant	0.299216	0.430291	NPX ~ NPC1 * Age_c + Sex + Error(SampleID)	37	0.40
IGHMBP2	ENSG00000132740	Cardiometabolic_II	P38935	OID30123	NPC1	0.094197	0.0533835	0.132119	Non-significant	-1.22455	-1.07877	NPX ~ NPC1 * Age_c + Sex + Error(SampleID)	39	2.67
BNIP3L	ENSG00000104765	Inflammation_II	O60238	OID30525	NPC1	0.0953145	0.0534477	0.132164	Non-significant	-0.861249	-0.677983	NPX ~ NPC1 * Age_c + Sex + Error(SampleID)	39	1.05
REG1A	ENSG00000115386	Cardiometabolic	P05451	OID20415	NPC1	0.0908402	0.0535519	0.132308	Non-significant	0.253913	0.348569	NPX ~ NPC1 * Age_c + Sex + Error(SampleID)	39	0.28
LMOD1	ENSG00000163431	Neurology_II	P29536	OID31014	Age_c	0.157222	0.0102711	0.132368	Non-significant	0.26266	0.0435361	NPX ~ NPC1 * Age_c + Sex + Error(SampleID)		0.30
COPB2	ENSG00000184432	Cardiometabolic_II	P35606	OID30173	NPC1	0.0939124	0.0537033	0.132567	Non-significant	-1.68449	-1.47177	NPX ~ NPC1 * Age_c + Sex + Error(SampleID)	39	4.98
SARG		Cardiometabolic_II	Q9BW04	OID30331	NPC1	0.102687	0.0538147	0.132727	Non-significant	-0.71315	-0.749365	NPX ~ NPC1 * Age_c + Sex + Error(SampleID)	38	1.23
SORD	ENSG00000140263	Oncology	Q00796	OID21453	NPC1	0.0936234	0.054022	0.133025	Non-significant	0.692692	0.714171	NPX ~ NPC1 * Age_c + Sex + Error(SampleID)	38	1.19
NOS2	ENSG00000007171	Cardiometabolic_II	P35228	OID30087	NPC1	0.0919823	0.0540284	0.133025	Non-significant	0.418642	0.505826	NPX ~ NPC1 * Age_c + Sex + Error(SampleID)	39	0.59
BSND	ENSG00000162399	Oncology_II	Q8WZ55	OID31184	NPC1	0.0914411	0.0544318	0.13374	Non-significant	0.794606	1.08984	NPX ~ NPC1 * Age_c + Sex + Error(SampleID)	39	2.75
NPTX1	ENSG00000171246	Neurology	Q15818	OID21074	NPC1	0.0918485	0.054459	0.13374	Non-significant	0.319503	0.375226	NPX ~ NPC1 * Age_c + Sex + Error(SampleID)	39	0.33
IL17D	ENSG00000172458	Inflammation	Q8TAD2	OID20481	NPC1	0.0989911	0.054388	0.13374	Non-significant	0.402225	0.310415	NPX ~ NPC1 * Age_c + Sex + Error(SampleID)	36	0.18
KCNIP4	ENSG00000185774	Neurology	Q6PIL6	OID20813	NPC1:Age_c	0.232167	0.00253082	0.134461	Non-significant	0.660289	0.126797	NPX ~ NPC1 * Age_c + Sex + Error(SampleID)		1.54
SCRG1	ENSG00000164106	Cardiometabolic_II	O75711	OID30333	NPC1:Age_c	0.215672	0.00253788	0.134461	Non-significant	-0.0231274	0.0654208	NPX ~ NPC1 * Age_c + Sex + Error(SampleID)		0.47
CGREF1	ENSG00000138028	Cardiometabolic	Q99674	OID20152	Age_c	0.156421	0.0104844	0.13451	Non-significant	-0.0278008	-0.0492214	NPX ~ NPC1 * Age_c + Sex + Error(SampleID)		0.39
CPA2	ENSG00000158516	Neurology	P48052	OID21060	NPC1:Age_c	0.205283	0.0029324	0.134804	Non-significant	-0.0689958	0.0578099	NPX ~ NPC1 * Age_c + Sex + Error(SampleID)		0.38
STC2	ENSG00000113739	Neurology	O76061	OID21157	NPC1:Age_c	0.2048	0.00297025	0.134804	Non-significant	0.420248	-0.0563749	NPX ~ NPC1 * Age_c + Sex + Error(SampleID)		0.36
ACAN	ENSG00000157766	Cardiometabolic	P16112	OID20159	NPC1:Age_c	0.206373	0.00284869	0.134804	Non-significant	-0.242372	0.0548245	NPX ~ NPC1 * Age_c + Sex + Error(SampleID)		0.34
CD40	ENSG00000101017	Inflammation	P25942	OID20724	NPC1:Age_c	0.209831	0.00259814	0.134804	Non-significant	-0.334319	0.0449694	NPX ~ NPC1 * Age_c + Sex + Error(SampleID)		0.23
NELL2	ENSG00000184613	Inflammation	Q99435	OID20706	NPC1:Age_c	0.208544	0.00268883	0.134804	Non-significant	0.0336325	0.0429498	NPX ~ NPC1 * Age_c + Sex + Error(SampleID)		0.21
CYTL1	ENSG00000170891	Cardiometabolic_II	Q9NRR1	OID30374	NPC1:Age_c	0.206714	0.00282302	0.134804	Non-significant	0.125316	0.0423091	NPX ~ NPC1 * Age_c + Sex + Error(SampleID)		0.20
ITGA11	ENSG00000137809	Inflammation	Q9UKX5	OID20581	NPC1:Age_c	0.21849	0.00269741	0.134804	Non-significant	-0.143437	0.0396056	NPX ~ NPC1 * Age_c + Sex + Error(SampleID)		0.17
ASPN	ENSG00000106819	Cardiometabolic_II	Q9BXN1	OID30315	NPC1:Age_c	0.209059	0.00301554	0.134804	Non-significant	0.297761	0.0356637	NPX ~ NPC1 * Age_c + Sex + Error(SampleID)		0.15
DPP4	ENSG00000197635	Cardiometabolic	P27487	OID20406	NPC1:Age_c	0.207797	0.00274285	0.134804	Non-significant	-0.160887	0.0312653	NPX ~ NPC1 * Age_c + Sex + Error(SampleID)		0.11
ITGAV	ENSG00000138448	Oncology	P06756	OID21416	NPC1:Age_c	0.210788	0.00288294	0.134804	Non-significant	-0.196542	0.0241766	NPX ~ NPC1 * Age_c + Sex + Error(SampleID)		0.07
BAMBI	ENSG00000095739	Oncology	Q13145	OID21267	NPC1	0.0985504	0.0549842	0.134914	Non-significant	0.205288	0.289445	NPX ~ NPC1 * Age_c + Sex + Error(SampleID)	36	0.18
REPS1	ENSG00000135597	Inflammation_II	Q96D71	OID30496	NPC1	0.0912337	0.0555203	0.136113	Non-significant	0.675073	0.685173	NPX ~ NPC1 * Age_c + Sex + Error(SampleID)	39	1.10
DUSP3	ENSG00000108861	Neurology	P51452	OID20827	NPC1	0.101922	0.0556462	0.136228	Non-significant	-1.42404	-1.48216	NPX ~ NPC1 * Age_c + Sex + Error(SampleID)	35	4.39
PRUNE2	ENSG00000106772	Oncology_II	Q8WUY3	OID31270	NPC1	0.0860585	0.0557102	0.136228	Non-significant	1.05789	0.840499	NPX ~ NPC1 * Age_c + Sex + Error(SampleID)	37	1.60
FGF19	ENSG00000162344	Inflammation	O95750	OID20715	NPC1	0.0904998	0.0556913	0.136228	Non-significant	0.46712	0.625748	NPX ~ NPC1 * Age_c + Sex + Error(SampleID)	39	0.92
DAG1	ENSG00000173402	Inflammation	Q14118	OID20774	NPC1	0.093993	0.0557684	0.136254	Non-significant	-0.772387	-0.504891	NPX ~ NPC1 * Age_c + Sex + Error(SampleID)	39	0.60
PLAU	ENSG00000122861	Neurology	P00749	OID21124	Age_c	0.155702	0.0106796	0.136403	Non-significant	0.506247	-0.0264575	NPX ~ NPC1 * Age_c + Sex + Error(SampleID)		0.11
DHODH	ENSG00000102967	Cardiometabolic_II	Q02127	OID30137	Age_c	0.155345	0.0107778	0.13644	Non-significant	0.519854	0.0886195	NPX ~ NPC1 * Age_c + Sex + Error(SampleID)		1.26
CD5	ENSG00000110448	Oncology	P06127	OID21449	Age_c	0.159209	0.0107583	0.13644	Non-significant	0.559452	-0.0317951	NPX ~ NPC1 * Age_c + Sex + Error(SampleID)		0.16
DXO	ENSG00000204348	Neurology_II	O77932	OID31080	NPC1	0.0899673	0.0561485	0.137066	Non-significant	0.547191	0.650721	NPX ~ NPC1 * Age_c + Sex + Error(SampleID)	39	0.99
SEPTIN3	ENSG00000100167	Neurology_II	Q9UH03	OID31025	Age_c	0.154821	0.0109236	0.137575	Non-significant	0.235864	0.0717871	NPX ~ NPC1 * Age_c + Sex + Error(SampleID)		0.83
KLK14	ENSG00000129437	Oncology	Q9P0G3	OID21407	Age_c	0.158456	0.0109637	0.137575	Non-significant	0.338995	-0.0410718	NPX ~ NPC1 * Age_c + Sex + Error(SampleID)		0.27
EPHA2	ENSG00000142627	Oncology	P29317	OID21342	NPC1	0.0942755	0.0567706	0.138466	Non-significant	0.258012	0.371722	NPX ~ NPC1 * Age_c + Sex + Error(SampleID)	37	0.31
HDAC9	ENSG00000048052	Neurology_II	Q9UKV0	OID30832	NPC1:Age_c	0.206943	0.00318599	0.138652	Non-significant	1.27427	0.252754	NPX ~ NPC1 * Age_c + Sex + Error(SampleID)		7.15
MYLPF		Neurology_II	Q96A32	OID30917	NPC1:Age_c	0.221981	0.00324702	0.138652	Non-significant	0.596827	-0.110072	NPX ~ NPC1 * Age_c + Sex + Error(SampleID)		1.28
SCG3	ENSG00000104112	Inflammation	Q8WXD2	OID20728	NPC1:Age_c	0.201725	0.00322259	0.138652	Non-significant	0.40279	0.0502896	NPX ~ NPC1 * Age_c + Sex + Error(SampleID)		0.30
TRPV3	ENSG00000167723	Cardiometabolic_II	Q8NET8	OID30128	NPC1	0.0897399	0.0569673	0.138717	Non-significant	0.746619	0.749342	NPX ~ NPC1 * Age_c + Sex + Error(SampleID)	39	1.33
CD2	ENSG00000116824	Cardiometabolic_II	P06729	OID30097	NPC1	0.088763	0.0569704	0.138717	Non-significant	0.281956	0.354501	NPX ~ NPC1 * Age_c + Sex + Error(SampleID)	39	0.30
RNF31	ENSG00000092098	Inflammation_II	Q96EP0	OID30473	NPC1	0.0903079	0.0571769	0.138891	Non-significant	-0.847809	-0.886308	NPX ~ NPC1 * Age_c + Sex + Error(SampleID)	39	1.86
FYB1	ENSG00000082074	Neurology	O15117	OID21140	NPC1	0.0925045	0.0571141	0.138891	Non-significant	-1.12047	-0.85326	NPX ~ NPC1 * Age_c + Sex + Error(SampleID)	39	1.72
CHRDL2	ENSG00000054938	Cardiometabolic	Q6WN34	OID20223	NPC1	0.0902041	0.0571874	0.138891	Non-significant	-0.364486	-0.383224	NPX ~ NPC1 * Age_c + Sex + Error(SampleID)	39	0.35
SERPINA5	ENSG00000188488	Inflammation_II	P05154	OID30763	NPC1	0.090038	0.0575819	0.13973	Non-significant	-0.527661	-0.508038	NPX ~ NPC1 * Age_c + Sex + Error(SampleID)	39	0.61
RIPK4	ENSG00000183421	Cardiometabolic_II	P57078	OID30138	NPC1	0.091358	0.0577122	0.139928	Non-significant	0.62673	0.521765	NPX ~ NPC1 * Age_c + Sex + Error(SampleID)	39	0.65
EFNA4	ENSG00000243364	Neurology	P52798	OID20935	NPC1	0.092181	0.0578034	0.14003	Non-significant	0.17984	0.235427	NPX ~ NPC1 * Age_c + Sex + Error(SampleID)	38	0.13
SLC12A2	ENSG00000064651	Cardiometabolic_II	P55011	OID30077	NPC1	0.0886878	0.0578745	0.140084	Non-significant	0.409765	0.571443	NPX ~ NPC1 * Age_c + Sex + Error(SampleID)	39	0.78
FGF12	ENSG00000114279	Inflammation_II	P61328	OID30454	Sex	0.232264	0.00141998	0.140088	Non-significant	0.332173	-0.419131	NPX ~ NPC1 * Age_c + Sex + Error(SampleID)		0.62
MYH7B	ENSG00000078814	Oncology_II	A7E2Y1	OID31178	NPC1	0.0899599	0.0579522	0.140153	Non-significant	0.922376	0.98019	NPX ~ NPC1 * Age_c + Sex + Error(SampleID)	39	2.29
ZBTB16	ENSG00000109906	Oncology	Q05516	OID21205	NPC1	0.0960452	0.0582152	0.14067	Non-significant	-0.509605	-0.618027	NPX ~ NPC1 * Age_c + Sex + Error(SampleID)	36	0.85
FAM171B	ENSG00000144369	Oncology_II	Q6P995	OID31338	NPC1	0.0889992	0.0586816	0.141678	Non-significant	0.281654	0.35831	NPX ~ NPC1 * Age_c + Sex + Error(SampleID)	39	0.31
CNDP1	ENSG00000150656	Cardiometabolic	Q96KN2	OID20347	Age_c	0.15306	0.011428	0.142248	Non-significant	-1.24406	0.0995015	NPX ~ NPC1 * Age_c + Sex + Error(SampleID)		1.62
INHBB	ENSG00000163083	Inflammation_II	P09529	OID30625	Age_c	0.153034	0.0114356	0.142248	Non-significant	0.51144	0.046358	NPX ~ NPC1 * Age_c + Sex + Error(SampleID)		0.35
IGBP1	ENSG00000089289	Neurology_II	P78318	OID31059	NPC1	0.0880006	0.059064	0.142262	Non-significant	0.995997	1.10589	NPX ~ NPC1 * Age_c + Sex + Error(SampleID)	39	2.94
MEP1B	ENSG00000141434	Cardiometabolic	Q16820	OID20168	NPC1	0.0890371	0.0591222	0.142262	Non-significant	-0.508692	-0.670055	NPX ~ NPC1 * Age_c + Sex + Error(SampleID)	39	1.08
GFRAL	ENSG00000187871	Neurology_II	Q6UXV0	OID31091	NPC1	0.0905192	0.059066	0.142262	Non-significant	0.705952	0.607918	NPX ~ NPC1 * Age_c + Sex + Error(SampleID)	39	0.89
EDA2R	ENSG00000131080	Oncology	Q9HAV5	OID21451	NPC1	0.0842903	0.0591227	0.142262	Non-significant	-0.252985	-0.272032	NPX ~ NPC1 * Age_c + Sex + Error(SampleID)	38	0.18
ERBB3	ENSG00000065361	Inflammation	P21860	OID20705	NPC1:Age_c	0.199714	0.00339869	0.142995	Non-significant	0.0561567	0.0205917	NPX ~ NPC1 * Age_c + Sex + Error(SampleID)		0.05
BRME1	ENSG00000132016	Neurology_II	Q0VDD7	OID30847	NPC1	0.092532	0.0598516	0.143797	Non-significant	0.708504	0.720564	NPX ~ NPC1 * Age_c + Sex + Error(SampleID)	38	1.23
FCN1	ENSG00000085265	Inflammation_II	O00602	OID30690	NPC1	0.0886663	0.0598611	0.143797	Non-significant	0.791315	0.669073	NPX ~ NPC1 * Age_c + Sex + Error(SampleID)	39	1.08
DEFB103A_DEFB103B		Inflammation_II	P81534	OID30534	NPC1:Age_c	0.198907	0.00347191	0.143959	Non-significant	0.300827	-0.0770417	NPX ~ NPC1 * Age_c + Sex + Error(SampleID)		0.71
NRP2	ENSG00000118257	Neurology	O60462	OID21081	Age_c	0.152377	0.0116295	0.144035	Non-significant	0.588948	-0.0301975	NPX ~ NPC1 * Age_c + Sex + Error(SampleID)		0.15
CFB	ENSG00000243649	Inflammation_II	P00751	OID30755	NPC1	0.0893968	0.0601259	0.144312	Non-significant	-0.304571	-0.261542	NPX ~ NPC1 * Age_c + Sex + Error(SampleID)	39	0.17
VASH1	ENSG00000071246	Inflammation	Q7L8A9	OID20516	Age_c	0.159626	0.0117415	0.144795	Non-significant	-0.154632	-0.0199598	NPX ~ NPC1 * Age_c + Sex + Error(SampleID)		0.07
PAFAH1B3	ENSG00000079462	Neurology_II	Q15102	OID30998	NPC1	0.0882106	0.0603996	0.144823	Non-significant	1.15241	1.05015	NPX ~ NPC1 * Age_c + Sex + Error(SampleID)	39	2.68
OMG	ENSG00000126861	Oncology	P23515	OID21352	NPC1	0.0919681	0.0604399	0.144823	Non-significant	0.63178	0.534639	NPX ~ NPC1 * Age_c + Sex + Error(SampleID)	37	0.66
MELTF	ENSG00000163975	Cardiometabolic_II	P08582	OID30347	Age_c	0.155239	0.0118842	0.145303	Non-significant	-0.0939522	-0.0345517	NPX ~ NPC1 * Age_c + Sex + Error(SampleID)		0.20
GOLM2	ENSG00000166734	Neurology	Q6P4E1	OID21044	Age_c	0.151618	0.0118578	0.145303	Non-significant	-0.274392	-0.025483	NPX ~ NPC1 * Age_c + Sex + Error(SampleID)		0.11
IL1RL2	ENSG00000115598	Inflammation	Q9HB29	OID20487	NPC1	0.0943563	0.060691	0.145303	Non-significant	-0.347122	-0.372992	NPX ~ NPC1 * Age_c + Sex + Error(SampleID)	36	0.27
ATP5IF1	ENSG00000130770	Inflammation	Q9UII2	OID20760	NPC1	0.0902608	0.0608068	0.145458	Non-significant	-1.14063	-0.85789	NPX ~ NPC1 * Age_c + Sex + Error(SampleID)	39	1.80
SRPX	ENSG00000101955	Cardiometabolic_II	P78539	OID30310	NPC1	0.0956976	0.0608787	0.145509	Non-significant	0.632303	0.531726	NPX ~ NPC1 * Age_c + Sex + Error(SampleID)	38	0.66
MOG	ENSG00000204655	Oncology	Q16653	OID21384	Sex	0.234954	0.00152588	0.145518	Non-significant	0.470094	-0.217397	NPX ~ NPC1 * Age_c + Sex + Error(SampleID)		0.16
BAG4	ENSG00000156735	Inflammation_II	O95429	OID30474	NPC1	0.0897516	0.0610142	0.145711	Non-significant	-0.885625	-0.731933	NPX ~ NPC1 * Age_c + Sex + Error(SampleID)	39	1.31
PVR	ENSG00000073008	Neurology	P15151	OID21011	NPC1	0.0866032	0.061125	0.145854	Non-significant	0.211844	0.33889	NPX ~ NPC1 * Age_c + Sex + Error(SampleID)	39	0.28
TMCO5A	ENSG00000166069	Neurology_II	Q8N6Q1	OID30940	NPC1	0.102514	0.0614347	0.146471	Non-significant	0.978553	1.38695	NPX ~ NPC1 * Age_c + Sex + Error(SampleID)	35	4.17
GRP	ENSG00000134443	Cardiometabolic_II	P07492	OID30264	Age_c	0.154107	0.012226	0.14654	Non-significant	0.653991	-0.114055	NPX ~ NPC1 * Age_c + Sex + Error(SampleID)		2.03
PAEP	ENSG00000122133	Neurology	P09466	OID20925	Age_c	0.154332	0.0121574	0.14654	Non-significant	-0.032055	0.0986592	NPX ~ NPC1 * Age_c + Sex + Error(SampleID)		1.61
VWC2L	ENSG00000174453	Neurology_II	B2RUY7	OID31002	Age_c	0.150374	0.0122415	0.14654	Non-significant	0.515686	-0.0745344	NPX ~ NPC1 * Age_c + Sex + Error(SampleID)		0.93
SH2D1A	ENSG00000183918	Inflammation	O60880	OID20514	Age_c	0.158242	0.0121462	0.14654	Non-significant	-0.60215	-0.0709987	NPX ~ NPC1 * Age_c + Sex + Error(SampleID)		0.83
EPHA2	ENSG00000142627	Oncology	P29317	OID21342	Age_c	0.15793	0.0122393	0.14654	Non-significant	0.258012	-0.0433206	NPX ~ NPC1 * Age_c + Sex + Error(SampleID)		0.31
PROCR	ENSG00000101000	Cardiometabolic_II	Q9UNN8	OID30149	NPC1	0.0882409	0.0616798	0.146932	Non-significant	0.455653	0.440286	NPX ~ NPC1 * Age_c + Sex + Error(SampleID)	39	0.48
MYL6B	ENSG00000196465	Neurology_II	P14649	OID30936	NPC1	0.0886288	0.0617465	0.146969	Non-significant	1.49431	1.15011	NPX ~ NPC1 * Age_c + Sex + Error(SampleID)	35	2.88
HJV	ENSG00000168509	Neurology_II	Q6ZVN8	OID31006	NPC1	0.0875931	0.0620663	0.147607	Non-significant	0.585929	0.510801	NPX ~ NPC1 * Age_c + Sex + Error(SampleID)	39	0.64
FAM3D	ENSG00000198643	Oncology_II	Q96BQ1	OID31514	Sex	0.226701	0.00165141	0.147647	Non-significant	0.241002	-0.376573	NPX ~ NPC1 * Age_c + Sex + Error(SampleID)		0.52
CNTNAP2	ENSG00000174469	Inflammation	Q9UHC6	OID20556	Sex	0.237575	0.00164862	0.147647	Non-significant	1.16949	-0.350316	NPX ~ NPC1 * Age_c + Sex + Error(SampleID)		0.42
CALCOCO2	ENSG00000136436	Cardiometabolic_II	Q13137	OID30249	NPC1	0.0900919	0.0621372	0.147653	Non-significant	-1.10336	-0.796534	NPX ~ NPC1 * Age_c + Sex + Error(SampleID)	38	1.49
OXCT1	ENSG00000083720	Cardiometabolic_II	P55809	OID30227	Age_c	0.153067	0.0125482	0.147738	Non-significant	0.0554314	-0.0611503	NPX ~ NPC1 * Age_c + Sex + Error(SampleID)		0.59
TPM3	ENSG00000143549	Cardiometabolic_II	P06753	OID30058	Age_c	0.149487	0.0125223	0.147738	Non-significant	0.142815	0.0603539	NPX ~ NPC1 * Age_c + Sex + Error(SampleID)		0.61
IMPA1	ENSG00000133731	Neurology	P29218	OID20907	Age_c	0.153182	0.0125122	0.147738	Non-significant	0.123955	-0.0548541	NPX ~ NPC1 * Age_c + Sex + Error(SampleID)		0.50
LRP1	ENSG00000123384	Oncology	Q07954	OID21293	Age_c	0.157211	0.0124565	0.147738	Non-significant	0.0135018	-0.0215118	NPX ~ NPC1 * Age_c + Sex + Error(SampleID)		0.08
CIT	ENSG00000122966	Neurology_II	O14578	OID30970	NPC1	0.0975782	0.0623311	0.147991	Non-significant	0.750818	0.893795	NPX ~ NPC1 * Age_c + Sex + Error(SampleID)	35	1.75
NGFR	ENSG00000064300	Cardiometabolic_II	P08138	OID30300	NPC1	0.0921882	0.0624287	0.1481	Non-significant	0.437323	0.493248	NPX ~ NPC1 * Age_c + Sex + Error(SampleID)	38	0.57
IFI30	ENSG00000216490	Oncology_II	P13284	OID31505	Age_c	0.148965	0.0126905	0.148802	Non-significant	0.50286	-0.0743374	NPX ~ NPC1 * Age_c + Sex + Error(SampleID)		0.93
ALDH2	ENSG00000111275	Oncology_II	P05091	OID31380	NPC1	0.086856	0.0628851	0.149059	Non-significant	0.680209	0.722489	NPX ~ NPC1 * Age_c + Sex + Error(SampleID)	39	1.30
DCLRE1C	ENSG00000152457	Oncology_II	Q96SD1	OID31240	NPC1	0.0850569	0.0629457	0.149079	Non-significant	0.483924	0.598761	NPX ~ NPC1 * Age_c + Sex + Error(SampleID)	39	0.89
GSTM4	ENSG00000168765	Cardiometabolic_II	Q03013	OID30164	NPC1	0.0861631	0.063332	0.14987	Non-significant	0.675243	0.712097	NPX ~ NPC1 * Age_c + Sex + Error(SampleID)	39	1.26
GPC1	ENSG00000063660	Oncology	P35052	OID21438	Age_c	0.152141	0.0128422	0.149966	Non-significant	-0.455756	-0.028842	NPX ~ NPC1 * Age_c + Sex + Error(SampleID)		0.14
CBLN1	ENSG00000102924	Neurology_II	P23435	OID30851	NPC1	0.0866271	0.0634506	0.150027	Non-significant	1.13899	1.60334	NPX ~ NPC1 * Age_c + Sex + Error(SampleID)	38	6.28
BMP4	ENSG00000125378	Neurology	P12644	OID20994	NPC1	0.0860547	0.063616	0.150294	Non-significant	0.430022	0.467315	NPX ~ NPC1 * Age_c + Sex + Error(SampleID)	38	0.55
HDGFL2	ENSG00000167674	Neurology_II	Q7Z4V5	OID31136	NPC1	0.0875051	0.0639199	0.150887	Non-significant	-0.756062	-0.64703	NPX ~ NPC1 * Age_c + Sex + Error(SampleID)	39	1.05
SLK	ENSG00000065613	Oncology_II	Q9H2G2	OID31282	Age_c	0.155374	0.0130287	0.150912	Non-significant	-3.09721	-0.206544	NPX ~ NPC1 * Age_c + Sex + Error(SampleID)		6.77
PHOSPHO1	ENSG00000173868	Neurology	Q8TCT1	OID20922	Age_c	0.151673	0.0129935	0.150912	Non-significant	-0.371505	0.0284241	NPX ~ NPC1 * Age_c + Sex + Error(SampleID)		0.14
CD300LG	ENSG00000161649	Neurology	Q6UXG3	OID21130	NPC1	0.0855884	0.0641766	0.151368	Non-significant	-0.113392	-0.194094	NPX ~ NPC1 * Age_c + Sex + Error(SampleID)	39	0.09
LACTB2	ENSG00000147592	Cardiometabolic	Q53H82	OID20150	NPC1	0.0870969	0.0645453	0.152112	Non-significant	-0.888136	-0.721094	NPX ~ NPC1 * Age_c + Sex + Error(SampleID)	39	1.31
CEACAM18	ENSG00000213822	Oncology_II	A8MTB9	OID31251	NPC1	0.0872961	0.0646396	0.152209	Non-significant	0.980978	1.36142	NPX ~ NPC1 * Age_c + Sex + Error(SampleID)	37	4.52
GAL	ENSG00000069482	Inflammation	P22466	OID20727	Age_c	0.147398	0.0132091	0.152384	Non-significant	-0.404873	0.0666784	NPX ~ NPC1 * Age_c + Sex + Error(SampleID)		0.76
KIRREL1	ENSG00000183853	Neurology_II	Q96J84	OID30806	NPC1	0.0889068	0.0651642	0.153318	Non-significant	0.630345	0.639072	NPX ~ NPC1 * Age_c + Sex + Error(SampleID)	38	1.01
EDF1	ENSG00000107223	Neurology_II	O60869	OID31010	NPC1	0.0875187	0.0653098	0.153534	Non-significant	-1.46727	-1.03667	NPX ~ NPC1 * Age_c + Sex + Error(SampleID)	39	2.72
FGD3	ENSG00000127084	Neurology_II	Q5JSP0	OID31040	NPC1	0.0864241	0.0658155	0.154469	Non-significant	-1.29806	-1.0657	NPX ~ NPC1 * Age_c + Sex + Error(SampleID)	39	2.89
CSF2	ENSG00000164400	Cardiometabolic_II	P04141	OID30072	NPC1	0.0863324	0.0658123	0.154469	Non-significant	0.644546	0.522891	NPX ~ NPC1 * Age_c + Sex + Error(SampleID)	39	0.69
GCG	ENSG00000115263	Oncology	P01275	OID21263	NPC1:Age_c	0.20963	0.00384702	0.155019	Non-significant	-0.11054	0.114654	NPX ~ NPC1 * Age_c + Sex + Error(SampleID)		1.32
S100P	ENSG00000163993	Cardiometabolic	P25815	OID20103	NPC1:Age_c	0.233227	0.00381618	0.155019	Non-significant	-0.600774	0.0899159	NPX ~ NPC1 * Age_c + Sex + Error(SampleID)		0.65
PNMA2	ENSG00000240694	Neurology_II	Q9UL42	OID30842	NPC1	0.0808274	0.0663606	0.155581	Non-significant	0.827123	1.2625	NPX ~ NPC1 * Age_c + Sex + Error(SampleID)	38	3.98
ARHGAP1	ENSG00000175220	Oncology	Q07960	OID21202	NPC1	0.0903965	0.0663979	0.155581	Non-significant	0.513739	0.434621	NPX ~ NPC1 * Age_c + Sex + Error(SampleID)	36	0.45
HLA-E	ENSG00000204592	Inflammation	P13747	OID20532	NPC1	0.0767726	0.0664681	0.155618	Non-significant	0.16508	0.143785	NPX ~ NPC1 * Age_c + Sex + Error(SampleID)	37	0.06
UBXN1	ENSG00000162191	Inflammation_II	Q04323	OID30654	NPC1	0.0841132	0.0665326	0.155642	Non-significant	0.90312	0.852972	NPX ~ NPC1 * Age_c + Sex + Error(SampleID)	39	1.86
BAG6	ENSG00000204463	Cardiometabolic	P46379	OID20114	NPC1	0.0810596	0.0667081	0.155925	Non-significant	-0.521923	-0.483278	NPX ~ NPC1 * Age_c + Sex + Error(SampleID)	32	0.53
TRAF3IP2	ENSG00000056972	Cardiometabolic_II	O43734	OID30054	NPC1	0.0816559	0.0668478	0.156124	Non-significant	0.530536	0.650329	NPX ~ NPC1 * Age_c + Sex + Error(SampleID)	39	1.08
ALPP	ENSG00000163283	Oncology	P05187	OID21383	Sex	0.230637	0.00197378	0.156607	Non-significant	-0.0564691	-0.473655	NPX ~ NPC1 * Age_c + Sex + Error(SampleID)		0.79
VGF	ENSG00000128564	Neurology_II	O15240	OID31067	Sex	0.220032	0.00197708	0.156607	Non-significant	0.335417	-0.326031	NPX ~ NPC1 * Age_c + Sex + Error(SampleID)		0.40
SLITRK1	ENSG00000178235	Inflammation_II	Q96PX8	OID30510	Sex	0.220417	0.00195669	0.156607	Non-significant	0.325596	-0.317064	NPX ~ NPC1 * Age_c + Sex + Error(SampleID)		0.38
OPTC	ENSG00000188770	Oncology	Q9UBM4	OID21362	Sex	0.229639	0.00202533	0.156607	Non-significant	0.418969	-0.269717	NPX ~ NPC1 * Age_c + Sex + Error(SampleID)		0.26
CD99	ENSG00000002586	Neurology	P14209	OID21110	Sex	0.223263	0.00181221	0.156607	Non-significant	-0.437351	0.13924	NPX ~ NPC1 * Age_c + Sex + Error(SampleID)		0.07
MFGE8	ENSG00000140545	Neurology	Q08431	OID21134	NPC1	0.0842802	0.0672967	0.157044	Non-significant	0.346537	0.360244	NPX ~ NPC1 * Age_c + Sex + Error(SampleID)	39	0.33
EHD3	ENSG00000013016	Cardiometabolic_II	Q9NZN3	OID30229	Age_c	0.149161	0.0138348	0.158325	Non-significant	-2.25723	-0.118305	NPX ~ NPC1 * Age_c + Sex + Error(SampleID)		2.27
CDH15	ENSG00000129910	Neurology	P55291	OID21005	Age_c	0.145736	0.0137818	0.158325	Non-significant	0.112241	-0.0465819	NPX ~ NPC1 * Age_c + Sex + Error(SampleID)		0.38
CLTA	ENSG00000122705	Cardiometabolic	P09496	OID20118	NPC1	0.080661	0.068292	0.159237	Non-significant	-0.576181	-0.496644	NPX ~ NPC1 * Age_c + Sex + Error(SampleID)	32	0.56
LXN	ENSG00000079257	Neurology	Q9BS40	OID21003	NPC1	0.0835919	0.0683929	0.159342	Non-significant	0.462225	0.461237	NPX ~ NPC1 * Age_c + Sex + Error(SampleID)	38	0.56
PRKAR1A	ENSG00000108946	Cardiometabolic	P10644	OID20146	NPC1	0.08486	0.0684998	0.159461	Non-significant	-0.957218	-0.811828	NPX ~ NPC1 * Age_c + Sex + Error(SampleID)	39	1.71
PTPRF	ENSG00000142949	Cardiometabolic	P10586	OID20310	NPC1	0.0824484	0.0686364	0.159649	Non-significant	-0.176817	-0.217987	NPX ~ NPC1 * Age_c + Sex + Error(SampleID)	39	0.12
CPB2	ENSG00000080618	Inflammation_II	Q96IY4	OID30734	NPC1	0.0821378	0.0688429	0.16	Non-significant	-0.303459	-0.371444	NPX ~ NPC1 * Age_c + Sex + Error(SampleID)	39	0.36
ODAM	ENSG00000109205	Neurology	A1E959	OID20793	Sex	0.234865	0.00236821	0.160264	Non-significant	0.761296	-0.576708	NPX ~ NPC1 * Age_c + Sex + Error(SampleID)		1.16
DEFB4A_DEFB4B		Oncology	O15263	OID21373	Sex	0.222908	0.00240872	0.160264	Non-significant	0.785282	0.565949	NPX ~ NPC1 * Age_c + Sex + Error(SampleID)		1.18
GFAP	ENSG00000131095	Oncology	P14136	OID21247	Sex	0.228695	0.00239117	0.160264	Non-significant	1.19931	-0.361347	NPX ~ NPC1 * Age_c + Sex + Error(SampleID)		0.47
FOLR1	ENSG00000110195	Oncology	P15328	OID21529	Sex	0.214563	0.00228958	0.160264	Non-significant	0.196261	-0.171782	NPX ~ NPC1 * Age_c + Sex + Error(SampleID)		0.12
SPON1	ENSG00000262655	Inflammation	Q9HCB6	OID20759	Sex	0.214979	0.00226426	0.160264	Non-significant	0.108817	-0.159475	NPX ~ NPC1 * Age_c + Sex + Error(SampleID)		0.10
CRTAC1	ENSG00000095713	Cardiometabolic	Q9NQ79	OID20279	Sex	0.21632	0.00218434	0.160264	Non-significant	-0.293561	-0.135105	NPX ~ NPC1 * Age_c + Sex + Error(SampleID)		0.07
PADI2	ENSG00000117115	Inflammation	Q9Y2J8	OID20467	NPC1	0.0888382	0.0691256	0.160488	Non-significant	-0.362828	-0.698898	NPX ~ NPC1 * Age_c + Sex + Error(SampleID)	36	1.03
ANGPTL3	ENSG00000132855	Cardiometabolic	Q9Y5C1	OID20407	NPC1	0.0815294	0.0691653	0.160488	Non-significant	0.203119	0.241832	NPX ~ NPC1 * Age_c + Sex + Error(SampleID)	39	0.15
CAPN3	ENSG00000092529	Oncology_II	P20807	OID31384	NPC1	0.0839072	0.0692547	0.160565	Non-significant	0.44431	0.443447	NPX ~ NPC1 * Age_c + Sex + Error(SampleID)	39	0.51
S100P	ENSG00000163993	Cardiometabolic	P25815	OID20103	Age_c	0.174076	0.0140909	0.160613	Non-significant	-0.600774	-0.0748939	NPX ~ NPC1 * Age_c + Sex + Error(SampleID)		0.65
KLK3	ENSG00000142515	Cardiometabolic_II	P07288	OID30364	NPC1:Age_c	0.193003	0.0040564	0.161186	Non-significant	0.141923	-0.0700416	NPX ~ NPC1 * Age_c + Sex + Error(SampleID)		0.61
THRAP3	ENSG00000054118	Cardiometabolic_II	Q9Y2W1	OID30053	Age_c	0.144552	0.0142047	0.161269	Non-significant	-0.243965	-0.111846	NPX ~ NPC1 * Age_c + Sex + Error(SampleID)		2.18
COMMD9	ENSG00000110442	Oncology_II	Q9P000	OID31390	NPC1	0.0845493	0.0696697	0.161397	Non-significant	-0.638287	-0.473081	NPX ~ NPC1 * Age_c + Sex + Error(SampleID)	39	0.59
BTC	ENSG00000174808	Oncology	P35070	OID21199	NPC1	0.0879752	0.0700149	0.161966	Non-significant	-1.49805	-1.0672	NPX ~ NPC1 * Age_c + Sex + Error(SampleID)	36	2.78
AGER	ENSG00000204305	Inflammation	Q15109	OID20756	NPC1	0.0801696	0.0700288	0.161966	Non-significant	0.138024	0.276999	NPX ~ NPC1 * Age_c + Sex + Error(SampleID)	39	0.20
COLEC12	ENSG00000158270	Inflammation	Q5KU26	OID20738	Age_c	0.143927	0.0144331	0.163214	Non-significant	0.236838	-0.0270645	NPX ~ NPC1 * Age_c + Sex + Error(SampleID)		0.13
RNF5	ENSG00000204308	Cardiometabolic_II	Q99942	OID30218	NPC1	0.0848012	0.0707194	0.163432	Non-significant	-0.867261	-0.655863	NPX ~ NPC1 * Age_c + Sex + Error(SampleID)	38	1.08
PAG1	ENSG00000076641	Cardiometabolic	Q9NWQ8	OID20108	Age_c	0.172619	0.0145417	0.16356	Non-significant	-1.60908	-0.0996942	NPX ~ NPC1 * Age_c + Sex + Error(SampleID)		1.17
SCGB3A2	ENSG00000164265	Inflammation	Q96PL1	OID20723	Age_c	0.143535	0.014578	0.16356	Non-significant	0.309744	-0.0696061	NPX ~ NPC1 * Age_c + Sex + Error(SampleID)		0.85
IMMT	ENSG00000132305	Oncology_II	Q16891	OID31397	NPC1	0.0799291	0.0711386	0.164268	Non-significant	0.234404	0.41423	NPX ~ NPC1 * Age_c + Sex + Error(SampleID)	39	0.45
CDHR5	ENSG00000099834	Cardiometabolic	Q9HBB8	OID20193	Age_c	0.143048	0.0147603	0.164416	Non-significant	-0.02864	0.0259893	NPX ~ NPC1 * Age_c + Sex + Error(SampleID)		0.12
LAMB1	ENSG00000091136	Cardiometabolic_II	P07942	OID30280	Age_c	0.146542	0.0147693	0.164416	Non-significant	0.00507018	-0.0253028	NPX ~ NPC1 * Age_c + Sex + Error(SampleID)		0.11
CEACAM5	ENSG00000105388	Oncology	P06731	OID21171	Age_c	0.153673	0.0149285	0.164673	Non-significant	0.834033	0.0716845	NPX ~ NPC1 * Age_c + Sex + Error(SampleID)		0.76
VSIG4	ENSG00000155659	Neurology	Q9Y279	OID21144	Age_c	0.142507	0.0149651	0.164673	Non-significant	0.0733925	0.0508886	NPX ~ NPC1 * Age_c + Sex + Error(SampleID)		0.46
INHBC	ENSG00000175189	Neurology	P55103	OID21093	Age_c	0.142756	0.0148706	0.164673	Non-significant	0.107877	0.029136	NPX ~ NPC1 * Age_c + Sex + Error(SampleID)		0.15
MGMT	ENSG00000170430	Inflammation	P16455	OID20588	NPC1	0.0740471	0.0714818	0.164927	Non-significant	-0.839889	-0.85364	NPX ~ NPC1 * Age_c + Sex + Error(SampleID)	37	2.03
SUMF2	ENSG00000129103	Neurology	Q8NBJ7	OID21032	Age_c	0.142295	0.0150461	0.164931	Non-significant	-0.166988	-0.025404	NPX ~ NPC1 * Age_c + Sex + Error(SampleID)		0.11
APOA4	ENSG00000110244	Inflammation_II	P06727	OID30733	NPC1	0.0817076	0.0718699	0.165689	Non-significant	-0.527179	-0.507408	NPX ~ NPC1 * Age_c + Sex + Error(SampleID)	39	0.68
GLYR1	ENSG00000140632	Oncology_II	Q49A26	OID31364	NPC1	0.0829919	0.0719666	0.165745	Non-significant	-0.984935	-0.787505	NPX ~ NPC1 * Age_c + Sex + Error(SampleID)	39	1.65
PDE5A	ENSG00000138735	Inflammation_II	O76074	OID30584	NPC1	0.081457	0.0720099	0.165745	Non-significant	-0.596493	-0.661347	NPX ~ NPC1 * Age_c + Sex + Error(SampleID)	39	1.16
CXCL8	ENSG00000169429	Cardiometabolic	P10145	OID20153	Age_c	0.141427	0.0153829	0.167979	Non-significant	-3.79599	-0.123886	NPX ~ NPC1 * Age_c + Sex + Error(SampleID)		2.75
ATRAID	ENSG00000138085	Oncology_II	Q6UW56	OID31451	NPC1	0.0803418	0.0731044	0.168128	Non-significant	0.221568	0.210912	NPX ~ NPC1 * Age_c + Sex + Error(SampleID)	39	0.12
ITGAM	ENSG00000169896	Neurology	P11215	OID21071	NPC1:Age_c	0.190828	0.00429504	0.16833	Non-significant	-0.558353	0.0374897	NPX ~ NPC1 * Age_c + Sex + Error(SampleID)		0.18
CD46	ENSG00000117335	Cardiometabolic	P15529	OID20380	NPC1	0.0820867	0.0734485	0.168784	Non-significant	-0.32212	-0.258929	NPX ~ NPC1 * Age_c + Sex + Error(SampleID)	39	0.18
C1QTNF5	ENSG00000223953	Inflammation_II	Q9BXJ0	OID30618	NPC1	0.0806226	0.0736601	0.169135	Non-significant	0.261519	0.254425	NPX ~ NPC1 * Age_c + Sex + Error(SampleID)	39	0.17
THTPA	ENSG00000259431	Oncology_II	Q9BU02	OID31375	NPC1	0.0819368	0.0737878	0.169174	Non-significant	-1.18644	-1.05662	NPX ~ NPC1 * Age_c + Sex + Error(SampleID)	39	3.01
SIRT5	ENSG00000124523	Neurology	Q9NXA8	OID20820	NPC1	0.0901079	0.0737958	0.169174	Non-significant	-0.679571	-0.504947	NPX ~ NPC1 * Age_c + Sex + Error(SampleID)	35	0.59
CDH22	ENSG00000149654	Oncology_II	Q9UJ99	OID31332	NPC1	0.0823167	0.0739571	0.169273	Non-significant	0.530373	0.496723	NPX ~ NPC1 * Age_c + Sex + Error(SampleID)	37	0.65
CEACAM1	ENSG00000079385	Oncology	P13688	OID21528	NPC1	0.0805933	0.0739055	0.169273	Non-significant	0.144414	0.196776	NPX ~ NPC1 * Age_c + Sex + Error(SampleID)	39	0.10
BCL2L15	ENSG00000188761	Inflammation_II	Q5TBC7	OID30498	NPC1	0.0817371	0.0741868	0.169663	Non-significant	-1.36418	-1.11812	NPX ~ NPC1 * Age_c + Sex + Error(SampleID)	39	3.38
DTNB	ENSG00000138101	Oncology_II	O60941	OID31395	NPC1	0.080349	0.0743772	0.169963	Non-significant	-0.472677	-0.440666	NPX ~ NPC1 * Age_c + Sex + Error(SampleID)	39	0.53
HIP1	ENSG00000127946	Cardiometabolic_II	O00291	OID30071	NPC1	0.0806881	0.0746415	0.17043	Non-significant	-0.538929	-0.510831	NPX ~ NPC1 * Age_c + Sex + Error(SampleID)	39	0.71
PMCH	ENSG00000183395	Cardiometabolic_II	P20382	OID30172	NPC1	0.0781437	0.0748433	0.170755	Non-significant	0.227052	0.294491	NPX ~ NPC1 * Age_c + Sex + Error(SampleID)	39	0.24
C8B	ENSG00000021852	Inflammation_II	P07358	OID30719	NPC1	0.0806842	0.0750415	0.171071	Non-significant	-0.25234	-0.202744	NPX ~ NPC1 * Age_c + Sex + Error(SampleID)	39	0.11
PPM1B	ENSG00000138032	Inflammation_II	O75688	OID30548	NPC1	0.0815462	0.0751875	0.171267	Non-significant	-1.14589	-0.927371	NPX ~ NPC1 * Age_c + Sex + Error(SampleID)	39	2.34
AP3B1	ENSG00000132842	Oncology_II	O00203	OID31478	NPC1	0.0819844	0.0753437	0.171486	Non-significant	-1.47227	-1.00666	NPX ~ NPC1 * Age_c + Sex + Error(SampleID)	39	2.76
LY96	ENSG00000154589	Neurology	Q9Y6Y9	OID20945	NPC1	0.0766943	0.0756121	0.17196	Non-significant	0.246734	0.207242	NPX ~ NPC1 * Age_c + Sex + Error(SampleID)	38	0.12
IL2RB	ENSG00000100385	Inflammation	P14784	OID20450	NPC1	0.0850625	0.0756724	0.171961	Non-significant	0.735787	0.583281	NPX ~ NPC1 * Age_c + Sex + Error(SampleID)	36	0.75
SDHB	ENSG00000117118	Oncology_II	P21912	OID31436	NPC1	0.0783905	0.0757741	0.172055	Non-significant	0.559027	0.638407	NPX ~ NPC1 * Age_c + Sex + Error(SampleID)	39	1.11
TSC22D1	ENSG00000102804	Neurology_II	Q15714	OID31016	NPC1	0.0780037	0.0763119	0.173139	Non-significant	0.787569	0.864622	NPX ~ NPC1 * Age_c + Sex + Error(SampleID)	39	2.05
SLK	ENSG00000065613	Oncology_II	Q9H2G2	OID31282	NPC1:Age_c	0.197838	0.00455288	0.173589	Non-significant	-3.09721	0.238723	NPX ~ NPC1 * Age_c + Sex + Error(SampleID)		6.77
SCARB1	ENSG00000073060	Neurology	Q8WTV0	OID20805	NPC1:Age_c	0.207332	0.00462838	0.173589	Non-significant	-0.0482247	0.133965	NPX ~ NPC1 * Age_c + Sex + Error(SampleID)		1.98
OBP2B	ENSG00000171102	Neurology	Q9NPH6	OID20980	NPC1:Age_c	0.192107	0.0046717	0.173589	Non-significant	-0.481557	-0.0848497	NPX ~ NPC1 * Age_c + Sex + Error(SampleID)		0.92
OXT	ENSG00000101405	Neurology	P01178	OID21047	NPC1:Age_c	0.186307	0.00483517	0.173589	Non-significant	0.406397	-0.0804398	NPX ~ NPC1 * Age_c + Sex + Error(SampleID)		0.84
KIAA0319	ENSG00000137261	Neurology_II	Q5VV43	OID31094	NPC1:Age_c	0.186504	0.0048103	0.173589	Non-significant	0.681706	0.0467993	NPX ~ NPC1 * Age_c + Sex + Error(SampleID)		0.28
ENPP6	ENSG00000164303	Cardiometabolic_II	Q6UWR7	OID30273	NPC1:Age_c	0.19013	0.00491462	0.173589	Non-significant	-0.504036	0.0399415	NPX ~ NPC1 * Age_c + Sex + Error(SampleID)		0.19
SEZ6L2	ENSG00000174938	Oncology	Q6UXD5	OID21289	NPC1:Age_c	0.195112	0.00487533	0.173589	Non-significant	0.149486	0.0302308	NPX ~ NPC1 * Age_c + Sex + Error(SampleID)		0.12
SERPINF1	ENSG00000132386	Inflammation_II	P36955	OID30757	NPC1:Age_c	0.186303	0.00483569	0.173589	Non-significant	-0.0699775	-0.0162942	NPX ~ NPC1 * Age_c + Sex + Error(SampleID)		0.03
CIRBP	ENSG00000099622	Oncology_II	Q14011	OID31503	NPC1	0.0807042	0.0766137	0.173686	Non-significant	-1.60019	-1.19093	NPX ~ NPC1 * Age_c + Sex + Error(SampleID)	39	3.90
PIKFYVE	ENSG00000115020	Inflammation_II	Q9Y2I7	OID30465	NPC1	0.0804253	0.0767097	0.173696	Non-significant	-0.695254	-0.585168	NPX ~ NPC1 * Age_c + Sex + Error(SampleID)	39	0.94
PTPRB	ENSG00000127329	Cardiometabolic_II	P23467	OID30324	NPC1	0.0803638	0.0767397	0.173696	Non-significant	0.21069	0.290162	NPX ~ NPC1 * Age_c + Sex + Error(SampleID)	38	0.22
CDA	ENSG00000158825	Cardiometabolic_II	P32320	OID30345	NPC1	0.0914082	0.0771443	0.174474	Non-significant	-0.59591	-0.459288	NPX ~ NPC1 * Age_c + Sex + Error(SampleID)	38	0.55
SUSD2	ENSG00000099994	Neurology	Q9UGT4	OID21098	Age_c	0.139725	0.0160644	0.174753	Non-significant	-0.07399	0.0249298	NPX ~ NPC1 * Age_c + Sex + Error(SampleID)		0.11
PLCB1	ENSG00000182621	Inflammation_II	Q9NQ66	OID30484	NPC1	0.0777624	0.0776146	0.175399	Non-significant	0.268029	0.303894	NPX ~ NPC1 * Age_c + Sex + Error(SampleID)	39	0.26
CCL26	ENSG00000006606	Inflammation	Q9Y258	OID20546	NPC1	0.0945774	0.0777409	0.175498	Non-significant	-0.642169	-0.711132	NPX ~ NPC1 * Age_c + Sex + Error(SampleID)	37	1.47
HAVCR1	ENSG00000113249	Oncology	Q96D42	OID21422	NPC1	0.0750297	0.077781	0.175498	Non-significant	0.709579	0.618233	NPX ~ NPC1 * Age_c + Sex + Error(SampleID)	38	1.07
CDON	ENSG00000064309	Inflammation	Q4KMG0	OID20754	NPC1	0.0766434	0.0780255	0.175911	Non-significant	-0.274156	-0.284495	NPX ~ NPC1 * Age_c + Sex + Error(SampleID)	39	0.22
CRLF1	ENSG00000006016	Inflammation	O75462	OID20699	NPC1:Age_c	0.184702	0.00504243	0.175932	Non-significant	0.278728	-0.0297733	NPX ~ NPC1 * Age_c + Sex + Error(SampleID)		0.12
ACTA2	ENSG00000107796	Cardiometabolic	P62736	OID20079	Age_c	0.167501	0.0162389	0.175983	Non-significant	0.0567567	0.0346997	NPX ~ NPC1 * Age_c + Sex + Error(SampleID)		0.15
ABHD14B	ENSG00000114779	Neurology	Q96IU4	OID20921	NPC1	0.0736966	0.078388	0.176193	Non-significant	-0.963204	-0.818036	NPX ~ NPC1 * Age_c + Sex + Error(SampleID)	38	1.88
GASK1A	ENSG00000144649	Cardiometabolic_II	Q9UFP1	OID30109	NPC1	0.0757556	0.0783351	0.176193	Non-significant	-0.180237	-0.520948	NPX ~ NPC1 * Age_c + Sex + Error(SampleID)	39	0.76
FCRL5	ENSG00000143297	Neurology	Q96RD9	OID21111	NPC1	0.0805949	0.0782961	0.176193	Non-significant	0.542117	0.395632	NPX ~ NPC1 * Age_c + Sex + Error(SampleID)	39	0.44
IGSF8	ENSG00000162729	Cardiometabolic	Q969P0	OID20167	NPC1	0.0747162	0.0783967	0.176193	Non-significant	0.0769608	0.198844	NPX ~ NPC1 * Age_c + Sex + Error(SampleID)	39	0.11
CFHR4	ENSG00000134365	Inflammation_II	Q92496	OID30758	NPC1	0.0775338	0.0785824	0.176471	Non-significant	-0.244537	-0.300059	NPX ~ NPC1 * Age_c + Sex + Error(SampleID)	39	0.25
FGF21	ENSG00000105550	Oncology	Q9NSA1	OID21402	Age_c	0.142398	0.016376	0.176799	Non-significant	0.492762	0.102177	NPX ~ NPC1 * Age_c + Sex + Error(SampleID)		1.90
CXCL8	ENSG00000169429	Neurology	P10145	OID20997	Age_c	0.14189	0.0165843	0.176934	Non-significant	-3.75734	-0.123841	NPX ~ NPC1 * Age_c + Sex + Error(SampleID)		2.81
PPP1CC	ENSG00000186298	Oncology_II	P36873	OID31360	Age_c	0.138324	0.0166478	0.176934	Non-significant	-1.45059	-0.084321	NPX ~ NPC1 * Age_c + Sex + Error(SampleID)		1.31
KLHL41	ENSG00000239474	Neurology_II	O60662	OID30986	Age_c	0.138206	0.0166978	0.176934	Non-significant	0.004155	0.0700327	NPX ~ NPC1 * Age_c + Sex + Error(SampleID)		0.90
IL12B	ENSG00000113302	Inflammation	P29460	OID20666	Age_c	0.145634	0.0165214	0.176934	Non-significant	0.71909	-0.0540748	NPX ~ NPC1 * Age_c + Sex + Error(SampleID)		0.45
NPHS1	ENSG00000161270	Inflammation_II	O60500	OID30540	Age_c	0.138583	0.0165382	0.176934	Non-significant	-0.0611733	-0.027022	NPX ~ NPC1 * Age_c + Sex + Error(SampleID)		0.13
RALB	ENSG00000144118	Inflammation_II	P11234	OID30567	Age_c	0.137981	0.0167936	0.177293	Non-significant	-1.89695	-0.100051	NPX ~ NPC1 * Age_c + Sex + Error(SampleID)		1.85
METAP1	ENSG00000164024	Neurology	P53582	OID20815	NPC1	0.087354	0.0791324	0.177567	Non-significant	-0.358424	-0.241559	NPX ~ NPC1 * Age_c + Sex + Error(SampleID)	35	0.14
NOTCH1	ENSG00000148400	Cardiometabolic	P46531	OID20311	Age_c	0.137736	0.0168986	0.177746	Non-significant	0.289052	-0.0145261	NPX ~ NPC1 * Age_c + Sex + Error(SampleID)		0.04
MKI67	ENSG00000148773	Inflammation_II	P46013	OID30455	NPC1	0.0791581	0.0793497	0.177776	Non-significant	-0.869988	-0.733863	NPX ~ NPC1 * Age_c + Sex + Error(SampleID)	39	1.51
NTproBNP		Cardiometabolic	NTproBNP	OID20125	NPC1	0.0773887	0.0793118	0.177776	Non-significant	-0.393118	-0.539993	NPX ~ NPC1 * Age_c + Sex + Error(SampleID)	39	0.82
SSC5D	ENSG00000179954	Cardiometabolic	A1L4H1	OID20351	NPC1	0.079811	0.0794503	0.177862	Non-significant	0.368684	0.250293	NPX ~ NPC1 * Age_c + Sex + Error(SampleID)	39	0.18
NFIC	ENSG00000141905	Neurology_II	P08651	OID30988	NPC1	0.079466	0.0800061	0.178966	Non-significant	-0.461893	-0.393467	NPX ~ NPC1 * Age_c + Sex + Error(SampleID)	39	0.44
ASGR1	ENSG00000141505	Neurology	P07306	OID20990	Age_c	0.140681	0.0170908	0.179109	Non-significant	-0.085325	0.020003	NPX ~ NPC1 * Age_c + Sex + Error(SampleID)		0.07
ADM	ENSG00000148926	Oncology	P35318	OID21467	NPC1	0.0762818	0.0803778	0.179657	Non-significant	-1.05759	-1.21249	NPX ~ NPC1 * Age_c + Sex + Error(SampleID)	38	4.19
SCIN	ENSG00000006747	Neurology_II	Q9Y6U3	OID30857	NPC1	0.0751761	0.0804597	0.1797	Non-significant	0.566992	0.813269	NPX ~ NPC1 * Age_c + Sex + Error(SampleID)	38	1.83
DNAJC21	ENSG00000168724	Neurology_II	Q5F1R6	OID31104	NPC1:Age_c	0.18329	0.00523188	0.180342	Non-significant	-0.298595	0.0330523	NPX ~ NPC1 * Age_c + Sex + Error(SampleID)		0.14
PALM2		Neurology_II	Q8IXS6	OID31096	NPC1	0.0761444	0.0808199	0.180363	Non-significant	0.321863	0.398704	NPX ~ NPC1 * Age_c + Sex + Error(SampleID)	39	0.45
PENK	ENSG00000181195	Inflammation_II	P01210	OID30666	Sex	0.2073	0.00277931	0.180719	Non-significant	0.334148	-0.285466	NPX ~ NPC1 * Age_c + Sex + Error(SampleID)		0.33
ROR1	ENSG00000185483	Cardiometabolic	Q01973	OID20224	NPC1	0.0763149	0.081048	0.180731	Non-significant	0.177537	0.201041	NPX ~ NPC1 * Age_c + Sex + Error(SampleID)	39	0.11
SCN2A	ENSG00000136531	Neurology_II	Q99250	OID30833	NPC1	0.0799772	0.0813213	0.181199	Non-significant	1.02666	0.890548	NPX ~ NPC1 * Age_c + Sex + Error(SampleID)	38	2.21
LEG1		Inflammation_II	Q6P5S2	OID30608	NPC1	0.0775552	0.0814183	0.181274	Non-significant	-0.543104	-0.481578	NPX ~ NPC1 * Age_c + Sex + Error(SampleID)	39	0.66
TXK	ENSG00000074966	Oncology_II	P42681	OID31262	NPC1	0.0791308	0.0814965	0.181307	Non-significant	0.696766	0.723558	NPX ~ NPC1 * Age_c + Sex + Error(SampleID)	37	1.44
CPA4	ENSG00000128510	Inflammation_II	Q9UI42	OID30606	Age_c	0.13665	0.017372	0.181391	Non-significant	-0.460902	0.0340545	NPX ~ NPC1 * Age_c + Sex + Error(SampleID)		0.22
USP28	ENSG00000048028	Neurology_II	Q96RU2	OID31084	NPC1	0.0761334	0.0816151	0.18143	Non-significant	0.450801	0.436763	NPX ~ NPC1 * Age_c + Sex + Error(SampleID)	39	0.54
ACRV1	ENSG00000134940	Inflammation_II	P26436	OID30513	Age_c	0.136454	0.0174589	0.181636	Non-significant	0.358518	0.0548123	NPX ~ NPC1 * Age_c + Sex + Error(SampleID)		0.56
UNC5D	ENSG00000156687	Inflammation_II	Q6UXZ4	OID30447	NPC1:Age_c	0.182047	0.00540432	0.181903	Non-significant	0.31175	0.0562435	NPX ~ NPC1 * Age_c + Sex + Error(SampleID)		0.42
AOC3	ENSG00000131471	Cardiometabolic	Q16853	OID20389	NPC1:Age_c	0.182175	0.00538631	0.181903	Non-significant	0.0225267	0.0321253	NPX ~ NPC1 * Age_c + Sex + Error(SampleID)		0.14
FGF12	ENSG00000114279	Inflammation_II	P61328	OID30454	Age_c	0.135956	0.0176816	0.181968	Non-significant	0.332173	-0.0576021	NPX ~ NPC1 * Age_c + Sex + Error(SampleID)		0.62
ICAM5	ENSG00000105376	Cardiometabolic	Q9UMF0	OID20145	Age_c	0.135987	0.0176677	0.181968	Non-significant	-0.00589083	-0.0346985	NPX ~ NPC1 * Age_c + Sex + Error(SampleID)		0.23
ADA2	ENSG00000093072	Cardiometabolic	Q9NZK5	OID20394	Age_c	0.136008	0.0176582	0.181968	Non-significant	1.84066	-0.0283538	NPX ~ NPC1 * Age_c + Sex + Error(SampleID)		0.15
F2	ENSG00000180210	Inflammation_II	P00734	OID30723	NPC1	0.0763273	0.0819418	0.182015	Non-significant	-0.330441	-0.318968	NPX ~ NPC1 * Age_c + Sex + Error(SampleID)	39	0.29
DDT	ENSG00000099977	Cardiometabolic_II	P30046	OID30372	NPC1	0.0757542	0.0820257	0.18206	Non-significant	0.597397	0.587796	NPX ~ NPC1 * Age_c + Sex + Error(SampleID)	39	0.99
ITGA5	ENSG00000161638	Neurology	P08648	OID21139	NPC1	0.0777446	0.0823456	0.18251	Non-significant	-0.287276	-0.223361	NPX ~ NPC1 * Age_c + Sex + Error(SampleID)	39	0.14
ADAM22	ENSG00000008277	Neurology	Q9P0K1	OID21001	NPC1	0.0724796	0.0823558	0.18251	Non-significant	0.259725	0.204522	NPX ~ NPC1 * Age_c + Sex + Error(SampleID)	38	0.12
SSNA1	ENSG00000176101	Oncology_II	O43805	OID31453	NPC1	0.0750212	0.0828697	0.183359	Non-significant	0.696047	0.74048	NPX ~ NPC1 * Age_c + Sex + Error(SampleID)	39	1.58
BTN1A1	ENSG00000124557	Oncology_II	Q13410	OID31363	NPC1	0.0760023	0.0828777	0.183359	Non-significant	0.573882	0.468635	NPX ~ NPC1 * Age_c + Sex + Error(SampleID)	39	0.63
SCRG1	ENSG00000164106	Cardiometabolic_II	O75711	OID30333	NPC1	0.0642317	0.0829315	0.183359	Non-significant	-0.0231274	0.415526	NPX ~ NPC1 * Age_c + Sex + Error(SampleID)	38	0.47
ARTN	ENSG00000117407	Inflammation	Q5T4W7	OID20446	NPC1	0.0810565	0.0831961	0.183802	Non-significant	0.506733	0.61385	NPX ~ NPC1 * Age_c + Sex + Error(SampleID)	36	0.88
GAD1	ENSG00000128683	Oncology_II	Q99259	OID31166	NPC1	0.0730574	0.0833419	0.183982	Non-significant	0.289186	0.385593	NPX ~ NPC1 * Age_c + Sex + Error(SampleID)	39	0.43
SORT1	ENSG00000134243	Cardiometabolic	Q99523	OID20213	NPC1	0.0736265	0.0835078	0.184207	Non-significant	0.143526	0.257588	NPX ~ NPC1 * Age_c + Sex + Error(SampleID)	39	0.19
IRAG2	ENSG00000118308	Cardiometabolic	Q12912	OID20085	Age_c	0.162441	0.0181064	0.18435	Non-significant	-1.87226	-0.104533	NPX ~ NPC1 * Age_c + Sex + Error(SampleID)		1.38
PRELP	ENSG00000188783	Inflammation	P51888	OID20766	Age_c	0.135027	0.018104	0.18435	Non-significant	-0.0779033	0.0268958	NPX ~ NPC1 * Age_c + Sex + Error(SampleID)		0.14
RET	ENSG00000165731	Oncology	P07949	OID21346	Age_c	0.142043	0.0180286	0.18435	Non-significant	-0.301135	-0.0238327	NPX ~ NPC1 * Age_c + Sex + Error(SampleID)		0.11
NXPH3	ENSG00000182575	Inflammation_II	O95157	OID30565	NPC1:Age_c	0.181052	0.00554629	0.184511	Non-significant	0.110559	0.067191	NPX ~ NPC1 * Age_c + Sex + Error(SampleID)		0.60
GGH	ENSG00000137563	Cardiometabolic	Q92820	OID20416	NPC1	0.0750909	0.083791	0.184689	Non-significant	-0.234128	-0.235599	NPX ~ NPC1 * Age_c + Sex + Error(SampleID)	39	0.16
CPE	ENSG00000109472	Oncology	P16870	OID21392	NPC1	0.0781843	0.0839803	0.184964	Non-significant	0.147549	0.196778	NPX ~ NPC1 * Age_c + Sex + Error(SampleID)	38	0.11
SYTL4	ENSG00000102362	Cardiometabolic_II	Q96C24	OID30339	Age_c	0.13779	0.0183645	0.185003	Non-significant	-2.64391	-0.100885	NPX ~ NPC1 * Age_c + Sex + Error(SampleID)		1.93
STK4	ENSG00000101109	Cardiometabolic	Q13043	OID20140	Age_c	0.134534	0.0183326	0.185003	Non-significant	-1.10951	-0.0632032	NPX ~ NPC1 * Age_c + Sex + Error(SampleID)		0.76
CALCA	ENSG00000110680	Neurology	P01258	OID20983	Age_c	0.137941	0.0182957	0.185003	Non-significant	1.07386	-0.0477034	NPX ~ NPC1 * Age_c + Sex + Error(SampleID)		0.43
IL1B	ENSG00000125538	Inflammation	P01584	OID20427	Age_c	0.144579	0.0185304	0.185127	Non-significant	-3.12059	-0.155075	NPX ~ NPC1 * Age_c + Sex + Error(SampleID)		3.78
ALCAM	ENSG00000170017	Cardiometabolic	Q13740	OID20273	Age_c	0.134026	0.0185709	0.185127	Non-significant	0.0694417	-0.0224034	NPX ~ NPC1 * Age_c + Sex + Error(SampleID)		0.10
JAM2	ENSG00000154721	Neurology	P57087	OID21064	Age_c	0.134093	0.0185391	0.185127	Non-significant	-0.117218	-0.0202298	NPX ~ NPC1 * Age_c + Sex + Error(SampleID)		0.08
CLMP	ENSG00000166250	Oncology	Q9H6B4	OID21419	Age_c	0.137155	0.0186568	0.185338	Non-significant	-0.0175726	0.0177684	NPX ~ NPC1 * Age_c + Sex + Error(SampleID)		0.06
FCGR3B	ENSG00000162747	Cardiometabolic	O75015	OID20387	NPC1	0.0755111	0.084405	0.185756	Non-significant	0.466687	0.387227	NPX ~ NPC1 * Age_c + Sex + Error(SampleID)	39	0.44
CXCL6	ENSG00000124875	Inflammation	P80162	OID20613	NPC1	0.0781817	0.0848551	0.186603	Non-significant	0.334892	0.49245	NPX ~ NPC1 * Age_c + Sex + Error(SampleID)	37	0.70
SORBS1	ENSG00000095637	Neurology_II	Q9BX66	OID30978	NPC1	0.0758129	0.0849572	0.186653	Non-significant	0.590155	0.411633	NPX ~ NPC1 * Age_c + Sex + Error(SampleID)	39	0.49
VASN	ENSG00000168140	Cardiometabolic	Q6EMK4	OID20345	NPC1	0.0736739	0.0850084	0.186653	Non-significant	-0.232802	-0.23405	NPX ~ NPC1 * Age_c + Sex + Error(SampleID)	39	0.16
CXCL8	ENSG00000169429	Oncology	P10145	OID21430	Age_c	0.136621	0.0189059	0.186922	Non-significant	-3.70215	-0.119763	NPX ~ NPC1 * Age_c + Sex + Error(SampleID)		2.74
CLEC5A	ENSG00000258227	Cardiometabolic	Q9NY25	OID20165	Age_c	0.132966	0.0190777	0.186922	Non-significant	-0.394108	-0.0414593	NPX ~ NPC1 * Age_c + Sex + Error(SampleID)		0.33
PTH1R	ENSG00000160801	Inflammation	Q03431	OID20571	Age_c	0.139932	0.018977	0.186922	Non-significant	0.228853	-0.0212361	NPX ~ NPC1 * Age_c + Sex + Error(SampleID)		0.09
NME3	ENSG00000103024	Inflammation	Q13232	OID20789	Age_c	0.133025	0.0190492	0.186922	Non-significant	-0.248513	-0.0150449	NPX ~ NPC1 * Age_c + Sex + Error(SampleID)		0.04
DNLZ	ENSG00000213221	Neurology_II	Q5SXM8	OID30822	NPC1	0.0763932	0.0854413	0.187392	Non-significant	-0.907366	-1.06301	NPX ~ NPC1 * Age_c + Sex + Error(SampleID)	38	3.23
NAPRT	ENSG00000147813	Neurology_II	Q6XQN6	OID31114	NPC1	0.0742834	0.0855656	0.187392	Non-significant	0.729876	0.745037	NPX ~ NPC1 * Age_c + Sex + Error(SampleID)	39	1.62
PLIN3	ENSG00000105355	Cardiometabolic	O60664	OID20143	NPC1	0.0764197	0.0855606	0.187392	Non-significant	-0.516942	-0.406672	NPX ~ NPC1 * Age_c + Sex + Error(SampleID)	39	0.48
RET	ENSG00000165731	Oncology	P07949	OID21346	NPC1	0.078222	0.0856071	0.187392	Non-significant	-0.301135	-0.195488	NPX ~ NPC1 * Age_c + Sex + Error(SampleID)	37	0.11
ENPP6	ENSG00000164303	Cardiometabolic_II	Q6UWR7	OID30273	NPC1	0.0775151	0.085886	0.187859	Non-significant	-0.504036	-0.263457	NPX ~ NPC1 * Age_c + Sex + Error(SampleID)	38	0.19
CR2	ENSG00000117322	Cardiometabolic	P20023	OID20393	Sex	0.204956	0.002958	0.188063	Non-significant	0.718791	0.195634	NPX ~ NPC1 * Age_c + Sex + Error(SampleID)		0.16
IGSF8	ENSG00000162729	Cardiometabolic	Q969P0	OID20167	NPC1:Age_c	0.179875	0.00571908	0.188072	Non-significant	0.0769608	0.028596	NPX ~ NPC1 * Age_c + Sex + Error(SampleID)		0.11
ICA1	ENSG00000003147	Inflammation	Q05084	OID20484	NPC1	0.0795241	0.0863623	0.188469	Non-significant	-1.15952	-0.930608	NPX ~ NPC1 * Age_c + Sex + Error(SampleID)	36	2.06
CHGA	ENSG00000100604	Cardiometabolic_II	P10645	OID30403	NPC1	0.0728378	0.0862985	0.188469	Non-significant	0.316978	0.395373	NPX ~ NPC1 * Age_c + Sex + Error(SampleID)	39	0.46
OSBPL2	ENSG00000130703	Neurology_II	Q9H1P3	OID31085	NPC1	0.0752226	0.0863368	0.188469	Non-significant	-0.374792	-0.309426	NPX ~ NPC1 * Age_c + Sex + Error(SampleID)	39	0.28
NOP56	ENSG00000101361	Cardiometabolic_II	O00567	OID30055	NPC1	0.0740301	0.0865234	0.188676	Non-significant	1.01574	1.05321	NPX ~ NPC1 * Age_c + Sex + Error(SampleID)	39	3.27
NXPH1	ENSG00000122584	Neurology	P58417	OID20849	Age_c	0.146601	0.0193365	0.188811	Non-significant	0.314063	-0.0234451	NPX ~ NPC1 * Age_c + Sex + Error(SampleID)		0.09
RLN2	ENSG00000107014	Inflammation_II	P04090	OID30601	NPC1	0.0723548	0.0866767	0.188867	Non-significant	-0.310975	-0.571495	NPX ~ NPC1 * Age_c + Sex + Error(SampleID)	39	0.96
CRNN	ENSG00000143536	Oncology	Q9UBG3	OID21427	Sex	0.208695	0.00304429	0.189341	Non-significant	0.02647	-0.441856	NPX ~ NPC1 * Age_c + Sex + Error(SampleID)		0.79
CSF1R	ENSG00000182578	Inflammation_II	P07333	OID30681	Age_c	0.132163	0.0194711	0.189479	Non-significant	1.00808	-0.0364508	NPX ~ NPC1 * Age_c + Sex + Error(SampleID)		0.26
CD207	ENSG00000116031	Oncology	Q9UJ71	OID21298	NPC1	0.0771537	0.0872931	0.190065	Non-significant	-0.21194	-0.29179	NPX ~ NPC1 * Age_c + Sex + Error(SampleID)	37	0.24
CNTNAP4	ENSG00000152910	Neurology_II	Q9C0A0	OID30911	NPC1	0.0847011	0.0875511	0.190477	Non-significant	0.568158	0.769023	NPX ~ NPC1 * Age_c + Sex + Error(SampleID)	35	1.55
PLA2G1B	ENSG00000170890	Cardiometabolic	P04054	OID20252	NPC1	0.0727499	0.0876156	0.190477	Non-significant	0.271406	0.237087	NPX ~ NPC1 * Age_c + Sex + Error(SampleID)	39	0.17
MYL1	ENSG00000168530	Cardiometabolic_II	P05976	OID30120	Age_c	0.131405	0.0198492	0.190565	Non-significant	0.117494	0.0650539	NPX ~ NPC1 * Age_c + Sex + Error(SampleID)		0.83
BTN3A2	ENSG00000186470	Inflammation	P78410	OID20540	Age_c	0.138164	0.0198094	0.190565	Non-significant	-0.490646	-0.0402794	NPX ~ NPC1 * Age_c + Sex + Error(SampleID)		0.31
TNN	ENSG00000120332	Cardiometabolic_II	Q9UQP3	OID30412	Age_c	0.131412	0.0198455	0.190565	Non-significant	-0.072525	-0.0342968	NPX ~ NPC1 * Age_c + Sex + Error(SampleID)		0.23
GSN	ENSG00000148180	Inflammation_II	P06396	OID30714	Age_c	0.131696	0.0197032	0.190565	Non-significant	-0.356617	0.0154263	NPX ~ NPC1 * Age_c + Sex + Error(SampleID)		0.05
INHBB	ENSG00000163083	Inflammation_II	P09529	OID30625	NPC1	0.0746843	0.087991	0.190858	Non-significant	0.51144	0.343611	NPX ~ NPC1 * Age_c + Sex + Error(SampleID)	39	0.35
PEPD	ENSG00000124299	Inflammation_II	P12955	OID30688	NPC1	0.0722148	0.0879757	0.190858	Non-significant	0.125639	0.204173	NPX ~ NPC1 * Age_c + Sex + Error(SampleID)	39	0.12
ESM1	ENSG00000164283	Inflammation	Q9NQ30	OID20758	NPC1	0.0728922	0.0879737	0.190858	Non-significant	0.183532	0.197225	NPX ~ NPC1 * Age_c + Sex + Error(SampleID)	39	0.12
TMED10	ENSG00000170348	Cardiometabolic_II	P49755	OID30068	NPC1	0.0732234	0.0881417	0.19104	Non-significant	0.883124	0.928836	NPX ~ NPC1 * Age_c + Sex + Error(SampleID)	39	2.57
PLXDC2	ENSG00000120594	Neurology_II	Q6UX71	OID31101	NPC1	0.071692	0.0883231	0.191289	Non-significant	0.260242	0.350469	NPX ~ NPC1 * Age_c + Sex + Error(SampleID)	39	0.37
STOML2	ENSG00000165283	Oncology_II	Q9UJZ1	OID31183	NPC1	0.0723466	0.0885985	0.19174	Non-significant	1.2856	1.51079	NPX ~ NPC1 * Age_c + Sex + Error(SampleID)	39	6.81
NOS1	ENSG00000089250	Neurology	P29475	OID20863	NPC1	0.0828537	0.0888273	0.19209	Non-significant	0.463467	0.32955	NPX ~ NPC1 * Age_c + Sex + Error(SampleID)	35	0.28
EFCAB2	ENSG00000203666	Oncology_II	Q5VUJ9	OID31313	NPC1	0.0680479	0.0889424	0.192167	Non-significant	-0.409744	-0.395805	NPX ~ NPC1 * Age_c + Sex + Error(SampleID)	37	0.45
ASAH2	ENSG00000188611	Neurology	Q9NR71	OID20996	NPC1	0.0804063	0.0889973	0.192167	Non-significant	-0.133574	-0.305207	NPX ~ NPC1 * Age_c + Sex + Error(SampleID)	38	0.28
CNGB3	ENSG00000170289	Neurology_II	Q9NQW8	OID30805	NPC1	0.0728975	0.0895372	0.193187	Non-significant	-0.470811	-0.601113	NPX ~ NPC1 * Age_c + Sex + Error(SampleID)	38	1.06
SUSD2	ENSG00000099994	Neurology	Q9UGT4	OID21098	NPC1	0.0714365	0.0896144	0.193208	Non-significant	-0.07399	-0.19387	NPX ~ NPC1 * Age_c + Sex + Error(SampleID)	39	0.11
PFDN4	ENSG00000101132	Oncology_II	Q9NQP4	OID31212	NPC1	0.0712403	0.0897646	0.193386	Non-significant	1.03026	1.00168	NPX ~ NPC1 * Age_c + Sex + Error(SampleID)	39	3.02
VIM	ENSG00000026025	Cardiometabolic	P08670	OID20053	NPC1:Age_c	0.212405	0.0060862	0.193474	Non-significant	-0.680198	0.0894291	NPX ~ NPC1 * Age_c + Sex + Error(SampleID)		0.73
EDDM3B	ENSG00000181552	Oncology_II	P56851	OID31365	NPC1:Age_c	0.177624	0.00606399	0.193474	Non-significant	0.522518	-0.074782	NPX ~ NPC1 * Age_c + Sex + Error(SampleID)		0.77
DDC	ENSG00000132437	Cardiometabolic	P20711	OID20215	NPC1:Age_c	0.177942	0.00601397	0.193474	Non-significant	-0.166455	0.0457865	NPX ~ NPC1 * Age_c + Sex + Error(SampleID)		0.29
MCFD2	ENSG00000180398	Cardiometabolic	Q8NI22	OID20171	Age_c	0.130591	0.0202638	0.193895	Non-significant	-0.417073	-0.0190886	NPX ~ NPC1 * Age_c + Sex + Error(SampleID)		0.07
SNAP25	ENSG00000132639	Neurology_II	P60880	OID30811	NPC1	0.0645464	0.0901075	0.193979	Non-significant	-0.00686689	0.361745	NPX ~ NPC1 * Age_c + Sex + Error(SampleID)	38	0.39
BRD3	ENSG00000169925	Cardiometabolic_II	Q15059	OID30093	Age_c	0.130232	0.0204494	0.194371	Non-significant	-0.937271	-0.0780967	NPX ~ NPC1 * Age_c + Sex + Error(SampleID)		1.20
CALB2	ENSG00000172137	Neurology	P22676	OID20801	Age_c	0.144238	0.0204225	0.194371	Non-significant	0.4712	0.060032	NPX ~ NPC1 * Age_c + Sex + Error(SampleID)		0.62
SPAG1	ENSG00000104450	Neurology_II	Q07617	OID30979	NPC1	0.0759818	0.0904801	0.194634	Non-significant	-0.525962	-0.339887	NPX ~ NPC1 * Age_c + Sex + Error(SampleID)	39	0.35
IGFL4	ENSG00000204869	Inflammation_II	Q6B9Z1	OID30500	NPC1	0.0741074	0.0905817	0.194642	Non-significant	0.624737	0.551449	NPX ~ NPC1 * Age_c + Sex + Error(SampleID)	39	0.92
KLRF1	ENSG00000150045	Inflammation_II	Q9NZS2	OID30464	NPC1	0.0716497	0.0906199	0.194642	Non-significant	0.375267	0.482493	NPX ~ NPC1 * Age_c + Sex + Error(SampleID)	39	0.70
GLT8D2	ENSG00000120820	Neurology	Q9H1C3	OID20825	NPC1	0.0798012	0.0914589	0.196166	Non-significant	-0.385999	-0.544351	NPX ~ NPC1 * Age_c + Sex + Error(SampleID)	35	0.77
WARS		Neurology	P23381	OID21084	NPC1	0.0702857	0.0914662	0.196166	Non-significant	0.300748	0.43887	NPX ~ NPC1 * Age_c + Sex + Error(SampleID)	39	0.59
MRI1	ENSG00000037757	Neurology_II	Q9BV20	OID30891	NPC1	0.0811175	0.0917852	0.196702	Non-significant	0.764436	0.798001	NPX ~ NPC1 * Age_c + Sex + Error(SampleID)	35	1.72
APEX1	ENSG00000100823	Oncology	P27695	OID21434	NPC1	0.0681256	0.0920255	0.19707	Non-significant	-0.835627	-0.744506	NPX ~ NPC1 * Age_c + Sex + Error(SampleID)	38	1.71
FLT3LG	ENSG00000090554	Inflammation	P49771	OID20661	Sex	0.211315	0.00323876	0.197151	Non-significant	-0.167532	-0.167269	NPX ~ NPC1 * Age_c + Sex + Error(SampleID)		0.11
LRRC59	ENSG00000108829	Cardiometabolic_II	Q96AG4	OID30361	Age_c	0.132677	0.0208508	0.197241	Non-significant	-1.57766	-0.0829897	NPX ~ NPC1 * Age_c + Sex + Error(SampleID)		1.36
COL3A1	ENSG00000168542	Cardiometabolic_II	P02461	OID30379	Age_c	0.129394	0.0208892	0.197241	Non-significant	-0.702605	-0.0400484	NPX ~ NPC1 * Age_c + Sex + Error(SampleID)		0.32
ACTN4	ENSG00000130402	Inflammation	O43707	OID20435	NPC1	0.0766958	0.0923705	0.197513	Non-significant	-0.435601	-0.463603	NPX ~ NPC1 * Age_c + Sex + Error(SampleID)	36	0.53
VEGFA	ENSG00000112715	Inflammation	P15692	OID20650	NPC1	0.0742588	0.0923318	0.197513	Non-significant	-0.478251	-0.42255	NPX ~ NPC1 * Age_c + Sex + Error(SampleID)	37	0.54
ECE1	ENSG00000117298	Neurology	P42892	OID20891	NPC1	0.0791061	0.0927684	0.198215	Non-significant	0.167919	0.169044	NPX ~ NPC1 * Age_c + Sex + Error(SampleID)	35	0.08
MBL2	ENSG00000165471	Inflammation_II	P11226	OID30759	NPC1	0.0720092	0.0928384	0.198217	Non-significant	-1.09405	-0.862274	NPX ~ NPC1 * Age_c + Sex + Error(SampleID)	39	2.28
FABP4	ENSG00000170323	Cardiometabolic	P15090	OID20245	Sex	0.200484	0.00333019	0.198493	Non-significant	-0.311536	-0.316754	NPX ~ NPC1 * Age_c + Sex + Error(SampleID)		0.43
KIR2DL2	ENSG00000276011	Oncology_II	P43627	OID31431	Age_c	0.12891	0.0211469	0.198665	Non-significant	1.135	-0.066463	NPX ~ NPC1 * Age_c + Sex + Error(SampleID)		0.88
PLA2G7	ENSG00000146070	Neurology	Q13093	OID21105	Age_c	0.128851	0.0211789	0.198665	Non-significant	1.9879	0.0189564	NPX ~ NPC1 * Age_c + Sex + Error(SampleID)		0.07
FUT3_FUT5		Neurology	P21217_Q11128	OID21013	NPC1	0.0726675	0.0934112	0.199291	Non-significant	0.387024	0.314217	NPX ~ NPC1 * Age_c + Sex + Error(SampleID)	39	0.30
ZPR1	ENSG00000109917	Neurology_II	O75312	OID30801	Age_c	0.131001	0.0217359	0.199315	Non-significant	-0.351913	-0.103339	NPX ~ NPC1 * Age_c + Sex + Error(SampleID)		2.07
INSL4	ENSG00000120211	Oncology_II	Q14641	OID31370	Age_c	0.128385	0.0214309	0.199315	Non-significant	0.584852	0.0949713	NPX ~ NPC1 * Age_c + Sex + Error(SampleID)		1.81
ENTPD2	ENSG00000054179	Oncology	Q9Y5L3	OID21260	Age_c	0.138067	0.0216219	0.199315	Non-significant	0.0644234	-0.0493644	NPX ~ NPC1 * Age_c + Sex + Error(SampleID)		0.41
TNC	ENSG00000041982	Cardiometabolic	P24821	OID20359	Age_c	0.127918	0.0216864	0.199315	Non-significant	-0.179378	-0.0336915	NPX ~ NPC1 * Age_c + Sex + Error(SampleID)		0.23
CCL27	ENSG00000213927	Cardiometabolic	Q9Y4X3	OID20121	Age_c	0.128428	0.0214074	0.199315	Non-significant	0.648391	0.0296825	NPX ~ NPC1 * Age_c + Sex + Error(SampleID)		0.18
AGT	ENSG00000135744	Inflammation_II	P01019	OID30709	Age_c	0.128048	0.0216148	0.199315	Non-significant	-0.128879	0.027814	NPX ~ NPC1 * Age_c + Sex + Error(SampleID)		0.16
CD1C	ENSG00000158481	Oncology	P29017	OID21483	Age_c	0.128028	0.0216256	0.199315	Non-significant	-0.159603	-0.0207798	NPX ~ NPC1 * Age_c + Sex + Error(SampleID)		0.09
ANXA2	ENSG00000182718	Cardiometabolic_II	P07355	OID30263	NPC1	0.0731236	0.0939742	0.200284	Non-significant	-0.621508	-0.482133	NPX ~ NPC1 * Age_c + Sex + Error(SampleID)	38	0.68
ENO2	ENSG00000111674	Neurology	P09104	OID21046	NPC1	0.0701012	0.0940168	0.200284	Non-significant	0.399026	0.43487	NPX ~ NPC1 * Age_c + Sex + Error(SampleID)	39	0.58
CRH	ENSG00000147571	Oncology	P06850	OID21257	NPC1:Age_c	0.189064	0.00637125	0.200309	Non-significant	-2.22348	0.101552	NPX ~ NPC1 * Age_c + Sex + Error(SampleID)		1.18
DCUN1D1	ENSG00000043093	Neurology_II	Q96GG9	OID30830	NPC1	0.0717056	0.0941201	0.200355	Non-significant	0.923907	0.975507	NPX ~ NPC1 * Age_c + Sex + Error(SampleID)	38	2.88
ACP1	ENSG00000143727	Inflammation_II	P24666	OID30524	NPC1	0.0716219	0.0942561	0.200496	Non-significant	-1.00213	-0.964616	NPX ~ NPC1 * Age_c + Sex + Error(SampleID)	39	2.88
DSCAM	ENSG00000171587	Neurology_II	O60469	OID30993	Age_c	0.127464	0.0219376	0.200522	Non-significant	1.6316	-0.0378716	NPX ~ NPC1 * Age_c + Sex + Error(SampleID)		0.29
VIM	ENSG00000026025	Cardiometabolic	P08670	OID20053	NPC1	0.0588407	0.0950271	0.201985	Non-significant	-0.680198	-0.515402	NPX ~ NPC1 * Age_c + Sex + Error(SampleID)	32	0.73
ITGB1BP2	ENSG00000147166	Cardiometabolic	Q9UKP3	OID20112	Age_c	0.152516	0.0223991	0.202157	Non-significant	-1.48902	-0.123506	NPX ~ NPC1 * Age_c + Sex + Error(SampleID)		2.08
TIMP3	ENSG00000100234	Inflammation	P35625	OID20684	Age_c	0.126813	0.0223028	0.202157	Non-significant	-0.743041	-0.0902434	NPX ~ NPC1 * Age_c + Sex + Error(SampleID)		1.65
VIM	ENSG00000026025	Cardiometabolic	P08670	OID20053	Age_c	0.152932	0.0222004	0.202157	Non-significant	-0.680198	-0.0732161	NPX ~ NPC1 * Age_c + Sex + Error(SampleID)		0.73
RRM2B	ENSG00000048392	Oncology	Q7LG56	OID21174	Age_c	0.136582	0.0223953	0.202157	Non-significant	0.351736	-0.053456	NPX ~ NPC1 * Age_c + Sex + Error(SampleID)		0.48
ISLR2	ENSG00000167178	Neurology	Q6UXK2	OID20889	NPC1	0.0760106	0.0954011	0.20263	Non-significant	0.0734869	0.33233	NPX ~ NPC1 * Age_c + Sex + Error(SampleID)	35	0.29
TNFSF9	ENSG00000125657	Inflammation_II	P41273	OID30435	NPC1	0.0701198	0.0954897	0.202668	Non-significant	0.371642	0.472053	NPX ~ NPC1 * Age_c + Sex + Error(SampleID)	39	0.69
TP53BP1	ENSG00000067369	Inflammation_II	Q12888	OID30470	NPC1	0.072029	0.095734	0.202693	Non-significant	-0.885872	-0.615571	NPX ~ NPC1 * Age_c + Sex + Error(SampleID)	39	1.18
SEZ6L	ENSG00000100095	Oncology	Q9BYH1	OID21488	NPC1	0.0673648	0.0957851	0.202693	Non-significant	0.100723	0.378219	NPX ~ NPC1 * Age_c + Sex + Error(SampleID)	39	0.45
SEMA3F	ENSG00000001617	Cardiometabolic	Q13275	OID20186	NPC1	0.0716755	0.095755	0.202693	Non-significant	0.285507	0.197583	NPX ~ NPC1 * Age_c + Sex + Error(SampleID)	39	0.12
GC	ENSG00000145321	Inflammation_II	P02774	OID30780	NPC1	0.0702206	0.0956901	0.202693	Non-significant	-0.189337	-0.174043	NPX ~ NPC1 * Age_c + Sex + Error(SampleID)	39	0.09
DDAH1	ENSG00000153904	Oncology	O94760	OID21299	NPC1	0.072897	0.0958708	0.202725	Non-significant	0.297	0.405337	NPX ~ NPC1 * Age_c + Sex + Error(SampleID)	37	0.49
EIF2AK2	ENSG00000055332	Oncology_II	P19525	OID31442	NPC1	0.0722772	0.0959947	0.202837	Non-significant	-1.59268	-1.18778	NPX ~ NPC1 * Age_c + Sex + Error(SampleID)	39	4.41
NMT1	ENSG00000136448	Neurology_II	P30419	OID31021	NPC1	0.072214	0.0963705	0.20348	Non-significant	-1.13731	-0.808788	NPX ~ NPC1 * Age_c + Sex + Error(SampleID)	39	2.05
IL17A	ENSG00000112115	Inflammation	Q16552	OID20469	NPC1	0.0747921	0.0966771	0.203977	Non-significant	0.398468	0.532437	NPX ~ NPC1 * Age_c + Sex + Error(SampleID)	36	0.72
FLT3LG	ENSG00000090554	Inflammation	P49771	OID20661	NPC1:Age_c	0.183199	0.00656417	0.204131	Non-significant	-0.167532	0.0311432	NPX ~ NPC1 * Age_c + Sex + Error(SampleID)		0.11
CMC1	ENSG00000187118	Cardiometabolic_II	Q7Z7K0	OID30360	NPC1	0.0782279	0.0968695	0.204233	Non-significant	-0.82654	-0.72041	NPX ~ NPC1 * Age_c + Sex + Error(SampleID)	38	1.55
CFD	ENSG00000197766	Inflammation_II	P00746	OID30738	NPC1	0.0683214	0.0971509	0.204529	Non-significant	-0.255041	-0.383866	NPX ~ NPC1 * Age_c + Sex + Error(SampleID)	39	0.46
ADAMTS15	ENSG00000166106	Oncology	Q8TE58	OID21275	NPC1	0.0730825	0.0972245	0.204529	Non-significant	0.512608	0.380668	NPX ~ NPC1 * Age_c + Sex + Error(SampleID)	37	0.44
TACSTD2	ENSG00000184292	Oncology	P09758	OID21447	NPC1	0.0670749	0.0971644	0.204529	Non-significant	-0.184275	-0.16512	NPX ~ NPC1 * Age_c + Sex + Error(SampleID)	38	0.09
LTBP2	ENSG00000119681	Cardiometabolic	Q14767	OID20254	NPC1	0.0689484	0.0974372	0.204826	Non-significant	0.332547	0.256061	NPX ~ NPC1 * Age_c + Sex + Error(SampleID)	39	0.21
TNIP1	ENSG00000145901	Neurology_II	Q15025	OID31120	NPC1	0.0709004	0.0983324	0.206556	Non-significant	-0.961567	-0.766698	NPX ~ NPC1 * Age_c + Sex + Error(SampleID)	39	1.87
FGF2	ENSG00000138685	Inflammation	P09038	OID20503	Age_c	0.132022	0.0229893	0.206831	Non-significant	-0.692182	-0.0532491	NPX ~ NPC1 * Age_c + Sex + Error(SampleID)		0.58
TIMM8A	ENSG00000126953	Neurology_II	O60220	OID31143	NPC1	0.0709832	0.0986704	0.207114	Non-significant	-0.568073	-0.420785	NPX ~ NPC1 * Age_c + Sex + Error(SampleID)	39	0.56
ANGPT2	ENSG00000091879	Oncology	O15123	OID21463	NPC1	0.0697773	0.0989677	0.207585	Non-significant	0.274284	0.253357	NPX ~ NPC1 * Age_c + Sex + Error(SampleID)	38	0.21
IGFBPL1	ENSG00000137142	Cardiometabolic	Q8WX77	OID20155	NPC1	0.0686001	0.0991698	0.207857	Non-significant	0.298216	0.292907	NPX ~ NPC1 * Age_c + Sex + Error(SampleID)	39	0.27
C1QL2	ENSG00000144119	Inflammation_II	Q7Z5L3	OID30515	NPC1	0.065993	0.0995101	0.208265	Non-significant	0.042675	0.238561	NPX ~ NPC1 * Age_c + Sex + Error(SampleID)	39	0.18
GFRA3	ENSG00000146013	Neurology	O60609	OID20933	NPC1	0.0698546	0.0994404	0.208265	Non-significant	0.193323	0.231396	NPX ~ NPC1 * Age_c + Sex + Error(SampleID)	38	0.17
PAK4	ENSG00000130669	Neurology	O96013	OID20819	NPC1	0.0754969	0.0996189	0.20834	Non-significant	0.443146	0.676934	NPX ~ NPC1 * Age_c + Sex + Error(SampleID)	35	1.26
SNX2	ENSG00000205302	Oncology_II	O60749	OID31374	NPC1	0.0672323	0.0997556	0.208474	Non-significant	0.701597	0.767246	NPX ~ NPC1 * Age_c + Sex + Error(SampleID)	39	1.88
MMP1	ENSG00000196611	Inflammation	P03956	OID20672	NPC1	0.0715744	0.0998316	0.20848	Non-significant	-0.433449	-0.535773	NPX ~ NPC1 * Age_c + Sex + Error(SampleID)	37	0.91
CD59	ENSG00000085063	Cardiometabolic	P13987	OID20339	Age_c	0.125084	0.0233025	0.208992	Non-significant	-0.0631858	0.0170809	NPX ~ NPC1 * Age_c + Sex + Error(SampleID)		0.06
LRPAP1	ENSG00000163956	Neurology	P30533	OID21059	Age_c	0.124958	0.0233771	0.209006	Non-significant	-0.482567	-0.0506179	NPX ~ NPC1 * Age_c + Sex + Error(SampleID)		0.53
KCTD5	ENSG00000167977	Neurology_II	Q9NXV2	OID31148	Age_c	0.124785	0.0234796	0.209268	Non-significant	-0.03293	-0.0519848	NPX ~ NPC1 * Age_c + Sex + Error(SampleID)		0.56
IL13RA1	ENSG00000131724	Oncology	P78552	OID21504	Age_c	0.124628	0.0235732	0.20945	Non-significant	-0.188598	-0.0171661	NPX ~ NPC1 * Age_c + Sex + Error(SampleID)		0.06
LPA	ENSG00000198670	Inflammation_II	P08519	OID30747	NPC1	0.0673728	0.100494	0.209711	Non-significant	-1.08521	-1.20571	NPX ~ NPC1 * Age_c + Sex + Error(SampleID)	39	4.68
FAM172A		Cardiometabolic_II	Q8WUF8	OID30248	NPC1	0.0704051	0.100575	0.209727	Non-significant	-0.588961	-0.476537	NPX ~ NPC1 * Age_c + Sex + Error(SampleID)	38	0.70
PAEP	ENSG00000122133	Neurology	P09466	OID20925	NPC1:Age_c	0.176062	0.00703319	0.20988	Non-significant	-0.032055	-0.106618	NPX ~ NPC1 * Age_c + Sex + Error(SampleID)		1.61
CSPG5	ENSG00000114646	Neurology_II	O95196	OID30843	NPC1:Age_c	0.17601	0.00704246	0.20988	Non-significant	0.769164	0.0771742	NPX ~ NPC1 * Age_c + Sex + Error(SampleID)		0.81
SEC31A	ENSG00000138674	Cardiometabolic_II	O94979	OID30269	NPC1:Age_c	0.17602	0.0070407	0.20988	Non-significant	-0.470549	0.0618903	NPX ~ NPC1 * Age_c + Sex + Error(SampleID)		0.51
CLEC5A	ENSG00000258227	Cardiometabolic	Q9NY25	OID20165	NPC1:Age_c	0.171956	0.0070248	0.20988	Non-significant	-0.394108	0.0482127	NPX ~ NPC1 * Age_c + Sex + Error(SampleID)		0.33
FABP6	ENSG00000170231	Cardiometabolic	P51161	OID20076	NPC1	0.0755673	0.100935	0.210324	Non-significant	0.390052	0.371636	NPX ~ NPC1 * Age_c + Sex + Error(SampleID)	32	0.39
GUCY2C	ENSG00000070019	Oncology_II	P25092	OID31318	Age_c	0.130355	0.0239362	0.210922	Non-significant	1.86194	-0.140738	NPX ~ NPC1 * Age_c + Sex + Error(SampleID)		3.86
PAFAH2	ENSG00000158006	Oncology_II	Q99487	OID31286	Age_c	0.130286	0.0239763	0.210922	Non-significant	-0.0113556	-0.136973	NPX ~ NPC1 * Age_c + Sex + Error(SampleID)		3.66
SCARB1	ENSG00000073060	Neurology	Q8WTV0	OID20805	Age_c	0.137188	0.0240338	0.210922	Non-significant	-0.0482247	-0.104423	NPX ~ NPC1 * Age_c + Sex + Error(SampleID)		1.98
DNAJC21	ENSG00000168724	Neurology_II	Q5F1R6	OID31104	Age_c	0.123887	0.0240203	0.210922	Non-significant	-0.298595	-0.0262536	NPX ~ NPC1 * Age_c + Sex + Error(SampleID)		0.14
YY1	ENSG00000100811	Inflammation_II	P25490	OID30446	NPC1	0.0694881	0.101484	0.211313	Non-significant	-0.961635	-0.770765	NPX ~ NPC1 * Age_c + Sex + Error(SampleID)	39	1.92
SSBP1	ENSG00000106028	Inflammation_II	Q04837	OID30468	Age_c	0.123656	0.0241612	0.211392	Non-significant	0.143077	-0.065327	NPX ~ NPC1 * Age_c + Sex + Error(SampleID)		0.89
CNTN1	ENSG00000018236	Cardiometabolic	Q12860	OID20307	NPC1	0.0680047	0.10187	0.211964	Non-significant	-0.178083	-0.173051	NPX ~ NPC1 * Age_c + Sex + Error(SampleID)	39	0.10
SERPINH1	ENSG00000149257	Oncology_II	P50454	OID31322	Age_c	0.12956	0.0244012	0.212224	Non-significant	-0.993712	-0.224755	NPX ~ NPC1 * Age_c + Sex + Error(SampleID)		9.91
PGM2	ENSG00000169299	Neurology_II	Q96G03	OID30904	Age_c	0.136524	0.0244046	0.212224	Non-significant	0.832072	0.0838902	NPX ~ NPC1 * Age_c + Sex + Error(SampleID)		1.34
WWP2	ENSG00000198373	Neurology	O00308	OID20926	Age_c	0.126172	0.0244997	0.212405	Non-significant	-0.642583	-0.0641224	NPX ~ NPC1 * Age_c + Sex + Error(SampleID)		0.86
CTF1	ENSG00000150281	Cardiometabolic	Q16619	OID20061	Age_c	0.148137	0.0245964	0.212599	Non-significant	-0.92667	-0.124388	NPX ~ NPC1 * Age_c + Sex + Error(SampleID)		2.18
DEFB116	ENSG00000215545	Neurology_II	Q30KQ4	OID30823	NPC1	0.0682519	0.102313	0.212731	Non-significant	0.567806	0.609297	NPX ~ NPC1 * Age_c + Sex + Error(SampleID)	38	1.18
BRD3	ENSG00000169925	Cardiometabolic_II	Q15059	OID30093	NPC1:Age_c	0.170883	0.00722262	0.21303	Non-significant	-0.937271	0.0915648	NPX ~ NPC1 * Age_c + Sex + Error(SampleID)		1.20
SRP14	ENSG00000140319	Oncology	P37108	OID21324	NPC1	0.0708436	0.102739	0.213358	Non-significant	-0.759133	-0.713602	NPX ~ NPC1 * Age_c + Sex + Error(SampleID)	37	1.58
SMOC2	ENSG00000112562	Inflammation	Q9H3U7	OID20730	NPC1	0.0676886	0.102764	0.213358	Non-significant	-0.328408	-0.26535	NPX ~ NPC1 * Age_c + Sex + Error(SampleID)	39	0.23
SPARCL1	ENSG00000152583	Cardiometabolic	Q14515	OID20361	Age_c	0.122689	0.0247607	0.213375	Non-significant	-0.532249	-0.0185941	NPX ~ NPC1 * Age_c + Sex + Error(SampleID)		0.07
CRYM	ENSG00000103316	Neurology_II	Q14894	OID30815	NPC1	0.0689115	0.103117	0.213936	Non-significant	0.745148	0.742712	NPX ~ NPC1 * Age_c + Sex + Error(SampleID)	38	1.76
CST6	ENSG00000175315	Cardiometabolic	Q15828	OID20293	Age_c	0.122314	0.024997	0.214121	Non-significant	0.0424533	0.0365537	NPX ~ NPC1 * Age_c + Sex + Error(SampleID)		0.28
QPCT	ENSG00000115828	Cardiometabolic	Q16769	OID20320	Age_c	0.122396	0.0249454	0.214121	Non-significant	0.0824192	0.0275508	NPX ~ NPC1 * Age_c + Sex + Error(SampleID)		0.16
HRAS	ENSG00000174775	Oncology_II	P01112	OID31263	NPC1	0.0677424	0.103314	0.214189	Non-significant	0.708691	0.743865	NPX ~ NPC1 * Age_c + Sex + Error(SampleID)	37	1.75
ANKMY2	ENSG00000106524	Inflammation_II	Q8IV38	OID30518	NPC1	0.0688973	0.103469	0.214355	Non-significant	-0.853752	-0.678395	NPX ~ NPC1 * Age_c + Sex + Error(SampleID)	39	1.51
TNF	ENSG00000232810	Neurology	P01375	OID20848	NPC1	0.0729348	0.103895	0.215033	Non-significant	0.132741	0.304545	NPX ~ NPC1 * Age_c + Sex + Error(SampleID)	35	0.26
CTBS	ENSG00000117151	Inflammation_II	Q01459	OID30710	NPC1	0.0632902	0.103947	0.215033	Non-significant	-0.0491133	-0.113894	NPX ~ NPC1 * Age_c + Sex + Error(SampleID)	39	0.04
METAP1D	ENSG00000172878	Inflammation	Q6UB28	OID20519	NPC1	0.0713082	0.104079	0.215151	Non-significant	0.370025	0.47243	NPX ~ NPC1 * Age_c + Sex + Error(SampleID)	37	0.77
OFD1	ENSG00000046651	Oncology_II	O75665	OID31268	NPC1	0.0738581	0.104267	0.21523	Non-significant	1.07192	1.49125	NPX ~ NPC1 * Age_c + Sex + Error(SampleID)	37	7.09
S100A3	ENSG00000188015	Oncology_II	P33764	OID31352	NPC1	0.0681087	0.104226	0.21523	Non-significant	-0.310089	-0.325483	NPX ~ NPC1 * Age_c + Sex + Error(SampleID)	39	0.35
TSPAN7	ENSG00000156298	Neurology_II	P41732	OID30810	NPC1	0.0658812	0.104607	0.215776	Non-significant	0.756947	1.11689	NPX ~ NPC1 * Age_c + Sex + Error(SampleID)	38	4.03
MYDGF	ENSG00000074842	Cardiometabolic_II	Q969H8	OID30313	Age_c	0.124841	0.0253212	0.215785	Non-significant	-2.48075	-0.0985703	NPX ~ NPC1 * Age_c + Sex + Error(SampleID)		2.06
ROBO1	ENSG00000169855	Inflammation	Q9Y6N7	OID20734	Age_c	0.121773	0.0253421	0.215785	Non-significant	0.301276	-0.0342615	NPX ~ NPC1 * Age_c + Sex + Error(SampleID)		0.25
TMED4	ENSG00000158604	Cardiometabolic_II	Q7Z7H5	OID30154	NPC1	0.0663935	0.104697	0.215806	Non-significant	0.941907	0.893538	NPX ~ NPC1 * Age_c + Sex + Error(SampleID)	39	2.63
CA3	ENSG00000164879	Cardiometabolic	P07451	OID20271	NPC1	0.0663304	0.104849	0.21583	Non-significant	0.81492	0.679967	NPX ~ NPC1 * Age_c + Sex + Error(SampleID)	39	1.53
KIFBP	ENSG00000198954	Oncology	Q96EK5	OID21320	NPC1	0.0701555	0.10486	0.21583	Non-significant	-0.671476	-0.583535	NPX ~ NPC1 * Age_c + Sex + Error(SampleID)	37	1.07
LMNB1	ENSG00000113368	Oncology_II	P20700	OID31501	NPC1	0.0676127	0.104957	0.215876	Non-significant	-0.836427	-0.71653	NPX ~ NPC1 * Age_c + Sex + Error(SampleID)	39	1.70
NLGN2	ENSG00000169992	Neurology_II	Q8NFZ4	OID30878	NPC1	0.0691269	0.105609	0.217059	Non-significant	0.790072	0.700908	NPX ~ NPC1 * Age_c + Sex + Error(SampleID)	38	1.60
MYCBP2	ENSG00000005810	Neurology_II	O75592	OID30996	NPC1	0.06787	0.106029	0.217662	Non-significant	-0.966498	-0.737461	NPX ~ NPC1 * Age_c + Sex + Error(SampleID)	39	1.81
SH2D1A	ENSG00000183918	Inflammation	O60880	OID20514	NPC1	0.0416461	0.10613	0.217662	Non-significant	-0.60215	-0.487831	NPX ~ NPC1 * Age_c + Sex + Error(SampleID)	37	0.83
GALNT2	ENSG00000143641	Oncology	Q10471	OID21423	NPC1	0.0632491	0.106063	0.217662	Non-significant	0.128366	0.124321	NPX ~ NPC1 * Age_c + Sex + Error(SampleID)	38	0.05
TFF2	ENSG00000160181	Inflammation	Q03403	OID20787	NPC1:Age_c	0.168828	0.00761701	0.217923	Non-significant	0.403632	0.0347805	NPX ~ NPC1 * Age_c + Sex + Error(SampleID)		0.18
CCDC80	ENSG00000091986	Cardiometabolic	Q76M96	OID20226	NPC1:Age_c	0.169269	0.00753062	0.217923	Non-significant	0.157342	-0.0313171	NPX ~ NPC1 * Age_c + Sex + Error(SampleID)		0.14
LRP1	ENSG00000123384	Oncology	Q07954	OID21293	NPC1:Age_c	0.177393	0.00758113	0.217923	Non-significant	0.0135018	0.0231142	NPX ~ NPC1 * Age_c + Sex + Error(SampleID)		0.08
SPINK5	ENSG00000133710	Neurology	Q9NQ38	OID21148	NPC1	0.06348	0.106413	0.218086	Non-significant	-0.0354917	-0.16316	NPX ~ NPC1 * Age_c + Sex + Error(SampleID)	39	0.09
PSME1	ENSG00000092010	Neurology	Q06323	OID20969	NPC1	0.067283	0.106612	0.218182	Non-significant	0.436772	0.447399	NPX ~ NPC1 * Age_c + Sex + Error(SampleID)	38	0.67
CTHRC1	ENSG00000164932	Cardiometabolic_II	Q96CG8	OID30393	NPC1	0.0643438	0.106605	0.218182	Non-significant	-0.192482	-0.295159	NPX ~ NPC1 * Age_c + Sex + Error(SampleID)	39	0.29
WWP2	ENSG00000198373	Neurology	O00308	OID20926	NPC1	0.0604229	0.106691	0.218186	Non-significant	-0.642583	-0.505348	NPX ~ NPC1 * Age_c + Sex + Error(SampleID)	38	0.86
ADAM8	ENSG00000151651	Neurology	P78325	OID21039	Age_c	0.121201	0.0257123	0.218288	Non-significant	-0.281203	-0.0385968	NPX ~ NPC1 * Age_c + Sex + Error(SampleID)		0.32
ACP5	ENSG00000102575	Cardiometabolic	P13686	OID20314	Age_c	0.120951	0.0258755	0.218377	Non-significant	0.87293	-0.0221442	NPX ~ NPC1 * Age_c + Sex + Error(SampleID)		0.11
AFM	ENSG00000079557	Inflammation_II	P43652	OID30741	Age_c	0.121019	0.0258309	0.218377	Non-significant	-0.222294	0.0178087	NPX ~ NPC1 * Age_c + Sex + Error(SampleID)		0.07
BRAP	ENSG00000089234	Oncology_II	Q7Z569	OID31506	NPC1	0.0676231	0.106869	0.218394	Non-significant	-0.982742	-0.737715	NPX ~ NPC1 * Age_c + Sex + Error(SampleID)	39	1.82
ENSA	ENSG00000143420	Oncology_II	O43768	OID31355	NPC1	0.0645732	0.106958	0.218421	Non-significant	0.587109	0.779665	NPX ~ NPC1 * Age_c + Sex + Error(SampleID)	39	2.03
MANF	ENSG00000145050	Inflammation	P55145	OID20707	Age_c	0.120789	0.0259817	0.218628	Non-significant	-3.70309	-0.100009	NPX ~ NPC1 * Age_c + Sex + Error(SampleID)		2.15
CEP170	ENSG00000143702	Cardiometabolic_II	Q5SW79	OID30240	Age_c	0.12365	0.026079	0.218804	Non-significant	-2.72397	-0.123233	NPX ~ NPC1 * Age_c + Sex + Error(SampleID)		3.07
CD83	ENSG00000112149	Inflammation	Q01151	OID20565	Age_c	0.126688	0.0261574	0.218819	Non-significant	1.36884	-0.028715	NPX ~ NPC1 * Age_c + Sex + Error(SampleID)		0.18
MYOM3	ENSG00000142661	Inflammation_II	Q5VTT5	OID30633	Sex	0.19592	0.00375664	0.219342	Non-significant	-1.1325	0.580112	NPX ~ NPC1 * Age_c + Sex + Error(SampleID)		1.48
SPARCL1	ENSG00000152583	Cardiometabolic	Q14515	OID20361	NPC1:Age_c	0.168165	0.00774858	0.219492	Non-significant	-0.532249	0.0223413	NPX ~ NPC1 * Age_c + Sex + Error(SampleID)		0.07
TAFA5	ENSG00000219438	Oncology	Q7Z5A7	OID21321	Age_c	0.126418	0.0263283	0.219608	Non-significant	0.612777	-0.0304914	NPX ~ NPC1 * Age_c + Sex + Error(SampleID)		0.20
IL17F	ENSG00000112116	Inflammation	Q96PD4	OID20456	NPC1	0.070256	0.107798	0.219978	Non-significant	0.651296	0.755477	NPX ~ NPC1 * Age_c + Sex + Error(SampleID)	36	1.56
GNGT1	ENSG00000127928	Neurology_II	P63211	OID30920	NPC1	0.0688214	0.108194	0.220629	Non-significant	1.27552	1.08421	NPX ~ NPC1 * Age_c + Sex + Error(SampleID)	35	3.50
TARM1	ENSG00000248385	Neurology_II	B6A8C7	OID30937	NPC1	0.0703081	0.108545	0.220879	Non-significant	-1.26364	-1.28445	NPX ~ NPC1 * Age_c + Sex + Error(SampleID)	35	4.93
KLB	ENSG00000134962	Neurology	Q86Z14	OID20888	NPC1	0.0696939	0.108625	0.220879	Non-significant	0.0689611	0.510312	NPX ~ NPC1 * Age_c + Sex + Error(SampleID)	35	0.75
S100P	ENSG00000163993	Cardiometabolic	P25815	OID20103	NPC1	0.0523842	0.108564	0.220879	Non-significant	-0.600774	-0.468223	NPX ~ NPC1 * Age_c + Sex + Error(SampleID)	32	0.65
PIGR	ENSG00000162896	Neurology	P01833	OID21102	NPC1	0.0654902	0.10841	0.220879	Non-significant	0.258572	0.283278	NPX ~ NPC1 * Age_c + Sex + Error(SampleID)	39	0.27
BRD3	ENSG00000169925	Cardiometabolic_II	Q15059	OID30093	NPC1	0.0681852	0.108821	0.22112	Non-significant	-0.937271	-0.596325	NPX ~ NPC1 * Age_c + Sex + Error(SampleID)	39	1.20
AGT	ENSG00000135744	Inflammation_II	P01019	OID30709	NPC1	0.06258	0.108928	0.22118	Non-significant	-0.128879	-0.214386	NPX ~ NPC1 * Age_c + Sex + Error(SampleID)	39	0.16
RSPO1	ENSG00000169218	Neurology	Q2MKA7	OID20938	Age_c	0.12284	0.026607	0.221287	Non-significant	0.042693	0.032604	NPX ~ NPC1 * Age_c + Sex + Error(SampleID)		0.23
HPCAL1	ENSG00000115756	Inflammation	P37235	OID20615	Age_c	0.125719	0.0267772	0.221572	Non-significant	-0.398771	-0.0587629	NPX ~ NPC1 * Age_c + Sex + Error(SampleID)		0.63
DDX39A	ENSG00000123136	Inflammation_II	O00148	OID30494	Age_c	0.119571	0.0267962	0.221572	Non-significant	-0.352764	-0.044533	NPX ~ NPC1 * Age_c + Sex + Error(SampleID)		0.43
CEBPB	ENSG00000172216	Cardiometabolic	P17676	OID20052	Age_c	0.143746	0.0270118	0.221819	Non-significant	-1.45402	-0.115219	NPX ~ NPC1 * Age_c + Sex + Error(SampleID)		1.94
PPY	ENSG00000108849	Oncology	P01298	OID21516	Age_c	0.1192	0.0270493	0.221819	Non-significant	-0.729262	-0.0858179	NPX ~ NPC1 * Age_c + Sex + Error(SampleID)		1.61
BPIFB1	ENSG00000125999	Cardiometabolic	Q8TDL5	OID20308	Age_c	0.119186	0.0270586	0.221819	Non-significant	-1.00624	-0.04989	NPX ~ NPC1 * Age_c + Sex + Error(SampleID)		0.54
EIF4EBP1	ENSG00000187840	Cardiometabolic	Q13541	OID20162	NPC1	0.0647006	0.109434	0.221973	Non-significant	0.993426	0.87765	NPX ~ NPC1 * Age_c + Sex + Error(SampleID)	39	2.61
EPHA10	ENSG00000183317	Neurology	Q5JZY3	OID20840	NPC1	0.0710651	0.109474	0.221973	Non-significant	0.607306	0.628316	NPX ~ NPC1 * Age_c + Sex + Error(SampleID)	35	1.15
LMOD1	ENSG00000163431	Cardiometabolic_II	P29536	OID30212	Age_c	0.121996	0.0271688	0.222085	Non-significant	0.1678	0.0379408	NPX ~ NPC1 * Age_c + Sex + Error(SampleID)		0.30
AHNAK2	ENSG00000185567	Cardiometabolic_II	Q8IVF2	OID30244	Age_c	0.121681	0.0273813	0.223185	Non-significant	-0.479302	0.0290754	NPX ~ NPC1 * Age_c + Sex + Error(SampleID)		0.17
TP73	ENSG00000078900	Neurology_II	O15350	OID30879	NPC1	0.0705922	0.110167	0.223221	Non-significant	1.72616	1.72609	NPX ~ NPC1 * Age_c + Sex + Error(SampleID)	35	8.99
IGFBP1	ENSG00000146678	Cardiometabolic	P08833	OID20246	Age_c	0.118578	0.0274784	0.22334	Non-significant	1.76248	-0.0918862	NPX ~ NPC1 * Age_c + Sex + Error(SampleID)		1.85
CST5	ENSG00000170367	Neurology	P28325	OID20995	Age_c	0.121419	0.0275597	0.223367	Non-significant	0.136292	-0.0517645	NPX ~ NPC1 * Age_c + Sex + Error(SampleID)		0.59
TRDMT1	ENSG00000107614	Oncology_II	O14717	OID31335	NPC1	0.0720648	0.110677	0.223952	Non-significant	0.695662	0.935975	NPX ~ NPC1 * Age_c + Sex + Error(SampleID)	37	2.90
ID4	ENSG00000172201	Oncology_II	P47928	OID31284	NPC1	0.0605096	0.110684	0.223952	Non-significant	0.756151	0.518455	NPX ~ NPC1 * Age_c + Sex + Error(SampleID)	37	0.89
MPHOSPH8	ENSG00000196199	Cardiometabolic	Q99549	OID20092	NPC1	0.0545004	0.11078	0.223988	Non-significant	-0.593862	-0.478137	NPX ~ NPC1 * Age_c + Sex + Error(SampleID)	32	0.69
MYOC	ENSG00000034971	Neurology	Q99972	OID21121	Age_c	0.118231	0.0277212	0.22404	Non-significant	-0.466278	0.0462872	NPX ~ NPC1 * Age_c + Sex + Error(SampleID)		0.47
OXT	ENSG00000101405	Neurology	P01178	OID21047	Age_c	0.117981	0.0278973	0.224828	Non-significant	0.406397	0.0615236	NPX ~ NPC1 * Age_c + Sex + Error(SampleID)		0.84
HMMR	ENSG00000072571	Oncology_II	O75330	OID31175	NPC1	0.0643875	0.111987	0.225974	Non-significant	0.973092	0.916919	NPX ~ NPC1 * Age_c + Sex + Error(SampleID)	39	2.89
HEBP1	ENSG00000013583	Cardiometabolic	Q9NRV9	OID20063	NPC1	0.0721181	0.112079	0.225974	Non-significant	-0.357053	-0.365303	NPX ~ NPC1 * Age_c + Sex + Error(SampleID)	32	0.40
ADAMTSL2	ENSG00000197859	Cardiometabolic_II	Q86TH1	OID30370	NPC1	0.0641481	0.112018	0.225974	Non-significant	0.294657	0.285034	NPX ~ NPC1 * Age_c + Sex + Error(SampleID)	39	0.28
PRELP	ENSG00000188783	Inflammation	P51888	OID20766	NPC1	0.0628028	0.11201	0.225974	Non-significant	-0.0779033	-0.19928	NPX ~ NPC1 * Age_c + Sex + Error(SampleID)	39	0.14
DSG2	ENSG00000046604	Neurology	Q14126	OID21113	NPC1	0.0631279	0.112349	0.22636	Non-significant	-0.0718967	-0.130644	NPX ~ NPC1 * Age_c + Sex + Error(SampleID)	39	0.06
MUCL3	ENSG00000168631	Oncology_II	Q3MIW9	OID31170	NPC1	0.0643313	0.112692	0.226732	Non-significant	0.714472	0.572076	NPX ~ NPC1 * Age_c + Sex + Error(SampleID)	39	1.13
GOLM2	ENSG00000166734	Neurology	Q6P4E1	OID21044	NPC1	0.0656638	0.112625	0.226732	Non-significant	-0.274392	-0.176154	NPX ~ NPC1 * Age_c + Sex + Error(SampleID)	39	0.11
SPACA5_SPACA5B		Neurology_II	Q96QH8	OID30990	NPC1	0.0628898	0.112801	0.226792	Non-significant	0.176973	0.18025	NPX ~ NPC1 * Age_c + Sex + Error(SampleID)	39	0.11
FOLR1	ENSG00000110195	Oncology	P15328	OID21529	NPC1	0.0621744	0.11316	0.227353	Non-significant	0.196261	0.182748	NPX ~ NPC1 * Age_c + Sex + Error(SampleID)	39	0.12
FAM20A	ENSG00000108950	Cardiometabolic_II	Q96MK3	OID30348	NPC1	0.0629459	0.113269	0.227412	Non-significant	-0.121841	-0.161457	NPX ~ NPC1 * Age_c + Sex + Error(SampleID)	38	0.09
DUSP13		Oncology_II	Q6B8I1	OID31394	Age_c	0.117373	0.0283298	0.227673	Non-significant	-0.503303	0.062741	NPX ~ NPC1 * Age_c + Sex + Error(SampleID)		0.87
IGF2BP3	ENSG00000136231	Cardiometabolic_II	O00425	OID30112	Age_c	0.11724	0.0284253	0.227801	Non-significant	-1.21639	-0.0804846	NPX ~ NPC1 * Age_c + Sex + Error(SampleID)		1.44
MMP3	ENSG00000149968	Neurology	P08254	OID21083	Sex	0.193711	0.00398156	0.227825	Non-significant	-0.672432	0.365969	NPX ~ NPC1 * Age_c + Sex + Error(SampleID)		0.60
LSM8	ENSG00000128534	Oncology_II	O95777	OID31269	NPC1	0.069271	0.113914	0.228345	Non-significant	-0.562825	-0.948184	NPX ~ NPC1 * Age_c + Sex + Error(SampleID)	37	3.03
RILPL2	ENSG00000150977	Cardiometabolic_II	Q969X0	OID30342	NPC1	0.0737641	0.113973	0.228345	Non-significant	-0.879788	-0.663337	NPX ~ NPC1 * Age_c + Sex + Error(SampleID)	38	1.46
ASGR1	ENSG00000141505	Neurology	P07306	OID20990	NPC1	0.0692774	0.113838	0.228345	Non-significant	-0.085325	-0.145005	NPX ~ NPC1 * Age_c + Sex + Error(SampleID)	38	0.07
LPL	ENSG00000175445	Cardiometabolic	P06858	OID20188	NPC1	0.0615549	0.114212	0.228664	Non-significant	0.282266	0.351725	NPX ~ NPC1 * Age_c + Sex + Error(SampleID)	39	0.43
DNM1	ENSG00000106976	Oncology_II	Q05193	OID31458	NPC1	0.0645365	0.114465	0.229011	Non-significant	-0.860213	-0.792477	NPX ~ NPC1 * Age_c + Sex + Error(SampleID)	39	2.19
RP2	ENSG00000102218	Oncology	O75695	OID21302	NPC1	0.0664775	0.114854	0.229627	Non-significant	-0.420416	-0.330738	NPX ~ NPC1 * Age_c + Sex + Error(SampleID)	37	0.36
CLNS1A	ENSG00000074201	Neurology_II	P54105	OID30929	NPC1	0.0686627	0.114989	0.229738	Non-significant	0.972941	0.896526	NPX ~ NPC1 * Age_c + Sex + Error(SampleID)	35	2.49
PAFAH2	ENSG00000158006	Oncology_II	Q99487	OID31286	NPC1:Age_c	0.17426	0.00819201	0.229778	Non-significant	-0.0113556	0.16228	NPX ~ NPC1 * Age_c + Sex + Error(SampleID)		3.66
TREML2	ENSG00000112195	Neurology	Q5T2D2	OID21120	Age_c	0.116542	0.0289323	0.230572	Non-significant	0.261418	-0.0335006	NPX ~ NPC1 * Age_c + Sex + Error(SampleID)		0.25
CD109	ENSG00000156535	Neurology	Q6YHK3	OID21108	Age_c	0.1166	0.0288899	0.230572	Non-significant	0.0477142	-0.0316168	NPX ~ NPC1 * Age_c + Sex + Error(SampleID)		0.22
SPON2	ENSG00000159674	Cardiometabolic	Q9BUD6	OID20221	NPC1	0.0645578	0.116256	0.232106	Non-significant	0.349881	0.227362	NPX ~ NPC1 * Age_c + Sex + Error(SampleID)	39	0.18
SERPINA4	ENSG00000100665	Inflammation_II	P29622	OID30774	NPC1	0.061127	0.11652	0.232471	Non-significant	-0.119212	-0.16738	NPX ~ NPC1 * Age_c + Sex + Error(SampleID)	39	0.10
ASGR2	ENSG00000161944	Inflammation_II	P07307	OID30679	NPC1	0.0632417	0.117057	0.2333	Non-significant	0.374503	0.311879	NPX ~ NPC1 * Age_c + Sex + Error(SampleID)	39	0.34
GPKOW	ENSG00000068394	Neurology	Q92917	OID20890	NPC1	0.0700042	0.117099	0.2333	Non-significant	-0.350555	-0.28138	NPX ~ NPC1 * Age_c + Sex + Error(SampleID)	35	0.24
GTPBP2	ENSG00000172432	Neurology_II	Q9BX10	OID30946	Age_c	0.128357	0.0294565	0.233413	Non-significant	-3.54745	-0.161927	NPX ~ NPC1 * Age_c + Sex + Error(SampleID)		5.36
ATOX1	ENSG00000177556	Oncology	O00244	OID21476	Age_c	0.115877	0.0294235	0.233413	Non-significant	-1.01824	-0.0943597	NPX ~ NPC1 * Age_c + Sex + Error(SampleID)		2.00
FLT3LG	ENSG00000090554	Inflammation	P49771	OID20661	Age_c	0.121666	0.0295336	0.233413	Non-significant	-0.167532	-0.0244865	NPX ~ NPC1 * Age_c + Sex + Error(SampleID)		0.11
TCL1A	ENSG00000100721	Neurology	P56279	OID20987	NPC1	0.060473	0.117522	0.23398	Non-significant	0.734076	0.646443	NPX ~ NPC1 * Age_c + Sex + Error(SampleID)	38	1.50
TIMP2	ENSG00000035862	Cardiometabolic_II	P16035	OID30318	NPC1	0.0630804	0.117791	0.234353	Non-significant	0.220009	0.257255	NPX ~ NPC1 * Age_c + Sex + Error(SampleID)	38	0.22
GCC1	ENSG00000179562	Neurology_II	Q96CN9	OID31147	NPC1	0.0640307	0.11818	0.234801	Non-significant	-0.937177	-0.648416	NPX ~ NPC1 * Age_c + Sex + Error(SampleID)	39	1.50
GPHA2	ENSG00000149735	Oncology_II	Q96T91	OID31437	NPC1	0.0612747	0.118141	0.234801	Non-significant	0.416722	0.498025	NPX ~ NPC1 * Age_c + Sex + Error(SampleID)	39	0.88
CEACAM5	ENSG00000105388	Oncology	P06731	OID21171	NPC1	0.0661176	0.118271	0.234819	Non-significant	0.834033	0.476381	NPX ~ NPC1 * Age_c + Sex + Error(SampleID)	36	0.76
PROC	ENSG00000115718	Cardiometabolic	P04070	OID20402	Age_c	0.115345	0.0298226	0.235048	Non-significant	0.0178425	0.0184457	NPX ~ NPC1 * Age_c + Sex + Error(SampleID)		0.08
MMP7	ENSG00000137673	Cardiometabolic	P09237	OID20087	Sex	0.228951	0.00420308	0.235784	Non-significant	0.136302	-0.132107	NPX ~ NPC1 * Age_c + Sex + Error(SampleID)		0.06
PLA2G10	ENSG00000069764	Neurology	O15496	OID21002	Age_c	0.117937	0.0300401	0.236112	Non-significant	-0.989178	-0.0416278	NPX ~ NPC1 * Age_c + Sex + Error(SampleID)		0.39
ADAMTS13	ENSG00000160323	Cardiometabolic	Q76LX8	OID20249	Age_c	0.114857	0.0301937	0.236669	Non-significant	0.223202	-0.0165783	NPX ~ NPC1 * Age_c + Sex + Error(SampleID)		0.06
GRIK2	ENSG00000164418	Neurology_II	Q13002	OID30977	NPC1	0.060372	0.119364	0.236824	Non-significant	-0.00231917	-0.361439	NPX ~ NPC1 * Age_c + Sex + Error(SampleID)	39	0.47
STC2	ENSG00000113739	Neurology	O76061	OID21157	Age_c	0.114634	0.0303645	0.237357	Non-significant	0.420248	0.0399985	NPX ~ NPC1 * Age_c + Sex + Error(SampleID)		0.36
GYS1	ENSG00000104812	Cardiometabolic	P13807	OID20097	Age_c	0.137959	0.0305554	0.237361	Non-significant	-1.94848	-0.142406	NPX ~ NPC1 * Age_c + Sex + Error(SampleID)		3.10
DAG1	ENSG00000173402	Inflammation	Q14118	OID20774	Age_c	0.114311	0.0306138	0.237361	Non-significant	-0.772387	-0.0510959	NPX ~ NPC1 * Age_c + Sex + Error(SampleID)		0.60
LAYN	ENSG00000204381	Neurology	Q6UX15	OID20970	Age_c	0.117266	0.0305428	0.237361	Non-significant	0.300056	-0.0274642	NPX ~ NPC1 * Age_c + Sex + Error(SampleID)		0.17
IL13RA1	ENSG00000131724	Oncology	P78552	OID21504	NPC1	0.0635922	0.120013	0.237946	Non-significant	-0.188598	-0.130199	NPX ~ NPC1 * Age_c + Sex + Error(SampleID)	39	0.06
STC1	ENSG00000159167	Neurology	P52823	OID21014	NPC1	0.0608932	0.120288	0.238328	Non-significant	0.229958	0.249114	NPX ~ NPC1 * Age_c + Sex + Error(SampleID)	39	0.22
APBB1IP	ENSG00000077420	Oncology	Q7Z5R6	OID21359	NPC1	0.0645217	0.120486	0.238553	Non-significant	-0.79572	-0.634717	NPX ~ NPC1 * Age_c + Sex + Error(SampleID)	37	1.39
ERP29	ENSG00000089248	Inflammation_II	P30040	OID30578	Age_c	0.113849	0.0309734	0.2395	Non-significant	-1.99012	-0.095268	NPX ~ NPC1 * Age_c + Sex + Error(SampleID)		2.08
BLVRB	ENSG00000090013	Neurology	P30043	OID21141	NPC1	0.0608283	0.121223	0.239848	Non-significant	0.734511	0.671832	NPX ~ NPC1 * Age_c + Sex + Error(SampleID)	39	1.64
RASSF2	ENSG00000101265	Oncology	P50749	OID21194	NPC1	0.0651194	0.121434	0.240099	Non-significant	-1.02954	-0.910763	NPX ~ NPC1 * Age_c + Sex + Error(SampleID)	36	2.81
LMOD1	ENSG00000163431	Oncology_II	P29536	OID31416	Age_c	0.11364	0.0311384	0.240126	Non-significant	0.178892	0.0391192	NPX ~ NPC1 * Age_c + Sex + Error(SampleID)		0.35
TMPRSS11D	ENSG00000153802	Neurology_II	O60235	OID31103	NPC1	0.0604145	0.121705	0.240468	Non-significant	0.283758	0.290737	NPX ~ NPC1 * Age_c + Sex + Error(SampleID)	39	0.31
UPK3A	ENSG00000100373	Neurology_II	O75631	OID30794	NPC1	0.0670512	0.121826	0.240542	Non-significant	0.953993	0.725896	NPX ~ NPC1 * Age_c + Sex + Error(SampleID)	38	1.88
LRCH4	ENSG00000077454	Cardiometabolic_II	O75427	OID30191	NPC1	0.0628123	0.122121	0.240819	Non-significant	-1.21531	-0.864349	NPX ~ NPC1 * Age_c + Sex + Error(SampleID)	39	2.72
CRYGD	ENSG00000118231	Neurology_II	P07320	OID31144	NPC1	0.0626316	0.122135	0.240819	Non-significant	-1.11197	-0.846272	NPX ~ NPC1 * Age_c + Sex + Error(SampleID)	39	2.61
CCN4	ENSG00000104415	Oncology	O95388	OID21444	Age_c	0.115951	0.0315522	0.242664	Non-significant	-0.0559178	-0.0307854	NPX ~ NPC1 * Age_c + Sex + Error(SampleID)		0.22
GPD1	ENSG00000167588	Oncology_II	P21695	OID31358	NPC1	0.0612425	0.123251	0.242852	Non-significant	0.446625	0.394995	NPX ~ NPC1 * Age_c + Sex + Error(SampleID)	39	0.57
PDCL2	ENSG00000163440	Oncology_II	Q8N4E4	OID31168	NPC1	0.0586871	0.123531	0.243235	Non-significant	0.413417	0.678365	NPX ~ NPC1 * Age_c + Sex + Error(SampleID)	39	1.69
ANG	ENSG00000214274	Cardiometabolic	P03950	OID20403	Age_c	0.11281	0.0317992	0.243907	Non-significant	0.190788	0.0262064	NPX ~ NPC1 * Age_c + Sex + Error(SampleID)		0.16
BNIP2	ENSG00000140299	Cardiometabolic_II	Q12982	OID30292	Age_c	0.115375	0.032005	0.244102	Non-significant	-2.51351	-0.0900127	NPX ~ NPC1 * Age_c + Sex + Error(SampleID)		1.88
BRSK2	ENSG00000174672	Neurology_II	Q8IWQ3	OID31042	Age_c	0.112235	0.0322652	0.244102	Non-significant	-1.22986	-0.071668	NPX ~ NPC1 * Age_c + Sex + Error(SampleID)		1.20
TNFSF11	ENSG00000120659	Inflammation	O14788	OID20592	Age_c	0.118367	0.0319843	0.244102	Non-significant	0.254668	-0.0544822	NPX ~ NPC1 * Age_c + Sex + Error(SampleID)		0.69
DYNLT3	ENSG00000165169	Oncology_II	P51808	OID31415	Age_c	0.11243	0.0321068	0.244102	Non-significant	-0.494023	-0.0493389	NPX ~ NPC1 * Age_c + Sex + Error(SampleID)		0.57
FASLG	ENSG00000117560	Inflammation	P48023	OID20665	Age_c	0.11804	0.0322381	0.244102	Non-significant	0.737883	-0.0319355	NPX ~ NPC1 * Age_c + Sex + Error(SampleID)		0.20
XG	ENSG00000124343	Cardiometabolic	P55808	OID20259	Age_c	0.112148	0.0323365	0.244102	Non-significant	-0.100012	0.0224064	NPX ~ NPC1 * Age_c + Sex + Error(SampleID)		0.12
MMUT	ENSG00000146085	Cardiometabolic_II	P22033	OID30159	NPC1	0.0597075	0.124202	0.24422	Non-significant	0.801632	0.809093	NPX ~ NPC1 * Age_c + Sex + Error(SampleID)	39	2.41
FHIP2A	ENSG00000151553	Cardiometabolic_II	Q5W0V3	OID30187	NPC1	0.06168	0.124171	0.24422	Non-significant	-0.522033	-0.427697	NPX ~ NPC1 * Age_c + Sex + Error(SampleID)	39	0.67
CDH5	ENSG00000179776	Cardiometabolic	P33151	OID20243	Age_c	0.112007	0.0324522	0.244307	Non-significant	-0.0716025	-0.0228814	NPX ~ NPC1 * Age_c + Sex + Error(SampleID)		0.12
CRIM1	ENSG00000150938	Inflammation	Q9NZV1	OID20701	Age_c	0.111907	0.0325344	0.244307	Non-significant	0.464153	0.01804	NPX ~ NPC1 * Age_c + Sex + Error(SampleID)		0.08
NCLN	ENSG00000125912	Inflammation	Q969V3	OID20448	NPC1	0.0642725	0.124594	0.244388	Non-significant	-0.754568	-0.825891	NPX ~ NPC1 * Age_c + Sex + Error(SampleID)	36	2.04
LYAR	ENSG00000145220	Oncology	Q9NX58	OID21264	NPC1	0.0642558	0.12445	0.244388	Non-significant	-0.43634	-0.540552	NPX ~ NPC1 * Age_c + Sex + Error(SampleID)	36	1.01
FGF12	ENSG00000114279	Inflammation_II	P61328	OID30454	NPC1	0.0584348	0.124473	0.244388	Non-significant	0.332173	0.410495	NPX ~ NPC1 * Age_c + Sex + Error(SampleID)	39	0.62
PRG3	ENSG00000156575	Cardiometabolic_II	Q9Y2Y8	OID30383	NPC1	0.0585329	0.124628	0.244388	Non-significant	0.1997	0.323557	NPX ~ NPC1 * Age_c + Sex + Error(SampleID)	39	0.39
NPPC	ENSG00000163273	Inflammation	P23582	OID20568	Age_c	0.117477	0.0326795	0.244415	Non-significant	-0.135054	-0.0634589	NPX ~ NPC1 * Age_c + Sex + Error(SampleID)		0.94
PBXIP1	ENSG00000163346	Oncology_II	Q96AQ6	OID31435	Age_c	0.111683	0.0327197	0.244415	Non-significant	0.169014	0.0369244	NPX ~ NPC1 * Age_c + Sex + Error(SampleID)		0.32
MYBPC2	ENSG00000086967	Cardiometabolic_II	Q14324	OID30199	Sex	0.192547	0.00461929	0.244737	Non-significant	0.137295	0.578814	NPX ~ NPC1 * Age_c + Sex + Error(SampleID)		1.52
TAFA5	ENSG00000219438	Oncology	Q7Z5A7	OID21321	Sex	0.198166	0.00451553	0.244737	Non-significant	0.612777	-0.215633	NPX ~ NPC1 * Age_c + Sex + Error(SampleID)		0.20
CXCL16	ENSG00000161921	Cardiometabolic	Q9H2A7	OID20282	Sex	0.188385	0.0045792	0.244737	Non-significant	0.612493	-0.15088	NPX ~ NPC1 * Age_c + Sex + Error(SampleID)		0.11
ENPEP	ENSG00000138792	Cardiometabolic_II	Q07075	OID30135	NPC1	0.0594105	0.124957	0.244864	Non-significant	0.623219	0.7877	NPX ~ NPC1 * Age_c + Sex + Error(SampleID)	39	2.30
[truncated: 9,445 more rows]

## Sheet: ST3_migvsnomig
Assay	GeneID	Panel	UniProt	OlinkID	Effect	pes	p.value	Adjusted_pval	Threshold	log2FC	estimate	formula	df	MSE
ZP4	ENSG00000116996	Oncology_II	Q12836	OID31185	Sex	0.671198	3.53093e-13	1.0102e-09	Significant	-0.866831	-2.1936	NPX ~ Mig * Age_c + NSS_17_c + ANO_c + Sex + Error(SampleID)		2.44
COL2A1	ENSG00000139219	Cardiometabolic_II	P02458	OID30286	Age_c	0.586566	9.17745e-11	2.62567e-07	Significant	-0.427995	-0.155946	NPX ~ Mig * Age_c + NSS_17_c + ANO_c + Sex + Error(SampleID)		0.76
INSL3	ENSG00000248099	Neurology_II	P51460	OID31129	Sex	0.571647	2.17491e-10	3.1112e-07	Significant	-0.623026	1.92276	NPX ~ Mig * Age_c + NSS_17_c + ANO_c + Sex + Error(SampleID)		2.86
EDDM3B	ENSG00000181552	Oncology_II	P56851	OID31365	Sex	0.545278	9.32549e-10	8.89341e-07	Significant	-0.450412	0.892409	NPX ~ Mig * Age_c + NSS_17_c + ANO_c + Sex + Error(SampleID)		0.69
COL9A1	ENSG00000112280	Inflammation	P20849	OID20550	Age_c	0.551565	3.4432e-09	2.86502e-06	Significant	-0.638132	-0.252219	NPX ~ Mig * Age_c + NSS_17_c + ANO_c + Sex + Error(SampleID)		1.81
ACAN	ENSG00000157766	Cardiometabolic	P16112	OID20159	Age_c	0.549545	2.52804e-09	2.86502e-06	Significant	-0.21418	-0.0911666	NPX ~ Mig * Age_c + NSS_17_c + ANO_c + Sex + Error(SampleID)		0.29
OMD	ENSG00000127083	Inflammation	Q99983	OID20725	Age_c	0.5173	4.00563e-09	2.86502e-06	Significant	-0.289287	-0.0608926	NPX ~ Mig * Age_c + NSS_17_c + ANO_c + Sex + Error(SampleID)		0.15
KLK4	ENSG00000167749	Oncology	Q9Y5K2	OID21391	Age_c	0.514433	6.71052e-09	3.83976e-06	Significant	-0.276099	-0.204083	NPX ~ Mig * Age_c + NSS_17_c + ANO_c + Sex + Error(SampleID)		1.65
NELL2	ENSG00000184613	Inflammation	Q99435	OID20706	Age_c	0.500422	9.28063e-09	4.42531e-06	Significant	-0.227151	-0.0689786	NPX ~ Mig * Age_c + NSS_17_c + ANO_c + Sex + Error(SampleID)		0.21
PTPRR	ENSG00000153233	Neurology_II	Q15256	OID31099	Age_c	0.493969	1.27044e-08	4.69574e-06	Significant	-0.402719	-0.103311	NPX ~ Mig * Age_c + NSS_17_c + ANO_c + Sex + Error(SampleID)		0.49
ROBO2	ENSG00000185008	Neurology	Q9HCK4	OID21007	Age_c	0.493287	1.31303e-08	4.69574e-06	Significant	-0.267749	-0.0399578	NPX ~ Mig * Age_c + NSS_17_c + ANO_c + Sex + Error(SampleID)		0.07
SPINT3	ENSG00000101446	Oncology_II	P49223	OID31509	Sex	0.49548	1.18081e-08	8.44575e-06	Significant	-1.34597	2.28242	NPX ~ Mig * Age_c + NSS_17_c + ANO_c + Sex + Error(SampleID)		5.48
MATN3	ENSG00000132031	Neurology	O15232	OID20979	Age_c	0.488399	3.31295e-08	1.05315e-05	Significant	-0.234433	-0.135785	NPX ~ Mig * Age_c + NSS_17_c + ANO_c + Sex + Error(SampleID)		0.83
MIA	ENSG00000261857	Oncology	Q16674	OID21531	Age_c	0.463856	5.23711e-08	1.45668e-05	Significant	-0.209415	-0.0658891	NPX ~ Mig * Age_c + NSS_17_c + ANO_c + Sex + Error(SampleID)		0.22
FCRL1	ENSG00000163534	Cardiometabolic	Q96LA6	OID20172	Age_c	0.484388	5.60064e-08	1.45668e-05	Significant	-0.370481	-0.06339	NPX ~ Mig * Age_c + NSS_17_c + ANO_c + Sex + Error(SampleID)		0.18
SLITRK1	ENSG00000178235	Inflammation_II	Q96PX8	OID30510	Age_c	0.452412	8.79482e-08	2.09683e-05	Significant	-0.475515	-0.0787039	NPX ~ Mig * Age_c + NSS_17_c + ANO_c + Sex + Error(SampleID)		0.33
IGFBP6	ENSG00000167779	Cardiometabolic	P24592	OID20413	Age_c	0.440645	1.48284e-07	3.26339e-05	Significant	-0.246792	0.0459068	NPX ~ Mig * Age_c + NSS_17_c + ANO_c + Sex + Error(SampleID)		0.12
SCG3	ENSG00000104112	Inflammation	Q8WXD2	OID20728	Age_c	0.434238	1.96213e-07	4.00975e-05	Significant	-0.385318	-0.0683019	NPX ~ Mig * Age_c + NSS_17_c + ANO_c + Sex + Error(SampleID)		0.27
NCAN	ENSG00000130287	Neurology	O14594	OID21055	Age_c	0.43103	2.25488e-07	4.30081e-05	Significant	-0.531588	-0.0923927	NPX ~ Mig * Age_c + NSS_17_c + ANO_c + Sex + Error(SampleID)		0.50
AMBN	ENSG00000178522	Inflammation	Q9NP70	OID20437	Age_c	0.423251	4.18891e-07	7.4903e-05	Significant	-0.512171	-0.184586	NPX ~ Mig * Age_c + NSS_17_c + ANO_c + Sex + Error(SampleID)		2.11
SEZ6L2	ENSG00000174938	Oncology	Q6UXD5	OID21289	Age_c	0.431371	5.34181e-07	8.49051e-05	Significant	-0.153508	-0.0510654	NPX ~ Mig * Age_c + NSS_17_c + ANO_c + Sex + Error(SampleID)		0.15
EPHA4	ENSG00000116106	Inflammation_II	P54764	OID30622	Age_c	0.411621	5.15135e-07	8.49051e-05	Significant	-0.226689	-0.0497713	NPX ~ Mig * Age_c + NSS_17_c + ANO_c + Sex + Error(SampleID)		0.16
CHAD	ENSG00000136457	Inflammation_II	O15335	OID30660	Age_c	0.407374	6.15105e-07	8.79908e-05	Significant	-0.216183	-0.0686774	NPX ~ Mig * Age_c + NSS_17_c + ANO_c + Sex + Error(SampleID)		0.31
POSTN	ENSG00000133110	Cardiometabolic_II	Q15063	OID30410	Age_c	0.408022	5.9871e-07	8.79908e-05	Significant	-0.176553	-0.0683446	NPX ~ Mig * Age_c + NSS_17_c + ANO_c + Sex + Error(SampleID)		0.30
COL5A1	ENSG00000130635	Inflammation_II	P20908	OID30587	Age_c	0.406115	6.48159e-07	8.83039e-05	Significant	-0.302816	-0.0752935	NPX ~ Mig * Age_c + NSS_17_c + ANO_c + Sex + Error(SampleID)		0.37
NRP2	ENSG00000118257	Neurology	O60462	OID21081	Age_c	0.389796	1.26572e-06	0.000164601	Significant	-0.277785	-0.0477974	NPX ~ Mig * Age_c + NSS_17_c + ANO_c + Sex + Error(SampleID)		0.16
CCN5	ENSG00000064205	Neurology	O76076	OID21068	Age_c	0.385539	1.50306e-06	0.000186968	Significant	0.172892	0.122351	NPX ~ Mig * Age_c + NSS_17_c + ANO_c + Sex + Error(SampleID)		1.06
PTPRZ1	ENSG00000106278	Cardiometabolic_II	P23471	OID30343	Age_c	0.388707	1.70853e-06	0.000195525	Significant	-0.446341	-0.075835	NPX ~ Mig * Age_c + NSS_17_c + ANO_c + Sex + Error(SampleID)		0.41
BCAT1	ENSG00000060982	Cardiometabolic_II	P54687	OID30312	Age_c	0.389425	1.6606e-06	0.000195525	Significant	-0.0378388	-0.0714873	NPX ~ Mig * Age_c + NSS_17_c + ANO_c + Sex + Error(SampleID)		0.36
PTPRN2	ENSG00000155093	Neurology	Q92932	OID20912	Age_c	0.394251	1.77858e-06	0.000195712	Significant	-0.531735	-0.071709	NPX ~ Mig * Age_c + NSS_17_c + ANO_c + Sex + Error(SampleID)		0.34
TNFRSF8	ENSG00000120949	Neurology	P28908	OID21049	Age_c	0.377147	2.10235e-06	0.000222772	Significant	-0.246295	-0.0704162	NPX ~ Mig * Age_c + NSS_17_c + ANO_c + Sex + Error(SampleID)		0.37
MMP13	ENSG00000137745	Neurology	P45452	OID20807	Age_c	0.395756	2.83322e-06	0.000289494	Significant	-0.315409	-0.108695	NPX ~ Mig * Age_c + NSS_17_c + ANO_c + Sex + Error(SampleID)		0.81
DMP1	ENSG00000152592	Cardiometabolic_II	Q13316	OID30213	Age_c	0.366491	3.20001e-06	0.000314416	Significant	-0.302205	-0.0836805	NPX ~ Mig * Age_c + NSS_17_c + ANO_c + Sex + Error(SampleID)		0.54
CDH15	ENSG00000129910	Neurology	P55291	OID21005	Age_c	0.364353	3.47877e-06	0.000314416	Significant	-0.132408	-0.0631082	NPX ~ Mig * Age_c + NSS_17_c + ANO_c + Sex + Error(SampleID)		0.31
KIAA0319	ENSG00000137261	Neurology_II	Q5VV43	OID31094	Age_c	0.365711	3.29909e-06	0.000314416	Significant	-0.407236	-0.0575353	NPX ~ Mig * Age_c + NSS_17_c + ANO_c + Sex + Error(SampleID)		0.26
CD22	ENSG00000012124	Inflammation	P20273	OID20637	Age_c	0.37023	3.51671e-06	0.000314416	Significant	-0.412036	-0.0530375	NPX ~ Mig * Age_c + NSS_17_c + ANO_c + Sex + Error(SampleID)		0.20
CNTN5	ENSG00000149972	Neurology	O94779	OID21006	Age_c	0.363279	3.62738e-06	0.000314483	Significant	-0.344617	-0.0616004	NPX ~ Mig * Age_c + NSS_17_c + ANO_c + Sex + Error(SampleID)		0.30
ITGA2	ENSG00000164171	Inflammation_II	P17301	OID30570	NSS_17_c	0.427408	2.63606e-07	0.000377088	Significant	-0.28436	-0.0416678	NPX ~ Mig * Age_c + NSS_17_c + ANO_c + Sex + Error(SampleID)		0.22
ITGAV	ENSG00000138448	Oncology	P06756	OID21416	NSS_17_c	0.44827	1.43902e-07	0.000377088	Significant	-0.112049	-0.0242886	NPX ~ Mig * Age_c + NSS_17_c + ANO_c + Sex + Error(SampleID)		0.07
UNC5D	ENSG00000156687	Inflammation_II	Q6UXZ4	OID30447	Age_c	0.357424	4.55204e-06	0.00038304	Significant	-0.293245	-0.0683128	NPX ~ Mig * Age_c + NSS_17_c + ANO_c + Sex + Error(SampleID)		0.37
MMP3	ENSG00000149968	Neurology	P08254	OID21083	Age_c	0.355848	4.83723e-06	0.000392382	Significant	-0.178305	0.107639	NPX ~ Mig * Age_c + NSS_17_c + ANO_c + Sex + Error(SampleID)		0.94
FGFBP2	ENSG00000137441	Cardiometabolic_II	Q9BYJ0	OID30395	Age_c	0.355316	4.93735e-06	0.000392382	Significant	-0.15356	-0.0932006	NPX ~ Mig * Age_c + NSS_17_c + ANO_c + Sex + Error(SampleID)		0.70
TNFRSF9	ENSG00000049249	Neurology	Q07011	OID20985	Age_c	0.364744	5.50108e-06	0.000414173	Significant	-0.392218	-0.0526687	NPX ~ Mig * Age_c + NSS_17_c + ANO_c + Sex + Error(SampleID)		0.21
CDON	ENSG00000064309	Inflammation	Q4KMG0	OID20754	Age_c	0.352864	5.4252e-06	0.000414173	Significant	-0.222166	-0.0424179	NPX ~ Mig * Age_c + NSS_17_c + ANO_c + Sex + Error(SampleID)		0.15
KLK3	ENSG00000142515	Cardiometabolic_II	P07288	OID30364	Sex	0.399629	8.47398e-07	0.000484881	Significant	-0.359654	0.590362	NPX ~ Mig * Age_c + NSS_17_c + ANO_c + Sex + Error(SampleID)		0.54
PODXL2	ENSG00000114631	Oncology	Q9NZ53	OID21487	Age_c	0.344209	7.54686e-06	0.00055363	Significant	-0.244234	-0.0409108	NPX ~ Mig * Age_c + NSS_17_c + ANO_c + Sex + Error(SampleID)		0.14
CD5	ENSG00000110448	Oncology	P06127	OID21449	Age_c	0.348382	8.0559e-06	0.000576198	Significant	-0.310916	-0.0429317	NPX ~ Mig * Age_c + NSS_17_c + ANO_c + Sex + Error(SampleID)		0.14
ODAM	ENSG00000109205	Neurology	A1E959	OID20793	Age_c	0.365122	8.72115e-06	0.000608566	Significant	-0.580939	-0.118336	NPX ~ Mig * Age_c + NSS_17_c + ANO_c + Sex + Error(SampleID)		1.09
SERPINA9	ENSG00000170054	Oncology	Q86WD7	OID21284	Age_c	0.357799	8.98275e-06	0.000611896	Significant	-0.755291	-0.101886	NPX ~ Mig * Age_c + NSS_17_c + ANO_c + Sex + Error(SampleID)		0.81
ENO2	ENSG00000111674	Neurology	P09104	OID21046	Age_c	0.338632	9.31579e-06	0.000619825	Significant	-0.398493	-0.0778214	NPX ~ Mig * Age_c + NSS_17_c + ANO_c + Sex + Error(SampleID)		0.53
CCN3	ENSG00000136999	Cardiometabolic	P48745	OID20299	Age_c	0.332385	1.17718e-05	0.000765432	Significant	-0.535254	-0.0625129	NPX ~ Mig * Age_c + NSS_17_c + ANO_c + Sex + Error(SampleID)		0.35
MEGF11	ENSG00000157890	Cardiometabolic_II	A6BM72	OID30099	Age_c	0.327483	1.4125e-05	0.000898036	Significant	-0.471307	-0.0500315	NPX ~ Mig * Age_c + NSS_17_c + ANO_c + Sex + Error(SampleID)		0.23
TG	ENSG00000042832	Oncology_II	P01266	OID31359	Age_c	0.325233	1.53516e-05	0.00091502	Significant	-0.321064	0.11836	NPX ~ Mig * Age_c + NSS_17_c + ANO_c + Sex + Error(SampleID)		1.30
MB	ENSG00000198125	Cardiometabolic	P02144	OID20263	Age_c	0.325989	1.49282e-05	0.00091502	Significant	-0.460435	0.064807	NPX ~ Mig * Age_c + NSS_17_c + ANO_c + Sex + Error(SampleID)		0.39
ROBO1	ENSG00000169855	Inflammation	Q9Y6N7	OID20734	Age_c	0.325655	1.51136e-05	0.00091502	Significant	-0.335387	-0.0469867	NPX ~ Mig * Age_c + NSS_17_c + ANO_c + Sex + Error(SampleID)		0.20
GOT1	ENSG00000120053	Cardiometabolic_II	P17174	OID30417	Age_c	0.322297	1.71067e-05	0.00099882	Significant	-0.43486	-0.0689563	NPX ~ Mig * Age_c + NSS_17_c + ANO_c + Sex + Error(SampleID)		0.45
ITGA11	ENSG00000137809	Inflammation	Q9UKX5	OID20581	NSS_17_c	0.421184	1.06965e-06	0.00102009	Significant	-0.347875	-0.0358111	NPX ~ Mig * Age_c + NSS_17_c + ANO_c + Sex + Error(SampleID)		0.16
ENPP2	ENSG00000136960	Cardiometabolic	Q13822	OID20288	Age_c	0.316614	2.10698e-05	0.00120561	Significant	-0.126831	-0.0286168	NPX ~ Mig * Age_c + NSS_17_c + ANO_c + Sex + Error(SampleID)		0.08
MYBPC1	ENSG00000196091	Cardiometabolic_II	Q00872	OID30296	Age_c	0.320762	2.2175e-05	0.00123383	Significant	-0.494969	0.11535	NPX ~ Mig * Age_c + NSS_17_c + ANO_c + Sex + Error(SampleID)		1.28
SCRG1	ENSG00000164106	Cardiometabolic_II	O75711	OID30333	Age_c	0.319602	2.312e-05	0.00123383	Significant	-0.29846	-0.0730245	NPX ~ Mig * Age_c + NSS_17_c + ANO_c + Sex + Error(SampleID)		0.52
BCAN	ENSG00000132692	Neurology	Q96GW7	OID20998	Age_c	0.32564	2.28686e-05	0.00123383	Significant	-0.428318	-0.0414861	NPX ~ Mig * Age_c + NSS_17_c + ANO_c + Sex + Error(SampleID)		0.15
LAMB1	ENSG00000091136	Cardiometabolic_II	P07942	OID30280	Age_c	0.313869	2.3288e-05	0.00123383	Significant	-0.323998	-0.0312006	NPX ~ Mig * Age_c + NSS_17_c + ANO_c + Sex + Error(SampleID)		0.09
CD1C	ENSG00000158481	Oncology	P29017	OID21483	Age_c	0.31137	2.55023e-05	0.00132658	Significant	-0.129355	-0.0221039	NPX ~ Mig * Age_c + NSS_17_c + ANO_c + Sex + Error(SampleID)		0.05
MYOM3	ENSG00000142661	Inflammation_II	Q5VTT5	OID30633	Age_c	0.307091	2.97735e-05	0.00152111	Significant	-0.382345	0.105192	NPX ~ Mig * Age_c + NSS_17_c + ANO_c + Sex + Error(SampleID)		1.11
NAGPA	ENSG00000103174	Inflammation_II	Q9UK23	OID30643	Age_c	0.300938	3.71444e-05	0.00186439	Significant	-0.189162	-0.0211842	NPX ~ Mig * Age_c + NSS_17_c + ANO_c + Sex + Error(SampleID)		0.05
SEZ6L	ENSG00000100095	Oncology	Q9BYH1	OID21488	Age_c	0.298607	4.03724e-05	0.00195772	Significant	-0.495029	-0.0652064	NPX ~ Mig * Age_c + NSS_17_c + ANO_c + Sex + Error(SampleID)		0.45
BSG	ENSG00000172270	Inflammation	P35613	OID20626	Age_c	0.30412	4.01063e-05	0.00195772	Significant	-0.145786	-0.0290827	NPX ~ Mig * Age_c + NSS_17_c + ANO_c + Sex + Error(SampleID)		0.08
FABP4	ENSG00000170323	Cardiometabolic	P15090	OID20245	Sex	0.355972	4.8141e-06	0.00196759	Significant	-0.252867	-0.375604	NPX ~ Mig * Age_c + NSS_17_c + ANO_c + Sex + Error(SampleID)		0.26
CD99	ENSG00000002586	Neurology	P14209	OID21110	Sex	0.358952	4.29093e-06	0.00196759	Significant	-0.0711219	0.156556	NPX ~ Mig * Age_c + NSS_17_c + ANO_c + Sex + Error(SampleID)		0.05
ITGB1	ENSG00000150093	Cardiometabolic	P05556	OID20376	NSS_17_c	0.36838	2.97185e-06	0.00212561	Significant	-0.204519	-0.0176784	NPX ~ Mig * Age_c + NSS_17_c + ANO_c + Sex + Error(SampleID)		0.05
EFCAB2	ENSG00000203666	Oncology_II	Q5VUJ9	OID31313	Mig:Age_c	0.415122	7.75625e-07	0.00221906	Significant	-0.177826	-0.0499998	NPX ~ Mig * Age_c + NSS_17_c + ANO_c + Sex + Error(SampleID)		0.53
WFIKKN2	ENSG00000173714	Inflammation	Q8TEU8	OID20785	Age_c	0.293418	4.85618e-05	0.00231559	Significant	-0.536553	-0.0582854	NPX ~ Mig * Age_c + NSS_17_c + ANO_c + Sex + Error(SampleID)		0.36
CR2	ENSG00000117322	Cardiometabolic	P20023	OID20393	Age_c	0.289697	5.53991e-05	0.00259831	Significant	-0.0416491	-0.0495527	NPX ~ Mig * Age_c + NSS_17_c + ANO_c + Sex + Error(SampleID)		0.27
COMP	ENSG00000105664	Cardiometabolic	P49747	OID20405	NSS_17_c	0.357354	4.56419e-06	0.00261163	Significant	-0.532083	-0.0338439	NPX ~ Mig * Age_c + NSS_17_c + ANO_c + Sex + Error(SampleID)		0.19
CALB1	ENSG00000104327	Oncology	P05937	OID21306	Age_c	0.300832	6.56847e-05	0.00302026	Significant	-0.305112	-0.0751989	NPX ~ Mig * Age_c + NSS_17_c + ANO_c + Sex + Error(SampleID)		0.57
NRCAM	ENSG00000091129	Cardiometabolic	Q92823	OID20229	Age_c	0.300462	6.6507e-05	0.00302026	Significant	-0.255919	-0.0331532	NPX ~ Mig * Age_c + NSS_17_c + ANO_c + Sex + Error(SampleID)		0.11
CD72	ENSG00000137101	Inflammation_II	P21854	OID30641	Age_c	0.2798	7.84164e-05	0.00350546	Significant	-0.222364	-0.0451176	NPX ~ Mig * Age_c + NSS_17_c + ANO_c + Sex + Error(SampleID)		0.23
OBP2B	ENSG00000171102	Neurology	Q9NPH6	OID20980	Sex	0.348204	1.01453e-05	0.00362822	Significant	-0.0119964	0.564335	NPX ~ Mig * Age_c + NSS_17_c + ANO_c + Sex + Error(SampleID)		0.63
SYT1	ENSG00000067715	Neurology_II	P21579	OID31089	Age_c	0.277462	8.5073e-05	0.00369839	Significant	-0.299092	-0.0607277	NPX ~ Mig * Age_c + NSS_17_c + ANO_c + Sex + Error(SampleID)		0.43
PENK	ENSG00000181195	Inflammation_II	P01210	OID30666	Age_c	0.27738	8.53177e-05	0.00369839	Significant	-0.462777	-0.0557746	NPX ~ Mig * Age_c + NSS_17_c + ANO_c + Sex + Error(SampleID)		0.36
FAP	ENSG00000078098	Cardiometabolic	Q12884	OID20330	Age_c	0.27661	8.76321e-05	0.00374202	Significant	-0.376313	-0.0463854	NPX ~ Mig * Age_c + NSS_17_c + ANO_c + Sex + Error(SampleID)		0.25
IGSF3	ENSG00000143061	Oncology	O75054	OID21312	Age_c	0.291623	8.93878e-05	0.00376086	Significant	-0.351251	-0.0579032	NPX ~ Mig * Age_c + NSS_17_c + ANO_c + Sex + Error(SampleID)		0.36
ACRV1	ENSG00000134940	Inflammation_II	P26436	OID30513	Age_c	0.275375	9.14747e-05	0.00379289	Significant	-0.37533	0.0711384	NPX ~ Mig * Age_c + NSS_17_c + ANO_c + Sex + Error(SampleID)		0.59
LAMA4	ENSG00000112769	Inflammation	Q16363	OID20769	Age_c	0.274571	9.40641e-05	0.00379813	Significant	-0.286238	-0.0466784	NPX ~ Mig * Age_c + NSS_17_c + ANO_c + Sex + Error(SampleID)		0.26
DNER	ENSG00000187957	Inflammation	Q8NFT8	OID20712	Age_c	0.274512	9.42562e-05	0.00379813	Significant	-0.1993	-0.0268278	NPX ~ Mig * Age_c + NSS_17_c + ANO_c + Sex + Error(SampleID)		0.08
PRELP	ENSG00000188783	Inflammation	P51888	OID20766	Age_c	0.273863	9.64024e-05	0.00383066	Significant	-0.196613	0.0346116	NPX ~ Mig * Age_c + NSS_17_c + ANO_c + Sex + Error(SampleID)		0.14
SCT	ENSG00000070031	Neurology_II	P09683	OID30951	Age_c	0.277935	9.94284e-05	0.00389677	Significant	-0.179055	0.0524454	NPX ~ Mig * Age_c + NSS_17_c + ANO_c + Sex + Error(SampleID)		0.30
ADGRG2	ENSG00000173698	Cardiometabolic	Q8IZP9	OID20189	NSS_17_c	0.360379	8.17847e-06	0.00389977	Significant	-0.25641	-0.0283422	NPX ~ Mig * Age_c + NSS_17_c + ANO_c + Sex + Error(SampleID)		0.13
CD80	ENSG00000121594	Cardiometabolic_II	P33681	OID30291	Age_c	0.276291	0.000105162	0.00406577	Significant	-0.153967	-0.0421374	NPX ~ Mig * Age_c + NSS_17_c + ANO_c + Sex + Error(SampleID)		0.21
NPTXR	ENSG00000221890	Cardiometabolic	O95502	OID20191	Age_c	0.284785	0.000112122	0.00427709	Significant	-0.353964	-0.0569072	NPX ~ Mig * Age_c + NSS_17_c + ANO_c + Sex + Error(SampleID)		0.35
TIMP4	ENSG00000157150	Neurology	Q99727	OID21147	NSS_17_c	0.334906	1.07135e-05	0.00437876	Significant	0.0987976	0.0261242	NPX ~ Mig * Age_c + NSS_17_c + ANO_c + Sex + Error(SampleID)		0.13
IL31RA	ENSG00000164509	Inflammation_II	Q8NI17	OID30475	Age_c	0.267969	0.000118169	0.00444252	Significant	-0.624973	-0.0723467	NPX ~ Mig * Age_c + NSS_17_c + ANO_c + Sex + Error(SampleID)		0.64
CYTL1	ENSG00000170891	Cardiometabolic_II	Q9NRR1	OID30374	Age_c	0.267628	0.000119565	0.00444252	Significant	-0.336517	-0.0425862	NPX ~ Mig * Age_c + NSS_17_c + ANO_c + Sex + Error(SampleID)		0.22
PTPRC	ENSG00000081237	Cardiometabolic_II	P08575	OID30380	Age_c	0.267198	0.000121346	0.00445091	Significant	-0.260721	-0.0335	NPX ~ Mig * Age_c + NSS_17_c + ANO_c + Sex + Error(SampleID)		0.14
KLHL41	ENSG00000239474	Neurology_II	O60662	OID30986	Age_c	0.266035	0.000126297	0.00457388	Significant	-0.534956	0.0798848	NPX ~ Mig * Age_c + NSS_17_c + ANO_c + Sex + Error(SampleID)		0.78
TNFRSF13C	ENSG00000159958	Inflammation	Q96RJ3	OID20480	Age_c	0.270275	0.000128984	0.00461279	Significant	-0.327643	-0.0532276	NPX ~ Mig * Age_c + NSS_17_c + ANO_c + Sex + Error(SampleID)		0.35
LY9	ENSG00000122224	Inflammation	Q9HBG7	OID20670	Age_c	0.268104	0.000138803	0.00490265	Significant	-0.0673424	-0.0311935	NPX ~ Mig * Age_c + NSS_17_c + ANO_c + Sex + Error(SampleID)		0.11
FCER2	ENSG00000104921	Neurology	P06734	OID21133	Age_c	0.260141	0.000154537	0.00532687	Significant	-0.259975	-0.0466524	NPX ~ Mig * Age_c + NSS_17_c + ANO_c + Sex + Error(SampleID)		0.28
KIRREL2	ENSG00000126259	Neurology	Q6UWL6	OID20873	Age_c	0.280651	0.000153015	0.00532687	Significant	-0.281852	-0.0447184	NPX ~ Mig * Age_c + NSS_17_c + ANO_c + Sex + Error(SampleID)		0.23
NCAM1	ENSG00000149294	Cardiometabolic	P13591	OID20354	Age_c	0.259188	0.00015964	0.00543726	Significant	-0.396673	-0.0286074	NPX ~ Mig * Age_c + NSS_17_c + ANO_c + Sex + Error(SampleID)		0.10
SMOC1	ENSG00000198732	Oncology	Q9H4F8	OID21461	Mig	0.388654	1.96952e-06	0.0056348	Significant	-0.514166	-0.519738	NPX ~ Mig * Age_c + NSS_17_c + ANO_c + Sex + Error(SampleID)	47	0.12
ART3	ENSG00000156219	Cardiometabolic	Q13508	OID20346	Age_c	0.257582	0.000168617	0.00567544	Significant	-0.0837253	0.0362897	NPX ~ Mig * Age_c + NSS_17_c + ANO_c + Sex + Error(SampleID)		0.17
DPP6	ENSG00000130226	Oncology	P42658	OID21354	Age_c	0.271505	0.000173201	0.00576196	Significant	-0.00426455	-0.0540899	NPX ~ Mig * Age_c + NSS_17_c + ANO_c + Sex + Error(SampleID)		0.34
HMGCS1	ENSG00000112972	Cardiometabolic_II	Q01581	OID30157	Age_c	0.255571	0.000180543	0.00593716	Significant	-0.138983	0.0891259	NPX ~ Mig * Age_c + NSS_17_c + ANO_c + Sex + Error(SampleID)		1.03
ITGA2	ENSG00000164171	Inflammation_II	P17301	OID30570	Age_c	0.255134	0.000183241	0.00595743	Significant	-0.28436	-0.0407903	NPX ~ Mig * Age_c + NSS_17_c + ANO_c + Sex + Error(SampleID)		0.22
HEG1	ENSG00000173706	Inflammation_II	Q9ULI3	OID30579	Age_c	0.254502	0.000187215	0.00601824	Significant	-0.435572	-0.0351416	NPX ~ Mig * Age_c + NSS_17_c + ANO_c + Sex + Error(SampleID)		0.16
SEZ6	ENSG00000063015	Neurology_II	Q53EL9	OID30968	Age_c	0.256017	0.000208134	0.00661634	Significant	-0.513239	-0.0637959	NPX ~ Mig * Age_c + NSS_17_c + ANO_c + Sex + Error(SampleID)		0.50
CD86	ENSG00000114013	Oncology_II	P42081	OID31500	Age_c	0.249357	0.00022279	0.00700441	Significant	-0.190426	-0.0261733	NPX ~ Mig * Age_c + NSS_17_c + ANO_c + Sex + Error(SampleID)		0.09
CD14	ENSG00000170458	Cardiometabolic	P08571	OID20378	Age_c	0.248858	0.000226572	0.00704591	Significant	0.2071	-0.0430315	NPX ~ Mig * Age_c + NSS_17_c + ANO_c + Sex + Error(SampleID)		0.25
PBXIP1	ENSG00000163346	Oncology_II	Q96AQ6	OID31435	Age_c	0.247859	0.000234325	0.00720865	Significant	-0.290244	0.0461179	NPX ~ Mig * Age_c + NSS_17_c + ANO_c + Sex + Error(SampleID)		0.29
CCL19	ENSG00000172724	Neurology	Q99731	OID21030	Age_c	0.246933	0.000241745	0.00735779	Significant	-0.291503	-0.0494491	NPX ~ Mig * Age_c + NSS_17_c + ANO_c + Sex + Error(SampleID)		0.33
CDNF	ENSG00000185267	Oncology	Q49AH0	OID21318	Age_c	0.260429	0.000247681	0.00745911	Significant	-0.208847	0.0369234	NPX ~ Mig * Age_c + NSS_17_c + ANO_c + Sex + Error(SampleID)		0.17
CCL22	ENSG00000102962	Inflammation	O00626	OID20765	Age_c	0.242637	0.00027923	0.00832164	Significant	-0.384764	-0.0435807	NPX ~ Mig * Age_c + NSS_17_c + ANO_c + Sex + Error(SampleID)		0.26
COL9A1	ENSG00000112280	Inflammation	P20849	OID20550	Mig:Age_c	0.364516	8.91249e-06	0.00839218	Significant	-0.638132	-0.0858849	NPX ~ Mig * Age_c + NSS_17_c + ANO_c + Sex + Error(SampleID)		1.81
COL2A1	ENSG00000139219	Cardiometabolic_II	P02458	OID30286	Mig:Age_c	0.342926	7.92241e-06	0.00839218	Significant	-0.427995	-0.0519157	NPX ~ Mig * Age_c + NSS_17_c + ANO_c + Sex + Error(SampleID)		0.76
OMD	ENSG00000127083	Inflammation	Q99983	OID20725	Mig:Age_c	0.332473	1.17332e-05	0.00839218	Significant	-0.289287	-0.0227856	NPX ~ Mig * Age_c + NSS_17_c + ANO_c + Sex + Error(SampleID)		0.15
TNFRSF4	ENSG00000186827	Inflammation	P43489	OID20653	Age_c	0.244491	0.000304752	0.00898862	Significant	-0.305038	-0.0328197	NPX ~ Mig * Age_c + NSS_17_c + ANO_c + Sex + Error(SampleID)		0.14
CELA2A	ENSG00000142615	Cardiometabolic_II	P08217	OID30411	Age_c	0.239271	0.000312483	0.0091226	Significant	0.0581547	0.0721535	NPX ~ Mig * Age_c + NSS_17_c + ANO_c + Sex + Error(SampleID)		0.74
SNAP25	ENSG00000132639	Neurology_II	P60880	OID30811	Age_c	0.236237	0.000345712	0.00989083	Significant	-0.523767	-0.0646928	NPX ~ Mig * Age_c + NSS_17_c + ANO_c + Sex + Error(SampleID)		0.60
TPM3	ENSG00000143549	Cardiometabolic_II	P06753	OID30058	Age_c	0.236462	0.000343134	0.00989083	Significant	-0.111076	0.0567124	NPX ~ Mig * Age_c + NSS_17_c + ANO_c + Sex + Error(SampleID)		0.46
NCAM1	ENSG00000149294	Cardiometabolic	P13591	OID20354	Mig	0.345443	6.93427e-06	0.00991947	Significant	-0.396673	-0.448336	NPX ~ Mig * Age_c + NSS_17_c + ANO_c + Sex + Error(SampleID)	48	0.10
CNTNAP2	ENSG00000174469	Inflammation	Q9UHC6	OID20556	Age_c	0.254127	0.000354375	0.0100383	Significant	-0.457049	-0.0700572	NPX ~ Mig * Age_c + NSS_17_c + ANO_c + Sex + Error(SampleID)		0.50
CD34	ENSG00000174059	Neurology	P28906	OID21025	NSS_17_c	0.308434	2.83632e-05	0.0101434	Significant	-0.33621	-0.0197222	NPX ~ Mig * Age_c + NSS_17_c + ANO_c + Sex + Error(SampleID)		0.08
AGR3	ENSG00000173467	Oncology	Q8TD06	OID21243	Age_c	0.257384	0.000375257	0.0105256	Significant	-0.291408	-0.0984556	NPX ~ Mig * Age_c + NSS_17_c + ANO_c + Sex + Error(SampleID)		0.90
THY1	ENSG00000154096	Neurology	P04216	OID21050	Age_c	0.233203	0.000382369	0.010621	Significant	-0.145098	-0.0333508	NPX ~ Mig * Age_c + NSS_17_c + ANO_c + Sex + Error(SampleID)		0.16
PDCD1	ENSG00000188389	Oncology	Q15116	OID21396	Age_c	0.23621	0.000399671	0.0109558	Significant	-0.310499	-0.0456091	NPX ~ Mig * Age_c + NSS_17_c + ANO_c + Sex + Error(SampleID)		0.28
TIMP4	ENSG00000157150	Neurology	Q99727	OID21147	Age_c	0.231399	0.000405912	0.0109558	Significant	0.0987976	0.0291919	NPX ~ Mig * Age_c + NSS_17_c + ANO_c + Sex + Error(SampleID)		0.13
ERBB3	ENSG00000065361	Inflammation	P21860	OID20705	Age_c	0.231517	0.000404333	0.0109558	Significant	-0.216715	-0.0175893	NPX ~ Mig * Age_c + NSS_17_c + ANO_c + Sex + Error(SampleID)		0.05
GAS6	ENSG00000183087	Cardiometabolic	Q14393	OID20318	Age_c	0.230576	0.000417117	0.011153	Significant	-0.189478	-0.0288111	NPX ~ Mig * Age_c + NSS_17_c + ANO_c + Sex + Error(SampleID)		0.12
EPHA2	ENSG00000142627	Oncology	P29317	OID21342	Age_c	0.243355	0.000426276	0.0112924	Significant	-0.203675	-0.0453021	NPX ~ Mig * Age_c + NSS_17_c + ANO_c + Sex + Error(SampleID)		0.28
SEPTIN3	ENSG00000100167	Neurology_II	Q9UH03	OID31025	Age_c	0.228664	0.000444309	0.0116587	Significant	0.29344	0.0879614	NPX ~ Mig * Age_c + NSS_17_c + ANO_c + Sex + Error(SampleID)		1.16
CD7	ENSG00000173762	Inflammation_II	P09564	OID30543	Age_c	0.228396	0.000448256	0.0116587	Significant	-0.1568	-0.0379975	NPX ~ Mig * Age_c + NSS_17_c + ANO_c + Sex + Error(SampleID)		0.22
TCL1A	ENSG00000100721	Neurology	P56279	OID20987	Age_c	0.236189	0.000462018	0.0119084	Significant	-0.731014	-0.11351	NPX ~ Mig * Age_c + NSS_17_c + ANO_c + Sex + Error(SampleID)		1.78
HPCAL1	ENSG00000115756	Inflammation	P37235	OID20615	Age_c	0.23143	0.000466883	0.0119264	Significant	-0.153003	-0.0498351	NPX ~ Mig * Age_c + NSS_17_c + ANO_c + Sex + Error(SampleID)		0.35
PTGDS	ENSG00000107317	Cardiometabolic	P41222	OID20408	Age_c	0.226884	0.000471176	0.0119295	Significant	-0.285507	-0.0285119	NPX ~ Mig * Age_c + NSS_17_c + ANO_c + Sex + Error(SampleID)		0.12
MMP12	ENSG00000262406	Oncology	P39900	OID21439	Age_c	0.230642	0.000478967	0.0120204	Significant	-0.558209	-0.0665447	NPX ~ Mig * Age_c + NSS_17_c + ANO_c + Sex + Error(SampleID)		0.62
TMOD4	ENSG00000163157	Oncology_II	Q9NZQ9	OID31246	Age_c	0.226007	0.000484984	0.0120655	Significant	0.210323	0.0901602	NPX ~ Mig * Age_c + NSS_17_c + ANO_c + Sex + Error(SampleID)		1.24
FSHB	ENSG00000131808	Cardiometabolic_II	P01225	OID30233	Mig:Age_c	0.316582	2.10945e-05	0.0120703	Significant	-0.623262	-0.0329163	NPX ~ Mig * Age_c + NSS_17_c + ANO_c + Sex + Error(SampleID)		0.35
EFNB2	ENSG00000125266	Neurology_II	P52799	OID30954	NSS_17_c	0.305666	3.79791e-05	0.0120731	Significant	-0.09769	-0.0386492	NPX ~ Mig * Age_c + NSS_17_c + ANO_c + Sex + Error(SampleID)		0.32
ITGB6	ENSG00000115221	Inflammation	P18564	OID20493	Age_c	0.229717	0.000493541	0.0121303	Significant	-0.608043	0.0363846	NPX ~ Mig * Age_c + NSS_17_c + ANO_c + Sex + Error(SampleID)		0.20
SDK2	ENSG00000069188	Inflammation_II	Q58EX2	OID30662	Age_c	0.22532	0.000496067	0.0121303	Significant	-0.188285	-0.0309743	NPX ~ Mig * Age_c + NSS_17_c + ANO_c + Sex + Error(SampleID)		0.15
PTPRC	ENSG00000081237	Cardiometabolic_II	P08575	OID30380	Mig:Age_c	0.30983	2.69665e-05	0.0128585	Significant	-0.260721	-0.0204028	NPX ~ Mig * Age_c + NSS_17_c + ANO_c + Sex + Error(SampleID)		0.14
CLEC4A	ENSG00000111729	Inflammation	Q9UMR7	OID20573	NSS_17_c	0.317899	4.49674e-05	0.0128652	Significant	-0.126421	-0.0293632	NPX ~ Mig * Age_c + NSS_17_c + ANO_c + Sex + Error(SampleID)		0.17
TNFRSF10C	ENSG00000173535	Cardiometabolic	O14798	OID20265	Mig	0.316766	2.05608e-05	0.0131952	Significant	-0.642627	-0.648883	NPX ~ Mig * Age_c + NSS_17_c + ANO_c + Sex + Error(SampleID)	48	0.25
ROR1	ENSG00000185483	Cardiometabolic	Q01973	OID20224	Mig	0.329006	2.17435e-05	0.0131952	Significant	-0.467712	-0.47515	NPX ~ Mig * Age_c + NSS_17_c + ANO_c + Sex + Error(SampleID)	45	0.13
F3	ENSG00000117525	Oncology	P13726	OID21440	Mig	0.320247	2.30605e-05	0.0131952	Significant	-0.38109	-0.364958	NPX ~ Mig * Age_c + NSS_17_c + ANO_c + Sex + Error(SampleID)	47	0.08
GFAP	ENSG00000131095	Oncology	P14136	OID21247	Age_c	0.24491	0.000548496	0.013267	Significant	-0.508337	-0.0771459	NPX ~ Mig * Age_c + NSS_17_c + ANO_c + Sex + Error(SampleID)		0.59
ADH4	ENSG00000198099	Cardiometabolic	P08319	OID20117	Age_c	0.239824	0.000551824	0.013267	Significant	0.0103249	0.0711946	NPX ~ Mig * Age_c + NSS_17_c + ANO_c + Sex + Error(SampleID)		0.56
IL18R1	ENSG00000115604	Inflammation	Q13478	OID20652	Age_c	0.225027	0.000574289	0.013692	Significant	-0.202781	-0.0364096	NPX ~ Mig * Age_c + NSS_17_c + ANO_c + Sex + Error(SampleID)		0.19
SMPDL3B	ENSG00000130768	Oncology_II	Q92485	OID31387	Age_c	0.219131	0.000607714	0.0143692	Significant	-0.211404	0.0926533	NPX ~ Mig * Age_c + NSS_17_c + ANO_c + Sex + Error(SampleID)		1.36
CCL4	ENSG00000275302	Inflammation	P13236	OID20695	Age_c	0.218417	0.000622058	0.0145878	Significant	-0.402624	-0.0429208	NPX ~ Mig * Age_c + NSS_17_c + ANO_c + Sex + Error(SampleID)		0.29
B4GAT1	ENSG00000174684	Neurology	O43505	OID21127	Age_c	0.216011	0.000672881	0.0156513	Significant	-0.332517	-0.0236628	NPX ~ Mig * Age_c + NSS_17_c + ANO_c + Sex + Error(SampleID)		0.09
GP2	ENSG00000169347	Cardiometabolic	P55259	OID20090	Age_c	0.232912	0.000681917	0.0157336	Significant	-0.115599	0.0661967	NPX ~ Mig * Age_c + NSS_17_c + ANO_c + Sex + Error(SampleID)		0.51
SCN3B	ENSG00000166257	Neurology_II	Q9NY72	OID30804	Age_c	0.214635	0.000703719	0.0161067	Significant	-0.188164	0.0950048	NPX ~ Mig * Age_c + NSS_17_c + ANO_c + Sex + Error(SampleID)		1.47
DUSP13		Oncology_II	Q6B8I1	OID31394	Age_c	0.213476	0.000730761	0.0165929	Significant	-0.431871	0.077968	NPX ~ Mig * Age_c + NSS_17_c + ANO_c + Sex + Error(SampleID)		1.00
ISLR2	ENSG00000167178	Neurology	Q6UXK2	OID20889	Age_c	0.22983	0.000749082	0.016875	Significant	-0.403323	-0.0424852	NPX ~ Mig * Age_c + NSS_17_c + ANO_c + Sex + Error(SampleID)		0.27
MAP1LC3B2	ENSG00000258102	Cardiometabolic_II	A6NCE7	OID30074	Age_c	0.212104	0.000764085	0.0170785	Significant	-0.230976	0.0793942	NPX ~ Mig * Age_c + NSS_17_c + ANO_c + Sex + Error(SampleID)		1.04
GNPDA2	ENSG00000163281	Inflammation_II	Q8TDQ7	OID30597	Age_c	0.211798	0.000771722	0.0171155	Significant	-0.279742	-0.0354077	NPX ~ Mig * Age_c + NSS_17_c + ANO_c + Sex + Error(SampleID)		0.21
HS6ST2	ENSG00000171004	Inflammation_II	Q96MM7	OID30481	Mig	0.281928	7.18559e-05	0.01805	Significant	-0.560904	-0.583734	NPX ~ Mig * Age_c + NSS_17_c + ANO_c + Sex + Error(SampleID)	48	0.24
MEGF11	ENSG00000157890	Cardiometabolic_II	A6BM72	OID30099	Mig	0.277322	8.07962e-05	0.01805	Significant	-0.471307	-0.567783	NPX ~ Mig * Age_c + NSS_17_c + ANO_c + Sex + Error(SampleID)	48	0.23
KITLG	ENSG00000049130	Cardiometabolic	P21583	OID20196	Mig	0.297016	7.48397e-05	0.01805	Significant	-0.59669	-0.521486	NPX ~ Mig * Age_c + NSS_17_c + ANO_c + Sex + Error(SampleID)	45	0.18
PCDH9	ENSG00000184226	Oncology_II	Q9HC56	OID31516	Mig	0.286191	5.82303e-05	0.01805	Significant	-0.474357	-0.496321	NPX ~ Mig * Age_c + NSS_17_c + ANO_c + Sex + Error(SampleID)	48	0.17
HEG1	ENSG00000173706	Inflammation_II	Q9ULI3	OID30579	Mig	0.277291	8.20166e-05	0.01805	Significant	-0.435572	-0.475792	NPX ~ Mig * Age_c + NSS_17_c + ANO_c + Sex + Error(SampleID)	48	0.16
ECE1	ENSG00000117298	Neurology	P42892	OID20891	Mig	0.319597	4.15216e-05	0.01805	Significant	-0.403105	-0.423339	NPX ~ Mig * Age_c + NSS_17_c + ANO_c + Sex + Error(SampleID)	44	0.11
ASPN	ENSG00000106819	Cardiometabolic_II	Q9BXN1	OID30315	Mig	0.293255	5.32371e-05	0.01805	Significant	-0.382131	-0.378155	NPX ~ Mig * Age_c + NSS_17_c + ANO_c + Sex + Error(SampleID)	47	0.09
B4GAT1	ENSG00000174684	Neurology	O43505	OID21127	Mig	0.293816	4.72942e-05	0.01805	Significant	-0.332517	-0.37054	NPX ~ Mig * Age_c + NSS_17_c + ANO_c + Sex + Error(SampleID)	48	0.09
NOTCH1	ENSG00000148400	Cardiometabolic	P46531	OID20311	Age_c	0.209536	0.000830488	0.0182771	Significant	-0.182988	-0.0149001	NPX ~ Mig * Age_c + NSS_17_c + ANO_c + Sex + Error(SampleID)		0.04
CEND1	ENSG00000184524	Neurology_II	Q8N111	OID30821	Age_c	0.208558	0.000857215	0.0185048	Significant	-0.577608	-0.0670394	NPX ~ Mig * Age_c + NSS_17_c + ANO_c + Sex + Error(SampleID)		0.76
LRRC25	ENSG00000175489	Oncology	Q8N386	OID21333	Age_c	0.220818	0.000860237	0.0185048	Significant	-0.385826	-0.0383282	NPX ~ Mig * Age_c + NSS_17_c + ANO_c + Sex + Error(SampleID)		0.23
ACE	ENSG00000159640	Inflammation_II	P12821	OID30696	Age_c	0.208577	0.000856683	0.0185048	Significant	-0.00814126	-0.0242308	NPX ~ Mig * Age_c + NSS_17_c + ANO_c + Sex + Error(SampleID)		0.10
POF1B	ENSG00000124429	Inflammation_II	Q8WVV4	OID30504	NSS_17_c	0.282483	7.13968e-05	0.0185697	Significant	-0.292329	-0.0439175	NPX ~ Mig * Age_c + NSS_17_c + ANO_c + Sex + Error(SampleID)		0.46
NEO1	ENSG00000067141	Neurology_II	Q92859	OID31066	Mig	0.273887	9.26382e-05	0.0189313	Significant	-0.198384	-0.201445	NPX ~ Mig * Age_c + NSS_17_c + ANO_c + Sex + Error(SampleID)	48	0.03
THBS4	ENSG00000113296	Cardiometabolic	P35443	OID20368	Age_c	0.207468	0.000887996	0.0189594	Significant	-0.527265	-0.0561327	NPX ~ Mig * Age_c + NSS_17_c + ANO_c + Sex + Error(SampleID)		0.54
ACTN2	ENSG00000077522	Cardiometabolic_II	P35609	OID30192	Age_c	0.20692	0.00090387	0.0191553	Significant	-0.161157	0.0555377	NPX ~ Mig * Age_c + NSS_17_c + ANO_c + Sex + Error(SampleID)		0.53
PCNA	ENSG00000132646	Oncology_II	P12004	OID31161	Age_c	0.206063	0.000929254	0.0195485	Significant	-0.569388	0.0933184	NPX ~ Mig * Age_c + NSS_17_c + ANO_c + Sex + Error(SampleID)		1.50
FSHB	ENSG00000131808	Cardiometabolic_II	P01225	OID30233	Sex	0.286322	6.23976e-05	0.0198355	Significant	-0.623262	-0.366463	NPX ~ Mig * Age_c + NSS_17_c + ANO_c + Sex + Error(SampleID)		0.35
VGF	ENSG00000128564	Neurology_II	O15240	OID31067	NSS_17_c	0.276312	8.85474e-05	0.0211112	Significant	-0.56232	-0.0475685	NPX ~ Mig * Age_c + NSS_17_c + ANO_c + Sex + Error(SampleID)		0.55
PALM	ENSG00000099864	Oncology_II	O75781	OID31515	Mig	0.267975	0.000111583	0.0212826	Significant	-0.485382	-0.496765	NPX ~ Mig * Age_c + NSS_17_c + ANO_c + Sex + Error(SampleID)	48	0.18
DPP10	ENSG00000175497	Inflammation	Q8N608	OID20527	Age_c	0.219541	0.00102283	0.0213601	Significant	-0.208171	-0.0539518	NPX ~ Mig * Age_c + NSS_17_c + ANO_c + Sex + Error(SampleID)		0.36
THBS2	ENSG00000186340	Neurology	P35442	OID21104	Age_c	0.201899	0.00106276	0.0218746	Significant	-0.153174	-0.0468835	NPX ~ Mig * Age_c + NSS_17_c + ANO_c + Sex + Error(SampleID)		0.39
EZR	ENSG00000092820	Neurology	P15311	OID21017	Age_c	0.202047	0.00105772	0.0218746	Significant	-0.162302	-0.0381732	NPX ~ Mig * Age_c + NSS_17_c + ANO_c + Sex + Error(SampleID)		0.26
TSPAN15	ENSG00000099282	Cardiometabolic_II	O95858	OID30095	Age_c	0.200379	0.00111601	0.0224852	Significant	0.143511	0.0834894	NPX ~ Mig * Age_c + NSS_17_c + ANO_c + Sex + Error(SampleID)		1.24
CTSD	ENSG00000117984	Cardiometabolic	P07339	OID20358	Age_c	0.200528	0.00111068	0.0224852	Significant	-0.0483659	-0.0352266	NPX ~ Mig * Age_c + NSS_17_c + ANO_c + Sex + Error(SampleID)		0.22
ITGB2	ENSG00000160255	Cardiometabolic	P05107	OID20315	Age_c	0.200634	0.00110688	0.0224852	Significant	-0.130319	-0.0270077	NPX ~ Mig * Age_c + NSS_17_c + ANO_c + Sex + Error(SampleID)		0.13
ESM1	ENSG00000164283	Inflammation	Q9NQ30	OID20758	Age_c	0.20003	0.00112859	0.0225798	Significant	-0.175326	-0.0265807	NPX ~ Mig * Age_c + NSS_17_c + ANO_c + Sex + Error(SampleID)		0.13
MMUT	ENSG00000146085	Cardiometabolic_II	P22033	OID30159	Age_c	0.199752	0.00113871	0.0226239	Significant	-0.215782	0.105143	NPX ~ Mig * Age_c + NSS_17_c + ANO_c + Sex + Error(SampleID)		1.97
CD28	ENSG00000178562	Oncology	P10747	OID21265	Mig:Age_c	0.301085	9.513e-05	0.0227164	Significant	-0.554521	-0.035323	NPX ~ Mig * Age_c + NSS_17_c + ANO_c + Sex + Error(SampleID)		0.38
ACAN	ENSG00000157766	Cardiometabolic	P16112	OID20159	Mig:Age_c	0.287015	0.000104156	0.0227164	Significant	-0.21418	-0.0277189	NPX ~ Mig * Age_c + NSS_17_c + ANO_c + Sex + Error(SampleID)		0.29
CD83	ENSG00000112149	Inflammation	Q01151	OID20565	Mig:Age_c	0.296812	9.0565e-05	0.0227164	Significant	-0.407144	-0.0240039	NPX ~ Mig * Age_c + NSS_17_c + ANO_c + Sex + Error(SampleID)		0.19
PCDH9	ENSG00000184226	Oncology_II	Q9HC56	OID31516	Mig:Age_c	0.281361	7.42542e-05	0.0227164	Significant	-0.474357	-0.0210358	NPX ~ Mig * Age_c + NSS_17_c + ANO_c + Sex + Error(SampleID)		0.17
PLIN1	ENSG00000166819	Neurology	O60240	OID20835	Mig:Age_c	0.290535	0.00011116	0.0227164	Significant	-0.167016	-0.0205494	NPX ~ Mig * Age_c + NSS_17_c + ANO_c + Sex + Error(SampleID)		0.16
PPP3R1	ENSG00000221823	Neurology	P63098	OID20902	Mig:Age_c	0.298706	5.84906e-05	0.0227164	Significant	-0.0662117	-0.0183534	NPX ~ Mig * Age_c + NSS_17_c + ANO_c + Sex + Error(SampleID)		0.12
APOD	ENSG00000189058	Inflammation_II	P05090	OID30746	Mig:Age_c	0.281751	8.72595e-05	0.0227164	Significant	0.0849792	0.018232	NPX ~ Mig * Age_c + NSS_17_c + ANO_c + Sex + Error(SampleID)		0.11
NGRN	ENSG00000182768	Neurology_II	Q9NPE2	OID31115	Mig:Age_c	0.271145	0.000105909	0.0227164	Significant	-0.0332652	-0.0103447	NPX ~ Mig * Age_c + NSS_17_c + ANO_c + Sex + Error(SampleID)		0.04
WNT9A	ENSG00000143816	Inflammation	O14904	OID20460	Age_c	0.203105	0.00115578	0.0228046	Significant	-0.278759	0.0517855	NPX ~ Mig * Age_c + NSS_17_c + ANO_c + Sex + Error(SampleID)		0.48
FASLG	ENSG00000117560	Inflammation	P48023	OID20665	Age_c	0.202811	0.00116656	0.0228598	Significant	-0.533205	-0.0372418	NPX ~ Mig * Age_c + NSS_17_c + ANO_c + Sex + Error(SampleID)		0.23
DPP4	ENSG00000197635	Cardiometabolic	P27487	OID20406	Age_c	0.19826	0.00119458	0.0232496	Significant	-0.30572	-0.0268157	NPX ~ Mig * Age_c + NSS_17_c + ANO_c + Sex + Error(SampleID)		0.13
NMRK2	ENSG00000077009	Oncology_II	Q9NPI5	OID31163	Age_c	0.197819	0.00121158	0.023264	Significant	-0.1556	0.111595	NPX ~ Mig * Age_c + NSS_17_c + ANO_c + Sex + Error(SampleID)		2.25
CD109	ENSG00000156535	Neurology	Q6YHK3	OID21108	Age_c	0.197988	0.00120505	0.023264	Significant	-0.330561	-0.0449909	NPX ~ Mig * Age_c + NSS_17_c + ANO_c + Sex + Error(SampleID)		0.37
ROBO2	ENSG00000185008	Neurology	Q9HCK4	OID21007	Mig	0.263645	0.000130792	0.0233873	Significant	-0.267749	-0.309627	NPX ~ Mig * Age_c + NSS_17_c + ANO_c + Sex + Error(SampleID)	48	0.07
CDH5	ENSG00000179776	Cardiometabolic	P33151	OID20243	NSS_17_c	0.270955	0.000106608	0.0234619	Significant	-0.0733407	-0.0170015	NPX ~ Mig * Age_c + NSS_17_c + ANO_c + Sex + Error(SampleID)		0.07
FABP4	ENSG00000170323	Cardiometabolic	P15090	OID20245	Mig:Age_c	0.266731	0.000123312	0.0235197	Significant	-0.252867	-0.0254705	NPX ~ Mig * Age_c + NSS_17_c + ANO_c + Sex + Error(SampleID)		0.26
ICAM1	ENSG00000090339	Cardiometabolic	P05362	OID20411	Age_c	0.196655	0.00125762	0.023987	Significant	-0.169209	-0.0275138	NPX ~ Mig * Age_c + NSS_17_c + ANO_c + Sex + Error(SampleID)		0.14
FASLG	ENSG00000117560	Inflammation	P48023	OID20665	Mig	0.270446	0.000142687	0.0240133	Significant	-0.533205	-0.550975	NPX ~ Mig * Age_c + NSS_17_c + ANO_c + Sex + Error(SampleID)	47	0.23
PAEP	ENSG00000122133	Neurology	P09466	OID20925	Mig	0.266777	0.000173686	0.024079	Significant	1.34028	1.45157	NPX ~ Mig * Age_c + NSS_17_c + ANO_c + Sex + Error(SampleID)	46	1.60
LRTM2	ENSG00000166159	Neurology_II	Q8N967	OID31020	Mig	0.25495	0.000173855	0.024079	Significant	-0.594643	-0.665738	NPX ~ Mig * Age_c + NSS_17_c + ANO_c + Sex + Error(SampleID)	48	0.35
LDLR	ENSG00000130164	Cardiometabolic	P01130	OID20240	Mig	0.25824	0.000159983	0.024079	Significant	-0.511028	-0.540161	NPX ~ Mig * Age_c + NSS_17_c + ANO_c + Sex + Error(SampleID)	48	0.23
ITGB6	ENSG00000115221	Inflammation	P18564	OID20493	Mig	0.260446	0.000185158	0.024079	Significant	-0.608043	-0.505941	NPX ~ Mig * Age_c + NSS_17_c + ANO_c + Sex + Error(SampleID)	47	0.20
ERBB3	ENSG00000065361	Inflammation	P21860	OID20705	Mig	0.254877	0.000177271	0.024079	Significant	-0.216715	-0.239411	NPX ~ Mig * Age_c + NSS_17_c + ANO_c + Sex + Error(SampleID)	48	0.05
EPHB6	ENSG00000106123	Neurology	O15197	OID20982	NSS_17_c	0.277309	0.00012065	0.0246557	Significant	-0.407263	-0.0258637	NPX ~ Mig * Age_c + NSS_17_c + ANO_c + Sex + Error(SampleID)		0.16
ADAM8	ENSG00000151651	Neurology	P78325	OID21039	Age_c	0.195298	0.00131348	0.0248865	Significant	-0.318676	-0.030138	NPX ~ Mig * Age_c + NSS_17_c + ANO_c + Sex + Error(SampleID)		0.17
IFNGR2	ENSG00000159128	Neurology	P38484	OID20941	Mig	0.254886	0.000254778	0.0253537	Significant	-0.752244	-0.745894	NPX ~ Mig * Age_c + NSS_17_c + ANO_c + Sex + Error(SampleID)	46	0.45
SOST	ENSG00000167941	Cardiometabolic	Q9BQB4	OID20204	Mig	0.256204	0.000292441	0.0253537	Significant	-0.536187	-0.548926	NPX ~ Mig * Age_c + NSS_17_c + ANO_c + Sex + Error(SampleID)	45	0.25
CD22	ENSG00000012124	Inflammation	P20273	OID20637	Mig	0.255346	0.000254788	0.0253537	Significant	-0.412036	-0.493324	NPX ~ Mig * Age_c + NSS_17_c + ANO_c + Sex + Error(SampleID)	47	0.20
COMP	ENSG00000105664	Cardiometabolic	P49747	OID20405	Mig	0.249577	0.000214123	0.0253537	Significant	-0.532083	-0.482827	NPX ~ Mig * Age_c + NSS_17_c + ANO_c + Sex + Error(SampleID)	48	0.19
BCAN	ENSG00000132692	Neurology	Q96GW7	OID20998	Mig	0.257469	0.000235527	0.0253537	Significant	-0.428318	-0.437303	NPX ~ Mig * Age_c + NSS_17_c + ANO_c + Sex + Error(SampleID)	46	0.15
NTRK2	ENSG00000148053	Cardiometabolic	Q16620	OID20136	Mig	0.251454	0.000280969	0.0253537	Significant	-0.349302	-0.362309	NPX ~ Mig * Age_c + NSS_17_c + ANO_c + Sex + Error(SampleID)	45	0.11
PKD1	ENSG00000008710	Cardiometabolic_II	P98161	OID30328	Mig	0.24322	0.000274329	0.0253537	Significant	-0.360607	-0.353241	NPX ~ Mig * Age_c + NSS_17_c + ANO_c + Sex + Error(SampleID)	47	0.10
LAMB1	ENSG00000091136	Cardiometabolic_II	P07942	OID30280	Mig	0.241288	0.000291479	0.0253537	Significant	-0.323998	-0.331291	NPX ~ Mig * Age_c + NSS_17_c + ANO_c + Sex + Error(SampleID)	48	0.09
CD34	ENSG00000174059	Neurology	P28906	OID21025	Mig	0.243908	0.000259714	0.0253537	Significant	-0.33621	-0.309374	NPX ~ Mig * Age_c + NSS_17_c + ANO_c + Sex + Error(SampleID)	48	0.08
ERBB2	ENSG00000141736	Oncology	P04626	OID21520	Mig	0.242178	0.000278688	0.0253537	Significant	-0.284751	-0.295774	NPX ~ Mig * Age_c + NSS_17_c + ANO_c + Sex + Error(SampleID)	48	0.08
RGMB	ENSG00000174136	Neurology	Q6NW40	OID21045	Mig	0.24853	0.000226682	0.0253537	Significant	-0.277302	-0.267552	NPX ~ Mig * Age_c + NSS_17_c + ANO_c + Sex + Error(SampleID)	48	0.06
CCN4	ENSG00000104415	Oncology	O95388	OID21444	Age_c	0.198011	0.00135699	0.0253749	Significant	-0.357049	-0.0391988	NPX ~ Mig * Age_c + NSS_17_c + ANO_c + Sex + Error(SampleID)		0.26
ENPP6	ENSG00000164303	Cardiometabolic_II	Q6UWR7	OID30273	Age_c	0.194325	0.00135501	0.0253749	Significant	-0.117018	-0.0303438	NPX ~ Mig * Age_c + NSS_17_c + ANO_c + Sex + Error(SampleID)		0.17
PDE4D	ENSG00000113448	Cardiometabolic_II	Q08499	OID30084	Age_c	0.19306	0.00141087	0.0262109	Significant	-0.654733	0.0989534	NPX ~ Mig * Age_c + NSS_17_c + ANO_c + Sex + Error(SampleID)		1.82
ITGAL	ENSG00000005844	Inflammation_II	P20701	OID30537	Age_c	0.19178	0.00146971	0.0265197	Significant	0.384692	-0.107503	NPX ~ Mig * Age_c + NSS_17_c + ANO_c + Sex + Error(SampleID)		2.17
SLC12A2	ENSG00000064651	Cardiometabolic_II	P55011	OID30077	Age_c	0.192181	0.00145106	0.0265197	Significant	-0.20936	0.05568	NPX ~ Mig * Age_c + NSS_17_c + ANO_c + Sex + Error(SampleID)		0.58
COL6A3	ENSG00000163359	Cardiometabolic	P12111	OID20292	Age_c	0.191692	0.00147383	0.0265197	Significant	-0.363386	-0.0362044	NPX ~ Mig * Age_c + NSS_17_c + ANO_c + Sex + Error(SampleID)		0.25
CKAP4	ENSG00000136026	Inflammation	Q07065	OID20617	Age_c	0.19575	0.00145691	0.0265197	Significant	-0.283326	-0.0305383	NPX ~ Mig * Age_c + NSS_17_c + ANO_c + Sex + Error(SampleID)		0.16
TNFSF13B	ENSG00000102524	Cardiometabolic	Q9Y275	OID20272	Age_c	0.192096	0.00145496	0.0265197	Significant	-0.00337487	-0.0284311	NPX ~ Mig * Age_c + NSS_17_c + ANO_c + Sex + Error(SampleID)		0.15
CD86	ENSG00000114013	Oncology_II	P42081	OID31500	Mig:Age_c	0.260588	0.000152195	0.0272144	Significant	-0.190426	-0.0147973	NPX ~ Mig * Age_c + NSS_17_c + ANO_c + Sex + Error(SampleID)		0.09
STXBP3	ENSG00000116266	Oncology	O00186	OID21240	Mig:Age_c	0.282481	0.000172088	0.0274924	Significant	0.00497697	-0.0378383	NPX ~ Mig * Age_c + NSS_17_c + ANO_c + Sex + Error(SampleID)		0.48
CD6	ENSG00000013725	Inflammation	P30203	OID20649	Mig:Age_c	0.254211	0.000221015	0.0274924	Significant	-0.0711721	-0.0277976	NPX ~ Mig * Age_c + NSS_17_c + ANO_c + Sex + Error(SampleID)		0.34
CD22	ENSG00000012124	Inflammation	P20273	OID20637	Mig:Age_c	0.25701	0.000201357	0.0274924	Significant	-0.412036	-0.0215651	NPX ~ Mig * Age_c + NSS_17_c + ANO_c + Sex + Error(SampleID)		0.20
BAMBI	ENSG00000095739	Oncology	Q13145	OID21267	Mig:Age_c	0.281824	0.000175684	0.0274924	Significant	-0.0956472	-0.0177623	NPX ~ Mig * Age_c + NSS_17_c + ANO_c + Sex + Error(SampleID)		0.11
AXL	ENSG00000167601	Cardiometabolic	P30530	OID20363	Mig:Age_c	0.251678	0.000206	0.0274924	Significant	-0.128118	-0.0172742	NPX ~ Mig * Age_c + NSS_17_c + ANO_c + Sex + Error(SampleID)		0.13
LY9	ENSG00000122224	Inflammation	Q9HBG7	OID20670	Mig:Age_c	0.254339	0.000220077	0.0274924	Significant	-0.0673424	-0.0159552	NPX ~ Mig * Age_c + NSS_17_c + ANO_c + Sex + Error(SampleID)		0.11
BSG	ENSG00000172270	Inflammation	P35613	OID20626	Mig:Age_c	0.257316	0.000199317	0.0274924	Significant	-0.145786	-0.0137258	NPX ~ Mig * Age_c + NSS_17_c + ANO_c + Sex + Error(SampleID)		0.08
FABP9	ENSG00000205186	Inflammation	Q0Z7S8	OID20501	Mig	0.255532	0.000403232	0.0290674	Significant	0.97178	0.959892	NPX ~ Mig * Age_c + NSS_17_c + ANO_c + Sex + Error(SampleID)	44	0.76
PRND	ENSG00000171864	Neurology_II	Q9UKY0	OID31124	Mig	0.233117	0.000368051	0.0290674	Significant	-0.828989	-0.890283	NPX ~ Mig * Age_c + NSS_17_c + ANO_c + Sex + Error(SampleID)	48	0.71
NPDC1	ENSG00000107281	Cardiometabolic	Q9NQX5	OID20205	Mig	0.242947	0.000401099	0.0290674	Significant	-0.557429	-0.563941	NPX ~ Mig * Age_c + NSS_17_c + ANO_c + Sex + Error(SampleID)	45	0.27
CSF2RB	ENSG00000100368	Inflammation_II	P32927	OID30553	Mig	0.231029	0.000414642	0.0290674	Significant	-0.495523	-0.533291	NPX ~ Mig * Age_c + NSS_17_c + ANO_c + Sex + Error(SampleID)	48	0.26
NOS1	ENSG00000089250	Neurology	P29475	OID20863	Mig	0.247062	0.000403033	0.0290674	Significant	-0.481312	-0.519248	NPX ~ Mig * Age_c + NSS_17_c + ANO_c + Sex + Error(SampleID)	44	0.22
FCRL1	ENSG00000163534	Cardiometabolic	Q96LA6	OID20172	Mig	0.23974	0.000376463	0.0290674	Significant	-0.370481	-0.465484	NPX ~ Mig * Age_c + NSS_17_c + ANO_c + Sex + Error(SampleID)	45	0.18
MOG	ENSG00000204655	Oncology	Q16653	OID21384	Mig	0.243537	0.000349184	0.0290674	Significant	-0.442288	-0.424729	NPX ~ Mig * Age_c + NSS_17_c + ANO_c + Sex + Error(SampleID)	47	0.16
NOTCH1	ENSG00000148400	Cardiometabolic	P46531	OID20311	Mig	0.229649	0.000416555	0.0290674	Significant	-0.182988	-0.201737	NPX ~ Mig * Age_c + NSS_17_c + ANO_c + Sex + Error(SampleID)	48	0.04
PCOLCE	ENSG00000106333	Cardiometabolic	Q15113	OID20384	Age_c	0.187633	0.00167722	0.0299024	Significant	-0.216399	0.0252339	NPX ~ Mig * Age_c + NSS_17_c + ANO_c + Sex + Error(SampleID)		0.12
CNTN4	ENSG00000144619	Neurology	Q8IWV2	OID21117	Age_c	0.187495	0.00168459	0.0299024	Significant	-0.277107	-0.0242494	NPX ~ Mig * Age_c + NSS_17_c + ANO_c + Sex + Error(SampleID)		0.11
NXPH1	ENSG00000122584	Neurology	P58417	OID20849	Age_c	0.202681	0.00169318	0.0299024	Significant	-0.143742	-0.0229178	NPX ~ Mig * Age_c + NSS_17_c + ANO_c + Sex + Error(SampleID)		0.09
BAMBI	ENSG00000095739	Oncology	Q13145	OID21267	Age_c	0.206197	0.00172908	0.0303491	Significant	-0.0956472	-0.0291633	NPX ~ Mig * Age_c + NSS_17_c + ANO_c + Sex + Error(SampleID)		0.11
REXO2	ENSG00000076043	Cardiometabolic_II	Q9Y3B8	OID30075	Age_c	0.18643	0.00174256	0.0303992	Significant	-0.130568	0.111089	NPX ~ Mig * Age_c + NSS_17_c + ANO_c + Sex + Error(SampleID)		2.40
TP53I3	ENSG00000115129	Inflammation_II	Q53FA7	OID30632	Age_c	0.185844	0.00177531	0.0307828	Significant	-0.420556	-0.0631715	NPX ~ Mig * Age_c + NSS_17_c + ANO_c + Sex + Error(SampleID)		0.78
TXNRD1	ENSG00000198431	Neurology	Q16881	OID21135	Age_c	0.185094	0.0018181	0.0313348	Significant	-0.283439	-0.0432312	NPX ~ Mig * Age_c + NSS_17_c + ANO_c + Sex + Error(SampleID)		0.37
UNC5D	ENSG00000156687	Inflammation_II	Q6UXZ4	OID30447	Mig:Age_c	0.242827	0.000277464	0.031815	Significant	-0.293245	-0.0284715	NPX ~ Mig * Age_c + NSS_17_c + ANO_c + Sex + Error(SampleID)		0.37
PDCD1	ENSG00000188389	Oncology	Q15116	OID21396	Mig:Age_c	0.246091	0.000289126	0.031815	Significant	-0.310499	-0.0248374	NPX ~ Mig * Age_c + NSS_17_c + ANO_c + Sex + Error(SampleID)		0.28
CD5	ENSG00000110448	Oncology	P06127	OID21449	Mig:Age_c	0.246377	0.000286413	0.031815	Significant	-0.310916	-0.017795	NPX ~ Mig * Age_c + NSS_17_c + ANO_c + Sex + Error(SampleID)		0.14
AOC3	ENSG00000131471	Cardiometabolic	Q16853	OID20389	NSS_17_c	0.257861	0.000167024	0.031857	Significant	-0.292772	-0.0204761	NPX ~ Mig * Age_c + NSS_17_c + ANO_c + Sex + Error(SampleID)		0.11
BAMBI	ENSG00000095739	Oncology	Q13145	OID21267	NSS_17_c	0.281122	0.00017961	0.0321165	Significant	-0.0956472	-0.0215263	NPX ~ Mig * Age_c + NSS_17_c + ANO_c + Sex + Error(SampleID)		0.11
SYT1	ENSG00000067715	Neurology_II	P21579	OID31089	Mig:Age_c	0.238467	0.000320974	0.0327966	Significant	-0.299092	-0.0301003	NPX ~ Mig * Age_c + NSS_17_c + ANO_c + Sex + Error(SampleID)		0.43
ITGB2	ENSG00000160255	Cardiometabolic	P05107	OID20315	Mig:Age_c	0.239072	0.00031456	0.0327966	Significant	-0.130319	-0.0165858	NPX ~ Mig * Age_c + NSS_17_c + ANO_c + Sex + Error(SampleID)		0.13
S100A13	ENSG00000189171	Inflammation_II	Q99584	OID30529	Mig	0.225087	0.000483152	0.0329119	Significant	-0.50517	-0.505329	NPX ~ Mig * Age_c + NSS_17_c + ANO_c + Sex + Error(SampleID)	48	0.24
TNXB	ENSG00000168477	Neurology	P22105	OID21107	NSS_17_c	0.253003	0.000196968	0.0331486	Significant	-0.146309	-0.0189826	NPX ~ Mig * Age_c + NSS_17_c + ANO_c + Sex + Error(SampleID)		0.10
SFRP1	ENSG00000104332	Neurology	Q8N474	OID20984	Mig	0.233942	0.000500274	0.0332857	Significant	-0.565903	-0.534339	NPX ~ Mig * Age_c + NSS_17_c + ANO_c + Sex + Error(SampleID)	46	0.26
IL6ST	ENSG00000134352	Cardiometabolic	P40189	OID20147	Mig	0.234724	0.000515673	0.0335305	Significant	-0.201761	-0.210186	NPX ~ Mig * Age_c + NSS_17_c + ANO_c + Sex + Error(SampleID)	45	0.04
C1RL	ENSG00000139178	Inflammation_II	Q9NZP8	OID30721	Mig	0.228142	0.000528671	0.0336117	Significant	-0.263618	-0.289866	NPX ~ Mig * Age_c + NSS_17_c + ANO_c + Sex + Error(SampleID)	47	0.08
RANBP2	ENSG00000153201	Neurology_II	P49792	OID30812	Age_c	0.182462	0.00197624	0.033655	Significant	-0.123085	0.0481372	NPX ~ Mig * Age_c + NSS_17_c + ANO_c + Sex + Error(SampleID)		0.46
CD6	ENSG00000013725	Inflammation	P30203	OID20649	Age_c	0.186012	0.00197518	0.033655	Significant	-0.0711721	-0.0429389	NPX ~ Mig * Age_c + NSS_17_c + ANO_c + Sex + Error(SampleID)		0.34
APLP1	ENSG00000105290	Cardiometabolic	P51693	OID20164	Age_c	0.192464	0.0020378	0.0337002	Significant	-0.309738	-0.0564079	NPX ~ Mig * Age_c + NSS_17_c + ANO_c + Sex + Error(SampleID)		0.58
HEPACAM2	ENSG00000188175	Neurology_II	A8MVW5	OID31151	Age_c	0.181559	0.00203352	0.0337002	Significant	0.0806609	0.0452547	NPX ~ Mig * Age_c + NSS_17_c + ANO_c + Sex + Error(SampleID)		0.41
CD83	ENSG00000112149	Inflammation	Q01151	OID20565	Age_c	0.196473	0.00203467	0.0337002	Significant	-0.407144	-0.0366392	NPX ~ Mig * Age_c + NSS_17_c + ANO_c + Sex + Error(SampleID)		0.19
SPINK5	ENSG00000133710	Neurology	Q9NQ38	OID21148	Age_c	0.182085	0.00199996	0.0337002	Significant	-0.114637	0.0239541	NPX ~ Mig * Age_c + NSS_17_c + ANO_c + Sex + Error(SampleID)		0.11
PRTG	ENSG00000166450	Oncology	Q2VWP7	OID21443	Age_c	0.185177	0.00202715	0.0337002	Significant	-0.284678	-0.0201397	NPX ~ Mig * Age_c + NSS_17_c + ANO_c + Sex + Error(SampleID)		0.07
DDX58		Oncology	O95786	OID21226	Age_c	0.200271	0.00205388	0.0337711	Significant	-0.12998	-0.0941347	NPX ~ Mig * Age_c + NSS_17_c + ANO_c + Sex + Error(SampleID)		1.14
PLXNB2	ENSG00000196576	Cardiometabolic	O15031	OID20317	Age_c	0.181007	0.00206936	0.0338311	Significant	-0.171242	-0.0186113	NPX ~ Mig * Age_c + NSS_17_c + ANO_c + Sex + Error(SampleID)		0.07
TNFSF8	ENSG00000106952	Cardiometabolic_II	P32971	OID30384	Age_c	0.179769	0.00215191	0.0349808	Significant	-0.0595849	-0.035048	NPX ~ Mig * Age_c + NSS_17_c + ANO_c + Sex + Error(SampleID)		0.25
NELL2	ENSG00000184613	Inflammation	Q99435	OID20706	Mig:Age_c	0.235037	0.000359786	0.0354948	Significant	-0.227151	-0.0209692	NPX ~ Mig * Age_c + NSS_17_c + ANO_c + Sex + Error(SampleID)		0.21
FGFBP3	ENSG00000174721	Neurology_II	Q8TAT2	OID31108	Mig	0.220107	0.000572477	0.0355407	Significant	-0.555885	-0.555394	NPX ~ Mig * Age_c + NSS_17_c + ANO_c + Sex + Error(SampleID)	48	0.30
JAM2	ENSG00000154721	Neurology	P57087	OID21064	Mig	0.219187	0.00058917	0.0355407	Significant	-0.301217	-0.293158	NPX ~ Mig * Age_c + NSS_17_c + ANO_c + Sex + Error(SampleID)	48	0.08
ERP44	ENSG00000023318	Oncology	Q9BS26	OID21338	Mig	0.230205	0.000596279	0.0355407	Significant	-0.259322	-0.234953	NPX ~ Mig * Age_c + NSS_17_c + ANO_c + Sex + Error(SampleID)	45	0.05
LTA4H	ENSG00000111144	Oncology	P09960	OID21452	Age_c	0.182314	0.00221576	0.035614	Significant	0.0284473	-0.0966908	NPX ~ Mig * Age_c + NSS_17_c + ANO_c + Sex + Error(SampleID)		1.76
CTRL	ENSG00000141086	Neurology_II	P40313	OID31157	Age_c	0.178872	0.0022138	0.035614	Significant	-0.209528	0.0608622	NPX ~ Mig * Age_c + NSS_17_c + ANO_c + Sex + Error(SampleID)		0.76
CD3E	ENSG00000198851	Oncology_II	P07766	OID31302	Mig:Age_c	0.240051	0.000408307	0.0366603	Significant	-0.977644	-0.0686505	NPX ~ Mig * Age_c + NSS_17_c + ANO_c + Sex + Error(SampleID)		2.23
SCARB1	ENSG00000073060	Neurology	Q8WTV0	OID20805	Mig:Age_c	0.248773	0.000418596	0.0366603	Significant	-0.211412	-0.0590401	NPX ~ Mig * Age_c + NSS_17_c + ANO_c + Sex + Error(SampleID)		1.63
SLAMF6	ENSG00000162739	Oncology	Q96DU3	OID21254	Mig:Age_c	0.253477	0.000422856	0.0366603	Significant	-0.347272	-0.0333656	NPX ~ Mig * Age_c + NSS_17_c + ANO_c + Sex + Error(SampleID)		0.43
SETMAR	ENSG00000170364	Neurology	Q53H47	OID20948	Mig:Age_c	0.239197	0.000419628	0.0366603	Significant	-0.357443	-0.0255635	NPX ~ Mig * Age_c + NSS_17_c + ANO_c + Sex + Error(SampleID)		0.31
TMED4	ENSG00000158604	Cardiometabolic_II	Q7Z7H5	OID30154	Age_c	0.177646	0.00230109	0.0367789	Significant	-0.430723	0.0948212	NPX ~ Mig * Age_c + NSS_17_c + ANO_c + Sex + Error(SampleID)		1.86
TNFRSF6B	ENSG00000243509	Neurology	O95407	OID20964	Mig	0.225877	0.000643126	0.0367997	Significant	-0.836851	-0.875358	NPX ~ Mig * Age_c + NSS_17_c + ANO_c + Sex + Error(SampleID)	46	0.72
SLITRK1	ENSG00000178235	Inflammation_II	Q96PX8	OID30510	Mig	0.215735	0.000640014	0.0367997	Significant	-0.475515	-0.581315	NPX ~ Mig * Age_c + NSS_17_c + ANO_c + Sex + Error(SampleID)	48	0.33
CRNN	ENSG00000143536	Oncology	Q9UBG3	OID21427	Age_c	0.18089	0.00231584	0.0368089	Significant	-0.0245484	-0.0685485	NPX ~ Mig * Age_c + NSS_17_c + ANO_c + Sex + Error(SampleID)		0.89
TNFSF8	ENSG00000106952	Cardiometabolic_II	P32971	OID30384	Mig:Age_c	0.229069	0.000438413	0.0368849	Significant	-0.0595849	-0.0223993	NPX ~ Mig * Age_c + NSS_17_c + ANO_c + Sex + Error(SampleID)		0.25
NRP2	ENSG00000118257	Neurology	O60462	OID21081	Mig:Age_c	0.228196	0.000451231	0.0368849	Significant	-0.277785	-0.0178488	NPX ~ Mig * Age_c + NSS_17_c + ANO_c + Sex + Error(SampleID)		0.16
KIAA0319	ENSG00000137261	Neurology_II	Q5VV43	OID31094	Mig	0.214646	0.000666189	0.0369413	Significant	-0.407236	-0.506866	NPX ~ Mig * Age_c + NSS_17_c + ANO_c + Sex + Error(SampleID)	48	0.26
NAGPA	ENSG00000103174	Inflammation_II	Q9UK23	OID30643	Mig	0.214856	0.000671424	0.0369413	Significant	-0.189162	-0.215828	NPX ~ Mig * Age_c + NSS_17_c + ANO_c + Sex + Error(SampleID)	48	0.05
CD48	ENSG00000117091	Inflammation	P09326	OID20692	Age_c	0.177125	0.00233926	0.0369758	Significant	-0.190683	-0.027753	NPX ~ Mig * Age_c + NSS_17_c + ANO_c + Sex + Error(SampleID)		0.16
CCN3	ENSG00000136999	Cardiometabolic	P48745	OID20299	Mig	0.213545	0.000691611	0.037149	Significant	-0.535254	-0.590639	NPX ~ Mig * Age_c + NSS_17_c + ANO_c + Sex + Error(SampleID)	48	0.35
TAFA5	ENSG00000219438	Oncology	Q7Z5A7	OID21321	Mig	0.224949	0.000714155	0.037149	Significant	-0.579368	-0.58326	NPX ~ Mig * Age_c + NSS_17_c + ANO_c + Sex + Error(SampleID)	45	0.32
PRTG	ENSG00000166450	Oncology	Q2VWP7	OID21443	Mig	0.219629	0.000710326	0.037149	Significant	-0.284678	-0.275921	NPX ~ Mig * Age_c + NSS_17_c + ANO_c + Sex + Error(SampleID)	47	0.07
PPM1A	ENSG00000100614	Oncology	P35813	OID21184	Age_c	0.194816	0.00240476	0.0378023	Significant	-0.101095	0.0491237	NPX ~ Mig * Age_c + NSS_17_c + ANO_c + Sex + Error(SampleID)		0.32
SCG2	ENSG00000171951	Oncology	P13521	OID21400	Age_c	0.17941	0.00242455	0.0378384	Significant	-0.400351	-0.0372098	NPX ~ Mig * Age_c + NSS_17_c + ANO_c + Sex + Error(SampleID)		0.27
IL18BP	ENSG00000137496	Cardiometabolic	O95998	OID20348	Age_c	0.175871	0.00243351	0.0378384	Significant	-0.020681	-0.030479	NPX ~ Mig * Age_c + NSS_17_c + ANO_c + Sex + Error(SampleID)		0.19
[truncated: 16,866 more rows]

## Sheet: ST4_reversal
Assay	GeneID	Panel	Assay_Panel	OlinkID	UniProt	estimate_npc_vs_ctrl	estimate_npc_mig_vs_npc_no_mig	sig_npc_vs_ctrl	sig_npc_mig_vs_npc_no_mig	Adjusted_pval_npc_vs_ctrl	Adjusted_pval_npc_mig_vs_npc_no_mig	p.value_npc_vs_ctrl	p.value_npc_mig_vs_npc_no_mig	status	significant_in_both	reversal	rank_abs	reversal_sig_both	NPC28b	NPC121a	C144	NPC109b	NPC127a	NPC34c	C149	NPC109a	NPC5g	NPC123a	C151	NPC105c	NPC130a	NPC44b	NPC52c	C303	NPC6d	NPC50a	NPC41b	NPC40a	NPC75a	NPC77c	C306	NPC28a	NPC67a	NPC73a	NPC3e	C314	C113	NPC29a	NPC8c
[truncated: 2,861 more rows]
[truncated: 57 more columns]

[truncated: 6 more sheets: ST5_Correlation, ST6_Overlapcorrelation, ST7_ANO, ST8_NSS17, ST9_Annotations, ST10_Brainspecific]
